# Supplementary material for: The Proteome Signatures of Fibroblasts from Patients with Severe, Intermediate and Mild Spinal Muscular Atrophy Show Limited Overlap
Source: MDPI journal article supplement (doi:10.3390/cells11172624), 2022-08-23
Supplement: s1 [file s1]

# **The Proteome Signatures of Fibroblasts from Patients with Severe, Intermediate and Mild Spinal Muscular Atrophy Show Limited Overlap**

## **Supplementary File**

Sharon J Brown<sup>1,2</sup>, Rachel A Kline<sup>3,4</sup>, Silvia A Synowsky<sup>5</sup>, Sally L Shirran<sup>5</sup>, Ian Holt<sup>2</sup>, Kelly A Sillence<sup>6</sup>, Peter Claus<sup>7</sup>, Brunhilde Wirth<sup>8</sup>, Thomas M Wishart<sup>3,4</sup>, Heidi R Fuller<sup>1,2\*</sup>

<sup>1</sup> School of Pharmacy and Bioengineering (PhaB), Keele University, Keele ST5 5BG, UK

<sup>2</sup> Wolfson Centre for Inherited Neuromuscular Disease, RJA Orthopaedic Hospital, Oswestry SY10 7AG, UK

<sup>3</sup> The Roslin Institute and Royal (Dick) School of Veterinary Studies, University of Edinburgh, Midlothian EH25 9RG, UK

<sup>4</sup> Euan MacDonald Centre, University of Edinburgh, Edinburgh EH16 4SB, UK

<sup>5</sup> BSRC Mass Spectrometry and Proteomics Facility, University of St Andrews, St Andrews, KY16 9ST, UK

<sup>6</sup> Bio-Rad Laboratories, Watford WD17 1ET, UK

<sup>7</sup> SMATHERIA gGmbH—Non-Profit Biomedical Research Institute, Hannover, Germany

<sup>8</sup> Institute of Human Genetics, University Hospital of Cologne, University of Cologne, 50931 Cologne, Germany

<sup>9</sup> Center for Rare Diseases, University Hospital of Cologne, University of Cologne, 50931 Cologne, Germany

<sup>10</sup> Center for Molecular Medicine Cologne, University of Cologne, 50931 Cologne, Germany

<sup>11</sup> Institute for Genetics, University of Cologne, 50931 Cologne, Germany

\* Correspondence: h.r.fuller@keele.ac.uk; Tel.: +44-(0)1-782-734546

## Fibroblast cells used in the study:

| Cell line identifier                                                     | Biopsy source                      | Gender | Age when biopsy taken | Clinical diagnosis | Supplier                                                                                                        |
|--------------------------------------------------------------------------|------------------------------------|--------|-----------------------|--------------------|-----------------------------------------------------------------------------------------------------------------|
| <b>Cell lines used in the SMA I vs age-matched controls comparison</b>   |                                    |        |                       |                    |                                                                                                                 |
| F012-16N-ML                                                              | skin of left upper arm, outer side | F      | 4 months              | SMA I              | Originally from University of Cologne (ID ML112) Newcastle MRC Centre Biobank for Rare & Neuromuscular Diseases |
| F011-16N-ML                                                              | skin of left upper arm, outer side | M      | 4 months              | SMA I              | Originally from University of Cologne (ID ML107) Newcastle MRC Centre Biobank for Rare & Neuromuscular Diseases |
| F010-16N-ML                                                              | skin of left upper arm, outer side | F      | 6 months              | SMA I              | Originally from University of Cologne (ID ML111) Newcastle MRC Centre Biobank for Rare & Neuromuscular Diseases |
| GM00232                                                                  |                                    | M      | 7 months              | SMA I              | Coriell Cell Repository                                                                                         |
| GM09677                                                                  |                                    | M      | 2 years               | SMA I              | Coriell Cell Repository                                                                                         |
| GM08333                                                                  | foreskin                           | M      | 5 months              | Control            | Coriell Cell Repository                                                                                         |
| GM00302                                                                  |                                    | M      | 10 months             | Control*           | Coriell Cell Repository                                                                                         |
| GM05659                                                                  | chest                              | M      | 1 year                | Control*           | Coriell Cell Repository                                                                                         |
| GM00498                                                                  |                                    | M      | 3 years               | Control*           | Coriell Cell Repository                                                                                         |
| <b>Cell lines used in the SMA II vs age-matched controls comparison</b>  |                                    |        |                       |                    |                                                                                                                 |
| GM022592                                                                 |                                    | M      | 1 year                | SMA II             | Coriell Cell Repository                                                                                         |
| GM03813                                                                  | arm                                | M      | 3 years               | SMA II             | Coriell Cell Repository                                                                                         |
| F002-15N                                                                 |                                    | M      | 3 years               | SMA II             | Newcastle MRC Centre Biobank for Rare & Neuromuscular Diseases                                                  |
| F211-14N                                                                 |                                    | F      | 23 years              | SMA II             | Newcastle MRC Centre Biobank for Rare & Neuromuscular Diseases                                                  |
| F018-15N                                                                 |                                    | M      | 25 years              | SMA II             | Newcastle MRC Centre Biobank for Rare & Neuromuscular Diseases                                                  |
| GM00302                                                                  |                                    | M      | 10 months             | Control*           | Coriell Cell Repository                                                                                         |
| GM05659                                                                  | chest                              | M      | 1 year                | Control*           | Coriell Cell Repository                                                                                         |
| GM00498                                                                  |                                    | M      | 3 years               | Control*           | Coriell Cell Repository                                                                                         |
| F152-14N                                                                 |                                    | F      | 27 years              | Control**          | Newcastle MRC Centre Biobank for Rare & Neuromuscular Diseases                                                  |
| <b>Cell lines used in the SMA III vs age-matched controls comparison</b> |                                    |        |                       |                    |                                                                                                                 |
| F053-15N                                                                 |                                    | M      | 17 years              | SMA III            | Newcastle MRC Centre Biobank for Rare & Neuromuscular Diseases                                                  |
| F210-14N                                                                 |                                    | F      | 22 years              | SMA III            | Newcastle MRC Centre Biobank for Rare & Neuromuscular Diseases                                                  |
| F055-15N                                                                 |                                    | M      | 44 years              | SMA III            | Newcastle MRC Centre Biobank for Rare & Neuromuscular Diseases                                                  |
| F206-14N                                                                 |                                    | M      | 66 years              | SMA III            | Newcastle MRC Centre Biobank for Rare & Neuromuscular Diseases                                                  |
| F152-14N                                                                 |                                    | F      | 27 years              | Control**          | Newcastle MRC Centre Biobank for Rare & Neuromuscular Diseases                                                  |
| F154-14N                                                                 |                                    | F      | 34 years              | Control            | Newcastle MRC Centre Biobank for Rare & Neuromuscular Diseases                                                  |
| F008-16N                                                                 |                                    | M      | 39 years              | Control            | Newcastle MRC Centre Biobank for Rare & Neuromuscular Diseases                                                  |
| F011-11N                                                                 |                                    | F      | 45 years              | Control            | Newcastle MRC Centre Biobank for Rare & Neuromuscular Diseases                                                  |
| F067-16N                                                                 |                                    | F      | 66 years              | Control            | Newcastle MRC Centre Biobank for Rare & Neuromuscular Diseases                                                  |

**Table S1:** Cell identity, source of biopsy, gender, age of patient when sampled, phenotype and source of cells are listed for the fibroblasts used in this study. \*These cells lines were used as age-matched controls in the SMA I and SMA II comparisons. \*\*This cell line was used as an age-matched control in both the SMA II and SMA III comparisons.

**Summary of antibodies used for western blotting:**

| Target protein                                                | Antibody                 | Supplier & Source                               | Molecular Weight (kDa) | Dilution |
|---------------------------------------------------------------|--------------------------|-------------------------------------------------|------------------------|----------|
| Survival motor neuron (SMN)                                   | MANSMA12; Clone 2E6      | Wolfson CIND; Mouse monoclonal                  | 38                     | 1:100    |
| Insulin-like growth factor 2 mRNA-binding protein 1           | IMP1 (D33A2); #8482      | Cell Signaling Technology; Rabbit monoclonal    | 64                     | 1:500    |
| Glycogen phosphorylase, brain form                            | PYGB/M (17B6); sc-51923  | Santa Cruz BioTechnology, Inc; Mouse monoclonal | 97                     | 1:200    |
| Ras-related protein Rab-3B                                    | Rab 3B (48-K2); sc-81911 | Santa Cruz BioTechnology, Inc; Mouse monoclonal | 25                     | 1:50     |
| Signal transducer and activator of transcription 1-alpha/beta | STAT1; 10144-2-AP        | Proteintech; Rabbit polyclonal                  | 84                     | 1:500    |

**Table S2:** Details of target protein, antibody name and associated clone, supplier, source, expected molecular weight and dilution of antibodies used in this study.

A

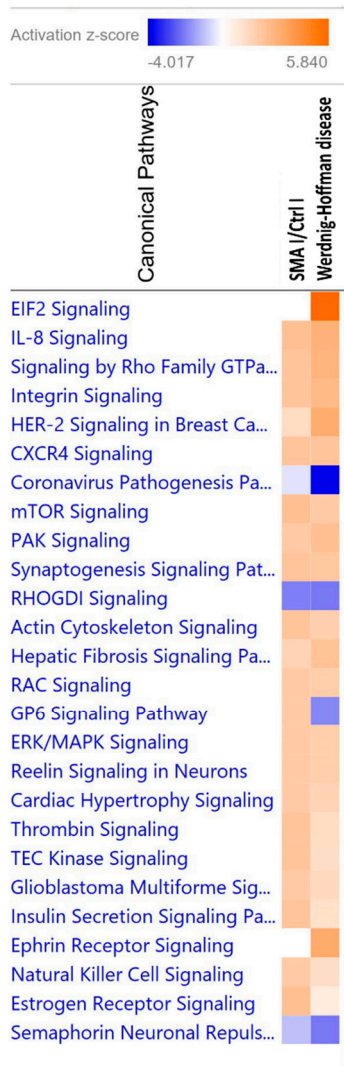

B

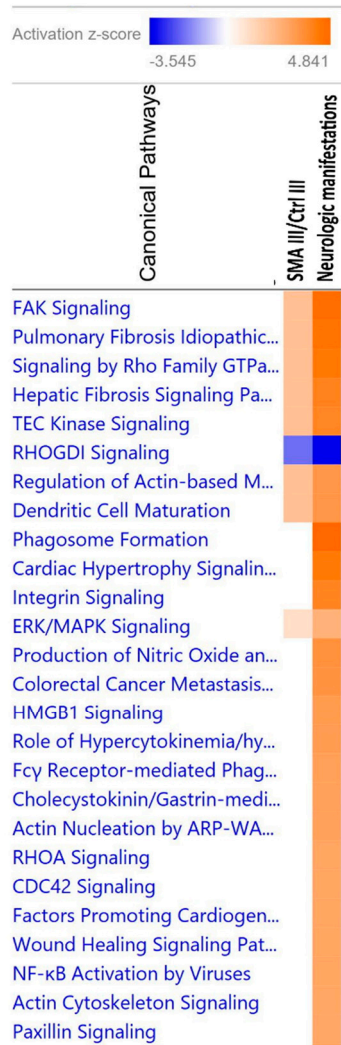

C

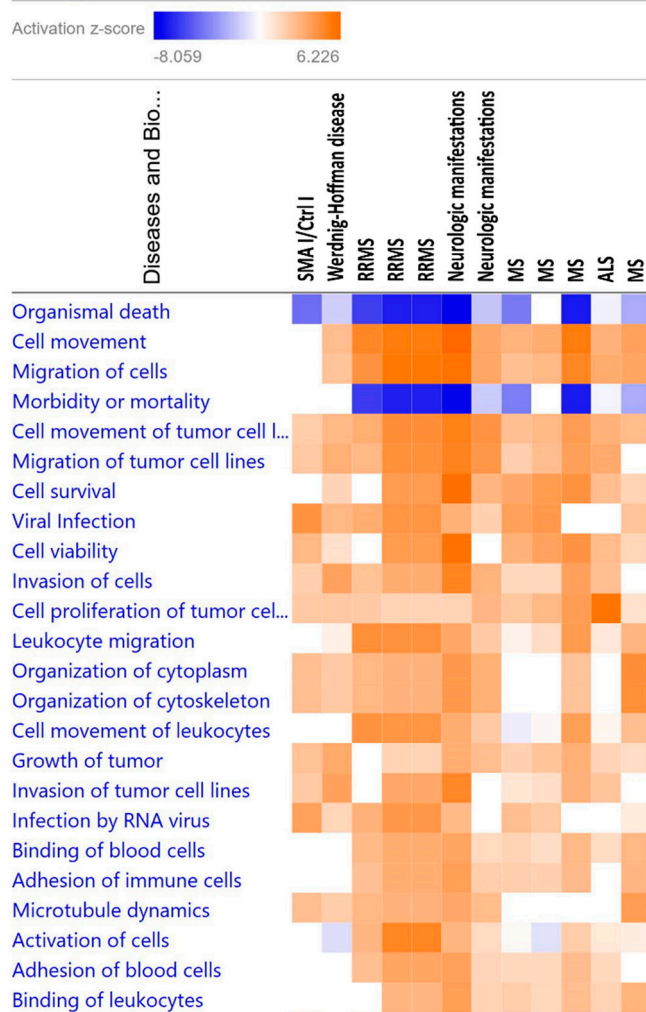

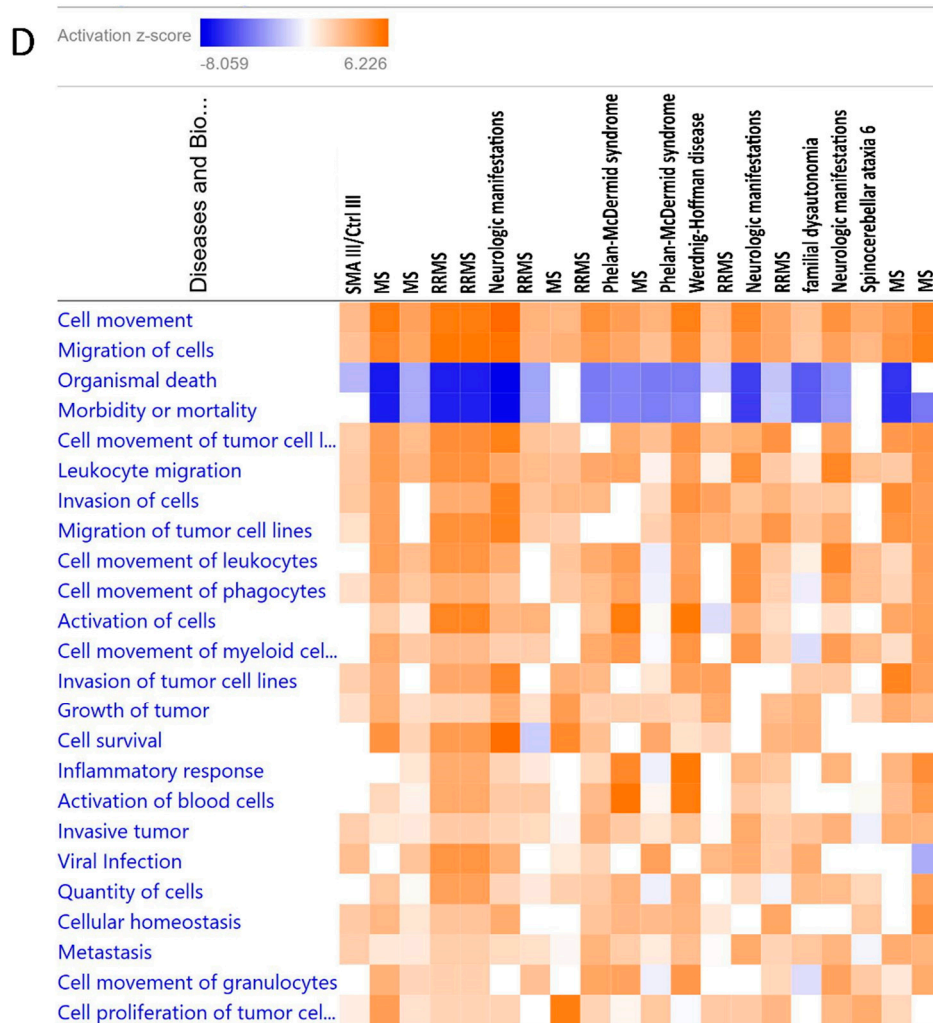

**Figure S1:** Heat maps using z-scores to illustrate the degree of overlap between proteomic datasets generated in this study with previous SMA studies and studies of neurological conditions with similar outcomes to SMA identified via IPA<sup>®</sup> Analysis Match. Only signatures with a minimum positive z-score of 50 and using either skin or peripheral blood as the tissues of interest were included. Analysis Match outcomes for canonical pathways identified from (A) the SMA I dataset and (B) the SMA III dataset and Analysis Match outcomes for diseases & functions identified using (C) the SMA I dataset and (D) the SMA III dataset. MS = multiple sclerosis; RRMS = relapsing-remitting multiple sclerosis

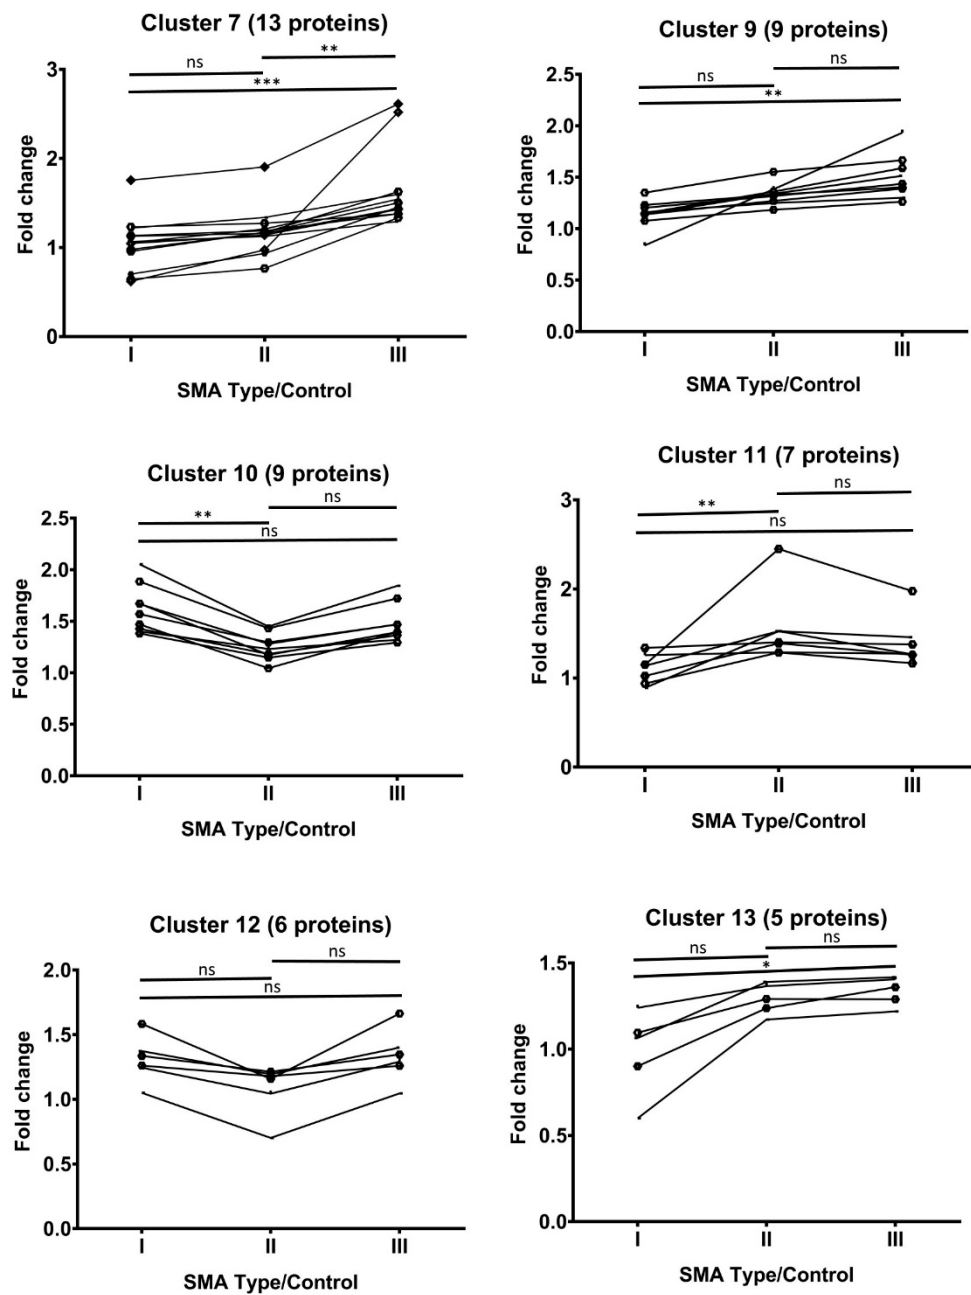

**Figure S2:** Clusters identified from BioLayout Express 3D analysis of protein expression trends across the three SMA types that met the criteria for differential expression in at least one SMA type (i.e., detected with 2 or more peptides; fold change  $\geq 1.25$  or  $\leq 0.80$ ; significant difference of  $p \leq 0.05$ ). Each point represents a fold change in protein expression relative to age-match controls with connecting lines illustrating the trends between SMA I, II and III. Bars indicate level of significance between each SMA type with \* $p < 0.05$ ; \*\* $p < 0.01$  & \*\*\* $p < 0.0001$ .

|              | PYBG                    | STAT1                   | RAB3B                   |
|--------------|-------------------------|-------------------------|-------------------------|
| Type I SMA   | Significantly increased | Potentially increased   | Unchanged               |
| Type II SMA  | Potentially increased   | Unchanged               | Significantly increased |
| Type III SMA | Unchanged               | Significantly increased | Potentially increased   |

**Figure S3:** Table illustrating how the differential expression of PYGB, STAT1 and RAB3B, as determined via SWATH mass spectrometry and confirmed via western blots, relate to SMA severity.
