# Supplementary material for: The Proteome Signatures of Fibroblasts from Patients with Severe, Intermediate and Mild Spinal Muscular Atrophy Show Limited Overlap
Source: Cells. 2022 Aug 23;11(17):2624. doi: 10.3390/cells11172624 (PMC9454632; doi:10.3390/cells11172624)
Supplement: Supplementary file 1 [file cells-11-02624-s001.zip › Supplementary Tables.xlsx]

## Sheet: S3. Unfiltered data
	Supplementary Table S3. A protein summary of all the proteins identified by SWATH mass spectrometry analysis of SMA and control fibroblast protein extracts. After the SWATH spectra were imported, peaks were reintegrated using the mprophet peak scoring model. Sum total area, which was used to determine fold differences in the protein expression between each SMA Type and their respective age-matche…
Protein Accession	Protein Description	Protein	SMAIII type I 1 Count Peptide Modified Sequence	SMAIII type I 1 Sum Total Area	SMAIII type I 1 Sum Normalized Area	SMAIII type I 2 Count Peptide Modified Sequence	SMAIII type I 2 Sum Total Area	SMAIII type I 2 Sum Normalized Area	SMAIII type II 1 Count Peptide Modified Sequence	SMAIII type II 1 Sum Total Area	SMAIII type II 1 Sum Normalized Area	SMAIII type II 2 Count Peptide Modified Sequence	SMAIII type II 2 Sum Total Area	SMAIII type II 2 Sum Normalized Area	SMAIII type II 3 Count Peptide Modified Sequence	SMAIII type II 3 Sum Total Area	SMAIII type II 3 Sum Normalized Area	SMAIII type II 4 Count Peptide Modified Sequence	SMAIII type II 4 Sum Total Area	SMAIII type II 4 Sum Normalized Area	SMAIII type II 5 Count Peptide Modified Sequence	SMAIII type II 5 Sum Total Area	SMAIII type II 5 Sum Normalized Area	SMAIII type III 1 Count Peptide Modified Sequence	SMAIII type III 1 Sum Total Area	SMAIII type III 1 Sum Normalized Area	SMAIII type III 2 Count Peptide Modified Sequence	SMAIII type III 2 Sum Total Area	SMAIII type III 2 Sum Normalized Area	SMAIII type III 3 Count Peptide Modified Sequence	SMAIII type III 3 Sum Total Area	SMAIII type III 3 Sum Normalized Area	SMAIII type III 4 Count Peptide Modified Sequence	SMAIII type III 4 Sum Total Area	SMAIII type III 4 Sum Normalized Area	SMAIII type I 3 Count Peptide Modified Sequence	SMAIII type I 3 Sum Total Area	SMAIII type I 3 Sum Normalized Area	SMAIII type I 4 Count Peptide Modified Sequence	SMAIII type I 4 Sum Total Area	SMAIII type I 4 Sum Normalized Area	SMAIII type I 5 Count Peptide Modified Sequence	SMAIII type I 5 Sum Total Area	SMAIII type I 5 Sum Normalized Area	Ctrl 1 Count Peptide Modified Sequence	Ctrl 1 Sum Total Area	Ctrl 1 Sum Normalized Area	Ctrl 2 Count Peptide Modified Sequence	Ctrl 2 Sum Total Area
		Biognosys|iRT-Kit_WR_fusion	18	33066127	57000000	18	29686893	49700000	18	34627267	59900000	18	36974214	63700000	18	36030520	62100000	18	31875115	54800000	18	34148693	58500000	18	32406335	56000000	18	34342246	58900000	18	32834982	56400000	18	32851839	57200000	18	30767341	52000000	18	30130359	52300000	18	29971055	52400000	18	32876433	56400000	18	32249743
A0A0K0K1G8	T cell receptor beta variable 10-2 OS=Homo sapiens OX=9606 GN=TRBV10-2 PE=3 SV=3	sp|A0A0K0K1G8|TVBJ2_HUMAN	1	3569	3570	1	3225	3230	1	3836	3840	1	2044	2040	1	1333	1330	1	1440	1440	1	1563	1560	1	2406	2410	1	1757	1760	1	6191	6190	1	3319	3320	1	4166	4170	1	1617	1620	1	728	728	1	2478	2480	1	3320
A0AVT1	Ubiquitin-like modifier-activating enzyme 6 OS=Homo sapiens OX=9606 GN=UBA6 PE=1 SV=1	sp|A0AVT1|UBA6_HUMAN	1	1108	1110	1	1787	1790	1	8162	8160	1	4958	4960	1	1404	1400	1	4198	#N/A	1	3452	3450	1	6045	6040	1	2422	#N/A	1	1164	1160	1	6989	6990	1	1199	#N/A	1	4819	4820	1	2047	2050	1	3521	3520	1	938
A1A4S6	Rho GTPase-activating protein 10 OS=Homo sapiens OX=9606 GN=ARHGAP10 PE=1 SV=1	sp|A1A4S6|RHG10_HUMAN	2	16487	16500	2	19499	19500	2	19175	19200	2	14677	14700	2	7365	7370	2	19887	19900	2	12735	12700	2	31158	31200	2	25481	25500	2	24082	24100	2	23340	13700	2	42854	42900	2	19158	19200	2	33358	33400	2	13009	3470	2	13131
A1L0T0	Acetolactate synthase-like protein OS=Homo sapiens OX=9606 GN=ILVBL PE=1 SV=2	sp|A1L0T0|ILVBL_HUMAN	9	184568	233000	9	93606	118000	9	183550	198000	9	116269	155000	9	80226	113000	9	155742	221000	9	102323	127000	9	110398	153000	9	111000	146000	9	163353	227000	9	136003	166000	9	116313	113000	9	127453	171000	9	171705	185000	9	103607	103000	9	92018
A1X283	SH3 and PX domain-containing protein 2B OS=Homo sapiens OX=9606 GN=SH3PXD2B PE=1 SV=3	sp|A1X283|SPD2B_HUMAN	8	138306	145000	8	123076	73200	8	271487	297000	8	159029	172000	8	76110	76000	8	183932	148000	8	116918	124000	8	211599	232000	8	144063	134000	8	164273	148000	8	85880	89900	8	109263	126000	8	155694	165000	8	157806	109000	8	163499	134000	8	238431
A2RRP1	Neuroblastoma-amplified sequence OS=Homo sapiens OX=9606 GN=NBAS PE=1 SV=2	sp|A2RRP1|NBAS_HUMAN	1	439	439	1	217	217	1	1282	1280	1	440	440	1	60	#N/A	1	273	273	1	111	111	1	222	222	1	161	161	1	222	222	1	222	222	1	193	#N/A	1	329	329	1	111	111	1	222	222	1	162
A5A3E0	POTE ankyrin domain family member F OS=Homo sapiens OX=9606 GN=POTEF PE=1 SV=2	sp|A5A3E0|POTEF_HUMAN	2	26663	26700	2	22840	22800	2	18748	18700	2	21347	21300	2	7479	7480	2	32735	32700	2	22368	22400	2	34627	34600	2	28947	28900	2	36406	36400	2	31713	31700	2	9091	9090	2	22516	22500	2	31315	31300	2	7620	7620	2	33772
A5D8V6	Vacuolar protein sorting-associated protein 37C OS=Homo sapiens OX=9606 GN=VPS37C PE=1 SV=2	sp|A5D8V6|VP37C_HUMAN	1	29178	29200	1	21248	#N/A	1	15577	15600	1	10341	#N/A	1	10622	#N/A	1	13482	#N/A	1	18263	#N/A	1	21057	21100	1	14961	#N/A	1	17456	#N/A	1	19320	19300	1	26160	#N/A	1	15587	15600	1	28916	#N/A	1	16883	#N/A	1	19419
A6NDG6	Glycerol-3-phosphate phosphatase OS=Homo sapiens OX=9606 GN=PGP PE=1 SV=1	sp|A6NDG6|PGP_HUMAN	8	115712	106000	8	91841	88700	8	157627	158000	8	97537	91000	8	38579	28600	8	113905	80100	8	60549	41700	8	119721	120000	8	71784	40300	8	97409	73400	8	107923	108000	8	90462	68200	8	100553	101000	8	57190	54300	8	92762	65400	8	138981
A6NDU8	UPF0600 protein C5orf51 OS=Homo sapiens OX=9606 GN=C5orf51 PE=1 SV=1	sp|A6NDU8|CE051_HUMAN	3	24240	46100	3	7436	12900	3	59593	116000	3	6391	10700	3	7363	13000	3	68664	134000	3	8594	14500	3	105980	210000	3	36035	#N/A	3	7378	13600	3	17451	32400	3	37178	1510	3	82510	163000	3	24722	48500	3	8138	14900	3	78932
A6NHQ2	rRNA/tRNA 2'-O-methyltransferase fibrillarin-like protein 1 OS=Homo sapiens OX=9606 GN=FBLL1 PE=3 SV=2	sp|A6NHQ2|FBLL1_HUMAN	1	30573	30600	1	47265	47300	1	105343	105000	1	50973	51000	1	21157	#N/A	1	73890	#N/A	1	49906	#N/A	1	43001	43000	1	42667	#N/A	1	35847	#N/A	1	50104	50100	1	27468	#N/A	1	76358	76400	1	54924	54900	1	41461	41500	1	64839
A6NHX0	Cytosolic arginine sensor for mTORC1 subunit 2 OS=Homo sapiens OX=9606 GN=CASTOR2 PE=1 SV=3	sp|A6NHX0|CAST2_HUMAN	2	19585	39200	2	4082	#N/A	2	6736	13500	2	17358	#N/A	2	5121	10200	2	4085	8170	2	5891	11800	2	29267	58500	2	7902	15800	2	2686	5370	2	4398	#N/A	2	7604	15200	2	3127	#N/A	2	4065	8130	2	13454	#N/A	2	27296
A6ZKI3	Retrotransposon Gag-like protein 8B OS=Homo sapiens OX=9606 GN=RTL8C PE=1 SV=1	sp|A6ZKI3|RTL8C_HUMAN	1	6225	6230	1	1375	1380	1	6392	6390	1	5998	6000	1	1247	#N/A	1	676	676	1	1603	1600	1	10709	10700	1	1803	1800	1	1284	#N/A	1	3376	3380	1	565	565	1	10808	10800	1	725	725	1	15032	15000	1	4229
A8MXV4	Nucleoside diphosphate-linked moiety X motif 19 OS=Homo sapiens OX=9606 GN=NUDT19 PE=1 SV=1	sp|A8MXV4|NUD19_HUMAN	1	18865	18900	1	4356	#N/A	1	21932	21900	1	13357	13400	1	3573	3570	1	24759	24800	1	8068	8070	1	13115	13100	1	11803	11800	1	14657	#N/A	1	17463	17500	1	8645	8650	1	20821	20800	1	7082	7080	1	11012	11000	1	17512
A9QM74	Importin subunit alpha-8 OS=Homo sapiens OX=9606 GN=KPNA7 PE=1 SV=1	sp|A9QM74|IMA8_HUMAN	1	74453	74500	1	13827	13800	1	122073	122000	1	62618	62600	1	60103	60100	1	57495	57500	1	73737	73700	1	62630	62600	1	47075	47100	1	54919	54900	1	60720	60700	1	50087	50100	1	125504	126000	1	116551	117000	1	69332	69300	1	98948
B5MCN3	Putative SEC14-like protein 6 OS=Homo sapiens OX=9606 GN=SEC14L6 PE=5 SV=1	sp|B5MCN3|S14L6_HUMAN	1	115467	115000	1	62465	62500	1	161986	162000	1	103626	104000	1	86138	86100	1	101407	101000	1	124766	125000	1	122781	123000	1	114257	114000	1	116335	116000	1	131668	132000	1	160355	160000	1	101505	102000	1	103716	104000	1	104094	104000	1	140684
C9JLW8	Mapk-regulated corepressor-interacting protein 1 OS=Homo sapiens OX=9606 GN=MCRIP1 PE=1 SV=1	sp|C9JLW8|MCRI1_HUMAN	5	104263	85900	5	38141	47400	5	46566	58400	5	28214	34100	5	35557	50600	5	57583	66500	5	35737	44100	5	40335	48600	5	40975	50400	5	39006	44700	5	45144	48700	5	51758	65600	5	65208	90800	5	36209	31700	5	33077	50600	5	55345
E9PRG8	Uncharacterized protein C11orf98 OS=Homo sapiens OX=9606 GN=C11orf98 PE=4 SV=1	sp|E9PRG8|CK098_HUMAN	1	10889	10900	1	39069	39100	1	7944	7940	1	10421	10400	1	18154	18200	1	42363	42400	1	18002	18000	1	14086	14100	1	20262	20300	1	31664	31700	1	23339	23300	1	21752	21800	1	2489	#N/A	1	7424	7420	1	26526	26500	1	11707
O00116	Alkyldihydroxyacetonephosphate synthase, peroxisomal OS=Homo sapiens OX=9606 GN=AGPS PE=1 SV=1	sp|O00116|ADAS_HUMAN	17	286284	341000	17	147444	172000	17	269739	338000	17	164418	174000	17	94445	81700	17	206599	111000	17	144039	145000	17	194256	213000	17	147826	138000	17	159978	193000	17	186613	228000	17	166500	116000	17	171953	199000	17	198733	195000	17	138638	177000	17	233326
O00148	ATP-dependent RNA helicase DDX39A OS=Homo sapiens OX=9606 GN=DDX39A PE=1 SV=2	sp|O00148|DX39A_HUMAN	2	45592	91200	2	41265	82500	2	111508	223000	2	64678	129000	2	30095	60200	2	62044	124000	2	57477	115000	2	56630	113000	2	50320	101000	2	44329	88700	2	61949	124000	2	63405	127000	2	46598	93200	2	29594	59200	2	39028	78100	2	92438
O00151	PDZ and LIM domain protein 1 OS=Homo sapiens OX=9606 GN=PDLIM1 PE=1 SV=4	sp|O00151|PDLI1_HUMAN	13	680482	1180000	13	242192	404000	13	737964	1170000	13	476579	813000	13	437377	788000	13	534884	841000	13	552839	1000000	13	660542	1040000	13	487828	818000	13	738522	1230000	13	642411	1090000	13	569177	936000	13	231275	321000	13	423220	662000	13	463625	704000	13	542573
O00160	Unconventional myosin-If OS=Homo sapiens OX=9606 GN=MYO1F PE=1 SV=3	sp|O00160|MYO1F_HUMAN	1	2797	2800	1	663	663	1	6369	6370	1	603	#N/A	1	890	890	1	1702	#N/A	1	1060	1060	1	1027	1030	1	1755	#N/A	1	1494	1490	1	3917	3920	1	874	874	1	4733	4730	1	3912	#N/A	1	1847	#N/A	1	5029
O00161	Synaptosomal-associated protein 23 OS=Homo sapiens OX=9606 GN=SNAP23 PE=1 SV=1	sp|O00161|SNP23_HUMAN	1	6199	6200	1	2577	2580	1	47092	47100	1	8399	8400	1	2242	2240	1	28125	28100	1	22148	22100	1	29318	29300	1	11289	11300	1	30193	#N/A	1	27642	27600	1	2867	2870	1	10945	10900	1	1801	1800	1	2079	2080	1	14654
O00170	AH receptor-interacting protein OS=Homo sapiens OX=9606 GN=AIP PE=1 SV=2	sp|O00170|AIP_HUMAN	5	133388	114000	5	85298	75400	5	107838	90300	5	74001	74000	5	76285	50100	5	166097	166000	5	75096	72300	5	114472	91300	5	112603	110000	5	118476	114000	5	96831	89500	5	112601	113000	5	96397	84500	5	99018	95700	5	90089	79800	5	99357
O00178	GTP-binding protein 1 OS=Homo sapiens OX=9606 GN=GTPBP1 PE=1 SV=3	sp|O00178|GTPB1_HUMAN	6	51389	47800	6	45367	45400	6	96105	66500	6	43961	29600	6	30262	27500	6	46745	46700	6	27589	21200	6	65259	40000	6	42348	42300	6	41056	39100	6	49417	30100	6	38686	38700	6	47265	34000	6	46316	46300	6	60125	42000	6	51429
O00186	Syntaxin-binding protein 3 OS=Homo sapiens OX=9606 GN=STXBP3 PE=1 SV=2	sp|O00186|STXB3_HUMAN	10	97955	110000	10	80991	85900	10	107987	122000	10	102915	106000	10	65520	71200	10	89293	78600	10	92490	92100	10	108837	118000	10	92697	74800	10	126603	139000	10	122708	141000	10	88061	94300	10	101220	98400	10	108723	103000	10	98650	104000	10	91116
O00193	Small acidic protein OS=Homo sapiens OX=9606 GN=SMAP PE=1 SV=1	sp|O00193|SMAP_HUMAN	1	26802	26800	1	20357	20400	1	43225	43200	1	25126	25100	1	12655	12700	1	19139	19100	1	14675	14700	1	17340	17300	1	21721	21700	1	29542	29500	1	19705	19700	1	35026	35000	1	27641	27600	1	20207	20200	1	19404	19400	1	28779
O00217	NADH dehydrogenase [ubiquinone] iron-sulfur protein 8, mitochondrial OS=Homo sapiens OX=9606 GN=NDUFS8 PE=1 SV=1	sp|O00217|NDUS8_HUMAN	6	202764	376000	6	112960	198000	6	180991	335000	6	144391	247000	6	90942	165000	6	162453	256000	6	104711	199000	6	165674	292000	6	135156	237000	6	211433	316000	6	131662	244000	6	147124	269000	6	156958	285000	6	123238	219000	6	131063	238000	6	248317
O00221	NF-kappa-B inhibitor epsilon OS=Homo sapiens OX=9606 GN=NFKBIE PE=1 SV=3	sp|O00221|IKBE_HUMAN	2	18780	18800	2	13614	3670	2	12174	12200	2	13251	13300	2	6508	6510	2	13932	13900	2	13892	10600	2	10142	10100	2	14835	14800	2	21413	21400	2	21245	21200	2	12963	10100	2	39750	39800	2	5029	5030	2	10662	10700	2	16876
O00232	26S proteasome non-ATPase regulatory subunit 12 OS=Homo sapiens OX=9606 GN=PSMD12 PE=1 SV=3	sp|O00232|PSD12_HUMAN	1	53120	53100	1	27235	27200	1	44796	44800	1	47478	47500	1	30401	30400	1	29917	29900	1	43225	43200	1	30920	30900	1	33126	33100	1	27328	27300	1	29133	29100	1	28171	28200	1	32343	32300	1	23573	23600	1	27959	28000	1	33125
O00244	Copper transport protein ATOX1 OS=Homo sapiens OX=9606 GN=ATOX1 PE=1 SV=1	sp|O00244|ATOX1_HUMAN	2	36753	36800	2	18948	18900	2	26969	27000	2	21545	21500	2	11553	11600	2	17172	16100	2	18842	18800	2	18598	18600	2	12728	12700	2	23110	23100	2	25622	25600	2	17349	17300	2	9685	9690	2	17407	17400	2	15748	15700	2	22707
O00264	Membrane-associated progesterone receptor component 1 OS=Homo sapiens OX=9606 GN=PGRMC1 PE=1 SV=3	sp|O00264|PGRC1_HUMAN	2	148509	297000	2	96204	192000	2	177203	354000	2	92737	185000	2	87912	176000	2	221765	444000	2	123140	246000	2	230524	461000	2	179215	358000	2	350983	702000	2	264480	529000	2	206358	413000	2	145771	292000	2	134777	270000	2	181366	363000	2	211046
O00273	DNA fragmentation factor subunit alpha OS=Homo sapiens OX=9606 GN=DFFA PE=1 SV=1	sp|O00273|DFFA_HUMAN	1	499	499	1	188	188	1	222	222	1	641	641	1	222	222	1	145	145	1	1132	1130	1	443	443	1	665	665	1	224	224	1	532	532	1	909	909	1	887	#N/A	1	332	332	1	997	997	1	521
O00273-2	Isoform DFF35 of DNA fragmentation factor subunit alpha OS=Homo sapiens OX=9606 GN=DFFA	sp|O00273-2|DFFA_HUMAN	1	10037	10000	1	3823	3820	1	10800	10800	1	2722	2720	1	3655	3650	1	5786	5790	1	3764	3760	1	6868	6870	1	2949	2950	1	6901	6900	1	6617	6620	1	8912	8910	1	10745	10700	1	4251	4250	1	7726	7730	1	5937
O00299	Chloride intracellular channel protein 1 OS=Homo sapiens OX=9606 GN=CLIC1 PE=1 SV=4	sp|O00299|CLIC1_HUMAN	13	2579213	3990000	13	1693152	2580000	13	3887611	6010000	13	2896753	4390000	13	1904942	2880000	13	3691846	5620000	13	2598361	3950000	13	3456939	5220000	13	2912586	4470000	13	2955988	4480000	13	2904313	4370000	13	2818531	4320000	13	2843696	4270000	13	2511348	3810000	13	3082580	4660000	13	3845167
O00303	Eukaryotic translation initiation factor 3 subunit F OS=Homo sapiens OX=9606 GN=EIF3F PE=1 SV=1	sp|O00303|EIF3F_HUMAN	16	586854	807000	16	430741	588000	16	884616	1120000	16	496885	736000	16	339171	478000	16	616025	870000	16	473512	687000	16	564400	720000	16	495441	702000	16	470437	687000	16	588006	769000	16	596932	855000	16	566936	727000	16	446830	654000	16	470690	650000	16	694343
O00399	Dynactin subunit 6 OS=Homo sapiens OX=9606 GN=DCTN6 PE=1 SV=1	sp|O00399|DCTN6_HUMAN	4	28459	12400	4	17649	17600	4	17317	12900	4	17899	17900	4	7818	7820	4	16691	16700	4	13314	13300	4	18224	18200	4	13744	13700	4	19171	19200	4	16042	16000	4	16329	16300	4	16140	16100	4	17384	17400	4	12892	3930	4	16405
O00400	Acetyl-coenzyme A transporter 1 OS=Homo sapiens OX=9606 GN=SLC33A1 PE=1 SV=1	sp|O00400|ACATN_HUMAN	2	95101	95100	2	22361	22400	2	35425	35400	2	68503	68500	2	47071	47100	2	53705	53700	2	52033	52000	2	18421	18400	2	61993	62000	2	29498	29500	2	15505	10900	2	25466	25500	2	49509	49500	2	59782	59800	2	20745	20700	2	66999
O00401	Neural Wiskott-Aldrich syndrome protein OS=Homo sapiens OX=9606 GN=WASL PE=1 SV=2	sp|O00401|WASL_HUMAN	4	89590	88500	4	48865	48600	4	122827	122000	4	61462	61500	4	20971	21000	4	101541	58900	4	52087	46700	4	45162	44900	4	37773	28300	4	100263	100000	4	43662	43700	4	89586	54300	4	55097	55100	4	43859	43900	4	59691	37900	4	68936
O00418	Eukaryotic elongation factor 2 kinase OS=Homo sapiens OX=9606 GN=EEF2K PE=1 SV=2	sp|O00418|EF2K_HUMAN	1	4085	4090	1	3248	#N/A	1	11506	11500	1	2716	#N/A	1	4064	4060	1	16382	16400	1	20599	20600	1	36645	36600	1	27994	28000	1	2878	2880	1	14852	14900	1	9641	9640	1	12645	12600	1	6839	6840	1	8529	8530	1	14123
O00422	Histone deacetylase complex subunit SAP18 OS=Homo sapiens OX=9606 GN=SAP18 PE=1 SV=1	sp|O00422|SAP18_HUMAN	2	54626	54600	2	41234	10800	2	52692	52700	2	28721	6740	2	24907	24900	2	31878	7770	2	22451	15700	2	50442	50400	2	25515	25500	2	35608	7770	2	21867	21900	2	32257	32300	2	27932	6530	2	22037	22000	2	34454	8580	2	39456
O00425	Insulin-like growth factor 2 mRNA-binding protein 3 OS=Homo sapiens OX=9606 GN=IGF2BP3 PE=1 SV=2	sp|O00425|IF2B3_HUMAN	3	67023	67000	3	55804	55800	3	60883	60900	3	56511	46600	3	35042	31900	3	85928	85900	3	40595	33300	3	70501	60600	3	59812	56500	3	58713	58700	3	47565	47600	3	70990	71000	3	70088	63800	3	65727	57400	3	53236	49300	3	66099
O00443	Phosphatidylinositol 4-phosphate 3-kinase C2 domain-containing subunit alpha OS=Homo sapiens OX=9606 GN=PIK3C2A PE=1 SV=2	sp|O00443|P3C2A_HUMAN	1	101365	101000	1	59237	#N/A	1	112836	113000	1	81711	#N/A	1	1680	1680	1	76968	#N/A	1	61690	#N/A	1	98457	98500	1	91033	#N/A	1	80399	#N/A	1	113661	114000	1	54481	#N/A	1	78715	#N/A	1	62280	#N/A	1	78930	#N/A	1	107573
O00461	Golgi integral membrane protein 4 OS=Homo sapiens OX=9606 GN=GOLIM4 PE=1 SV=1	sp|O00461|GOLI4_HUMAN	6	59121	45100	6	31762	31800	6	135806	108000	6	47479	41200	6	31184	31200	6	34070	34100	6	36297	36300	6	62616	47400	6	56625	56600	6	58170	58200	6	47064	35700	6	71629	71600	6	63683	49400	6	55911	55900	6	37881	32800	6	76795
O00471	Exocyst complex component 5 OS=Homo sapiens OX=9606 GN=EXOC5 PE=1 SV=1	sp|O00471|EXOC5_HUMAN	2	16718	16700	2	17514	17500	2	17911	17900	2	24773	24800	2	4036	#N/A	2	17751	8490	2	21162	21200	2	15248	15200	2	10710	8040	2	5550	3600	2	12251	12300	2	13317	#N/A	2	9654	2860	2	205751	206000	2	10935	10900	2	14577
O00483	Cytochrome c oxidase subunit NDUFA4 OS=Homo sapiens OX=9606 GN=NDUFA4 PE=1 SV=1	sp|O00483|NDUA4_HUMAN	2	37475	37500	2	53756	6300	2	104211	104000	2	85314	10200	2	9060	9060	2	64010	7890	2	42434	8730	2	122180	122000	2	53933	13400	2	53597	53600	2	76593	76600	2	27730	13100	2	83136	83100	2	94198	94200	2	88868	88900	2	51873
O00487	26S proteasome non-ATPase regulatory subunit 14 OS=Homo sapiens OX=9606 GN=PSMD14 PE=1 SV=1	sp|O00487|PSDE_HUMAN	12	391793	561000	12	277100	381000	12	368577	448000	12	304187	431000	12	192328	270000	12	299290	418000	12	283919	423000	12	310587	432000	12	269299	380000	12	327163	492000	12	333827	472000	12	264927	326000	12	273838	358000	12	299948	422000	12	247253	361000	12	351879
O00505	Importin subunit alpha-4 OS=Homo sapiens OX=9606 GN=KPNA3 PE=1 SV=2	sp|O00505|IMA4_HUMAN	4	100631	101000	4	76849	76800	4	186072	150000	4	120497	121000	4	62993	57300	4	133679	134000	4	86943	72200	4	142511	104000	4	108005	97500	4	129538	130000	4	130512	99800	4	62792	62800	4	102051	80300	4	96984	79300	4	103184	77700	4	170206
O00541	Pescadillo homolog OS=Homo sapiens OX=9606 GN=PES1 PE=1 SV=1	sp|O00541|PESC_HUMAN	1	1850	1850	1	1078	1080	1	2574	2570	1	6194	6190	1	2551	2550	1	3880	3880	1	3757	3760	1	4930	4930	1	4941	4940	1	4955	4960	1	2357	2360	1	7366	7370	1	6000	6000	1	1655	1660	1	1423	1420	1	3318
O00566	U3 small nucleolar ribonucleoprotein protein MPP10 OS=Homo sapiens OX=9606 GN=MPHOSPH10 PE=1 SV=2	sp|O00566|MPP10_HUMAN	1	13995	14000	1	9136	9140	1	18511	18500	1	3959	3960	1	14302	14300	1	5560	5560	1	6729	6730	1	11803	11800	1	2333	2330	1	7700	7700	1	8119	8120	1	2819	2820	1	6854	#N/A	1	8444	8440	1	10370	10400	1	5953
O00567	Nucleolar protein 56 OS=Homo sapiens OX=9606 GN=NOP56 PE=1 SV=4	sp|O00567|NOP56_HUMAN	23	275631	422000	23	282347	466000	23	521867	838000	23	235215	309000	23	166469	258000	23	369087	584000	23	253154	363000	23	355278	496000	23	202392	258000	23	398267	591000	23	252802	342000	23	332570	497000	23	296004	423000	23	192978	246000	23	260554	385000	23	460034
O00622	Protein CYR61 OS=Homo sapiens OX=9606 GN=CYR61 PE=1 SV=1	sp|O00622|CYR61_HUMAN	7	198185	141000	7	105980	106000	7	185944	181000	7	119689	91000	7	77021	77000	7	133923	108000	7	118633	118000	7	163307	125000	7	118872	96900	7	106096	88900	7	97810	92200	7	121160	96500	7	117943	110000	7	127611	128000	7	111618	110000	7	165767
O00629	Importin subunit alpha-3 OS=Homo sapiens OX=9606 GN=KPNA4 PE=1 SV=1	sp|O00629|IMA3_HUMAN	6	71900	112000	6	79016	121000	6	159014	240000	6	103910	157000	6	74331	96400	6	157584	261000	6	77013	121000	6	133859	227000	6	72684	113000	6	157997	260000	6	143848	244000	6	72863	96700	6	117578	197000	6	163915	255000	6	117502	192000	6	130548
O00767	Acyl-CoA desaturase OS=Homo sapiens OX=9606 GN=SCD PE=1 SV=2	sp|O00767|ACOD_HUMAN	1	5641	5640	1	6202	6200	1	4455	4450	1	5356	5360	1	4552	4550	1	5385	5380	1	4601	4600	1	7086	7090	1	12717	12700	1	5304	5300	1	8055	8060	1	12501	12500	1	5048	5050	1	4650	4650	1	7901	7900	1	5263
O14495	Phospholipid phosphatase 3 OS=Homo sapiens OX=9606 GN=PLPP3 PE=1 SV=1	sp|O14495|PLPP3_HUMAN	5	101780	41000	5	76191	94100	5	137455	156000	5	80572	95400	5	54266	48900	5	132475	149000	5	95931	125000	5	153642	95100	5	118178	78000	5	124879	151000	5	116678	86700	5	130546	154000	5	132304	148000	5	57671	77200	5	96920	115000	5	93500
O14498	Immunoglobulin superfamily containing leucine-rich repeat protein OS=Homo sapiens OX=9606 GN=ISLR PE=2 SV=1	sp|O14498|ISLR_HUMAN	2	8350	1730	2	13845	13800	2	6962	6960	2	11081	11100	2	6238	6240	2	33110	27500	2	8695	8700	2	26246	26200	2	10348	10300	2	9117	9120	2	9384	9380	2	17503	8510	2	7017	7020	2	52929	52900	2	55260	7020	2	49434
O14531	Dihydropyrimidinase-related protein 4 OS=Homo sapiens OX=9606 GN=DPYSL4 PE=1 SV=2	sp|O14531|DPYL4_HUMAN	2	157766	316000	2	116975	234000	2	156704	313000	2	127112	254000	2	108920	218000	2	154144	308000	2	156847	314000	2	207681	415000	2	155769	312000	2	167983	336000	2	171918	344000	2	180696	361000	2	160432	321000	2	127011	254000	2	142605	285000	2	160715
O14548	Cytochrome c oxidase subunit 7A-related protein, mitochondrial OS=Homo sapiens OX=9606 GN=COX7A2L PE=1 SV=2	sp|O14548|COX7R_HUMAN	1	1385	1390	1	2025	2030	1	13472	13500	1	3852	3850	1	10100	10100	1	4523	4520	1	2681	#N/A	1	12253	12300	1	2805	2810	1	2271	2270	1	5386	5390	1	3183	3180	1	3821	3820	1	4671	4670	1	12687	12700	1	14181
O14558	Heat shock protein beta-6 OS=Homo sapiens OX=9606 GN=HSPB6 PE=1 SV=2	sp|O14558|HSPB6_HUMAN	9	259028	475000	9	60516	105000	9	294696	540000	9	193185	364000	9	119011	224000	9	158085	291000	9	191439	364000	9	200685	361000	9	166265	311000	9	160027	296000	9	189684	356000	9	239738	458000	9	459564	867000	9	355541	673000	9	182145	337000	9	158786
O14562	Ubiquitin domain-containing protein UBFD1 OS=Homo sapiens OX=9606 GN=UBFD1 PE=1 SV=2	sp|O14562|UBFD1_HUMAN	5	193723	191000	5	36253	53200	5	324707	324000	5	239995	104000	5	32086	48900	5	101465	133000	5	145715	32300	5	258990	315000	5	50052	78100	5	162857	45700	5	54280	67100	5	43684	58600	5	45560	44400	5	77925	123000	5	139420	145000	5	83932
O14569	Cytochrome b561 domain-containing protein 2 OS=Homo sapiens OX=9606 GN=CYB561D2 PE=1 SV=1	sp|O14569|C56D2_HUMAN	1	2801	2800	1	1321	1320	1	5210	5210	1	1237	#N/A	1	1112	1110	1	2589	2590	1	1266	1270	1	1508	1510	1	4162	4160	1	1934	1930	1	2829	2830	1	4391	4390	1	1492	1490	1	4899	4900	1	5645	5650	1	625
O14613	Cdc42 effector protein 2 OS=Homo sapiens OX=9606 GN=CDC42EP2 PE=1 SV=1	sp|O14613|BORG1_HUMAN	3	38902	24500	3	33340	25600	3	56279	42200	3	44062	44100	3	36861	36900	3	27568	27600	3	26743	26700	3	53472	43800	3	38698	38700	3	46131	46100	3	58312	42800	3	30054	30100	3	45800	36000	3	28351	9210	3	33080	27400	3	49473
O14618	Copper chaperone for superoxide dismutase OS=Homo sapiens OX=9606 GN=CCS PE=1 SV=1	sp|O14618|CCS_HUMAN	4	58882	58900	4	41761	41800	4	53098	53100	4	82054	82100	4	56080	56100	4	48905	45200	4	72327	70600	4	65766	65800	4	63916	62500	4	49725	46800	4	55859	55900	4	39195	37000	4	41740	41700	4	57989	58000	4	41013	39600	4	69658
O14641	Segment polarity protein dishevelled homolog DVL-2 OS=Homo sapiens OX=9606 GN=DVL2 PE=1 SV=1	sp|O14641|DVL2_HUMAN	1	4968	4970	1	2344	2340	1	9860	9860	1	2855	2850	1	2469	2470	1	5846	#N/A	1	2655	2650	1	5262	5260	1	6196	#N/A	1	10059	10100	1	10380	10400	1	3244	3240	1	3394	3390	1	1337	1340	1	8818	8820	1	5852
O14656	Torsin-1A OS=Homo sapiens OX=9606 GN=TOR1A PE=1 SV=1	sp|O14656|TOR1A_HUMAN	3	100771	72500	3	70525	70500	3	109518	93000	3	53889	53900	3	34412	34400	3	93965	94000	3	48973	49000	3	101333	83900	3	88471	88500	3	57060	49400	3	88014	69500	3	88496	88500	3	76321	64100	3	61451	61500	3	93416	93400	3	89564
O14657	Torsin-1B OS=Homo sapiens OX=9606 GN=TOR1B PE=1 SV=2	sp|O14657|TOR1B_HUMAN	2	30495	30500	2	9450	7710	2	28494	28500	2	21730	21700	2	13500	13500	2	24465	24500	2	15844	15800	2	27972	28000	2	12460	11400	2	19400	19400	2	15121	15100	2	28304	28300	2	15964	13000	2	16500	14800	2	14927	14900	2	15429
O14672	Disintegrin and metalloproteinase domain-containing protein 10 OS=Homo sapiens OX=9606 GN=ADAM10 PE=1 SV=1	sp|O14672|ADA10_HUMAN	6	49462	55900	6	40681	36700	6	63681	73200	6	35205	13200	6	23400	11900	6	42320	37600	6	49938	36900	6	48979	39800	6	47558	19400	6	44030	42700	6	45847	48200	6	34197	17700	6	22921	14500	6	30981	34300	6	48605	41500	6	43556
O14678	ATP-binding cassette sub-family D member 4 OS=Homo sapiens OX=9606 GN=ABCD4 PE=1 SV=1	sp|O14678|ABCD4_HUMAN	2	30483	30500	2	22838	22800	2	34746	34700	2	14570	14600	2	8094	#N/A	2	21636	21600	2	31064	30800	2	21523	21500	2	17933	17900	2	21807	21800	2	22362	22400	2	11120	11100	2	6148	6150	2	23780	23800	2	15301	15300	2	17302
O14684	Prostaglandin E synthase OS=Homo sapiens OX=9606 GN=PTGES PE=1 SV=2	sp|O14684|PTGES_HUMAN	1	6758	6760	1	15992	#N/A	1	8835	8830	1	4131	4130	1	3207	#N/A	1	22945	#N/A	1	11136	#N/A	1	7212	7210	1	3830	3830	1	28936	28900	1	17629	#N/A	1	2812	#N/A	1	41574	41600	1	4671	4670	1	5599	5600	1	9155
O14734	Acyl-coenzyme A thioesterase 8 OS=Homo sapiens OX=9606 GN=ACOT8 PE=1 SV=1	sp|O14734|ACOT8_HUMAN	1	4942	#N/A	1	5290	#N/A	1	6908	6910	1	3966	3970	1	931	931	1	7052	7050	1	6096	6100	1	11039	11000	1	11203	11200	1	7047	7050	1	3888	3890	1	11135	#N/A	1	3432	3430	1	7503	7500	1	3571	3570	1	9933
O14737	Programmed cell death protein 5 OS=Homo sapiens OX=9606 GN=PDCD5 PE=1 SV=3	sp|O14737|PDCD5_HUMAN	1	11367	11400	1	7603	7600	1	20481	20500	1	13488	#N/A	1	665	665	1	10513	#N/A	1	9964	#N/A	1	18539	18500	1	6709	#N/A	1	6421	#N/A	1	13265	13300	1	7481	7480	1	19412	19400	1	14476	14500	1	12861	12900	1	14264
O14745	Na(+)/H(+) exchange regulatory cofactor NHE-RF1 OS=Homo sapiens OX=9606 GN=SLC9A3R1 PE=1 SV=4	sp|O14745|NHRF1_HUMAN	2	21439	21400	2	13660	13700	2	39819	39800	2	11612	11600	2	13924	13900	2	24450	24500	2	32937	32900	2	37796	37800	2	33360	33400	2	29810	29800	2	39861	39900	2	23296	23300	2	13311	13300	2	24851	24900	2	17252	17300	2	34282
O14773	Tripeptidyl-peptidase 1 OS=Homo sapiens OX=9606 GN=TPP1 PE=1 SV=2	sp|O14773|TPP1_HUMAN	1	30905	30900	1	20311	20300	1	69676	69700	1	26718	26700	1	20479	#N/A	1	26790	26800	1	41587	41600	1	47366	47400	1	28251	28300	1	35986	36000	1	34996	35000	1	38618	38600	1	44948	44900	1	27613	27600	1	33942	33900	1	38740
O14777	Kinetochore protein NDC80 homolog OS=Homo sapiens OX=9606 GN=NDC80 PE=1 SV=1	sp|O14777|NDC80_HUMAN	2	14833	14800	2	7998	4220	2	46631	46600	2	25088	25100	2	13394	13400	2	8189	7170	2	4256	1990	2	7167	7170	2	15296	11300	2	4019	2610	2	11329	11300	2	12338	#N/A	2	7808	5190	2	7625	7620	2	3054	#N/A	2	9961
O14786	Neuropilin-1 OS=Homo sapiens OX=9606 GN=NRP1 PE=1 SV=3	sp|O14786|NRP1_HUMAN	1	11210	11200	1	51246	51200	1	12857	12900	1	11592	11600	1	8754	8750	1	13133	13100	1	9972	9970	1	17835	17800	1	5105	5100	1	28003	28000	1	20356	20400	1	64965	65000	1	14796	14800	1	72030	72000	1	30989	31000	1	60348
O14802	DNA-directed RNA polymerase III subunit RPC1 OS=Homo sapiens OX=9606 GN=POLR3A PE=1 SV=2	sp|O14802|RPC1_HUMAN	2	18630	3700	2	6704	6700	2	28863	11000	2	14940	14900	2	5300	5300	2	7217	7220	2	7188	7190	2	14676	8490	2	8785	8780	2	7143	7140	2	7138	4810	2	3729	3730	2	11277	11300	2	12267	12300	2	12972	13000	2	9684
O14807	Ras-related protein M-Ras OS=Homo sapiens OX=9606 GN=MRAS PE=1 SV=2	sp|O14807|RASM_HUMAN	2	12258	12300	2	12064	12100	2	35888	35900	2	9384	5840	2	15819	15800	2	14603	14600	2	17004	17000	2	23800	23800	2	20275	20300	2	13743	9680	2	8794	8790	2	15286	15300	2	8328	#N/A	2	15453	15500	2	24653	24700	2	11755
O14817	Tetraspanin-4 OS=Homo sapiens OX=9606 GN=TSPAN4 PE=1 SV=1	sp|O14817|TSN4_HUMAN	1	11913	11900	1	14127	14100	1	16701	16700	1	18275	18300	1	15101	15100	1	16300	16300	1	8286	8290	1	20539	20500	1	23415	23400	1	20997	21000	1	18568	18600	1	10813	10800	1	7730	7730	1	11846	11800	1	13810	13800	1	12577
O14841	5-oxoprolinase OS=Homo sapiens OX=9606 GN=OPLAH PE=1 SV=3	sp|O14841|OPLA_HUMAN	4	40197	40200	4	42147	27900	4	46529	40200	4	37862	37900	4	19825	15400	4	48342	17400	4	25815	25800	4	37520	37500	4	33369	19300	4	40032	#N/A	4	53572	14500	4	46319	46300	4	70750	15500	4	38918	25800	4	31566	31600	4	59677
O14880	Microsomal glutathione S-transferase 3 OS=Homo sapiens OX=9606 GN=MGST3 PE=1 SV=1	sp|O14880|MGST3_HUMAN	3	110529	111000	3	52772	52800	3	151520	152000	3	129510	130000	3	76925	76900	3	164580	165000	3	154298	154000	3	166527	167000	3	151579	152000	3	163531	164000	3	153714	154000	3	139761	107000	3	176046	176000	3	195732	196000	3	130133	130000	3	166312
O14907	Tax1-binding protein 3 OS=Homo sapiens OX=9606 GN=TAX1BP3 PE=1 SV=2	sp|O14907|TX1B3_HUMAN	3	98076	83100	3	40520	25700	3	126357	78900	3	57450	40500	3	30382	26800	3	86748	64700	3	55750	41900	3	78218	48900	3	44499	44500	3	53379	53400	3	55149	27000	3	60832	60800	3	108511	67000	3	73322	42500	3	69012	39400	3	69841
O14908	PDZ domain-containing protein GIPC1 OS=Homo sapiens OX=9606 GN=GIPC1 PE=1 SV=2	sp|O14908|GIPC1_HUMAN	3	4841	14500	3	2600	7800	3	1215	3650	3	1338	4010	3	2267	6800	3	4089	12300	3	4957	14900	3	5895	17700	3	4522	13600	3	2442	7330	3	2734	8200	3	4292	12900	3	2121	6360	3	699	2100	3	2275	6830	3	2370
O14929	Histone acetyltransferase type B catalytic subunit OS=Homo sapiens OX=9606 GN=HAT1 PE=1 SV=1	sp|O14929|HAT1_HUMAN	2	41872	41900	2	6808	6810	2	37698	37700	2	53440	53400	2	40005	40000	2	53990	54000	2	15725	15700	2	71807	71800	2	40176	40200	2	9283	9280	2	43167	43200	2	65273	65300	2	15297	15300	2	60702	60700	2	14538	14500	2	58175
O14949	Cytochrome b-c1 complex subunit 8 OS=Homo sapiens OX=9606 GN=UQCRQ PE=1 SV=4	sp|O14949|QCR8_HUMAN	2	43820	87600	2	23994	#N/A	2	42942	#N/A	2	32155	#N/A	2	9801	19600	2	33471	66900	2	16348	#N/A	2	8669	#N/A	2	6512	13000	2	15414	#N/A	2	25608	#N/A	2	55012	110000	2	24269	48500	2	19101	#N/A	2	47125	#N/A	2	46114
O14957	Cytochrome b-c1 complex subunit 10 OS=Homo sapiens OX=9606 GN=UQCR11 PE=1 SV=1	sp|O14957|QCR10_HUMAN	1	36975	37000	1	4368	4370	1	25994	26000	1	8722	8720	1	6013	6010	1	12612	12600	1	6114	6110	1	8155	8150	1	6148	6150	1	9443	9440	1	17935	17900	1	8699	8700	1	9903	9900	1	7886	7890	1	5033	5030	1	5534
O14976	Cyclin-G-associated kinase OS=Homo sapiens OX=9606 GN=GAK PE=1 SV=2	sp|O14976|GAK_HUMAN	1	4198	#N/A	1	1886	1890	1	6326	#N/A	1	2647	2650	1	3257	3260	1	2360	2360	1	3453	3450	1	3055	3060	1	3541	3540	1	4005	4000	1	2782	#N/A	1	2624	2620	1	3365	3370	1	3213	3210	1	1847	1850	1	4697
O14980	Exportin-1 OS=Homo sapiens OX=9606 GN=XPO1 PE=1 SV=1	sp|O14980|XPO1_HUMAN	26	512636	649000	26	405391	439000	26	618045	728000	26	473206	572000	26	272075	346000	26	544612	694000	26	373041	468000	26	531743	642000	26	368588	420000	26	449268	574000	26	489777	635000	26	482523	549000	26	478213	575000	26	390115	436000	26	478168	516000	26	540291
O14981	TATA-binding protein-associated factor 172 OS=Homo sapiens OX=9606 GN=BTAF1 PE=1 SV=2	sp|O14981|BTAF1_HUMAN	4	20323	18500	4	17417	10900	4	27118	20200	4	16996	17000	4	7384	6610	4	18092	17000	4	16040	10900	4	10329	10300	4	13146	10300	4	10895	10900	4	11388	11400	4	19459	19500	4	13564	13600	4	11446	11400	4	19040	18000	4	17380
O15031	Plexin-B2 OS=Homo sapiens OX=9606 GN=PLXNB2 PE=1 SV=3	sp|O15031|PLXB2_HUMAN	26	282825	382000	26	166025	192000	26	394928	460000	26	232979	330000	26	131895	150000	26	272833	340000	26	306851	453000	26	211269	290000	26	217451	157000	26	250649	271000	26	260689	312000	26	238416	248000	26	210745	240000	26	208999	250000	26	236232	299000	26	216551
O15037	Protein KHNYN OS=Homo sapiens OX=9606 GN=KHNYN PE=1 SV=3	sp|O15037|KHNYN_HUMAN	1	4847	4850	1	3765	3770	1	11883	11900	1	2175	2180	1	7962	7960	1	9994	9990	1	2653	2650	1	4261	4260	1	5505	5510	1	9606	9610	1	3462	3460	1	8921	8920	1	7904	7900	1	6203	6200	1	12041	12000	1	8254
O15040	Tectonin beta-propeller repeat-containing protein 2 OS=Homo sapiens OX=9606 GN=TECPR2 PE=1 SV=4	sp|O15040|TCPR2_HUMAN	1	4909	4910	1	12012	12000	1	9279	9280	1	7438	7440	1	6780	6780	1	14224	14200	1	3043	3040	1	3366	3370	1	3726	3730	1	2884	2880	1	20198	20200	1	6607	6610	1	2890	2890	1	5197	5200	1	11099	11100	1	2407
O15047	Histone-lysine N-methyltransferase SETD1A OS=Homo sapiens OX=9606 GN=SETD1A PE=1 SV=3	sp|O15047|SET1A_HUMAN	1	1234	#N/A	1	1099	1100	1	1790	1790	1	1120	#N/A	1	337	337	1	443	443	1	1222	1220	1	1222	1220	1	1552	1550	1	886	886	1	715	715	1	551	551	1	997	997	1	402	#N/A	1	882	882	1	1090
O15063	Uncharacterized protein KIAA0355 OS=Homo sapiens OX=9606 GN=KIAA0355 PE=1 SV=2	sp|O15063|K0355_HUMAN	1	10277	10300	1	32831	#N/A	1	63417	#N/A	1	8508	8510	1	10590	10600	1	23873	#N/A	1	4563	4560	1	40671	#N/A	1	6400	6400	1	8184	8180	1	22988	23000	1	16594	16600	1	15485	15500	1	14128	14100	1	9096	9100	1	8410
O15066	Kinesin-like protein KIF3B OS=Homo sapiens OX=9606 GN=KIF3B PE=1 SV=1	sp|O15066|KIF3B_HUMAN	1	1828	1830	1	1085	#N/A	1	1388	1390	1	1448	1450	1	1579	1580	1	1497	1500	1	1199	1200	1	1972	1970	1	720	720	1	1832	1830	1	1056	1060	1	2782	2780	1	2622	2620	1	803	803	1	691	691	1	832
O15067	Phosphoribosylformylglycinamidine synthase OS=Homo sapiens OX=9606 GN=PFAS PE=1 SV=4	sp|O15067|PUR4_HUMAN	18	865036	945000	18	242032	238000	18	525860	603000	18	919838	899000	18	856985	861000	18	234962	216000	18	296750	307000	18	749151	787000	18	887971	883000	18	568248	583000	18	274899	247000	18	786265	816000	18	206763	191000	18	379926	357000	18	186375	161000	18	287670
O15111	Inhibitor of nuclear factor kappa-B kinase subunit alpha OS=Homo sapiens OX=9606 GN=CHUK PE=1 SV=2	sp|O15111|IKKA_HUMAN	4	21155	18300	4	25232	11700	4	25920	23300	4	22438	22400	4	12540	12500	4	22810	22800	4	17685	17700	4	22412	22400	4	12668	12700	4	18950	19000	4	21572	21600	4	32256	24100	4	24035	8280	4	23778	23800	4	21227	21200	4	36137
O15116	U6 snRNA-associated Sm-like protein LSm1 OS=Homo sapiens OX=9606 GN=LSM1 PE=1 SV=1	sp|O15116|LSM1_HUMAN	2	170212	157000	2	12458	12500	2	236074	236000	2	162971	163000	2	106858	107000	2	248525	249000	2	121741	122000	2	218434	218000	2	160375	160000	2	210566	211000	2	173498	174000	2	161407	161000	2	162941	163000	2	144219	144000	2	182383	182000	2	230954
O15121	Sphingolipid delta(4)-desaturase DES1 OS=Homo sapiens OX=9606 GN=DEGS1 PE=1 SV=1	sp|O15121|DEGS1_HUMAN	3	71412	132000	3	72588	139000	3	84375	161000	3	51044	95600	3	51213	96900	3	67787	130000	3	42165	80100	3	77126	150000	3	75516	145000	3	63053	114000	3	76483	144000	3	65003	125000	3	35921	62600	3	101522	190000	3	61960	115000	3	72296
O15126	Secretory carrier-associated membrane protein 1 OS=Homo sapiens OX=9606 GN=SCAMP1 PE=1 SV=2	sp|O15126|SCAM1_HUMAN	2	12819	12800	2	28901	28900	2	74364	74400	2	33669	33700	2	25356	25400	2	52822	52800	2	28440	28400	2	53756	53800	2	29195	29200	2	32579	32600	2	16236	16200	2	18239	18200	2	53269	52900	2	36743	36700	2	22821	22800	2	39439
O15127	Secretory carrier-associated membrane protein 2 OS=Homo sapiens OX=9606 GN=SCAMP2 PE=1 SV=2	sp|O15127|SCAM2_HUMAN	4	95123	187000	4	51976	103000	4	62983	120000	4	48017	94700	4	34882	68800	4	68002	1970	4	60650	119000	4	75936	148000	4	56935	112000	4	77328	153000	4	56800	112000	4	41886	81800	4	63802	127000	4	50433	99200	4	70883	140000	4	59605
O15143	Actin-related protein 2/3 complex subunit 1B OS=Homo sapiens OX=9606 GN=ARPC1B PE=1 SV=3	sp|O15143|ARC1B_HUMAN	17	693402	1130000	17	381051	560000	17	816513	1190000	17	566005	818000	17	382205	533000	17	680141	1010000	17	579554	860000	17	648350	955000	17	544833	796000	17	645374	948000	17	570989	868000	17	657020	953000	17	618818	872000	17	679425	1020000	17	606604	884000	17	693640
O15144	Actin-related protein 2/3 complex subunit 2 OS=Homo sapiens OX=9606 GN=ARPC2 PE=1 SV=1	sp|O15144|ARPC2_HUMAN	13	791973	860000	13	471567	382000	13	746352	729000	13	579348	505000	13	409196	349000	13	617419	526000	13	492884	477000	13	738414	834000	13	542317	406000	13	640669	603000	13	716792	824000	13	533650	492000	13	605261	581000	13	697472	535000	13	562253	553000	13	708666
O15145	Actin-related protein 2/3 complex subunit 3 OS=Homo sapiens OX=9606 GN=ARPC3 PE=1 SV=3	sp|O15145|ARPC3_HUMAN	8	899494	1630000	8	518321	934000	8	1198608	2130000	8	748806	1320000	8	490367	882000	8	907663	1670000	8	707089	1300000	8	882782	1560000	8	678827	1250000	8	840863	1520000	8	804303	1440000	8	771376	1400000	8	828529	1490000	8	945580	1700000	8	762930	1380000	8	930685
O15160	DNA-directed RNA polymerases I and III subunit RPAC1 OS=Homo sapiens OX=9606 GN=POLR1C PE=1 SV=1	sp|O15160|RPAC1_HUMAN	1	10160	10200	1	3396	3400	1	4852	4850	1	10125	10100	1	4474	4470	1	7935	7930	1	4090	4090	1	5318	5320	1	7606	7610	1	7034	7030	1	6888	6890	1	5101	5100	1	4042	4040	1	7030	7030	1	8928	8930	1	5526
O15212	Prefoldin subunit 6 OS=Homo sapiens OX=9606 GN=PFDN6 PE=1 SV=1	sp|O15212|PFD6_HUMAN	2	66244	66200	2	46884	13500	2	113000	113000	2	82721	34100	2	25108	19100	2	102326	38800	2	51908	21500	2	91406	91400	2	46362	16900	2	75736	36000	2	87635	87600	2	56453	30900	2	95575	95600	2	77699	77700	2	40841	40800	2	93343
O15213	WD repeat-containing protein 46 OS=Homo sapiens OX=9606 GN=WDR46 PE=1 SV=3	sp|O15213|WDR46_HUMAN	4	204631	10600	4	57901	17800	4	169226	167000	4	72816	16200	4	13693	13700	4	30399	30400	4	20223	20200	4	116011	115000	4	22054	18200	4	20828	15600	4	114327	16500	4	23140	23100	4	93596	12300	4	83625	83600	4	113964	19000	4	71650
O15228	Dihydroxyacetone phosphate acyltransferase OS=Homo sapiens OX=9606 GN=GNPAT PE=1 SV=1	sp|O15228|GNPAT_HUMAN	1	98887	98900	1	70377	70400	1	12615	#N/A	1	11437	11400	1	60496	#N/A	1	14928	14900	1	84431	84400	1	14927	14900	1	7712	7710	1	95648	#N/A	1	70824	70800	1	88105	88100	1	106252	106000	1	107955	108000	1	84848	84800	1	92115
O15239	NADH dehydrogenase [ubiquinone] 1 alpha subcomplex subunit 1 OS=Homo sapiens OX=9606 GN=NDUFA1 PE=1 SV=1	sp|O15239|NDUA1_HUMAN	2	22604	45200	2	5354	10700	2	27652	55300	2	4424	8850	2	2862	5720	2	13643	27300	2	18769	37500	2	13415	26800	2	17031	#N/A	2	3275	6550	2	11427	22900	2	8900	17800	2	16648	33300	2	14618	29200	2	16179	32400	2	20894
O15254	Peroxisomal acyl-coenzyme A oxidase 3 OS=Homo sapiens OX=9606 GN=ACOX3 PE=1 SV=2	sp|O15254|ACOX3_HUMAN	1	9656	9660	1	3724	#N/A	1	10689	#N/A	1	170562	171000	1	155400	155000	1	4614	#N/A	1	4719	4720	1	6657	6660	1	15136	15100	1	7112	#N/A	1	5706	#N/A	1	9587	9590	1	227887	228000	1	5209	5210	1	20492	20500	1	3130
O15258	Protein RER1 OS=Homo sapiens OX=9606 GN=RER1 PE=1 SV=1	sp|O15258|RER1_HUMAN	4	39389	39400	4	27749	25500	4	48076	48100	4	20601	20600	4	16231	5360	4	34849	15000	4	21194	14000	4	34606	34600	4	27777	27800	4	32423	23300	4	32180	32200	4	20473	3860	4	29146	29100	4	32402	32400	4	26454	13600	4	27262
O15269	Serine palmitoyltransferase 1 OS=Homo sapiens OX=9606 GN=SPTLC1 PE=1 SV=1	sp|O15269|SPTC1_HUMAN	4	86390	83800	4	35578	30500	4	126064	122000	4	65360	63000	4	31509	31500	4	74412	73900	4	70807	70800	4	67451	67500	4	59855	57300	4	69779	69800	4	55540	55500	4	63622	30200	4	68582	68600	4	83134	83100	4	47821	44900	4	86499
O15270	Serine palmitoyltransferase 2 OS=Homo sapiens OX=9606 GN=SPTLC2 PE=1 SV=1	sp|O15270|SPTC2_HUMAN	5	72672	53900	5	58341	50500	5	111250	81900	5	51385	50200	5	34859	34900	5	57811	54500	5	33377	25700	5	49235	40200	5	44451	42900	5	41357	20300	5	35896	30000	5	55208	54200	5	44334	33900	5	41747	40700	5	43601	36300	5	53593
O15294	UDP-N-acetylglucosamine--peptide N-acetylglucosaminyltransferase 110 kDa subunit OS=Homo sapiens OX=9606 GN=OGT PE=1 SV=3	sp|O15294|OGT1_HUMAN	1	6052	6050	1	11982	12000	1	2462	2460	1	1592	1590	1	2038	2040	1	2719	2720	1	3368	3370	1	3622	3620	1	3241	3240	1	18328	#N/A	1	3486	3490	1	5555	5560	1	5347	5350	1	7253	7250	1	1003	1000	1	4414
O15305	Phosphomannomutase 2 OS=Homo sapiens OX=9606 GN=PMM2 PE=1 SV=1	sp|O15305|PMM2_HUMAN	3	57072	50400	3	15023	15000	3	33724	25600	3	57422	57400	3	20908	18800	3	37372	35800	3	25920	18400	3	28800	28800	3	22294	22300	3	23941	20400	3	21890	14800	3	15697	12700	3	19027	7900	3	21983	22000	3	23387	18800	3	24037
O15347	High mobility group protein B3 OS=Homo sapiens OX=9606 GN=HMGB3 PE=1 SV=4	sp|O15347|HMGB3_HUMAN	2	16863	8340	2	20431	20400	2	53405	18800	2	30162	30200	2	9433	9430	2	40016	40000	2	38122	38100	2	83967	44800	2	51567	46700	2	37901	37900	2	58522	40200	2	49566	49600	2	65315	37800	2	49478	49500	2	32919	32900	2	50508
O15355	Protein phosphatase 1G OS=Homo sapiens OX=9606 GN=PPM1G PE=1 SV=1	sp|O15355|PPM1G_HUMAN	9	149875	220000	9	106775	150000	9	190591	267000	9	125712	160000	9	68397	94000	9	139308	188000	9	82711	109000	9	107523	140000	9	96208	141000	9	134366	205000	9	104691	132000	9	121286	167000	9	89883	117000	9	116687	179000	9	103642	149000	9	133747
O15357	Phosphatidylinositol 3,4,5-trisphosphate 5-phosphatase 2 OS=Homo sapiens OX=9606 GN=INPPL1 PE=1 SV=2	sp|O15357|SHIP2_HUMAN	2	29755	29800	2	9908	9910	2	27398	27400	2	6572	2550	2	8209	2340	2	20820	8070	2	16326	16300	2	18361	13100	2	14232	3210	2	17487	6690	2	18707	18700	2	27186	27200	2	21403	21400	2	17863	17900	2	20287	20300	2	21208
O15372	Eukaryotic translation initiation factor 3 subunit H OS=Homo sapiens OX=9606 GN=EIF3H PE=1 SV=1	sp|O15372|EIF3H_HUMAN	8	203617	223000	8	152152	280000	8	234913	349000	8	159207	84000	8	92495	57300	8	207325	63600	8	133122	231000	8	190687	271000	8	120913	211000	8	156092	78500	8	181794	321000	8	137059	66300	8	190078	79000	8	118539	203000	8	115070	157000	8	202368
O15397	Importin-8 OS=Homo sapiens OX=9606 GN=IPO8 PE=1 SV=2	sp|O15397|IPO8_HUMAN	3	14049	8900	3	11194	11200	3	23578	14100	3	10191	10200	3	6659	6660	3	22389	21600	3	45407	45400	3	14414	11500	3	68103	68100	3	33705	28000	3	10233	4180	3	12837	9850	3	5507	5510	3	5491	5490	3	16408	16400	3	13682
O15417	Trinucleotide repeat-containing gene 18 protein OS=Homo sapiens OX=9606 GN=TNRC18 PE=1 SV=3	sp|O15417|TNC18_HUMAN	1	9162	#N/A	1	11277	11300	1	25309	#N/A	1	15987	16000	1	6333	6330	1	9588	9590	1	16789	16800	1	11797	11800	1	2310	2310	1	7748	7750	1	7972	7970	1	4230	#N/A	1	5389	5390	1	12105	12100	1	6581	6580	1	3652
O15427	Monocarboxylate transporter 4 OS=Homo sapiens OX=9606 GN=SLC16A3 PE=1 SV=1	sp|O15427|MOT4_HUMAN	3	22098	22100	3	7310	7310	3	18761	13800	3	12730	9270	3	5760	2310	3	30349	30300	3	21236	19200	3	17791	17800	3	25824	20800	3	25270	17200	3	22290	22300	3	6286	3420	3	10905	10900	3	20226	18000	3	12667	9380	3	31366
O15460	Prolyl 4-hydroxylase subunit alpha-2 OS=Homo sapiens OX=9606 GN=P4HA2 PE=1 SV=1	sp|O15460|P4HA2_HUMAN	1	15040	15000	1	2590	2590	1	23780	23800	1	3410	3410	1	2632	2630	1	7883	7880	1	5811	5810	1	13939	13900	1	5447	5450	1	18230	18200	1	11509	11500	1	2183	2180	1	5353	5350	1	12686	12700	1	9212	9210	1	8963
O15460-2	Isoform IIa of Prolyl 4-hydroxylase subunit alpha-2 OS=Homo sapiens OX=9606 GN=P4HA2	sp|O15460-2|P4HA2_HUMAN	2	13199	26400	2	956	1910	2	17654	35300	2	1572	3140	2	5103	10200	2	10158	20300	2	2456	4910	2	18759	37500	2	9357	18700	2	26732	53500	2	16668	33300	2	1956	3910	2	9456	18900	2	22122	44200	2	13506	27000	2	8787
O15480	Melanoma-associated antigen B3 OS=Homo sapiens OX=9606 GN=MAGEB3 PE=2 SV=2	sp|O15480|MAGB3_HUMAN	1	5446	5450	1	2328	#N/A	1	4656	4660	1	3208	#N/A	1	1074	1070	1	7225	#N/A	1	3110	#N/A	1	5728	5730	1	3468	3470	1	3986	#N/A	1	4824	#N/A	1	6811	6810	1	5702	5700	1	2831	#N/A	1	2647	2650	1	4115
O15484	Calpain-5 OS=Homo sapiens OX=9606 GN=CAPN5 PE=1 SV=2	sp|O15484|CAN5_HUMAN	3	38134	37400	3	57484	57500	3	48272	48300	3	23787	23800	3	13078	13100	3	13387	13400	3	9555	9550	3	16495	2920	3	25946	25900	3	26106	26100	3	28851	28900	3	28780	28800	3	30872	30400	3	44407	44400	3	24249	23300	3	40872
O15511	Actin-related protein 2/3 complex subunit 5 OS=Homo sapiens OX=9606 GN=ARPC5 PE=1 SV=3	sp|O15511|ARPC5_HUMAN	2	31304	31300	2	41245	41200	2	60065	60100	2	26576	26600	2	27154	27200	2	64234	64200	2	28382	27900	2	28474	28500	2	33608	33600	2	27678	27700	2	44709	44700	2	47149	47100	2	37619	37600	2	27369	27100	2	26545	26500	2	44796
O15514	DNA-directed RNA polymerase II subunit RPB4 OS=Homo sapiens OX=9606 GN=POLR2D PE=1 SV=1	sp|O15514|RPB4_HUMAN	1	8075	8070	1	2963	2960	1	11305	11300	1	3477	3480	1	3324	3320	1	5863	5860	1	5514	5510	1	4890	4890	1	3117	3120	1	4458	4460	1	6475	6480	1	7741	7740	1	4801	4800	1	5704	5700	1	9169	9170	1	6272
O43143	Pre-mRNA-splicing factor ATP-dependent RNA helicase DHX15 OS=Homo sapiens OX=9606 GN=DHX15 PE=1 SV=2	sp|O43143|DHX15_HUMAN	23	498710	530000	23	241367	241000	23	636537	653000	23	483435	513000	23	237714	268000	23	467267	521000	23	318400	349000	23	414800	449000	23	392901	439000	23	441061	482000	23	377974	348000	23	483246	537000	23	346988	355000	23	316041	343000	23	363634	372000	23	537429
O43149	Zinc finger ZZ-type and EF-hand domain-containing protein 1 OS=Homo sapiens OX=9606 GN=ZZEF1 PE=1 SV=6	sp|O43149|ZZEF1_HUMAN	2	15103	15100	2	12598	12600	2	21649	21600	2	11917	11900	2	7737	#N/A	2	11510	11500	2	14465	14500	2	11798	11800	2	11377	11400	2	13487	2500	2	14628	14600	2	9979	2010	2	10824	10800	2	18784	18800	2	7011	7010	2	18886
O43159	Ribosomal RNA-processing protein 8 OS=Homo sapiens OX=9606 GN=RRP8 PE=1 SV=2	sp|O43159|RRP8_HUMAN	1	10560	10600	1	15308	15300	1	4051	4050	1	3746	#N/A	1	4481	4480	1	13448	13400	1	3279	3280	1	10447	10400	1	8388	8390	1	6189	6190	1	17157	17200	1	5235	5240	1	4292	4290	1	2892	#N/A	1	3940	3940	1	9887
O43169	Cytochrome b5 type B OS=Homo sapiens OX=9606 GN=CYB5B PE=1 SV=2	sp|O43169|CYB5B_HUMAN	3	147287	442000	3	100605	302000	3	213840	642000	3	139975	420000	3	72277	217000	3	145913	438000	3	126741	380000	3	148291	445000	3	125532	377000	3	124823	374000	3	173837	522000	3	164541	494000	3	170529	512000	3	136617	410000	3	132316	397000	3	147883
O43175	D-3-phosphoglycerate dehydrogenase OS=Homo sapiens OX=9606 GN=PHGDH PE=1 SV=4	sp|O43175|SERA_HUMAN	23	1556652	1950000	23	1085401	1310000	23	2130412	2700000	23	1100135	1420000	23	1779160	2150000	23	1993286	2630000	23	1600152	2100000	23	2187688	2880000	23	1346728	1530000	23	2187299	2960000	23	3137122	4030000	23	3335235	3920000	23	3356356	4430000	23	1593092	2120000	23	2146496	2810000	23	2873466
O43242	26S proteasome non-ATPase regulatory subunit 3 OS=Homo sapiens OX=9606 GN=PSMD3 PE=1 SV=2	sp|O43242|PSMD3_HUMAN	5	54351	71900	5	40105	49600	5	90972	92500	5	57311	75400	5	41134	56500	5	59657	74400	5	56770	76500	5	56520	67000	5	42011	50500	5	66075	85500	5	51742	67200	5	52041	61900	5	50880	62400	5	50267	63200	5	44791	57100	5	54587
O43252	Bifunctional 3'-phosphoadenosine 5'-phosphosulfate synthase 1 OS=Homo sapiens OX=9606 GN=PAPSS1 PE=1 SV=2	sp|O43252|PAPS1_HUMAN	13	187410	164000	13	122353	147000	13	206222	196000	13	216255	271000	13	98061	92600	13	194778	218000	13	162060	190000	13	215457	240000	13	186949	182000	13	180953	197000	13	184514	216000	13	183873	127000	13	152476	167000	13	158877	182000	13	121815	109000	13	209049
O43255	E3 ubiquitin-protein ligase SIAH2 OS=Homo sapiens OX=9606 GN=SIAH2 PE=1 SV=1	sp|O43255|SIAH2_HUMAN	1	3161	#N/A	1	7648	7650	1	10491	#N/A	1	3931	3930	1	4261	4260	1	7697	7700	1	5465	5460	1	10477	#N/A	1	7616	7620	1	3373	#N/A	1	8674	#N/A	1	5656	#N/A	1	5205	5200	1	4150	4150	1	4527	#N/A	1	4834
O43264	Centromere/kinetochore protein zw10 homolog OS=Homo sapiens OX=9606 GN=ZW10 PE=1 SV=3	sp|O43264|ZW10_HUMAN	2	28811	28800	2	19728	19700	2	27889	27900	2	28821	28800	2	13107	13100	2	21606	21600	2	10370	10400	2	27489	27500	2	15780	15800	2	20154	20200	2	34285	34300	2	15064	15100	2	15933	15900	2	14898	14900	2	20501	20500	2	24870
O43286	Beta-1,4-galactosyltransferase 5 OS=Homo sapiens OX=9606 GN=B4GALT5 PE=2 SV=1	sp|O43286|B4GT5_HUMAN	1	45246	45200	1	29503	29500	1	101215	101000	1	58204	58200	1	27931	27900	1	76673	76700	1	65395	65400	1	66605	66600	1	63903	63900	1	54818	54800	1	49238	49200	1	92417	92400	1	76312	76300	1	53231	53200	1	44080	44100	1	82896
O43290	U4/U6.U5 tri-snRNP-associated protein 1 OS=Homo sapiens OX=9606 GN=SART1 PE=1 SV=1	sp|O43290|SNUT1_HUMAN	7	99712	164000	7	70313	90500	7	158217	186000	7	99768	97400	7	47994	63500	7	87293	76600	7	74785	96900	7	66493	86400	7	74152	73500	7	74779	104000	7	77913	110000	7	85161	104000	7	83389	122000	7	86464	127000	7	88462	110000	7	86651
O43324	Eukaryotic translation elongation factor 1 epsilon-1 OS=Homo sapiens OX=9606 GN=EEF1E1 PE=1 SV=1	sp|O43324|MCA3_HUMAN	3	2176158	4350000	3	1295994	2590000	3	100790	194000	3	15541	28800	3	82763	163000	3	13851	5610	3	7265	13800	3	6798	11700	3	8177	13000	3	13144	21100	3	1293964	2590000	3	11200	21900	3	18246	33400	3	11154	20700	3	4559	8780	3	1470871
O43395	U4/U6 small nuclear ribonucleoprotein Prp3 OS=Homo sapiens OX=9606 GN=PRPF3 PE=1 SV=2	sp|O43395|PRPF3_HUMAN	5	76680	67500	5	53375	41000	5	182282	174000	5	75013	75000	5	77524	68000	5	117140	108000	5	114708	115000	5	106022	101000	5	118574	119000	5	126796	118000	5	109178	104000	5	107723	108000	5	84419	80400	5	54341	51600	5	114972	115000	5	106312
O43396	Thioredoxin-like protein 1 OS=Homo sapiens OX=9606 GN=TXNL1 PE=1 SV=3	sp|O43396|TXNL1_HUMAN	6	300448	300000	6	208948	195000	6	374702	358000	6	250940	238000	6	149870	150000	6	314071	304000	6	243162	144000	6	315479	304000	6	248835	249000	6	261923	257000	6	303978	290000	6	312900	309000	6	239740	228000	6	219236	219000	6	259296	259000	6	361418
O43488	Aflatoxin B1 aldehyde reductase member 2 OS=Homo sapiens OX=9606 GN=AKR7A2 PE=1 SV=3	sp|O43488|ARK72_HUMAN	9	115455	108000	9	52527	68600	9	153684	64800	9	88761	61800	9	39323	51000	9	206995	287000	9	109801	191000	9	182321	250000	9	139536	188000	9	126156	219000	9	98076	95900	9	129619	215000	9	142508	237000	9	168476	272000	9	69549	53100	9	53893
O43491	Band 4.1-like protein 2 OS=Homo sapiens OX=9606 GN=EPB41L2 PE=1 SV=1	sp|O43491|E41L2_HUMAN	1	7678	7680	1	3025	3020	1	2072	2070	1	1222	1220	1	5089	5090	1	6156	6160	1	4885	4890	1	6919	6920	1	7558	7560	1	6818	6820	1	1630	1630	1	7268	#N/A	1	4874	4870	1	1990	1990	1	6277	6280	1	2140
O43504	Ragulator complex protein LAMTOR5 OS=Homo sapiens OX=9606 GN=LAMTOR5 PE=1 SV=1	sp|O43504|LTOR5_HUMAN	4	101333	179000	4	49939	95200	4	98184	179000	4	64010	110000	4	54963	93600	4	71777	131000	4	64053	113000	4	75032	125000	4	90340	158000	4	90123	165000	4	94958	156000	4	89380	154000	4	84050	137000	4	86227	153000	4	62216	110000	4	72152
O43572	A-kinase anchor protein 10, mitochondrial OS=Homo sapiens OX=9606 GN=AKAP10 PE=1 SV=2	sp|O43572|AKA10_HUMAN	1	10521	10500	1	7758	7760	1	13640	13600	1	7403	#N/A	1	4241	#N/A	1	11516	11500	1	12510	12500	1	9674	#N/A	1	11550	11600	1	11981	12000	1	15317	15300	1	9443	9440	1	15230	15200	1	5344	5340	1	6088	#N/A	1	12356
O43583	Density-regulated protein OS=Homo sapiens OX=9606 GN=DENR PE=1 SV=2	sp|O43583|DENR_HUMAN	3	81488	81500	3	66991	67000	3	122007	122000	3	98630	98600	3	60736	34100	3	98485	98500	3	100790	39900	3	155534	156000	3	107800	108000	3	172538	173000	3	47967	48000	3	86188	63700	3	92647	92600	3	110619	111000	3	64360	64400	3	162073
O43592	Exportin-T OS=Homo sapiens OX=9606 GN=XPOT PE=1 SV=2	sp|O43592|XPOT_HUMAN	8	190639	160000	8	136089	136000	8	222522	223000	8	93950	64500	8	88434	85600	8	77118	51000	8	123354	123000	8	186117	132000	8	58651	50500	8	190816	184000	8	120355	120000	8	163767	157000	8	260153	209000	8	223983	178000	8	137783	138000	8	216111
O43598	2'-deoxynucleoside 5'-phosphate N-hydrolase 1 OS=Homo sapiens OX=9606 GN=DNPH1 PE=1 SV=1	sp|O43598|DNPH1_HUMAN	2	19347	38700	2	11953	23900	2	29167	58300	2	17409	34800	2	3901	7800	2	20644	41300	2	15585	31200	2	19817	39600	2	17553	35100	2	31525	63100	2	21756	43500	2	24719	49400	2	11923	23800	2	16277	32600	2	12688	25400	2	21660
O43615	Mitochondrial import inner membrane translocase subunit TIM44 OS=Homo sapiens OX=9606 GN=TIMM44 PE=1 SV=2	sp|O43615|TIM44_HUMAN	6	94249	92400	6	59713	59700	6	152849	153000	6	75235	67000	6	67880	62700	6	102863	103000	6	72420	62500	6	84194	82600	6	72880	72900	6	68320	64500	6	98021	97100	6	95466	81000	6	70135	70100	6	91335	90600	6	90370	66700	6	94307
O43633	Charged multivesicular body protein 2a OS=Homo sapiens OX=9606 GN=CHMP2A PE=1 SV=1	sp|O43633|CHM2A_HUMAN	1	7736	7740	1	95586	95600	1	160280	160000	1	59730	59700	1	1329	1330	1	91302	#N/A	1	2674	2670	1	110676	111000	1	72653	#N/A	1	3670	3670	1	8559	8560	1	5278	5280	1	199625	200000	1	93094	#N/A	1	127640	128000	1	98675
O43639	Cytoplasmic protein NCK2 OS=Homo sapiens OX=9606 GN=NCK2 PE=1 SV=2	sp|O43639|NCK2_HUMAN	1	11921	11900	1	4919	4920	1	12617	#N/A	1	6008	6010	1	3499	3500	1	3953	#N/A	1	4488	#N/A	1	8128	#N/A	1	5755	5750	1	3588	#N/A	1	9633	#N/A	1	6280	6280	1	8119	#N/A	1	8484	#N/A	1	7523	#N/A	1	12214
O43674	NADH dehydrogenase [ubiquinone] 1 beta subcomplex subunit 5, mitochondrial OS=Homo sapiens OX=9606 GN=NDUFB5 PE=1 SV=1	sp|O43674|NDUB5_HUMAN	1	34617	34600	1	16657	16700	1	15290	15300	1	2492	2490	1	388	388	1	1405	#N/A	1	7047	#N/A	1	11336	11300	1	997	997	1	1949	1950	1	7220	7220	1	7055	#N/A	1	13871	13900	1	16900	#N/A	1	1742	1740	1	5306
O43676	NADH dehydrogenase [ubiquinone] 1 beta subcomplex subunit 3 OS=Homo sapiens OX=9606 GN=NDUFB3 PE=1 SV=3	sp|O43676|NDUB3_HUMAN	2	23283	20700	2	26121	19600	2	20801	7780	2	19666	#N/A	2	13801	13800	2	18802	#N/A	2	10091	#N/A	2	19045	18100	2	8377	8380	2	8208	8210	2	22612	22600	2	10025	10000	2	21803	21800	2	12331	#N/A	2	16609	16600	2	30857
O43678	NADH dehydrogenase [ubiquinone] 1 alpha subcomplex subunit 2 OS=Homo sapiens OX=9606 GN=NDUFA2 PE=1 SV=3	sp|O43678|NDUA2_HUMAN	1	29186	29200	1	22642	22600	1	31599	31600	1	22965	23000	1	4994	4990	1	29582	29600	1	19427	19400	1	26053	26100	1	23711	23700	1	21285	21300	1	19326	19300	1	26303	26300	1	23554	23600	1	11319	11300	1	17057	17100	1	22098
O43681	ATPase ASNA1 OS=Homo sapiens OX=9606 GN=ASNA1 PE=1 SV=2	sp|O43681|ASNA_HUMAN	10	353842	392000	10	182840	146000	10	354251	373000	10	261878	287000	10	164892	189000	10	281835	322000	10	257740	286000	10	379142	306000	10	256875	277000	10	270939	292000	10	288722	312000	10	309019	324000	10	266028	292000	10	301670	252000	10	256955	276000	10	315464
O43707	Alpha-actinin-4 OS=Homo sapiens OX=9606 GN=ACTN4 PE=1 SV=2	sp|O43707|ACTN4_HUMAN	11	684996	1590000	11	452437	935000	11	1284493	2670000	11	858662	1690000	11	609059	1160000	11	1076783	2110000	11	773793	1460000	11	1050183	2030000	11	796263	1540000	11	758096	1460000	11	790195	1600000	11	813903	1610000	11	818658	1560000	11	973301	1890000	11	638842	1290000	11	1196904
O43716	Glutamyl-tRNA(Gln) amidotransferase subunit C, mitochondrial OS=Homo sapiens OX=9606 GN=GATC PE=1 SV=1	sp|O43716|GATC_HUMAN	4	48847	68600	4	40219	58300	4	39271	67900	4	47910	67200	4	33024	47300	4	54397	73800	4	47627	64800	4	57832	89200	4	51172	77500	4	51893	74800	4	47896	73400	4	53376	73400	4	38784	47100	4	53395	74100	4	42795	79600	4	50576
O43719	HIV Tat-specific factor 1 OS=Homo sapiens OX=9606 GN=HTATSF1 PE=1 SV=1	sp|O43719|HTSF1_HUMAN	2	22034	22000	2	10243	10200	2	17935	17900	2	7920	7920	2	6077	6080	2	23838	9610	2	9281	9280	2	19958	20000	2	8240	8240	2	14781	9280	2	29354	29400	2	14727	8430	2	18032	18000	2	6511	6510	2	17298	17300	2	16115
O43752	Syntaxin-6 OS=Homo sapiens OX=9606 GN=STX6 PE=1 SV=1	sp|O43752|STX6_HUMAN	1	8336	#N/A	1	1611	#N/A	1	7811	#N/A	1	1698	#N/A	1	919	#N/A	1	5781	5780	1	4230	4230	1	4316	4320	1	3078	3080	1	2001	2000	1	5284	#N/A	1	2974	2970	1	2426	2430	1	4152	4150	1	1174	1170	1	4787
O43765	Small glutamine-rich tetratricopeptide repeat-containing protein alpha OS=Homo sapiens OX=9606 GN=SGTA PE=1 SV=1	sp|O43765|SGTA_HUMAN	7	119812	111000	7	60874	60900	7	179669	139000	7	89506	82600	7	58768	54000	7	88182	79000	7	79030	79000	7	122436	116000	7	71649	56600	7	75302	75300	7	112693	85900	7	100164	95400	7	93257	73700	7	82351	82400	7	95488	71600	7	112010
O43772	Mitochondrial carnitine/acylcarnitine carrier protein OS=Homo sapiens OX=9606 GN=SLC25A20 PE=1 SV=1	sp|O43772|MCAT_HUMAN	4	283396	283000	4	147072	143000	4	276275	276000	4	35070	21100	4	166575	71900	4	256116	252000	4	138908	139000	4	31444	20500	4	226417	224000	4	258664	259000	4	41122	34300	4	233829	234000	4	78768	68200	4	36305	36300	4	282679	283000	4	396582
O43776	Asparagine--tRNA ligase, cytoplasmic OS=Homo sapiens OX=9606 GN=NARS PE=1 SV=1	sp|O43776|SYNC_HUMAN	12	485341	485000	12	353211	344000	12	510199	486000	12	397553	398000	12	345397	335000	12	432333	417000	12	518805	513000	12	588376	582000	12	462609	459000	12	547189	517000	12	584227	578000	12	602308	560000	12	567429	567000	12	470326	457000	12	519699	505000	12	586882
O43805	Sjoegren syndrome nuclear autoantigen 1 OS=Homo sapiens OX=9606 GN=SSNA1 PE=1 SV=2	sp|O43805|SSNA1_HUMAN	1	9704	9700	1	10025	10000	1	18667	18700	1	19187	19200	1	6309	6310	1	8244	8240	1	5190	5190	1	10662	10700	1	9210	9210	1	9927	9930	1	7133	7130	1	14472	14500	1	8844	8840	1	7221	7220	1	12710	12700	1	14789
O43809	Cleavage and polyadenylation specificity factor subunit 5 OS=Homo sapiens OX=9606 GN=NUDT21 PE=1 SV=1	sp|O43809|CPSF5_HUMAN	6	99530	108000	6	99865	105000	6	149353	174000	6	95842	95800	6	43079	43600	6	118953	135000	6	65737	71400	6	89757	96600	6	119788	126000	6	95583	113000	6	103010	112000	6	109911	116000	6	87771	95000	6	83238	91600	6	118260	119000	6	111707
O43813	LanC-like protein 1 OS=Homo sapiens OX=9606 GN=LANCL1 PE=1 SV=1	sp|O43813|LANC1_HUMAN	7	85887	93700	7	50347	66500	7	120401	148000	7	63263	60300	7	45745	28400	7	106919	97500	7	41405	7660	7	92460	111000	7	61153	78500	7	66920	63100	7	89239	118000	7	76233	77500	7	76787	96700	7	76692	84000	7	69440	79400	7	91070
O43818	U3 small nucleolar RNA-interacting protein 2 OS=Homo sapiens OX=9606 GN=RRP9 PE=1 SV=1	sp|O43818|U3IP2_HUMAN	2	11615	11600	2	8417	8420	2	5169	5170	2	8574	8570	2	2096	2100	2	10607	10600	2	3921	3920	2	10096	10100	2	4635	4640	2	6912	6910	2	12325	12300	2	9010	9010	2	3947	1720	2	2841	2840	2	9606	9610	2	4660
O43823	A-kinase anchor protein 8 OS=Homo sapiens OX=9606 GN=AKAP8 PE=1 SV=1	sp|O43823|AKAP8_HUMAN	1	8779	8780	1	2948	2950	1	12636	12600	1	7209	7210	1	2376	2380	1	11542	11500	1	6210	6210	1	12659	12700	1	3477	3480	1	15546	15500	1	3771	3770	1	2684	2680	1	6863	6860	1	2904	2900	1	7943	7940	1	11774
O43824	Putative GTP-binding protein 6 OS=Homo sapiens OX=9606 GN=GTPBP6 PE=2 SV=4	sp|O43824|GTPB6_HUMAN	2	15821	31600	2	11894	23800	2	35181	70400	2	9606	19200	2	9907	19800	2	26323	52600	2	16401	32800	2	30225	60500	2	11964	23900	2	10692	21400	2	28846	57700	2	29314	58600	2	30670	61300	2	38969	77900	2	8054	16100	2	30419
O43896	Kinesin-like protein KIF1C OS=Homo sapiens OX=9606 GN=KIF1C PE=1 SV=3	sp|O43896|KIF1C_HUMAN	1	4059	4060	1	3593	3590	1	12004	12000	1	5016	#N/A	1	1530	#N/A	1	2935	2930	1	2076	#N/A	1	2757	2760	1	8490	#N/A	1	2514	#N/A	1	10398	10400	1	5561	#N/A	1	2886	2890	1	3365	3370	1	2043	2040	1	7436
O43920	NADH dehydrogenase [ubiquinone] iron-sulfur protein 5 OS=Homo sapiens OX=9606 GN=NDUFS5 PE=1 SV=3	sp|O43920|NDUS5_HUMAN	2	25575	16700	2	13669	5370	2	33457	33500	2	7818	3390	2	8413	8410	2	15536	3540	2	12710	6570	2	28926	1950	2	10745	#N/A	2	12918	3380	2	36450	29600	2	11273	6420	2	50911	17100	2	20980	4920	2	25478	4700	2	29442
O43924	Retinal rod rhodopsin-sensitive cGMP 3',5'-cyclic phosphodiesterase subunit delta OS=Homo sapiens OX=9606 GN=PDE6D PE=1 SV=1	sp|O43924|PDE6D_HUMAN	3	23929	21500	3	26175	26200	3	37845	37800	3	30678	30700	3	27629	27600	3	26230	26200	3	25834	25800	3	54807	54800	3	24479	24500	3	47462	47500	3	29187	29200	3	24916	24900	3	20302	17200	3	28838	28800	3	39888	39900	3	24611
O60216	Double-strand-break repair protein rad21 homolog OS=Homo sapiens OX=9606 GN=RAD21 PE=1 SV=2	sp|O60216|RAD21_HUMAN	7	89978	90000	7	67683	67700	7	105589	91100	7	70316	70300	7	40300	21600	7	113496	64000	7	59246	59200	7	74171	74200	7	76640	49200	7	74908	51400	7	70673	70700	7	70141	23500	7	84318	84300	7	45548	45500	7	98241	98200	7	85176
O60220	Mitochondrial import inner membrane translocase subunit Tim8 A OS=Homo sapiens OX=9606 GN=TIMM8A PE=1 SV=1	sp|O60220|TIM8A_HUMAN	4	44319	44300	4	25891	25900	4	59966	60000	4	27517	27500	4	15918	15900	4	32151	17500	4	25481	13900	4	29203	22900	4	24669	24700	4	32244	21500	4	27084	27100	4	23663	17500	4	30106	30100	4	18638	18600	4	37535	37500	4	34316
O60231	Pre-mRNA-splicing factor ATP-dependent RNA helicase DHX16 OS=Homo sapiens OX=9606 GN=DHX16 PE=1 SV=2	sp|O60231|DHX16_HUMAN	4	23328	37400	4	26079	47100	4	41899	74800	4	42912	82000	4	10192	19200	4	35158	63100	4	22381	40800	4	32623	61700	4	10764	16900	4	19892	29000	4	14023	24600	4	33072	9060	4	18916	35000	4	25859	48600	4	33532	63500	4	34013
O60232	Sjoegren syndrome/scleroderma autoantigen 1 OS=Homo sapiens OX=9606 GN=SSSCA1 PE=1 SV=1	sp|O60232|SSA27_HUMAN	2	23037	#N/A	2	11457	5890	2	20627	20600	2	10654	5580	2	8653	8650	2	13044	13000	2	10130	10100	2	16896	3800	2	13618	13600	2	10189	10200	2	10509	10500	2	11847	11800	2	13297	5810	2	12958	13000	2	8652	8650	2	21525
O60244	Mediator of RNA polymerase II transcription subunit 14 OS=Homo sapiens OX=9606 GN=MED14 PE=1 SV=2	sp|O60244|MED14_HUMAN	1	18600	18600	1	13422	13400	1	13513	13500	1	7686	7690	1	8326	8330	1	20379	20400	1	12267	12300	1	18140	18100	1	12909	12900	1	13561	#N/A	1	15773	15800	1	16057	16100	1	16389	16400	1	6406	6410	1	13042	13000	1	29543
O60264	SWI/SNF-related matrix-associated actin-dependent regulator of chromatin subfamily A member 5 OS=Homo sapiens OX=9606 GN=SMARCA5 PE=1 SV=1	sp|O60264|SMCA5_HUMAN	4	56418	87300	4	34526	58600	4	90801	155000	4	86325	148000	4	36124	60600	4	62803	106000	4	49637	82600	4	26815	38400	4	63934	109000	4	68220	121000	4	65919	122000	4	83240	149000	4	52808	84900	4	55555	91900	4	39461	63200	4	64092
O60287	Nucleolar pre-ribosomal-associated protein 1 OS=Homo sapiens OX=9606 GN=URB1 PE=1 SV=4	sp|O60287|NPA1P_HUMAN	1	1674	#N/A	1	4504	#N/A	1	6080	6080	1	4122	4120	1	733	733	1	2675	2680	1	2042	#N/A	1	4706	4710	1	2271	2270	1	1445	1440	1	589	589	1	1972	1970	1	2242	#N/A	1	1782	1780	1	1867	#N/A	1	4870
O60306	RNA helicase aquarius OS=Homo sapiens OX=9606 GN=AQR PE=1 SV=4	sp|O60306|AQR_HUMAN	5	152687	128000	5	49484	43500	5	137015	105000	5	60870	52400	5	67496	55000	5	59400	39300	5	39337	17800	5	110833	111000	5	103282	73500	5	66774	26800	5	131247	106000	5	117517	97300	5	55260	38300	5	66416	35000	5	49176	32700	5	66399
O60333-3	Isoform 3 of Kinesin-like protein KIF1B OS=Homo sapiens OX=9606 GN=KIF1B	sp|O60333-3|KIF1B_HUMAN	1	35279	35300	1	13001	#N/A	1	77086	77100	1	27740	#N/A	1	7250	7250	1	21944	21900	1	18790	18800	1	37224	37200	1	29901	#N/A	1	22200	#N/A	1	49592	#N/A	1	14163	14200	1	51447	51400	1	17187	17200	1	32449	32400	1	33606
O60346	PH domain leucine-rich repeat-containing protein phosphatase 1 OS=Homo sapiens OX=9606 GN=PHLPP1 PE=1 SV=3	sp|O60346|PHLP1_HUMAN	1	55542	55500	1	14125	14100	1	33416	33400	1	15343	15300	1	8788	8790	1	36733	36700	1	9818	9820	1	15033	15000	1	9665	9670	1	5435	5440	1	7228	7230	1	16718	16700	1	8768	8770	1	13259	13300	1	7446	7450	1	7704
O60427	Fatty acid desaturase 1 OS=Homo sapiens OX=9606 GN=FADS1 PE=1 SV=3	sp|O60427|FADS1_HUMAN	1	20583	20600	1	11047	11000	1	12891	12900	1	7070	7070	1	7757	7760	1	16401	16400	1	8685	8680	1	9783	#N/A	1	14406	14400	1	15750	#N/A	1	13845	13800	1	6817	6820	1	4779	4780	1	8262	8260	1	4219	#N/A	1	14566
O60443	Gasdermin-E OS=Homo sapiens OX=9606 GN=GSDME PE=1 SV=2	sp|O60443|GSDME_HUMAN	3	25877	13500	3	15860	21100	3	19093	8910	3	13694	#N/A	3	6117	#N/A	3	17667	4130	3	15965	28500	3	32252	54500	3	16025	8300	3	23561	13600	3	13110	23100	3	16524	28200	3	6712	12100	3	12698	5040	3	8751	#N/A	3	11103
O60503	Adenylate cyclase type 9 OS=Homo sapiens OX=9606 GN=ADCY9 PE=1 SV=4	sp|O60503|ADCY9_HUMAN	4	374278	374000	4	62525	62500	4	353514	352000	4	323863	320000	4	404921	405000	4	192809	193000	4	404514	403000	4	292523	293000	4	300171	300000	4	334594	335000	4	317837	318000	4	426040	423000	4	232427	228000	4	357693	355000	4	205019	199000	4	326263
O60513	Beta-1,4-galactosyltransferase 4 OS=Homo sapiens OX=9606 GN=B4GALT4 PE=1 SV=1	sp|O60513|B4GT4_HUMAN	2	74246	3910	2	75735	75700	2	146518	147000	2	54392	54400	2	27587	6130	2	198348	8110	2	70802	#N/A	2	56650	53500	2	21378	21400	2	42412	42400	2	55395	14700	2	54366	#N/A	2	25919	23000	2	8948	2840	2	79494	79500	2	186595
O60518	Ran-binding protein 6 OS=Homo sapiens OX=9606 GN=RANBP6 PE=1 SV=2	sp|O60518|RNBP6_HUMAN	1	16669	16700	1	2454	2450	1	17337	17300	1	6378	6380	1	3501	3500	1	14780	14800	1	18166	18200	1	19841	19800	1	3554	3550	1	24105	24100	1	22907	22900	1	14933	14900	1	24420	24400	1	8096	8100	1	24468	24500	1	21161
O60565	Gremlin-1 OS=Homo sapiens OX=9606 GN=GREM1 PE=1 SV=1	sp|O60565|GREM1_HUMAN	1	25867	25900	1	11844	11800	1	36854	36900	1	14603	14600	1	10631	10600	1	13248	13200	1	24998	25000	1	24918	24900	1	13188	13200	1	28535	28500	1	17494	17500	1	17411	17400	1	12782	12800	1	20804	20800	1	11587	11600	1	9115
O60568	Procollagen-lysine,2-oxoglutarate 5-dioxygenase 3 OS=Homo sapiens OX=9606 GN=PLOD3 PE=1 SV=1	sp|O60568|PLOD3_HUMAN	30	1531936	1670000	30	872598	294000	30	1839491	725000	30	1196758	668000	30	405709	483000	30	1104036	679000	30	1056891	527000	30	1526182	770000	30	826303	616000	30	829421	762000	30	1571161	684000	30	694113	816000	30	1467168	780000	30	1360648	1360000	30	1285442	589000	30	1608216
O60573	Eukaryotic translation initiation factor 4E type 2 OS=Homo sapiens OX=9606 GN=EIF4E2 PE=1 SV=1	sp|O60573|IF4E2_HUMAN	1	6721	6720	1	4086	4090	1	3318	3320	1	1566	1570	1	742	742	1	3664	3660	1	1699	1700	1	9480	9480	1	7608	7610	1	960	960	1	1101	1100	1	2328	2330	1	3430	3430	1	2105	2110	1	951	951	1	2217
O60610	Protein diaphanous homolog 1 OS=Homo sapiens OX=9606 GN=DIAPH1 PE=1 SV=2	sp|O60610|DIAP1_HUMAN	1	6515	6510	1	5554	5550	1	25955	26000	1	13169	13200	1	7255	7250	1	21727	21700	1	13285	13300	1	36848	36800	1	19113	19100	1	46045	46000	1	32761	32800	1	10617	10600	1	1940	1940	1	6602	6600	1	15267	15300	1	50091
O60613	Selenoprotein F OS=Homo sapiens OX=9606 GN=SELENOF PE=1 SV=4	sp|O60613|SEP15_HUMAN	1	6747	6750	1	9517	9520	1	21829	21800	1	9116	9120	1	7927	7930	1	20584	20600	1	19548	19500	1	19459	19500	1	15947	15900	1	17607	17600	1	12490	12500	1	7082	7080	1	10796	10800	1	14806	14800	1	23493	23500	1	22781
O60684	Importin subunit alpha-7 OS=Homo sapiens OX=9606 GN=KPNA6 PE=1 SV=1	sp|O60684|IMA7_HUMAN	8	64454	63800	8	83620	108000	8	93192	101000	8	108071	138000	8	61575	75800	8	73977	92200	8	53272	59700	8	63128	72300	8	41732	42600	8	86742	98000	8	75164	95400	8	61303	53000	8	58011	67600	8	46802	53200	8	48106	50600	8	67109
O60704	Protein-tyrosine sulfotransferase 2 OS=Homo sapiens OX=9606 GN=TPST2 PE=1 SV=1	sp|O60704|TPST2_HUMAN	2	9689	9690	2	5010	5010	2	5203	1690	2	10133	10100	2	2030	1560	2	4016	2050	2	7127	5530	2	9741	9740	2	5092	5090	2	3275	3270	2	2728	2730	2	8527	7160	2	3197	3200	2	11664	3580	2	4316	#N/A	2	6490
O60725	Protein-S-isoprenylcysteine O-methyltransferase OS=Homo sapiens OX=9606 GN=ICMT PE=1 SV=1	sp|O60725|ICMT_HUMAN	1	3738	3740	1	3943	3940	1	2481	#N/A	1	3909	3910	1	1508	1510	1	4827	4830	1	4603	4600	1	2407	2410	1	2400	2400	1	4460	4460	1	2373	2370	1	3002	3000	1	1683	1680	1	1590	#N/A	1	9851	9850	1	2883
O60749	Sorting nexin-2 OS=Homo sapiens OX=9606 GN=SNX2 PE=1 SV=2	sp|O60749|SNX2_HUMAN	1	23664	23700	1	8405	8400	1	9035	#N/A	1	13075	13100	1	6509	6510	1	20582	20600	1	3941	3940	1	15820	15800	1	18728	18700	1	14036	#N/A	1	6217	#N/A	1	15081	15100	1	13073	13100	1	4613	#N/A	1	6607	6610	1	7912
O60762	Dolichol-phosphate mannosyltransferase subunit 1 OS=Homo sapiens OX=9606 GN=DPM1 PE=1 SV=1	sp|O60762|DPM1_HUMAN	5	89708	95300	5	58888	51100	5	105141	118000	5	45382	41300	5	30020	34300	5	86019	62500	5	31314	28100	5	99965	86500	5	48192	33700	5	62418	63800	5	89440	81500	5	89569	81600	5	96901	85500	5	73990	69700	5	65345	56700	5	46753
O60763	General vesicular transport factor p115 OS=Homo sapiens OX=9606 GN=USO1 PE=1 SV=2	sp|O60763|USO1_HUMAN	1	13942	13900	1	8761	8760	1	22101	22100	1	5541	5540	1	6573	6570	1	34049	34000	1	14488	14500	1	18198	18200	1	13794	13800	1	9772	#N/A	1	20185	20200	1	17583	17600	1	17134	17100	1	9912	9910	1	15686	15700	1	10264
O60783	28S ribosomal protein S14, mitochondrial OS=Homo sapiens OX=9606 GN=MRPS14 PE=1 SV=1	sp|O60783|RT14_HUMAN	2	12843	12800	2	18797	18800	2	29405	29400	2	17737	17700	2	6589	6590	2	19369	19400	2	13200	13200	2	16766	16800	2	19589	19600	2	19875	19900	2	19272	19300	2	21200	21100	2	19343	19300	2	4852	4850	2	17596	17600	2	19160
O60826	Coiled-coil domain-containing protein 22 OS=Homo sapiens OX=9606 GN=CCDC22 PE=1 SV=1	sp|O60826|CCD22_HUMAN	12	279225	274000	12	192901	119000	12	365780	258000	12	176797	75800	12	200305	209000	12	278592	152000	12	222686	221000	12	264943	154000	12	270651	264000	12	286939	262000	12	306779	302000	12	262419	257000	12	166588	203000	12	298858	274000	12	229288	245000	12	241180
O60831	PRA1 family protein 2 OS=Homo sapiens OX=9606 GN=PRAF2 PE=1 SV=1	sp|O60831|PRAF2_HUMAN	3	398329	448000	3	238126	265000	3	343584	378000	3	185846	229000	3	103520	127000	3	286093	322000	3	600022	633000	3	211774	239000	3	130605	152000	3	157977	201000	3	207320	238000	3	197880	227000	3	212404	241000	3	324379	374000	3	216078	241000	3	284625
O60841	Eukaryotic translation initiation factor 5B OS=Homo sapiens OX=9606 GN=EIF5B PE=1 SV=4	sp|O60841|IF2P_HUMAN	10	136033	96800	10	42758	57800	10	101053	137000	10	72817	51400	10	28605	29700	10	90582	53200	10	53124	72600	10	88477	110000	10	46318	18900	10	63537	67900	10	70234	91100	10	64735	76700	10	83543	23300	10	75203	101000	10	57041	71500	10	87075
O60884	DnaJ homolog subfamily A member 2 OS=Homo sapiens OX=9606 GN=DNAJA2 PE=1 SV=1	sp|O60884|DNJA2_HUMAN	5	41515	38700	5	35899	35900	5	68060	68100	5	65941	65900	5	28557	22800	5	51239	51200	5	55869	55900	5	51706	51700	5	34528	26200	5	63364	63400	5	52251	52300	5	51904	51900	5	48073	48100	5	24020	24000	5	39063	39100	5	52231
O60885	Bromodomain-containing protein 4 OS=Homo sapiens OX=9606 GN=BRD4 PE=1 SV=2	sp|O60885|BRD4_HUMAN	1	1683	1680	1	2532	2530	1	1883	1880	1	3097	3100	1	1314	#N/A	1	4774	4770	1	2220	2220	1	4088	4090	1	1705	1710	1	1766	1770	1	1365	1370	1	2995	2990	1	3859	3860	1	3509	3510	1	3689	3690	1	2362
O60925	Prefoldin subunit 1 OS=Homo sapiens OX=9606 GN=PFDN1 PE=1 SV=2	sp|O60925|PFD1_HUMAN	5	76715	130000	5	42456	63100	5	71977	122000	5	60298	98600	5	24137	42300	5	61539	94300	5	39917	63300	5	62256	107000	5	47787	87100	5	49151	75400	5	63560	108000	5	35528	57800	5	77892	137000	5	44774	75700	5	53393	88100	5	54655
O60927	E3 ubiquitin-protein ligase PPP1R11 OS=Homo sapiens OX=9606 GN=PPP1R11 PE=1 SV=1	sp|O60927|PP1RB_HUMAN	1	27503	27500	1	3188	3190	1	27539	27500	1	15336	15300	1	14234	#N/A	1	4625	4630	1	17853	#N/A	1	22331	22300	1	21102	21100	1	19626	#N/A	1	20169	20200	1	3424	3420	1	2017	2020	1	16094	16100	1	16870	16900	1	3608
O60934	Nibrin OS=Homo sapiens OX=9606 GN=NBN PE=1 SV=1	sp|O60934|NBN_HUMAN	2	8783	3950	2	3945	2130	2	6128	6130	2	4115	4110	2	2539	2540	2	10206	10200	2	4992	4990	2	8751	8750	2	7442	7440	2	3924	3920	2	6196	4430	2	5607	5610	2	5578	5580	2	6411	6410	2	10166	10200	2	5470
O75044	SLIT-ROBO Rho GTPase-activating protein 2 OS=Homo sapiens OX=9606 GN=SRGAP2 PE=1 SV=3	sp|O75044|SRGP2_HUMAN	4	40651	40700	4	15871	15900	4	63806	63800	4	61858	61900	4	46455	46500	4	51163	51200	4	43059	43100	4	30077	30100	4	16075	7930	4	45383	45400	4	61209	61200	4	25504	25500	4	62465	62500	4	50439	45700	4	19696	19700	4	78134
O75063	Glycosaminoglycan xylosylkinase OS=Homo sapiens OX=9606 GN=FAM20B PE=1 SV=1	sp|O75063|XYLK_HUMAN	3	204919	192000	3	117776	132000	3	130082	149000	3	108274	118000	3	80659	94500	3	99307	114000	3	100390	109000	3	130683	147000	3	91373	98700	3	133669	145000	3	128276	138000	3	128266	144000	3	83307	90800	3	85866	93800	3	122315	129000	3	157248
O75064	DENN domain-containing protein 4B OS=Homo sapiens OX=9606 GN=DENND4B PE=1 SV=4	sp|O75064|DEN4B_HUMAN	1	31202	31200	1	5013	5010	1	12920	12900	1	8968	8970	1	13932	13900	1	6002	6000	1	20192	20200	1	2438	2440	1	18599	18600	1	22621	22600	1	3500	#N/A	1	17498	17500	1	18317	18300	1	10768	10800	1	12592	12600	1	4665
O75083	WD repeat-containing protein 1 OS=Homo sapiens OX=9606 GN=WDR1 PE=1 SV=4	sp|O75083|WDR1_HUMAN	12	1401302	2540000	12	922828	1650000	12	1620174	2870000	12	1132306	2040000	12	797662	1430000	12	1430900	2560000	12	1081775	1930000	12	1413559	2540000	12	1084292	1950000	12	1207587	2150000	12	1211299	2170000	12	1151101	2060000	12	1288972	2290000	12	1528584	2710000	12	1143761	2060000	12	1421906
O75084	Frizzled-7 OS=Homo sapiens OX=9606 GN=FZD7 PE=1 SV=2	sp|O75084|FZD7_HUMAN	1	5943	#N/A	1	4149	4150	1	2884	#N/A	1	6604	6600	1	2488	2490	1	2430	#N/A	1	5113	5110	1	2827	2830	1	1621	#N/A	1	6587	6590	1	3044	3040	1	3424	3420	1	3217	3220	1	3527	3530	1	7517	7520	1	3776
O75113	NEDD4-binding protein 1 OS=Homo sapiens OX=9606 GN=N4BP1 PE=1 SV=4	sp|O75113|N4BP1_HUMAN	1	13498	13500	1	2120	2120	1	20644	20600	1	16446	16400	1	4764	4760	1	7436	7440	1	4222	4220	1	2583	2580	1	6659	6660	1	9339	9340	1	10723	10700	1	18423	18400	1	12574	12600	1	12959	13000	1	11499	11500	1	14333
O75116	Rho-associated protein kinase 2 OS=Homo sapiens OX=9606 GN=ROCK2 PE=1 SV=4	sp|O75116|ROCK2_HUMAN	11	137533	123000	11	65173	65200	11	130567	131000	11	87333	87300	11	70212	70200	11	105108	103000	11	101387	99700	11	135948	99900	11	65055	64400	11	125798	123000	11	92722	87100	11	105348	99200	11	109302	104000	11	97777	97800	11	97404	95600	11	130803
O75131	Copine-3 OS=Homo sapiens OX=9606 GN=CPNE3 PE=1 SV=1	sp|O75131|CPNE3_HUMAN	11	180556	155000	11	162963	177000	11	426105	410000	11	213629	200000	11	107990	87500	11	213044	196000	11	145551	140000	11	239627	228000	11	152964	135000	11	182634	193000	11	196722	192000	11	161352	135000	11	172392	177000	11	166082	169000	11	167879	163000	11	194502
O75151	Lysine-specific demethylase PHF2 OS=Homo sapiens OX=9606 GN=PHF2 PE=1 SV=4	sp|O75151|PHF2_HUMAN	2	9262	9260	2	6781	319	2	6670	6670	2	4281	4280	2	3405	3400	2	7756	7760	2	4760	4760	2	7001	503	2	5847	5850	2	8118	8120	2	5061	775	2	9068	9070	2	8500	222	2	5451	439	2	5075	328	2	11030
O75153	Clustered mitochondria protein homolog OS=Homo sapiens OX=9606 GN=CLUH PE=1 SV=2	sp|O75153|CLU_HUMAN	7	56510	50100	7	20588	17900	7	64944	64900	7	33508	33500	7	29441	29400	7	60505	56400	7	29904	23300	7	38502	38500	7	39618	36900	7	43081	40400	7	51326	51200	7	25952	24300	7	41787	41800	7	45927	45900	7	41083	36100	7	42405
O75165	DnaJ homolog subfamily C member 13 OS=Homo sapiens OX=9606 GN=DNAJC13 PE=1 SV=5	sp|O75165|DJC13_HUMAN	22	374199	272000	22	153925	131000	22	359169	253000	22	192311	178000	22	106761	99200	22	248895	199000	22	153268	121000	22	222313	210000	22	197518	114000	22	198098	174000	22	244175	196000	22	221877	183000	22	209018	186000	22	192299	208000	22	192292	198000	22	170597
O75175	CCR4-NOT transcription complex subunit 3 OS=Homo sapiens OX=9606 GN=CNOT3 PE=1 SV=1	sp|O75175|CNOT3_HUMAN	1	11526	11500	1	4026	4030	1	8723	8720	1	3606	#N/A	1	7056	7060	1	3862	3860	1	5486	5490	1	9770	#N/A	1	8127	8130	1	6588	6590	1	7102	7100	1	5416	5420	1	3085	3080	1	6454	6450	1	2608	2610	1	4905
O75306	NADH dehydrogenase [ubiquinone] iron-sulfur protein 2, mitochondrial OS=Homo sapiens OX=9606 GN=NDUFS2 PE=1 SV=2	sp|O75306|NDUS2_HUMAN	1	6412	6410	1	4206	4210	1	3666	#N/A	1	11768	11800	1	3143	3140	1	6547	6550	1	4269	4270	1	5800	5800	1	12239	12200	1	6416	6420	1	8043	8040	1	7087	7090	1	3610	3610	1	8329	8330	1	5981	5980	1	5407
O75312	Zinc finger protein ZPR1 OS=Homo sapiens OX=9606 GN=ZPR1 PE=1 SV=1	sp|O75312|ZPR1_HUMAN	4	72039	16900	4	31571	31600	4	50501	2150	4	36789	31300	4	24277	16900	4	43295	38200	4	31753	26500	4	32173	12400	4	27629	10600	4	38558	14300	4	40316	35600	4	38932	8670	4	17478	7570	4	35862	35900	4	39025	27800	4	45945
O75323	Protein NipSnap homolog 2 OS=Homo sapiens OX=9606 GN=NIPSNAP2 PE=1 SV=1	sp|O75323|NIPS2_HUMAN	1	8833	8830	1	5619	5620	1	23746	#N/A	1	5825	5830	1	4520	4520	1	6850	6850	1	12740	#N/A	1	21107	#N/A	1	3442	#N/A	1	8479	#N/A	1	6484	6480	1	6137	#N/A	1	26338	#N/A	1	14113	#N/A	1	6337	6340	1	8886
O75340	Programmed cell death protein 6 OS=Homo sapiens OX=9606 GN=PDCD6 PE=1 SV=1	sp|O75340|PDCD6_HUMAN	1	16032	16000	1	1343	#N/A	1	9872	#N/A	1	4152	4150	1	1071	1070	1	6547	6550	1	2862	#N/A	1	6843	6840	1	3660	3660	1	3801	3800	1	3813	3810	1	4671	4670	1	2148	2150	1	2903	#N/A	1	3339	#N/A	1	4214
O75348	V-type proton ATPase subunit G 1 OS=Homo sapiens OX=9606 GN=ATP6V1G1 PE=1 SV=3	sp|O75348|VATG1_HUMAN	1	85567	85600	1	49101	49100	1	90558	90600	1	56659	56700	1	39449	39400	1	70556	70600	1	74061	74100	1	75158	75200	1	78172	78200	1	62391	62400	1	75756	75800	1	87117	87100	1	49329	49300	1	106978	107000	1	75960	76000	1	76654
O75351	Vacuolar protein sorting-associated protein 4B OS=Homo sapiens OX=9606 GN=VPS4B PE=1 SV=2	sp|O75351|VPS4B_HUMAN	7	103983	70600	7	95802	93800	7	80619	60600	7	140714	141000	7	41242	41800	7	121051	120000	7	80198	81300	7	118240	114000	7	78899	77600	7	118124	117000	7	195824	176000	7	149180	148000	7	86624	85400	7	79159	79400	7	87581	71300	7	120036
O75356	Ectonucleoside triphosphate diphosphohydrolase 5 OS=Homo sapiens OX=9606 GN=ENTPD5 PE=1 SV=1	sp|O75356|ENTP5_HUMAN	1	4097	4100	1	2119	2120	1	14680	14700	1	3220	3220	1	7394	7390	1	11262	11300	1	6103	6100	1	1957	1960	1	12248	12200	1	11370	11400	1	9936	9940	1	12340	12300	1	5623	5620	1	11376	11400	1	4392	4390	1	3174
O75368	SH3 domain-binding glutamic acid-rich-like protein OS=Homo sapiens OX=9606 GN=SH3BGRL PE=1 SV=1	sp|O75368|SH3L1_HUMAN	5	119136	184000	5	92029	161000	5	180049	305000	5	102374	147000	5	84609	144000	5	191328	303000	5	133925	216000	5	201166	324000	5	125712	195000	5	172687	274000	5	128463	205000	5	141609	226000	5	183565	308000	5	251596	394000	5	149742	244000	5	163406
O75380	NADH dehydrogenase [ubiquinone] iron-sulfur protein 6, mitochondrial OS=Homo sapiens OX=9606 GN=NDUFS6 PE=1 SV=1	sp|O75380|NDUS6_HUMAN	1	6779	6780	1	9537	9540	1	2690	2690	1	5967	5970	1	822	822	1	2122	2120	1	4458	4460	1	2082	2080	1	3503	3500	1	9459	9460	1	4058	4060	1	2710	2710	1	1999	2000	1	5126	5130	1	4006	#N/A	1	18531
O75390	Citrate synthase, mitochondrial OS=Homo sapiens OX=9606 GN=CS PE=1 SV=2	sp|O75390|CISY_HUMAN	12	581584	661000	12	583974	636000	12	1228304	1460000	12	905455	1010000	12	303879	329000	12	993243	1090000	12	781916	899000	12	1057760	1170000	12	872948	962000	12	634353	747000	12	641866	717000	12	894381	1060000	12	727207	911000	12	484211	601000	12	570377	624000	12	1131131
O75391	Sperm-associated antigen 7 OS=Homo sapiens OX=9606 GN=SPAG7 PE=1 SV=2	sp|O75391|SPAG7_HUMAN	3	59022	59000	3	36552	36600	3	34591	34600	3	46879	46900	3	27463	27500	3	63995	64000	3	48747	48700	3	61999	62000	3	32956	33000	3	47894	47900	3	70515	70500	3	93336	93300	3	46320	46300	3	55124	55100	3	30199	30200	3	71319
O75396	Vesicle-trafficking protein SEC22b OS=Homo sapiens OX=9606 GN=SEC22B PE=1 SV=4	sp|O75396|SC22B_HUMAN	9	1310322	1350000	9	1115294	1140000	9	1302794	1370000	9	649777	700000	9	566581	589000	9	1353790	1390000	9	835735	861000	9	1244811	1300000	9	849761	881000	9	1074586	1120000	9	1208829	1260000	9	872663	914000	9	1137822	1220000	9	1350255	1440000	9	875312	917000	9	1111603
O75427	Leucine-rich repeat and calponin homology domain-containing protein 4 OS=Homo sapiens OX=9606 GN=LRCH4 PE=1 SV=2	sp|O75427|LRCH4_HUMAN	2	14686	14700	2	12838	12800	2	12712	12700	2	11407	11400	2	4503	2010	2	7940	6070	2	5422	3690	2	13335	13300	2	7529	7530	2	9175	9180	2	6285	6290	2	8282	8280	2	7500	7500	2	3332	3330	2	5918	5920	2	9628
O75436	Vacuolar protein sorting-associated protein 26A OS=Homo sapiens OX=9606 GN=VPS26A PE=1 SV=2	sp|O75436|VP26A_HUMAN	2	88240	88200	2	86398	86400	2	128004	112000	2	87755	87800	2	51202	51200	2	90771	83900	2	88426	88400	2	107015	107000	2	91112	91100	2	130956	131000	2	108181	102000	2	135362	135000	2	94241	94200	2	87977	88000	2	102405	102000	2	78099
O75439	Mitochondrial-processing peptidase subunit beta OS=Homo sapiens OX=9606 GN=PMPCB PE=1 SV=2	sp|O75439|MPPB_HUMAN	8	127625	180000	8	37486	54900	8	141972	185000	8	75899	108000	8	35475	44500	8	89148	103000	8	55398	70100	8	104410	150000	8	57788	64800	8	81835	82300	8	71949	97500	8	116810	145000	8	64278	91800	8	74620	112000	8	96814	143000	8	108109
O75475	PC4 and SFRS1-interacting protein OS=Homo sapiens OX=9606 GN=PSIP1 PE=1 SV=1	sp|O75475|PSIP1_HUMAN	5	28137	46800	5	26119	40600	5	38007	63300	5	23338	42600	5	19504	36400	5	29594	42800	5	23977	36300	5	19950	31500	5	18684	26100	5	21604	27700	5	16956	24500	5	18422	30100	5	28636	46800	5	18575	27900	5	23402	39100	5	24367
O75477	Erlin-1 OS=Homo sapiens OX=9606 GN=ERLIN1 PE=1 SV=1	sp|O75477|ERLN1_HUMAN	5	94346	57900	5	71817	44200	5	120862	121000	5	92850	71900	5	63636	59800	5	90088	69800	5	69413	69400	5	85646	69600	5	91050	83000	5	81492	81500	5	93388	77700	5	75807	75800	5	103801	84300	5	105258	81300	5	97932	97900	5	77040
O75489	NADH dehydrogenase [ubiquinone] iron-sulfur protein 3, mitochondrial OS=Homo sapiens OX=9606 GN=NDUFS3 PE=1 SV=1	sp|O75489|NDUS3_HUMAN	3	129003	129000	3	79806	79800	3	143192	143000	3	77024	51700	3	67925	67900	3	116850	117000	3	91971	92000	3	120217	120000	3	102469	102000	3	80555	54700	3	114860	115000	3	134089	134000	3	105086	105000	3	107945	108000	3	103180	103000	3	112390
O75503	Ceroid-lipofuscinosis neuronal protein 5 OS=Homo sapiens OX=9606 GN=CLN5 PE=1 SV=2	sp|O75503|CLN5_HUMAN	1	14080	14100	1	6269	#N/A	1	11846	11800	1	4764	#N/A	1	4719	4720	1	9874	9870	1	3784	3780	1	8955	8950	1	3228	#N/A	1	8696	8700	1	9263	9260	1	17983	18000	1	4307	4310	1	6106	6110	1	9873	9870	1	5306
O75529	TAF5-like RNA polymerase II p300/CBP-associated factor-associated factor 65 kDa subunit 5L OS=Homo sapiens OX=9606 GN=TAF5L PE=1 SV=1	sp|O75529|TAF5L_HUMAN	1	5022	5020	1	13326	13300	1	8432	8430	1	8192	8190	1	3391	3390	1	12177	12200	1	6508	6510	1	6070	6070	1	2486	2490	1	9148	9150	1	11661	11700	1	2944	2940	1	11394	11400	1	5115	5120	1	2055	2050	1	15950
O75531	Barrier-to-autointegration factor OS=Homo sapiens OX=9606 GN=BANF1 PE=1 SV=1	sp|O75531|BAF_HUMAN	6	194457	288000	6	150546	159000	6	241230	340000	6	180676	165000	6	61369	116000	6	265478	312000	6	110741	161000	6	235391	340000	6	143706	161000	6	142239	182000	6	164537	166000	6	106126	167000	6	207178	214000	6	146415	230000	6	186632	148000	6	287619
O75533	Splicing factor 3B subunit 1 OS=Homo sapiens OX=9606 GN=SF3B1 PE=1 SV=3	sp|O75533|SF3B1_HUMAN	23	195535	237000	23	195281	214000	23	307964	397000	23	289890	391000	23	135748	173000	23	263407	338000	23	172105	231000	23	249532	332000	23	190005	251000	23	213214	255000	23	213125	282000	23	236588	273000	23	243884	310000	23	195829	246000	23	191954	255000	23	234886
O75607	Nucleoplasmin-3 OS=Homo sapiens OX=9606 GN=NPM3 PE=1 SV=3	sp|O75607|NPM3_HUMAN	3	40762	8500	3	13335	13300	3	28045	28000	3	34809	14400	3	12570	12600	3	21329	21300	3	17379	15000	3	27616	7620	3	33050	33100	3	16062	13400	3	16738	8000	3	10057	10100	3	10540	10500	3	20271	20300	3	17593	17600	3	21420
O75643	U5 small nuclear ribonucleoprotein 200 kDa helicase OS=Homo sapiens OX=9606 GN=SNRNP200 PE=1 SV=2	sp|O75643|U520_HUMAN	26	390574	395000	26	315139	324000	26	469802	397000	26	369618	332000	26	155915	143000	26	398052	362000	26	282278	272000	26	492620	355000	26	348005	291000	26	298857	296000	26	335562	325000	26	336963	339000	26	326931	267000	26	297061	258000	26	375156	350000	26	555401
O75663	TIP41-like protein OS=Homo sapiens OX=9606 GN=TIPRL PE=1 SV=2	sp|O75663|TIPRL_HUMAN	1	4403	4400	1	1622	1620	1	5902	5900	1	1596	1600	1	2062	2060	1	1628	#N/A	1	3925	3920	1	3237	3240	1	3929	3930	1	3949	3950	1	3446	3450	1	3639	3640	1	5252	5250	1	1466	1470	1	2769	2770	1	3125
O75694	Nuclear pore complex protein Nup155 OS=Homo sapiens OX=9606 GN=NUP155 PE=1 SV=1	sp|O75694|NU155_HUMAN	1	23972	24000	1	26279	26300	1	20571	20600	1	5632	#N/A	1	7167	7170	1	32960	33000	1	16763	16800	1	22131	22100	1	21021	21000	1	18774	18800	1	23849	23800	1	20829	20800	1	14358	14400	1	18295	18300	1	15091	15100	1	24559
O75695	Protein XRP2 OS=Homo sapiens OX=9606 GN=RP2 PE=1 SV=4	sp|O75695|XRP2_HUMAN	2	36093	4390	2	15920	8540	2	9218	9220	2	9870	9870	2	22104	22100	2	19292	19300	2	8175	6660	2	9642	9640	2	9469	9470	2	14191	14200	2	4669	4670	2	10071	10100	2	11564	1610	2	9118	9120	2	19335	19300	2	12311
O75717	WD repeat and HMG-box DNA-binding protein 1 OS=Homo sapiens OX=9606 GN=WDHD1 PE=1 SV=1	sp|O75717|WDHD1_HUMAN	1	5729	5730	1	3330	#N/A	1	2422	2420	1	4125	#N/A	1	665	665	1	144690	145000	1	1357	1360	1	7849	7850	1	118573	119000	1	212908	213000	1	3320	3320	1	53368	53400	1	5231	5230	1	3668	3670	1	1752	#N/A	1	3830
O75718	Cartilage-associated protein OS=Homo sapiens OX=9606 GN=CRTAP PE=1 SV=1	sp|O75718|CRTAP_HUMAN	10	294862	295000	10	180715	181000	10	375965	376000	10	235195	233000	10	177008	177000	10	300987	301000	10	230971	231000	10	301704	302000	10	204049	204000	10	309540	297000	10	280689	281000	10	300118	293000	10	303793	304000	10	342053	342000	10	207382	207000	10	338386
O75792	Ribonuclease H2 subunit A OS=Homo sapiens OX=9606 GN=RNASEH2A PE=1 SV=2	sp|O75792|RNH2A_HUMAN	2	3405	3400	2	1271	1270	2	12711	12700	2	3086	3090	2	824	824	2	2666	2670	2	2455	2460	2	2212	2210	2	2280	2280	2	3083	3080	2	2695	2690	2	2230	2230	2	4873	2160	2	2056	2060	2	2413	2410	2	3232
O75794	Cell division cycle protein 123 homolog OS=Homo sapiens OX=9606 GN=CDC123 PE=1 SV=1	sp|O75794|CD123_HUMAN	1	9402	9400	1	11109	11100	1	49886	#N/A	1	7863	7860	1	6850	6850	1	4399	#N/A	1	11827	11800	1	26762	#N/A	1	3634	3630	1	9028	9030	1	23144	#N/A	1	7905	#N/A	1	14915	14900	1	6772	6770	1	11303	11300	1	8626
O75817	Ribonuclease P protein subunit p20 OS=Homo sapiens OX=9606 GN=POP7 PE=1 SV=2	sp|O75817|POP7_HUMAN	1	31884	31900	1	7412	7410	1	15250	15300	1	7008	7010	1	10689	10700	1	14047	14000	1	8182	8180	1	10909	10900	1	14558	14600	1	10722	10700	1	11545	11500	1	19498	19500	1	14383	14400	1	12058	12100	1	6977	6980	1	10594
O75821	Eukaryotic translation initiation factor 3 subunit G OS=Homo sapiens OX=9606 GN=EIF3G PE=1 SV=2	sp|O75821|EIF3G_HUMAN	2	10414	5080	2	2684	2680	2	5649	5650	2	6714	6710	2	3482	3480	2	24181	24200	2	18324	18300	2	26110	26100	2	17470	16800	2	7066	7070	2	4405	4410	2	22482	22500	2	17766	17800	2	3737	3740	2	17149	17100	2	4509
O75828	Carbonyl reductase [NADPH] 3 OS=Homo sapiens OX=9606 GN=CBR3 PE=1 SV=3	sp|O75828|CBR3_HUMAN	11	364603	376000	11	369444	497000	11	485525	491000	11	225711	308000	11	260943	299000	11	435940	511000	11	344503	420000	11	253829	259000	11	363933	383000	11	400342	420000	11	225091	322000	11	443843	477000	11	189655	241000	11	192627	227000	11	274025	327000	11	421009
O75843	AP-1 complex subunit gamma-like 2 OS=Homo sapiens OX=9606 GN=AP1G2 PE=1 SV=1	sp|O75843|AP1G2_HUMAN	1	7261	7260	1	4506	#N/A	1	3254	#N/A	1	3293	3290	1	1384	1380	1	2493	#N/A	1	1934	1930	1	10412	10400	1	4137	4140	1	12763	#N/A	1	1573	#N/A	1	8274	#N/A	1	10461	10500	1	2548	2550	1	6727	6730	1	11230
O75844	CAAX prenyl protease 1 homolog OS=Homo sapiens OX=9606 GN=ZMPSTE24 PE=1 SV=2	sp|O75844|FACE1_HUMAN	5	84249	70200	5	70775	90000	5	111178	109000	5	89645	104000	5	55164	35700	5	53906	66200	5	70604	58600	5	86434	106000	5	88857	102000	5	103237	82900	5	64411	79600	5	102770	109000	5	86790	113000	5	95813	80400	5	82487	96900	5	111507
O75874	Isocitrate dehydrogenase [NADP] cytoplasmic OS=Homo sapiens OX=9606 GN=IDH1 PE=1 SV=2	sp|O75874|IDHC_HUMAN	15	467182	462000	15	216753	208000	15	512236	504000	15	343965	330000	15	207613	176000	15	472512	462000	15	255853	256000	15	431247	410000	15	324905	317000	15	340986	317000	15	379015	364000	15	446061	381000	15	357071	343000	15	431003	422000	15	334076	313000	15	408999
O75879	Glutamyl-tRNA(Gln) amidotransferase subunit B, mitochondrial OS=Homo sapiens OX=9606 GN=GATB PE=1 SV=1	sp|O75879|GATB_HUMAN	1	55351	55400	1	34230	34200	1	67118	67100	1	35764	35800	1	22930	22900	1	62711	62700	1	13148	13100	1	42614	42600	1	31700	31700	1	35579	35600	1	36204	36200	1	6888	6890	1	45228	45200	1	39351	39400	1	46668	46700	1	41798
O75880	Protein SCO1 homolog, mitochondrial OS=Homo sapiens OX=9606 GN=SCO1 PE=1 SV=1	sp|O75880|SCO1_HUMAN	1	5742	5740	1	1888	1890	1	3549	3550	1	4044	4040	1	1772	1770	1	3418	#N/A	1	1717	1720	1	2770	2770	1	1451	1450	1	4268	4270	1	4572	4570	1	1142	1140	1	2263	2260	1	2287	2290	1	1476	1480	1	3665
O75884	Putative hydrolase RBBP9 OS=Homo sapiens OX=9606 GN=RBBP9 PE=1 SV=2	sp|O75884|RBBP9_HUMAN	1	2921	2920	1	844	844	1	2909	2910	1	1240	1240	1	457	457	1	1670	#N/A	1	1337	1340	1	1349	1350	1	796	796	1	797	#N/A	1	1075	1070	1	1050	1050	1	866	866	1	629	629	1	575	575	1	373
O75886	Signal transducing adapter molecule 2 OS=Homo sapiens OX=9606 GN=STAM2 PE=1 SV=1	sp|O75886|STAM2_HUMAN	2	97656	97700	2	22797	2240	2	62461	21000	2	15543	#N/A	2	13508	9550	2	23048	11100	2	52291	52300	2	78723	78700	2	15463	15500	2	88635	88600	2	56082	51600	2	79585	79600	2	20306	#N/A	2	25475	#N/A	2	19478	4980	2	102526
O75896	Tumor suppressor candidate 2 OS=Homo sapiens OX=9606 GN=TUSC2 PE=1 SV=3	sp|O75896|TUSC2_HUMAN	1	14068	14100	1	13091	13100	1	26318	26300	1	21592	21600	1	8266	8270	1	23532	23500	1	14197	14200	1	22206	22200	1	15245	15200	1	20745	#N/A	1	15783	15800	1	25936	25900	1	18914	18900	1	4968	4970	1	5677	5680	1	16444
O75915	PRA1 family protein 3 OS=Homo sapiens OX=9606 GN=ARL6IP5 PE=1 SV=1	sp|O75915|PRAF3_HUMAN	5	130707	201000	5	223394	362000	5	187707	273000	5	221381	349000	5	161180	256000	5	208149	290000	5	205879	308000	5	191719	289000	5	166379	254000	5	229852	357000	5	225559	329000	5	157159	234000	5	291888	375000	5	337081	449000	5	179510	263000	5	209968
O75934	Pre-mRNA-splicing factor SPF27 OS=Homo sapiens OX=9606 GN=BCAS2 PE=1 SV=1	sp|O75934|SPF27_HUMAN	4	91204	91200	4	32809	32800	4	80191	40800	4	58052	43500	4	58285	58300	4	132066	99200	4	25437	11300	4	100335	100000	4	66293	66300	4	36574	12700	4	68387	65100	4	65923	52400	4	33417	32500	4	75487	73500	4	21628	21600	4	100213
O75937	DnaJ homolog subfamily C member 8 OS=Homo sapiens OX=9606 GN=DNAJC8 PE=1 SV=2	sp|O75937|DNJC8_HUMAN	1	20802	20800	1	17198	17200	1	43943	43900	1	21371	21400	1	8959	8960	1	33932	33900	1	21307	21300	1	20696	20700	1	17205	17200	1	20886	20900	1	24990	25000	1	22173	22200	1	19400	19400	1	10862	10900	1	23462	23500	1	33206
O75940	Survival of motor neuron-related-splicing factor 30 OS=Homo sapiens OX=9606 GN=SMNDC1 PE=1 SV=1	sp|O75940|SPF30_HUMAN	2	22719	22700	2	11610	11600	2	29364	12300	2	16688	10800	2	12159	12200	2	19845	#N/A	2	10316	10300	2	21511	21500	2	18638	14100	2	24930	18800	2	15976	16000	2	15074	15100	2	15731	15700	2	13398	7720	2	22266	22300	2	26934
O75955	Flotillin-1 OS=Homo sapiens OX=9606 GN=FLOT1 PE=1 SV=3	sp|O75955|FLOT1_HUMAN	2	18152	36300	2	7127	14300	2	23310	#N/A	2	14885	29800	2	11268	22500	2	15980	32000	2	9242	18500	2	12505	25000	2	17273	34500	2	21095	42200	2	10757	21500	2	14055	28100	2	11409	22800	2	16920	33800	2	21987	#N/A	2	20600
O75964	ATP synthase subunit g, mitochondrial OS=Homo sapiens OX=9606 GN=ATP5L PE=1 SV=3	sp|O75964|ATP5L_HUMAN	3	107679	108000	3	120472	120000	3	154670	155000	3	123396	123000	3	66702	66700	3	147585	148000	3	126620	127000	3	160094	160000	3	144664	145000	3	127456	127000	3	134727	135000	3	145428	145000	3	112067	112000	3	197927	198000	3	146687	147000	3	171284
O75976	Carboxypeptidase D OS=Homo sapiens OX=9606 GN=CPD PE=1 SV=2	sp|O75976|CBPD_HUMAN	2	8781	8780	2	5812	5810	2	20142	20100	2	7435	7440	2	16033	222	2	18555	#N/A	2	11905	11100	2	5254	5250	2	17071	17100	2	20819	381	2	9139	9140	2	13965	14000	2	16253	16300	2	15555	15600	2	25022	25000	2	12557
O76003	Glutaredoxin-3 OS=Homo sapiens OX=9606 GN=GLRX3 PE=1 SV=2	sp|O76003|GLRX3_HUMAN	8	112470	117000	8	86658	44900	8	214237	108000	8	60186	35200	8	27502	31500	8	86554	78100	8	37537	46300	8	113553	33300	8	62630	80200	8	56718	74700	8	104374	69200	8	49869	57200	8	95950	40600	8	113164	94800	8	91118	68600	8	96748
O76011	Keratin, type I cuticular Ha4 OS=Homo sapiens OX=9606 GN=KRT34 PE=1 SV=2	sp|O76011|KRT34_HUMAN	1	3140	3140	1	22810	22800	1	4325	4320	1	2502	2500	1	784	784	1	2411	2410	1	1341	1340	1	4015	4020	1	1453	1450	1	2360	#N/A	1	5733	#N/A	1	3641	3640	1	4916	#N/A	1	784	784	1	23947	23900	1	5942
O76021	Ribosomal L1 domain-containing protein 1 OS=Homo sapiens OX=9606 GN=RSL1D1 PE=1 SV=3	sp|O76021|RL1D1_HUMAN	7	113653	93000	7	76163	63400	7	132709	126000	7	121320	118000	7	69842	51500	7	99027	90700	7	99433	99400	7	123288	119000	7	97351	97400	7	111192	86100	7	62346	62300	7	100098	65500	7	113596	105000	7	105988	101000	7	51338	51300	7	140111
O76024	Wolframin OS=Homo sapiens OX=9606 GN=WFS1 PE=1 SV=2	sp|O76024|WFS1_HUMAN	2	26042	26000	2	10363	10400	2	34051	34100	2	26565	26600	2	21046	21000	2	24602	24600	2	14073	14100	2	39055	39100	2	31267	31300	2	38130	38100	2	12084	12100	2	28615	28600	2	41327	41300	2	20620	20600	2	8061	8060	2	30393
O76031	ATP-dependent Clp protease ATP-binding subunit clpX-like, mitochondrial OS=Homo sapiens OX=9606 GN=CLPX PE=1 SV=2	sp|O76031|CLPX_HUMAN	8	206648	207000	8	99761	89900	8	205285	184000	8	118603	119000	8	101604	102000	8	69089	57600	8	141572	138000	8	224040	217000	8	118464	106000	8	156708	157000	8	141311	141000	8	166323	166000	8	151439	137000	8	208685	202000	8	146783	140000	8	160009
O76071	Probable cytosolic iron-sulfur protein assembly protein CIAO1 OS=Homo sapiens OX=9606 GN=CIAO1 PE=1 SV=1	sp|O76071|CIAO1_HUMAN	5	71903	100000	5	24844	32200	5	45974	63900	5	49033	66800	5	26517	30200	5	66759	96800	5	35265	58900	5	50226	58000	5	55392	82100	5	33428	49000	5	46485	54700	5	49092	60300	5	40318	43200	5	53287	72100	5	39805	63200	5	43787
O76094	Signal recognition particle subunit SRP72 OS=Homo sapiens OX=9606 GN=SRP72 PE=1 SV=3	sp|O76094|SRP72_HUMAN	1	17247	17200	1	16480	16500	1	29119	29100	1	19315	19300	1	8736	#N/A	1	29363	#N/A	1	20942	20900	1	21933	21900	1	16845	16800	1	22946	#N/A	1	22168	22200	1	22355	#N/A	1	24532	24500	1	16694	16700	1	18304	18300	1	23759
O94760	N(G),N(G)-dimethylarginine dimethylaminohydrolase 1 OS=Homo sapiens OX=9606 GN=DDAH1 PE=1 SV=3	sp|O94760|DDAH1_HUMAN	2	26945	26900	2	15531	15500	2	9210	9210	2	13708	13700	2	8024	3520	2	9542	7270	2	6195	6200	2	11426	11400	2	4078	4080	2	10159	10200	2	8574	8570	2	13600	13600	2	5949	5150	2	4328	4330	2	2925	947	2	18966
O94776	Metastasis-associated protein MTA2 OS=Homo sapiens OX=9606 GN=MTA2 PE=1 SV=1	sp|O94776|MTA2_HUMAN	2	43429	43400	2	32116	32100	2	61233	61200	2	32894	32900	2	22052	22100	2	43925	22600	2	15470	15500	2	35072	35100	2	27376	27400	2	36091	36100	2	34835	34800	2	38747	38700	2	28919	28900	2	20695	20700	2	35716	35700	2	46277
O94804	Serine/threonine-protein kinase 10 OS=Homo sapiens OX=9606 GN=STK10 PE=1 SV=1	sp|O94804|STK10_HUMAN	8	177764	244000	8	73808	85900	8	141803	193000	8	78471	98900	8	60413	73300	8	96762	117000	8	73710	84200	8	119474	139000	8	110775	139000	8	98926	139000	8	94927	124000	8	87754	100000	8	73805	87500	8	100712	131000	8	113379	167000	8	146781
O94808	Glutamine--fructose-6-phosphate aminotransferase [isomerizing] 2 OS=Homo sapiens OX=9606 GN=GFPT2 PE=1 SV=3	sp|O94808|GFPT2_HUMAN	7	59139	57200	7	58763	12200	7	71908	71900	7	56286	56300	7	147589	135000	7	54588	27000	7	50536	47000	7	53091	39400	7	45305	35100	7	83038	74800	7	61581	61600	7	44468	40100	7	73102	73100	7	49260	49300	7	57249	55700	7	52099
O94826	Mitochondrial import receptor subunit TOM70 OS=Homo sapiens OX=9606 GN=TOMM70 PE=1 SV=1	sp|O94826|TOM70_HUMAN	10	140056	152000	10	99775	115000	10	162992	195000	10	132952	151000	10	77821	87200	10	102847	116000	10	122646	135000	10	116137	133000	10	78943	90800	10	119065	134000	10	143364	164000	10	134305	140000	10	142849	165000	10	97417	121000	10	92467	96400	10	133774
O94829	Importin-13 OS=Homo sapiens OX=9606 GN=IPO13 PE=1 SV=3	sp|O94829|IPO13_HUMAN	3	130116	130000	3	71275	57100	3	178236	178000	3	35859	2350	3	9395	9400	3	115261	16400	3	11713	11700	3	15508	15500	3	22999	23000	3	20538	13500	3	156620	138000	3	73000	10600	3	34112	16500	3	56220	56200	3	30509	9950	3	20958
O94832	Unconventional myosin-Id OS=Homo sapiens OX=9606 GN=MYO1D PE=1 SV=2	sp|O94832|MYO1D_HUMAN	21	230827	186000	21	141879	140000	21	266824	248000	21	215655	205000	21	216686	174000	21	270729	249000	21	202562	183000	21	288725	286000	21	172483	146000	21	333724	266000	21	254883	249000	21	261075	258000	21	326156	320000	21	293797	273000	21	274386	270000	21	330210
O94868	F-BAR and double SH3 domains protein 2 OS=Homo sapiens OX=9606 GN=FCHSD2 PE=1 SV=3	sp|O94868|FCSD2_HUMAN	1	3792	3790	1	964	964	1	2877	2880	1	1741	1740	1	920	920	1	6520	6520	1	1024	1020	1	1458	1460	1	1572	1570	1	857	857	1	2948	2950	1	5771	5770	1	2924	2920	1	2628	2630	1	3988	3990	1	4597
O94885	SAM and SH3 domain-containing protein 1 OS=Homo sapiens OX=9606 GN=SASH1 PE=1 SV=3	sp|O94885|SASH1_HUMAN	5	54116	54100	5	23111	23100	5	69109	69100	5	37714	37700	5	43228	42600	5	57625	57600	5	20686	19800	5	57676	33300	5	22106	14600	5	39863	39900	5	42714	26800	5	39989	34900	5	31331	20100	5	32307	19200	5	44139	25300	5	33384
O94886	CSC1-like protein 1 OS=Homo sapiens OX=9606 GN=TMEM63A PE=1 SV=3	sp|O94886|CSCL1_HUMAN	2	12700	12700	2	12182	12200	2	32753	32800	2	19089	19100	2	5114	1090	2	36307	36300	2	8876	8880	2	72990	73000	2	9196	9200	2	10490	10500	2	13267	13300	2	31086	31100	2	16759	3870	2	11109	11100	2	10045	10000	2	7171
O94888	UBX domain-containing protein 7 OS=Homo sapiens OX=9606 GN=UBXN7 PE=1 SV=2	sp|O94888|UBXN7_HUMAN	3	37253	37300	3	71564	71600	3	33922	19300	3	20289	20300	3	38321	38300	3	111817	112000	3	34968	35000	3	51850	51900	3	16881	4790	3	39712	39700	3	89160	89200	3	57011	42000	3	25929	17400	3	19952	9890	3	33237	33200	3	40027
O94903	Pyridoxal phosphate homeostasis protein OS=Homo sapiens OX=9606 GN=PLPBP PE=1 SV=1	sp|O94903|PLPHP_HUMAN	4	184578	160000	4	53049	43700	4	82085	64400	4	40452	34900	4	24522	23800	4	46396	40100	4	35952	36000	4	57935	42700	4	98187	95000	4	42012	42000	4	53960	54000	4	29574	29600	4	68663	49800	4	171989	167000	4	46278	35600	4	57084
O94905	Erlin-2 OS=Homo sapiens OX=9606 GN=ERLIN2 PE=1 SV=1	sp|O94905|ERLN2_HUMAN	4	72289	72300	4	41364	41400	4	91737	85700	4	65770	65800	4	35957	36000	4	63421	63400	4	47724	47700	4	68407	66200	4	59203	59200	4	80740	77400	4	63637	63600	4	69857	69900	4	54758	54800	4	73884	73900	4	53608	53600	4	52857
O94915	Protein furry homolog-like OS=Homo sapiens OX=9606 GN=FRYL PE=1 SV=2	sp|O94915|FRYL_HUMAN	1	6441	6440	1	7373	7370	1	10801	10800	1	8257	8260	1	6455	6460	1	8525	8520	1	11752	11800	1	6351	#N/A	1	3654	#N/A	1	6366	#N/A	1	7272	7270	1	7757	7760	1	5951	#N/A	1	3609	3610	1	7292	7290	1	9623
O94919	Endonuclease domain-containing 1 protein OS=Homo sapiens OX=9606 GN=ENDOD1 PE=1 SV=2	sp|O94919|ENDD1_HUMAN	6	173599	174000	6	84168	34100	6	202829	60400	6	58829	58800	6	38582	38600	6	76142	76100	6	81433	81400	6	75131	75100	6	51588	51600	6	49493	48100	6	125983	37000	6	78787	78800	6	101824	34800	6	136844	39100	6	130734	26300	6	128521
O94925	Glutaminase kidney isoform, mitochondrial OS=Homo sapiens OX=9606 GN=GLS PE=1 SV=1	sp|O94925|GLSK_HUMAN	3	8180	9340	3	1921	2340	3	8867	8420	3	11686	16200	3	3283	2120	3	31094	28600	3	7613	8350	3	5172	6630	3	8122	11800	3	12145	15000	3	5452	5880	3	7180	5200	3	8390	11600	3	23965	26600	3	5430	7470	3	7742
O94925-3	Isoform 3 of Glutaminase kidney isoform, mitochondrial OS=Homo sapiens OX=9606 GN=GLS	sp|O94925-3|GLSK_HUMAN	4	85511	117000	4	50617	101000	4	182913	366000	4	60956	122000	4	53196	106000	4	86615	173000	4	92045	184000	4	77338	155000	4	92434	185000	4	97020	194000	4	81885	164000	4	76588	153000	4	113420	227000	4	96860	194000	4	80255	161000	4	131515
O94955	Rho-related BTB domain-containing protein 3 OS=Homo sapiens OX=9606 GN=RHOBTB3 PE=1 SV=2	sp|O94955|RHBT3_HUMAN	1	7544	7540	1	7688	7690	1	1803	1800	1	1283	1280	1	1219	1220	1	1408	1410	1	2099	#N/A	1	1755	1750	1	1606	1610	1	2224	#N/A	1	2791	2790	1	1469	1470	1	2519	2520	1	2616	2620	1	4499	4500	1	4994
O94979-7	Isoform 7 of Protein transport protein Sec31A OS=Homo sapiens OX=9606 GN=SEC31A	sp|O94979-7|SC31A_HUMAN	1	4920	4920	1	4026	4030	1	12990	#N/A	1	3721	#N/A	1	1458	1460	1	2931	2930	1	4313	4310	1	7135	7130	1	6802	6800	1	5287	5290	1	3020	#N/A	1	6753	6750	1	3666	3670	1	1126	1130	1	2688	#N/A	1	7307
O94992	Protein HEXIM1 OS=Homo sapiens OX=9606 GN=HEXIM1 PE=1 SV=1	sp|O94992|HEXI1_HUMAN	2	21187	21200	2	9877	9880	2	37313	37300	2	15860	15900	2	16886	16900	2	11976	12000	2	6804	6800	2	27547	27500	2	20225	20200	2	32204	32200	2	24542	24500	2	33284	33300	2	19306	19300	2	30600	30600	2	2390	2390	2	32130
O95070	Protein YIF1A OS=Homo sapiens OX=9606 GN=YIF1A PE=1 SV=2	sp|O95070|YIF1A_HUMAN	1	3658	3660	1	3029	3030	1	6095	#N/A	1	2095	#N/A	1	5644	#N/A	1	11829	11800	1	2749	2750	1	8457	8460	1	8168	8170	1	8193	#N/A	1	3150	3150	1	10600	#N/A	1	6186	6190	1	3577	#N/A	1	2937	2940	1	8976
O95081	Arf-GAP domain and FG repeat-containing protein 2 OS=Homo sapiens OX=9606 GN=AGFG2 PE=1 SV=2	sp|O95081|AGFG2_HUMAN	1	1589	1590	1	1953	1950	1	1289	#N/A	1	835	835	1	776	776	1	5951	5950	1	1819	1820	1	1246	1250	1	1869	1870	1	5036	5040	1	499	#N/A	1	2084	2080	1	992	992	1	1108	1110	1	4332	4330	1	1339
O95140	Mitofusin-2 OS=Homo sapiens OX=9606 GN=MFN2 PE=1 SV=3	sp|O95140|MFN2_HUMAN	2	14427	9110	2	141245	141000	2	19357	19400	2	12709	10900	2	42988	43000	2	155793	156000	2	34525	34500	2	24557	22200	2	28114	28100	2	36477	36500	2	103399	103000	2	104832	105000	2	19056	8420	2	111280	111000	2	14601	14600	2	83195
O95159	Zinc finger protein-like 1 OS=Homo sapiens OX=9606 GN=ZFPL1 PE=1 SV=2	sp|O95159|ZFPL1_HUMAN	3	31768	25700	3	55256	54500	3	94571	88900	3	26460	26500	3	44875	42900	3	74644	74600	3	67626	67600	3	33877	26700	3	57724	57000	3	57223	57200	3	73594	67200	3	32989	33000	3	68252	61700	3	84567	81700	3	69924	69900	3	69970
O95163	Elongator complex protein 1 OS=Homo sapiens OX=9606 GN=ELP1 PE=1 SV=3	sp|O95163|ELP1_HUMAN	12	97909	106000	12	86290	94700	12	148630	153000	12	109920	101000	12	74605	66200	12	138638	132000	12	111976	118000	12	127878	114000	12	111372	112000	12	130679	118000	12	149895	137000	12	154099	142000	12	117657	122000	12	143788	138000	12	103359	94600	12	178024
O95164	Ubiquitin-like protein 3 OS=Homo sapiens OX=9606 GN=UBL3 PE=1 SV=1	sp|O95164|UBL3_HUMAN	1	934	934	1	332	332	1	747	747	1	775	775	1	443	443	1	419	#N/A	1	162	162	1	494	494	1	217	217	1	226	226	1	273	273	1	332	#N/A	1	332	332	1	562	562	1	286	286	1	656
O95167	NADH dehydrogenase [ubiquinone] 1 alpha subcomplex subunit 3 OS=Homo sapiens OX=9606 GN=NDUFA3 PE=1 SV=1	sp|O95167|NDUA3_HUMAN	1	5320	#N/A	1	10260	10300	1	1962	#N/A	1	14228	14200	1	7122	#N/A	1	3228	3230	1	1979	1980	1	3007	#N/A	1	4438	4440	1	2726	2730	1	15887	15900	1	2919	2920	1	3033	#N/A	1	1255	#N/A	1	11953	12000	1	15621
O95182	NADH dehydrogenase [ubiquinone] 1 alpha subcomplex subunit 7 OS=Homo sapiens OX=9606 GN=NDUFA7 PE=1 SV=3	sp|O95182|NDUA7_HUMAN	2	61054	61100	2	47158	47200	2	8318	8320	2	5143	5140	2	34313	34300	2	65599	65600	2	7181	7180	2	60736	60700	2	49280	49300	2	47133	47100	2	46792	46800	2	57192	57200	2	41571	41600	2	9355	9350	2	62000	62000	2	46955
O95183	Vesicle-associated membrane protein 5 OS=Homo sapiens OX=9606 GN=VAMP5 PE=1 SV=1	sp|O95183|VAMP5_HUMAN	2	52255	52300	2	28028	28000	2	44695	44700	2	32288	32300	2	28595	7320	2	71228	29000	2	50258	50300	2	66732	66700	2	42888	13100	2	45704	16300	2	53241	53200	2	34637	15000	2	39651	39700	2	44847	44800	2	53383	53400	2	43072
O95202	Mitochondrial proton/calcium exchanger protein OS=Homo sapiens OX=9606 GN=LETM1 PE=1 SV=1	sp|O95202|LETM1_HUMAN	5	305978	306000	5	557949	558000	5	258674	259000	5	217138	50600	5	148676	28700	5	394633	395000	5	184045	29100	5	263179	263000	5	270494	68000	5	279298	67500	5	280615	281000	5	214691	215000	5	302142	292000	5	203326	27600	5	328682	329000	5	115196
O95210	Starch-binding domain-containing protein 1 OS=Homo sapiens OX=9606 GN=STBD1 PE=1 SV=1	sp|O95210|STBD1_HUMAN	4	64475	15800	4	8113	8110	4	96622	12900	4	17079	11200	4	15270	14700	4	20545	20500	4	13239	13200	4	72919	9030	4	12419	12400	4	20644	20600	4	26945	26900	4	21369	20100	4	53773	6780	4	13247	13200	4	28601	12000	4	17161
O95219	Sorting nexin-4 OS=Homo sapiens OX=9606 GN=SNX4 PE=1 SV=1	sp|O95219|SNX4_HUMAN	2	25571	25600	2	18369	18400	2	45566	45600	2	14745	14700	2	20347	9790	2	24392	7350	2	22248	22200	2	33568	33600	2	20963	11500	2	31953	11500	2	32596	11500	2	22396	10800	2	29739	29700	2	36749	36700	2	31285	31300	2	32193
O95232	Luc7-like protein 3 OS=Homo sapiens OX=9606 GN=LUC7L3 PE=1 SV=2	sp|O95232|LC7L3_HUMAN	1	2260	2260	1	2467	2470	1	15512	15500	1	4690	4690	1	3805	3800	1	7783	7780	1	9084	9080	1	2031	2030	1	7165	7170	1	4616	4620	1	6508	6510	1	4713	#N/A	1	7421	7420	1	9845	9840	1	4837	4840	1	3680
O95249	Golgi SNAP receptor complex member 1 OS=Homo sapiens OX=9606 GN=GOSR1 PE=1 SV=1	sp|O95249|GOSR1_HUMAN	1	55361	55400	1	6210	6210	1	47158	47200	1	31734	31700	1	21845	21800	1	52278	52300	1	21689	21700	1	39446	39400	1	34048	34000	1	35318	35300	1	35628	35600	1	50453	50500	1	35328	35300	1	31073	31100	1	40562	40600	1	46723
O95292	Vesicle-associated membrane protein-associated protein B/C OS=Homo sapiens OX=9606 GN=VAPB PE=1 SV=3	sp|O95292|VAPB_HUMAN	4	28806	30900	4	19809	21000	4	20796	22600	4	14323	16400	4	20755	8070	4	25910	31500	4	18308	22000	4	22368	24600	4	14667	17400	4	26617	34600	4	17973	18500	4	27523	29600	4	24238	30400	4	24737	31900	4	15608	18600	4	26950
O95295	SNARE-associated protein Snapin OS=Homo sapiens OX=9606 GN=SNAPIN PE=1 SV=1	sp|O95295|SNAPN_HUMAN	3	52731	52700	3	27323	27300	3	53118	53100	3	27826	27800	3	15820	15800	3	32047	32000	3	22344	22300	3	56336	56300	3	21536	21500	3	32255	32300	3	14122	14100	3	37337	37300	3	29880	29900	3	23037	23000	3	14226	11400	3	50264
O95336	6-phosphogluconolactonase OS=Homo sapiens OX=9606 GN=PGLS PE=1 SV=2	sp|O95336|6PGL_HUMAN	15	1456994	1900000	15	772093	977000	15	1614777	2060000	15	1139635	1550000	15	830909	861000	15	1375605	1380000	15	978945	979000	15	1344433	1740000	15	1057731	1030000	15	1295761	1240000	15	1322925	1290000	15	1248932	1250000	15	1227969	1150000	15	1312002	1730000	15	1170559	1510000	15	1256482
O95347	Structural maintenance of chromosomes protein 2 OS=Homo sapiens OX=9606 GN=SMC2 PE=1 SV=2	sp|O95347|SMC2_HUMAN	1	10924	10900	1	5206	5210	1	54896	54900	1	3196	3200	1	3916	3920	1	4242	#N/A	1	4971	4970	1	4606	4610	1	2320	2320	1	4526	#N/A	1	1696	1700	1	2084	#N/A	1	2482	2480	1	1570	1570	1	5462	#N/A	1	2755
O95363	Phenylalanine--tRNA ligase, mitochondrial OS=Homo sapiens OX=9606 GN=FARS2 PE=1 SV=1	sp|O95363|SYFM_HUMAN	1	9038	9040	1	4400	4400	1	14117	14100	1	4336	4340	1	13855	13900	1	5733	5730	1	3392	3390	1	5046	5050	1	5692	5690	1	3672	#N/A	1	6959	#N/A	1	5674	5670	1	3121	3120	1	5032	5030	1	8136	8140	1	7638
O95372	Acyl-protein thioesterase 2 OS=Homo sapiens OX=9606 GN=LYPLA2 PE=1 SV=1	sp|O95372|LYPA2_HUMAN	3	42884	81300	3	32266	63100	3	60560	113000	3	41813	74800	3	29992	56300	3	70512	116000	3	38909	77000	3	60218	113000	3	43354	82400	3	49930	89700	3	63299	115000	3	49902	91800	3	55880	104000	3	51499	93100	3	44359	79500	3	46551
O95373	Importin-7 OS=Homo sapiens OX=9606 GN=IPO7 PE=1 SV=1	sp|O95373|IPO7_HUMAN	17	222281	359000	17	157942	218000	17	347214	493000	17	266084	418000	17	176541	277000	17	237964	321000	17	223793	327000	17	258833	373000	17	186658	275000	17	256220	384000	17	278445	402000	17	230550	329000	17	232330	346000	17	189047	283000	17	198225	267000	17	278831
O95376	E3 ubiquitin-protein ligase ARIH2 OS=Homo sapiens OX=9606 GN=ARIH2 PE=1 SV=1	sp|O95376|ARI2_HUMAN	2	6313	6310	2	7267	3350	2	27070	27100	2	10501	1740	2	3367	3370	2	11950	6430	2	4430	4430	2	15760	15800	2	3801	1740	2	6145	4680	2	13285	13300	2	6786	2110	2	9519	814	2	5485	1440	2	7520	1650	2	11898
O95391	Pre-mRNA-splicing factor SLU7 OS=Homo sapiens OX=9606 GN=SLU7 PE=1 SV=2	sp|O95391|SLU7_HUMAN	1	17944	17900	1	10885	10900	1	53742	53700	1	15518	15500	1	18152	18200	1	15517	15500	1	21160	21200	1	11877	11900	1	13887	13900	1	51496	51500	1	12711	12700	1	13421	13400	1	14033	14000	1	14414	14400	1	7133	7130	1	21072
O95396	Adenylyltransferase and sulfurtransferase MOCS3 OS=Homo sapiens OX=9606 GN=MOCS3 PE=1 SV=1	sp|O95396|MOCS3_HUMAN	2	21410	14800	2	10860	1680	2	13989	14000	2	10333	1350	2	6160	6160	2	13412	13400	2	9287	4660	2	8680	8680	2	13954	1670	2	16822	5120	2	37598	37600	2	7813	3510	2	4014	#N/A	2	8835	5880	2	8323	8320	2	13296
O95400	CD2 antigen cytoplasmic tail-binding protein 2 OS=Homo sapiens OX=9606 GN=CD2BP2 PE=1 SV=1	sp|O95400|CD2B2_HUMAN	5	57328	41900	5	25659	25700	5	63355	63400	5	76596	76600	5	35011	22400	5	46775	46800	5	102335	98600	5	46258	46300	5	44925	44900	5	52056	52100	5	31150	25300	5	58523	34300	5	39322	39300	5	78111	73600	5	57631	57600	5	70948
O95433	Activator of 90 kDa heat shock protein ATPase homolog 1 OS=Homo sapiens OX=9606 GN=AHSA1 PE=1 SV=1	sp|O95433|AHSA1_HUMAN	1	4329	4330	1	1007	#N/A	1	4558	4560	1	3761	3760	1	1673	1670	1	3496	3500	1	3414	3410	1	1605	#N/A	1	1896	1900	1	3728	3730	1	3917	3920	1	4110	4110	1	3007	3010	1	1320	1320	1	1183	1180	1	4514
O95470	Sphingosine-1-phosphate lyase 1 OS=Homo sapiens OX=9606 GN=SGPL1 PE=1 SV=3	sp|O95470|SGPL1_HUMAN	6	24971	22400	6	18176	7640	6	28040	19100	6	31757	27500	6	16225	16200	6	24301	18300	6	18120	13500	6	20126	10200	6	21349	11800	6	19957	6080	6	34025	31300	6	16954	15100	6	18024	18000	6	23828	23800	6	15240	13200	6	25606
O95478	Ribosome biogenesis protein NSA2 homolog OS=Homo sapiens OX=9606 GN=NSA2 PE=1 SV=1	sp|O95478|NSA2_HUMAN	1	22756	22800	1	4419	#N/A	1	5994	#N/A	1	33700	33700	1	1821	#N/A	1	38199	38200	1	28281	28300	1	41581	41600	1	4834	4830	1	6868	6870	1	3086	#N/A	1	10549	10500	1	7040	7040	1	31841	31800	1	6384	6380	1	33736
O95479	GDH/6PGL endoplasmic bifunctional protein OS=Homo sapiens OX=9606 GN=H6PD PE=1 SV=2	sp|O95479|G6PE_HUMAN	10	119667	91400	10	46701	24300	10	198935	218000	10	86969	90900	10	78024	40800	10	99899	95000	10	103261	76000	10	91959	91900	10	61507	61600	10	75854	73600	10	72200	65000	10	152415	96600	10	81738	78700	10	82823	76700	10	74481	76200	10	74286
O95486	Protein transport protein Sec24A OS=Homo sapiens OX=9606 GN=SEC24A PE=1 SV=2	sp|O95486|SC24A_HUMAN	8	54719	47900	8	108456	108000	8	69244	67100	8	239524	231000	8	26075	26100	8	338777	339000	8	52268	44900	8	36016	34600	8	171374	168000	8	170742	171000	8	196745	187000	8	50050	44400	8	62837	62800	8	130334	124000	8	85173	85200	8	278267
O95563	Mitochondrial pyruvate carrier 2 OS=Homo sapiens OX=9606 GN=MPC2 PE=1 SV=1	sp|O95563|MPC2_HUMAN	3	34916	34900	3	21533	21500	3	39141	39100	3	15250	15300	3	6393	6390	3	30127	30100	3	9522	9520	3	27534	27500	3	18257	4920	3	21262	3840	3	29090	27500	3	19880	19900	3	15576	15600	3	13492	7980	3	17921	17900	3	23528
O95571	Persulfide dioxygenase ETHE1, mitochondrial OS=Homo sapiens OX=9606 GN=ETHE1 PE=1 SV=2	sp|O95571|ETHE1_HUMAN	10	247996	331000	10	1934305	5260000	10	284569	386000	10	1245942	3530000	10	543798	1400000	10	2110327	6020000	10	681243	1830000	10	1298713	3540000	10	1103991	3010000	10	1091367	2910000	10	1037162	2790000	10	1043784	2840000	10	135366	155000	10	220159	281000	10	1178355	3250000	10	171984
O95573	Long-chain-fatty-acid--CoA ligase 3 OS=Homo sapiens OX=9606 GN=ACSL3 PE=1 SV=3	sp|O95573|ACSL3_HUMAN	12	277313	385000	12	199023	271000	12	380269	493000	12	192518	169000	12	106979	88800	12	369080	420000	12	192987	171000	12	292032	393000	12	352794	371000	12	503397	527000	12	414674	509000	12	229154	232000	12	188543	274000	12	244225	214000	12	345143	345000	12	329671
O95602	DNA-directed RNA polymerase I subunit RPA1 OS=Homo sapiens OX=9606 GN=POLR1A PE=1 SV=2	sp|O95602|RPA1_HUMAN	4	133954	134000	4	60071	60100	4	160026	160000	4	105188	103000	4	15675	13900	4	104799	86900	4	97234	97200	4	37682	37700	4	112916	113000	4	123843	110000	4	119596	120000	4	124766	122000	4	83679	78800	4	112895	113000	4	78036	78000	4	123072
O95674	Phosphatidate cytidylyltransferase 2 OS=Homo sapiens OX=9606 GN=CDS2 PE=1 SV=1	sp|O95674|CDS2_HUMAN	2	17700	17700	2	7585	7580	2	21740	21700	2	13724	13700	2	9978	9980	2	18224	18200	2	7846	7850	2	15340	15300	2	8010	8010	2	15653	15700	2	17217	17200	2	8980	8980	2	12513	12500	2	6101	6100	2	14843	14800	2	15119
O95685	Protein phosphatase 1 regulatory subunit 3D OS=Homo sapiens OX=9606 GN=PPP1R3D PE=1 SV=1	sp|O95685|PPR3D_HUMAN	1	9177	9180	1	12588	12600	1	12623	12600	1	8944	8940	1	4520	4520	1	15720	15700	1	9917	9920	1	15153	15200	1	3427	3430	1	9352	9350	1	17533	17500	1	10245	10200	1	3866	3870	1	11327	11300	1	7298	7300	1	7803
O95714	E3 ubiquitin-protein ligase HERC2 OS=Homo sapiens OX=9606 GN=HERC2 PE=1 SV=2	sp|O95714|HERC2_HUMAN	2	21159	42300	2	13472	26900	2	30265	60500	2	31100	62200	2	19205	38400	2	21383	42800	2	10227	20500	2	17957	35900	2	24216	48400	2	27960	55900	2	24355	48700	2	9237	18500	2	10238	20500	2	13775	27500	2	15492	31000	2	21410
O95716	Ras-related protein Rab-3D OS=Homo sapiens OX=9606 GN=RAB3D PE=1 SV=1	sp|O95716|RAB3D_HUMAN	1	117876	118000	1	69046	69000	1	177127	177000	1	98615	98600	1	59444	59400	1	80898	80900	1	74877	74900	1	117006	117000	1	97235	97200	1	89019	89000	1	76993	77000	1	50970	51000	1	65326	65300	1	73091	73100	1	62556	62600	1	90345
O95721	Synaptosomal-associated protein 29 OS=Homo sapiens OX=9606 GN=SNAP29 PE=1 SV=1	sp|O95721|SNP29_HUMAN	5	56508	56500	5	43903	43900	5	61765	57800	5	46453	46500	5	21462	14200	5	50747	50700	5	34991	35000	5	48032	48000	5	44581	44600	5	59532	59500	5	56275	56300	5	48821	48800	5	43473	43500	5	39736	39700	5	38873	38900	5	56325
O95747	Serine/threonine-protein kinase OSR1 OS=Homo sapiens OX=9606 GN=OXSR1 PE=1 SV=1	sp|O95747|OXSR1_HUMAN	1	19635	19600	1	13209	13200	1	25221	#N/A	1	3947	3950	1	15026	15000	1	40514	40500	1	16205	16200	1	23145	#N/A	1	5180	5180	1	26370	26400	1	12505	#N/A	1	21892	21900	1	19992	#N/A	1	19608	19600	1	15219	#N/A	1	15430
O95777	U6 snRNA-associated Sm-like protein LSm8 OS=Homo sapiens OX=9606 GN=LSM8 PE=1 SV=3	sp|O95777|LSM8_HUMAN	3	60607	60600	3	41115	41100	3	85905	85900	3	55581	55600	3	34212	34200	3	107746	108000	3	57547	53300	3	55746	55700	3	60268	56600	3	66678	66700	3	106755	107000	3	78845	78800	3	100904	101000	3	71637	71600	3	52106	52100	3	83252
O95801	Tetratricopeptide repeat protein 4 OS=Homo sapiens OX=9606 GN=TTC4 PE=1 SV=3	sp|O95801|TTC4_HUMAN	5	43739	33900	5	43492	48500	5	39179	#N/A	5	39675	35600	5	17849	16600	5	39769	32900	5	25730	31300	5	49177	37900	5	39726	30900	5	39091	32100	5	43823	54900	5	41791	44700	5	52677	43000	5	37658	41800	5	21318	16100	5	45657
O95810	Caveolae-associated protein 2 OS=Homo sapiens OX=9606 GN=CAVIN2 PE=1 SV=3	sp|O95810|CAVN2_HUMAN	3	27397	27400	3	30392	30400	3	40299	40300	3	14445	14400	3	16205	16200	3	43116	43100	3	14647	14600	3	24067	20200	3	23465	23500	3	31798	31800	3	17925	17900	3	23176	23200	3	36631	28900	3	13240	13200	3	27452	17700	3	17305
O95816	BAG family molecular chaperone regulator 2 OS=Homo sapiens OX=9606 GN=BAG2 PE=1 SV=1	sp|O95816|BAG2_HUMAN	1	53325	53300	1	45250	45300	1	72509	72500	1	50941	50900	1	44741	44700	1	47162	47200	1	49452	49500	1	47896	47900	1	56077	56100	1	10660	10700	1	56171	56200	1	60458	60500	1	52838	52800	1	70889	70900	1	54815	54800	1	74913
O95817	BAG family molecular chaperone regulator 3 OS=Homo sapiens OX=9606 GN=BAG3 PE=1 SV=3	sp|O95817|BAG3_HUMAN	9	89045	94600	9	51462	53300	9	135638	134000	9	87828	84900	9	40858	40200	9	72088	71700	9	75804	77300	9	81432	79300	9	95092	99400	9	106819	106000	9	78912	76000	9	100818	106000	9	80638	86400	9	70910	69700	9	71610	74700	9	106347
O95833	Chloride intracellular channel protein 3 OS=Homo sapiens OX=9606 GN=CLIC3 PE=1 SV=2	sp|O95833|CLIC3_HUMAN	3	24777	28800	3	126562	133000	3	36041	37600	3	104567	113000	3	60045	69800	3	8551	10100	3	28893	46900	3	103233	112000	3	92831	104000	3	8478	10100	3	16812	29200	3	95668	106000	3	14927	22300	3	104639	113000	3	15356	18600	3	115958
O95865	N(G),N(G)-dimethylarginine dimethylaminohydrolase 2 OS=Homo sapiens OX=9606 GN=DDAH2 PE=1 SV=1	sp|O95865|DDAH2_HUMAN	7	169371	169000	7	105903	88800	7	184419	179000	7	118253	97000	7	73943	73900	7	217189	189000	7	110275	102000	7	134792	135000	7	111030	82400	7	147512	133000	7	115756	109000	7	170448	152000	7	192584	193000	7	99997	100000	7	138415	110000	7	165743
O95870	Protein ABHD16A OS=Homo sapiens OX=9606 GN=ABHD16A PE=1 SV=3	sp|O95870|ABHGA_HUMAN	1	34535	34500	1	5988	5990	1	15896	#N/A	1	7158	7160	1	11520	11500	1	12127	12100	1	16977	17000	1	13493	13500	1	9904	9900	1	31473	31500	1	16180	16200	1	6029	6030	1	16133	#N/A	1	16583	16600	1	5996	6000	1	11509
O95881	Thioredoxin domain-containing protein 12 OS=Homo sapiens OX=9606 GN=TXNDC12 PE=1 SV=1	sp|O95881|TXD12_HUMAN	5	60463	64800	5	55738	56800	5	88876	57300	5	105409	107000	5	54116	54500	5	70256	63900	5	79312	80600	5	132983	128000	5	99822	101000	5	101339	98600	5	83084	84200	5	91309	93700	5	93094	94500	5	91488	92600	5	83706	82300	5	134391
O95980	Reversion-inducing cysteine-rich protein with Kazal motifs OS=Homo sapiens OX=9606 GN=RECK PE=1 SV=1	sp|O95980|RECK_HUMAN	3	13281	13300	3	6680	6680	3	19118	19100	3	3117	3120	3	9298	6930	3	12741	12700	3	12022	12000	3	19315	19300	3	7790	7790	3	16395	15600	3	15265	15300	3	14235	10400	3	12421	12400	3	10495	10500	3	19762	19800	3	12545
O95989	Diphosphoinositol polyphosphate phosphohydrolase 1 OS=Homo sapiens OX=9606 GN=NUDT3 PE=1 SV=1	sp|O95989|NUDT3_HUMAN	5	46005	76400	5	20468	39800	5	51164	92600	5	28185	46200	5	18772	33800	5	62006	86600	5	32521	43900	5	54370	104000	5	42592	80900	5	43596	63700	5	39767	71000	5	25680	32000	5	33535	53500	5	34396	42200	5	44433	73800	5	41029
O95999	B-cell lymphoma/leukemia 10 OS=Homo sapiens OX=9606 GN=BCL10 PE=1 SV=1	sp|O95999|BCL10_HUMAN	1	18919	18900	1	7619	#N/A	1	10692	10700	1	11932	11900	1	3004	3000	1	7393	7390	1	7358	7360	1	8265	8270	1	11433	11400	1	8668	8670	1	18838	18800	1	10740	10700	1	4032	4030	1	7745	7750	1	11711	11700	1	17280
O96000	NADH dehydrogenase [ubiquinone] 1 beta subcomplex subunit 10 OS=Homo sapiens OX=9606 GN=NDUFB10 PE=1 SV=3	sp|O96000|NDUBA_HUMAN	1	4924	#N/A	1	3937	#N/A	1	2025	2030	1	1569	#N/A	1	3174	3170	1	4582	#N/A	1	2841	2840	1	3925	3920	1	1439	#N/A	1	2561	#N/A	1	2030	2030	1	6932	6930	1	2986	#N/A	1	2833	2830	1	2803	#N/A	1	8425
O96008	Mitochondrial import receptor subunit TOM40 homolog OS=Homo sapiens OX=9606 GN=TOMM40 PE=1 SV=1	sp|O96008|TOM40_HUMAN	1	48046	48000	1	30473	30500	1	48048	48000	1	37645	37600	1	23235	23200	1	56370	56400	1	34049	34000	1	45784	45800	1	50414	50400	1	30183	30200	1	35962	36000	1	41401	41400	1	42615	42600	1	37382	37400	1	37419	37400	1	50101
O96013	Serine/threonine-protein kinase PAK 4 OS=Homo sapiens OX=9606 GN=PAK4 PE=1 SV=1	sp|O96013|PAK4_HUMAN	1	765	#N/A	1	1120	1120	1	2060	2060	1	2546	2550	1	630	#N/A	1	1179	1180	1	1804	1800	1	2441	2440	1	735	#N/A	1	825	825	1	5160	5160	1	2255	2260	1	1548	1550	1	433	433	1	2117	2120	1	1325
P00352	Retinal dehydrogenase 1 OS=Homo sapiens OX=9606 GN=ALDH1A1 PE=1 SV=2	sp|P00352|AL1A1_HUMAN	2	19439	19400	2	15939	15900	2	25236	25200	2	10653	10700	2	5402	5400	2	12457	12500	2	12515	12500	2	24403	24400	2	13180	13200	2	15938	15900	2	11171	11200	2	15331	10300	2	10453	8040	2	12690	12700	2	9325	2620	2	13993
P00374	Dihydrofolate reductase OS=Homo sapiens OX=9606 GN=DHFR PE=1 SV=2	sp|P00374|DYR_HUMAN	2	83594	167000	2	94828	190000	2	84862	170000	2	42365	84700	2	9011	18000	2	78272	#N/A	2	25422	#N/A	2	78734	157000	2	59815	#N/A	2	53275	#N/A	2	80464	161000	2	57292	#N/A	2	53020	106000	2	30190	60400	2	67461	135000	2	93330
P00403	Cytochrome c oxidase subunit 2 OS=Homo sapiens OX=9606 GN=MT-CO2 PE=1 SV=1	sp|P00403|COX2_HUMAN	6	316204	316000	6	216174	216000	6	577097	577000	6	418822	419000	6	246368	220000	6	474887	475000	6	293782	294000	6	425178	425000	6	303967	304000	6	302126	302000	6	495853	496000	6	514298	514000	6	521305	521000	6	334246	334000	6	339734	284000	6	384032
P00441	Superoxide dismutase [Cu-Zn] OS=Homo sapiens OX=9606 GN=SOD1 PE=1 SV=2	sp|P00441|SODC_HUMAN	1	11329	11300	1	7588	7590	1	46135	46100	1	13549	13500	1	16126	16100	1	19111	19100	1	27118	27100	1	29147	29100	1	23619	23600	1	41563	41600	1	23358	23400	1	24819	24800	1	37578	37600	1	34435	34400	1	15697	15700	1	29399
P00491	Purine nucleoside phosphorylase OS=Homo sapiens OX=9606 GN=PNP PE=1 SV=2	sp|P00491|PNPH_HUMAN	11	273771	313000	11	244587	257000	11	616977	690000	11	328673	370000	11	217451	196000	11	347657	364000	11	218453	220000	11	376024	431000	11	237247	261000	11	436948	462000	11	242314	288000	11	345288	390000	11	220540	248000	11	215446	211000	11	242344	281000	11	453711
P00492	Hypoxanthine-guanine phosphoribosyltransferase OS=Homo sapiens OX=9606 GN=HPRT1 PE=1 SV=2	sp|P00492|HPRT_HUMAN	10	188968	212000	10	159524	177000	10	298998	330000	10	170067	245000	10	146472	196000	10	253124	290000	10	147484	199000	10	289082	296000	10	190185	233000	10	206339	283000	10	265172	298000	10	208241	263000	10	229451	220000	10	163948	194000	10	181187	221000	10	255023
P00505	Aspartate aminotransferase, mitochondrial OS=Homo sapiens OX=9606 GN=GOT2 PE=1 SV=3	sp|P00505|AATM_HUMAN	1	54188	54200	1	61759	61800	1	78374	78400	1	56092	56100	1	25802	25800	1	71440	71400	1	41539	41500	1	45507	45500	1	71488	71500	1	52475	52500	1	40532	40500	1	94114	94100	1	49792	49800	1	63504	63500	1	67646	67600	1	83428
P00533	Epidermal growth factor receptor OS=Homo sapiens OX=9606 GN=EGFR PE=1 SV=2	sp|P00533|EGFR_HUMAN	1	9578	9580	1	8830	8830	1	12441	12400	1	13928	13900	1	7712	7710	1	9870	9870	1	5541	5540	1	11983	12000	1	15542	15500	1	10089	10100	1	9730	9730	1	8313	8310	1	12902	12900	1	8755	8760	1	8262	8260	1	8390
P00568	Adenylate kinase isoenzyme 1 OS=Homo sapiens OX=9606 GN=AK1 PE=1 SV=3	sp|P00568|KAD1_HUMAN	9	414235	568000	9	172474	243000	9	395643	485000	9	518524	653000	9	383473	511000	9	413522	444000	9	351711	532000	9	383598	489000	9	311211	440000	9	390877	588000	9	337654	460000	9	308463	437000	9	315933	416000	9	364734	505000	9	493943	623000	9	380623
P00813	Adenosine deaminase OS=Homo sapiens OX=9606 GN=ADA PE=1 SV=3	sp|P00813|ADA_HUMAN	3	114382	114000	3	43729	43700	3	129192	129000	3	69687	69700	3	54980	55000	3	77917	77900	3	78685	78700	3	88983	89000	3	71403	71400	3	91304	91300	3	91266	91300	3	80668	12700	3	90195	90200	3	72657	72700	3	64617	64600	3	108634
P00846	ATP synthase subunit a OS=Homo sapiens OX=9606 GN=MT-ATP6 PE=1 SV=1	sp|P00846|ATP6_HUMAN	1	68725	68700	1	62302	62300	1	117164	117000	1	79754	79800	1	50813	50800	1	112254	112000	1	89887	89900	1	102214	102000	1	80034	80000	1	91453	91500	1	101559	102000	1	81978	82000	1	86148	86100	1	133679	134000	1	82429	82400	1	90885
P00966	Argininosuccinate synthase OS=Homo sapiens OX=9606 GN=ASS1 PE=1 SV=2	sp|P00966|ASSY_HUMAN	8	63486	42200	8	50009	41600	8	78389	59400	8	26930	26900	8	44111	21300	8	53653	21700	8	44584	22900	8	135458	77400	8	54808	28800	8	66787	38300	8	66545	66500	8	78591	10500	8	81131	81100	8	50645	50600	8	49271	46100	8	92027
P01023	Alpha-2-macroglobulin OS=Homo sapiens OX=9606 GN=A2M PE=1 SV=3	sp|P01023|A2MG_HUMAN	3	21044	21000	3	13563	13600	3	22398	22400	3	17922	8360	3	3355	809	3	14050	5410	3	10825	10800	3	17029	17000	3	20625	8630	3	18037	18000	3	11522	11500	3	17408	17400	3	6581	1780	3	8197	8200	3	11798	11800	3	14753
P01024	Complement C3 OS=Homo sapiens OX=9606 GN=C3 PE=1 SV=2	sp|P01024|CO3_HUMAN	2	25173	25200	2	22837	22800	2	41638	41600	2	16696	16700	2	14306	14300	2	23605	13200	2	18746	18700	2	22804	22800	2	26438	26400	2	21001	21000	2	26056	26100	2	22017	22000	2	27221	27200	2	25951	26000	2	18882	18900	2	23704
P01033	Metalloproteinase inhibitor 1 OS=Homo sapiens OX=9606 GN=TIMP1 PE=1 SV=1	sp|P01033|TIMP1_HUMAN	7	68086	59400	7	66672	48000	7	109299	91500	7	82543	50500	7	47270	29700	7	80565	62500	7	85706	63300	7	78486	52700	7	53896	53900	7	86252	53500	7	79633	74400	7	70092	62200	7	67641	65100	7	71986	65700	7	71310	62600	7	60477
P01034	Cystatin-C OS=Homo sapiens OX=9606 GN=CST3 PE=1 SV=1	sp|P01034|CYTC_HUMAN	1	23246	23200	1	18133	#N/A	1	21612	#N/A	1	12234	12200	1	7717	#N/A	1	14310	14300	1	10640	#N/A	1	8794	#N/A	1	15770	15800	1	9039	#N/A	1	15766	15800	1	11966	12000	1	28124	28100	1	20833	20800	1	13546	#N/A	1	16329
P01111	GTPase NRas OS=Homo sapiens OX=9606 GN=NRAS PE=1 SV=1	sp|P01111|RASN_HUMAN	2	66462	66500	2	44030	#N/A	2	61377	28400	2	27191	7110	2	24995	25000	2	33034	20600	2	18305	12700	2	57156	#N/A	2	43607	31200	2	125421	125000	2	61611	#N/A	2	82943	82900	2	52895	26400	2	23954	7410	2	33884	8970	2	41306
P01137	Transforming growth factor beta-1 OS=Homo sapiens OX=9606 GN=TGFB1 PE=1 SV=2	sp|P01137|TGFB1_HUMAN	1	9093	9090	1	4270	4270	1	5781	5780	1	5932	5930	1	5088	5090	1	5217	#N/A	1	4256	4260	1	4980	#N/A	1	4659	4660	1	4345	#N/A	1	3510	3510	1	7611	7610	1	4270	4270	1	4826	4830	1	4313	4310	1	10345
P01876	Immunoglobulin heavy constant alpha 1 OS=Homo sapiens OX=9606 GN=IGHA1 PE=1 SV=2	sp|P01876|IGHA1_HUMAN	1	2677	#N/A	1	695	695	1	8903	#N/A	1	2054	2050	1	614	614	1	841	841	1	291	291	1	1833	#N/A	1	300	300	1	3093	3090	1	258	258	1	1159	1160	1	1505	#N/A	1	1163	1160	1	1620	1620	1	3379
P02452	Collagen alpha-1(I) chain OS=Homo sapiens OX=9606 GN=COL1A1 PE=1 SV=5	sp|P02452|CO1A1_HUMAN	48	3851402	5030000	48	1612891	2140000	48	2653533	3600000	48	1897882	2590000	48	2304875	3160000	48	3709569	5100000	48	3319586	4500000	48	4261252	5780000	48	3094715	4160000	48	5278119	6720000	48	4867081	6710000	48	4753873	6500000	48	7931864	11200000	48	4889101	6590000	48	3192343	4320000	48	3128511
P02461	Collagen alpha-1(III) chain OS=Homo sapiens OX=9606 GN=COL3A1 PE=1 SV=4	sp|P02461|CO3A1_HUMAN	3	24839	21300	3	19222	9960	3	18329	17200	3	12216	1620	3	24131	24100	3	17207	5610	3	36243	33700	3	33317	30000	3	19636	14400	3	12210	#N/A	3	20021	17000	3	21836	12500	3	52689	52700	3	47278	47300	3	38756	38800	3	47678
P02511	Alpha-crystallin B chain OS=Homo sapiens OX=9606 GN=CRYAB PE=1 SV=2	sp|P02511|CRYAB_HUMAN	9	321019	321000	9	190970	191000	9	1114045	1110000	9	521482	521000	9	739996	740000	9	463868	464000	9	1635778	1620000	9	416379	416000	9	519866	518000	9	606332	584000	9	885652	886000	9	326228	309000	9	1200988	1180000	9	296680	279000	9	968581	969000	9	600608
P02533	Keratin, type I cytoskeletal 14 OS=Homo sapiens OX=9606 GN=KRT14 PE=1 SV=4	sp|P02533|K1C14_HUMAN	5	34059	34100	5	67231	41900	5	969249	969000	5	31439	18700	5	20823	16300	5	34205	25700	5	34029	24600	5	36424	36400	5	29137	29100	5	19566	12100	5	25826	25800	5	22727	17000	5	25690	25700	5	25798	25800	5	25624	25400	5	40803
P02538	Keratin, type II cytoskeletal 6A OS=Homo sapiens OX=9606 GN=KRT6A PE=1 SV=3	sp|P02538|K2C6A_HUMAN	2	49350	49400	2	30625	30600	2	1186881	1190000	2	64405	64400	2	50098	50100	2	56671	56700	2	61750	61800	2	78650	78700	2	15748	15700	2	77745	77700	2	58519	58500	2	61461	61500	2	49872	49900	2	57629	57600	2	46672	46700	2	62821
P02656	Apolipoprotein C-III OS=Homo sapiens OX=9606 GN=APOC3 PE=1 SV=1	sp|P02656|APOC3_HUMAN	2	48881	97800	2	3911	7820	2	50072	100000	2	19416	38800	2	16200	32400	2	25005	50000	2	20196	40400	2	18385	36800	2	14487	29000	2	17321	34600	2	18793	37600	2	26690	53400	2	16815	33600	2	22609	45200	2	14366	28700	2	19522
P02765	Alpha-2-HS-glycoprotein OS=Homo sapiens OX=9606 GN=AHSG PE=1 SV=1	sp|P02765|FETUA_HUMAN	1	109973	110000	1	5311	5310	1	32396	32400	1	10213	10200	1	13111	13100	1	4140	4140	1	21893	21900	1	13967	14000	1	10883	10900	1	17474	17500	1	16577	16600	1	8407	8410	1	8710	8710	1	7657	7660	1	5806	5810	1	6400
P02768	Serum albumin OS=Homo sapiens OX=9606 GN=ALB PE=1 SV=2	sp|P02768|ALBU_HUMAN	1	39846	39800	1	6210	6210	1	18013	18000	1	8100	8100	1	3745	#N/A	1	6393	6390	1	6327	#N/A	1	7883	7880	1	4826	4830	1	19531	#N/A	1	13375	13400	1	6871	6870	1	4077	4080	1	6257	#N/A	1	13565	#N/A	1	11358
P02786	Transferrin receptor protein 1 OS=Homo sapiens OX=9606 GN=TFRC PE=1 SV=2	sp|P02786|TFR1_HUMAN	11	136313	99100	11	59578	36900	11	100233	38000	11	60280	36200	11	39673	54700	11	72070	39700	11	59073	79500	11	77749	59100	11	65883	86900	11	96877	124000	11	109546	131000	11	90678	115000	11	63305	19900	11	63401	48100	11	62614	27700	11	92352
P02792	Ferritin light chain OS=Homo sapiens OX=9606 GN=FTL PE=1 SV=2	sp|P02792|FRIL_HUMAN	1	42240	42200	1	19772	19800	1	37614	37600	1	19763	19800	1	19287	19300	1	23785	23800	1	37472	37500	1	20249	20200	1	41407	41400	1	19869	19900	1	44755	44800	1	14452	14500	1	61108	61100	1	19116	19100	1	17631	17600	1	16693
P02794	Ferritin heavy chain OS=Homo sapiens OX=9606 GN=FTH1 PE=1 SV=2	sp|P02794|FRIH_HUMAN	1	956	956	1	2992	2990	1	4181	4180	1	2067	2070	1	1122	#N/A	1	3402	3400	1	3484	3480	1	937	937	1	1288	1290	1	1380	1380	1	1070	#N/A	1	1564	1560	1	2833	2830	1	890	890	1	1325	1330	1	2808
P02795	Metallothionein-2 OS=Homo sapiens OX=9606 GN=MT2A PE=1 SV=1	sp|P02795|MT2_HUMAN	1	2120	2120	1	3216	3220	1	16453	16500	1	4692	4690	1	337	337	1	1097	1100	1	2659	2660	1	1551	1550	1	720	720	1	971	971	1	443	443	1	1653	1650	1	790	790	1	4093	4090	1	1172	1170	1	3623
P03897	NADH-ubiquinone oxidoreductase chain 3 OS=Homo sapiens OX=9606 GN=MT-ND3 PE=1 SV=1	sp|P03897|NU3M_HUMAN	1	5298	5300	1	2778	2780	1	5558	5560	1	1960	1960	1	4511	4510	1	1856	1860	1	3094	3090	1	1129	1130	1	5937	5940	1	3962	3960	1	1856	1860	1	2197	2200	1	4252	4250	1	8197	8200	1	5413	5410	1	2190
P03905	NADH-ubiquinone oxidoreductase chain 4 OS=Homo sapiens OX=9606 GN=MT-ND4 PE=1 SV=1	sp|P03905|NU4M_HUMAN	1	163184	163000	1	166303	166000	1	130889	131000	1	189754	190000	1	141459	141000	1	2517	2520	1	171056	171000	1	106395	106000	1	4124	4120	1	50175	50200	1	189989	190000	1	70939	70900	1	203542	204000	1	185022	185000	1	163019	163000	1	112495
P03928	ATP synthase protein 8 OS=Homo sapiens OX=9606 GN=MT-ATP8 PE=1 SV=1	sp|P03928|ATP8_HUMAN	2	23621	23600	2	9848	332	2	26807	1070	2	1753	1750	2	2270	#N/A	2	8883	#N/A	2	7603	554	2	12330	12300	2	15869	625	2	4968	4970	2	9634	9630	2	3228	3230	2	7396	951	2	13211	483	2	18154	1280	2	32289
P04004	Vitronectin OS=Homo sapiens OX=9606 GN=VTN PE=1 SV=1	sp|P04004|VTNC_HUMAN	1	49436	49400	1	7843	7840	1	14898	14900	1	25304	25300	1	39876	39900	1	58762	58800	1	38028	38000	1	41052	41100	1	21308	21300	1	59949	59900	1	22181	22200	1	46361	46400	1	45269	45300	1	19373	19400	1	51314	51300	1	13084
P04040	Catalase OS=Homo sapiens OX=9606 GN=CAT PE=1 SV=3	sp|P04040|CATA_HUMAN	14	143568	169000	14	120827	169000	14	208840	275000	14	133561	147000	14	108318	130000	14	160733	214000	14	131159	164000	14	128105	159000	14	126223	154000	14	205383	250000	14	136771	163000	14	136935	123000	14	134583	176000	14	125902	154000	14	142508	157000	14	193995
P04080	Cystatin-B OS=Homo sapiens OX=9606 GN=CSTB PE=1 SV=2	sp|P04080|CYTB_HUMAN	5	158431	221000	5	116786	158000	5	223884	300000	5	135103	184000	5	98398	132000	5	203836	247000	5	159763	206000	5	167150	215000	5	145717	182000	5	110001	149000	5	214524	280000	5	184721	247000	5	137962	187000	5	244054	299000	5	173817	228000	5	208264
P04083	Annexin A1 OS=Homo sapiens OX=9606 GN=ANXA1 PE=1 SV=2	sp|P04083|ANXA1_HUMAN	28	5867750	10100000	28	3662141	6630000	28	7132240	12500000	28	6224893	11800000	28	5122336	9780000	28	6803456	12000000	28	5522194	10000000	28	7961093	14100000	28	6104260	10600000	28	6371826	11700000	28	5753113	10500000	28	6087707	10600000	28	4463916	7810000	28	4378799	7840000	28	5517991	9720000	28	6569861
P04114	Apolipoprotein B-100 OS=Homo sapiens OX=9606 GN=APOB PE=1 SV=2	sp|P04114|APOB_HUMAN	1	49454	49500	1	36436	#N/A	1	32061	32100	1	25576	#N/A	1	6066	6070	1	5077	5080	1	10433	10400	1	14249	14200	1	7355	#N/A	1	9576	#N/A	1	6061	6060	1	16871	#N/A	1	33776	#N/A	1	10742	10700	1	3968	3970	1	32351
P04181	Ornithine aminotransferase, mitochondrial OS=Homo sapiens OX=9606 GN=OAT PE=1 SV=1	sp|P04181|OAT_HUMAN	6	103552	117000	6	66913	47400	6	188160	143000	6	95793	94200	6	46494	47800	6	80766	88400	6	71531	54800	6	105990	61300	6	91503	95400	6	63391	63400	6	92967	82800	6	89143	58500	6	111145	73200	6	105639	64600	6	84314	36400	6	104611
P04183	Thymidine kinase, cytosolic OS=Homo sapiens OX=9606 GN=TK1 PE=1 SV=2	sp|P04183|KITH_HUMAN	1	5289	5290	1	9322	#N/A	1	18452	18500	1	14873	14900	1	10623	10600	1	14952	15000	1	5364	#N/A	1	16334	16300	1	13546	13500	1	12096	12100	1	13846	#N/A	1	7785	#N/A	1	11137	11100	1	9494	#N/A	1	24549	24500	1	22769
P04216	Thy-1 membrane glycoprotein OS=Homo sapiens OX=9606 GN=THY1 PE=1 SV=2	sp|P04216|THY1_HUMAN	5	777793	1500000	5	409142	767000	5	907562	1690000	5	403724	747000	5	584404	1080000	5	1166221	2200000	5	833452	1570000	5	1303064	2440000	5	743600	1390000	5	1875910	3520000	5	1417867	2630000	5	578632	1100000	5	786265	1450000	5	970632	1800000	5	942523	1740000	5	807902
P04259	Keratin, type II cytoskeletal 6B OS=Homo sapiens OX=9606 GN=KRT6B PE=1 SV=5	sp|P04259|K2C6B_HUMAN	2	4495	4490	2	3940	3940	2	274130	274000	2	4741	4740	2	3922	3920	2	2465	2460	2	4447	4450	2	4393	4390	2	4936	4940	2	6897	6900	2	6434	6430	2	2983	2980	2	8993	332	2	2396	2400	2	3588	3590	2	6492
P04264	Keratin, type II cytoskeletal 1 OS=Homo sapiens OX=9606 GN=KRT1 PE=1 SV=6	sp|P04264|K2C1_HUMAN	24	1145137	1810000	24	1413285	3510000	24	34490718	57000000	24	539784	1050000	24	234240	365000	24	630113	1010000	24	482468	1020000	24	684156	1120000	24	870025	1970000	24	598921	1470000	24	805922	1790000	24	732762	1520000	24	289201	442000	24	1201378	1810000	24	214960	340000	24	1079640
P04350	Tubulin beta-4A chain OS=Homo sapiens OX=9606 GN=TUBB4A PE=1 SV=2	sp|P04350|TBB4A_HUMAN	2	15905	31800	2	45626	91300	2	272131	544000	2	59507	119000	2	31988	64000	2	261300	523000	2	161194	322000	2	241999	484000	2	174442	349000	2	165586	331000	2	160194	320000	2	165626	331000	2	213327	427000	2	56424	113000	2	52998	106000	2	259094
P04406	Glyceraldehyde-3-phosphate dehydrogenase OS=Homo sapiens OX=9606 GN=GAPDH PE=1 SV=3	sp|P04406|G3P_HUMAN	2	1237523	1240000	2	662447	662000	2	1119965	1120000	2	770136	770000	2	461816	462000	2	1168820	1170000	2	621232	621000	2	915948	916000	2	825424	825000	2	917334	917000	2	973712	974000	2	708121	708000	2	909042	909000	2	1041047	1040000	2	700680	701000	2	912255
P04439	HLA class I histocompatibility antigen, A-3 alpha chain OS=Homo sapiens OX=9606 GN=HLA-A PE=1 SV=2	sp|P04439|1A03_HUMAN	1	2768	2770	1	4032	4030	1	4356	4360	1	6287	6290	1	2038	2040	1	5366	5370	1	2997	3000	1	4255	4260	1	2579	2580	1	4397	#N/A	1	8279	8280	1	7230	7230	1	1786	1790	1	1539	1540	1	1942	1940	1	8551
P04632	Calpain small subunit 1 OS=Homo sapiens OX=9606 GN=CAPNS1 PE=1 SV=1	sp|P04632|CPNS1_HUMAN	11	557109	995000	11	557886	1040000	11	617171	1000000	11	742759	1280000	11	489347	842000	11	571457	920000	11	431650	705000	11	542635	890000	11	475779	762000	11	462376	735000	11	529046	894000	11	442650	725000	11	423485	664000	11	476531	789000	11	426817	710000	11	566017
P04792	Heat shock protein beta-1 OS=Homo sapiens OX=9606 GN=HSPB1 PE=1 SV=2	sp|P04792|HSPB1_HUMAN	12	11458008	19500000	12	4639728	7690000	12	10218210	16300000	12	5323914	8580000	12	4910017	7970000	12	7345359	11600000	12	5330557	8650000	12	7108794	11400000	12	5787696	9390000	12	6041033	9740000	12	6252821	10200000	12	7549997	12100000	12	8575599	13500000	12	8009229	12700000	12	6007833	9780000	12	7487001
P04818	Thymidylate synthase OS=Homo sapiens OX=9606 GN=TYMS PE=1 SV=3	sp|P04818|TYSY_HUMAN	1	43593	43600	1	58677	58700	1	123960	124000	1	7393	7390	1	54693	54700	1	124279	124000	1	76325	76300	1	117848	118000	1	91577	91600	1	103869	104000	1	95257	95300	1	100035	100000	1	73937	73900	1	104695	105000	1	68717	68700	1	100894
P04843	Dolichyl-diphosphooligosaccharide--protein glycosyltransferase subunit 1 OS=Homo sapiens OX=9606 GN=RPN1 PE=1 SV=1	sp|P04843|RPN1_HUMAN	29	2974599	5290000	29	1346053	2370000	29	2901879	5030000	29	1881156	3270000	29	1555134	2680000	29	2619237	4540000	29	1976964	3410000	29	2769670	4780000	29	2068764	3610000	29	2684460	4730000	29	2488063	4380000	29	2311242	4010000	29	2456574	4150000	29	2752277	4740000	29	2091028	3620000	29	2732872
P05109	Protein S100-A8 OS=Homo sapiens OX=9606 GN=S100A8 PE=1 SV=1	sp|P05109|S10A8_HUMAN	1	6674	6670	1	7484	7480	1	62667	#N/A	1	2808	2810	1	2437	2440	1	11360	11400	1	3943	3940	1	5313	5310	1	4132	#N/A	1	5886	#N/A	1	3637	3640	1	1889	1890	1	3989	3990	1	3245	3250	1	4265	4260	1	6108
P05120	Plasminogen activator inhibitor 2 OS=Homo sapiens OX=9606 GN=SERPINB2 PE=1 SV=2	sp|P05120|PAI2_HUMAN	1	18608	18600	1	10834	10800	1	13657	13700	1	10706	10700	1	7455	7450	1	11089	11100	1	12356	12400	1	29682	29700	1	12975	13000	1	53644	53600	1	31773	31800	1	9487	9490	1	10800	10800	1	15682	15700	1	12475	12500	1	9751
P05121	Plasminogen activator inhibitor 1 OS=Homo sapiens OX=9606 GN=SERPINE1 PE=1 SV=1	sp|P05121|PAI1_HUMAN	1	1506	1510	1	587	587	1	10212	10200	1	2271	2270	1	393	393	1	890	890	1	1108	1110	1	1823	1820	1	448	448	1	1108	1110	1	1611	1610	1	1319	1320	1	4767	4770	1	4099	4100	1	332	332	1	1832
P05141	ADP/ATP translocase 2 OS=Homo sapiens OX=9606 GN=SLC25A5 PE=1 SV=7	sp|P05141|ADT2_HUMAN	3	193247	193000	3	325848	326000	3	511769	512000	3	334311	334000	3	176579	167000	3	405576	406000	3	292489	278000	3	320527	321000	3	328342	311000	3	263398	263000	3	301999	302000	3	323491	306000	3	361812	362000	3	308663	309000	3	276749	268000	3	492737
P05161	Ubiquitin-like protein ISG15 OS=Homo sapiens OX=9606 GN=ISG15 PE=1 SV=5	sp|P05161|ISG15_HUMAN	2	6013	6010	2	1755	1760	2	1551	1550	2	1057	1060	2	1608	1220	2	3159	995	2	1011	1010	2	1023	1020	2	3008	554	2	2270	2270	2	4614	4610	2	1836	1840	2	3675	#N/A	2	4915	4920	2	1134	1130	2	4105
P05198	Eukaryotic translation initiation factor 2 subunit 1 OS=Homo sapiens OX=9606 GN=EIF2S1 PE=1 SV=3	sp|P05198|IF2A_HUMAN	11	716734	1170000	11	626738	1050000	11	888223	1430000	11	711349	1190000	11	624153	1070000	11	704621	1000000	11	582537	934000	11	681046	1070000	11	634060	940000	11	706803	1050000	11	736743	1190000	11	701428	1030000	11	370487	455000	11	605219	1020000	11	692709	1130000	11	759276
P05204	Non-histone chromosomal protein HMG-17 OS=Homo sapiens OX=9606 GN=HMGN2 PE=1 SV=3	sp|P05204|HMGN2_HUMAN	1	13743	13700	1	9896	9900	1	16093	16100	1	14493	14500	1	4671	4670	1	7421	7420	1	3667	3670	1	12863	12900	1	5638	5640	1	2098	2100	1	3900	3900	1	5245	5240	1	3667	3670	1	1669	1670	1	8026	8030	1	11519
P05386	60S acidic ribosomal protein P1 OS=Homo sapiens OX=9606 GN=RPLP1 PE=1 SV=1	sp|P05386|RLA1_HUMAN	2	1929188	3860000	2	1484225	2970000	2	1756395	3510000	2	1677678	3360000	2	911089	1820000	2	1899672	3800000	2	1357334	2710000	2	1809975	3620000	2	1512726	3030000	2	1706614	3410000	2	1738481	3480000	2	1864197	3730000	2	1656177	3310000	2	948787	1900000	2	1407290	2810000	2	2013765
P05387	60S acidic ribosomal protein P2 OS=Homo sapiens OX=9606 GN=RPLP2 PE=1 SV=1	sp|P05387|RLA2_HUMAN	4	204820	259000	4	371346	540000	4	1454384	2070000	4	791492	1080000	4	497408	659000	4	1125155	1710000	4	762311	1120000	4	955696	1400000	4	801108	1100000	4	968123	1370000	4	745890	1080000	4	889266	1260000	4	1190082	1710000	4	970255	1410000	4	658572	944000	4	1103479
P05412	Transcription factor AP-1 OS=Homo sapiens OX=9606 GN=JUN PE=1 SV=2	sp|P05412|JUN_HUMAN	3	45852	45900	3	29166	29200	3	142504	143000	3	64321	64300	3	23118	23100	3	49954	45100	3	23303	23300	3	43772	43800	3	47232	37900	3	38509	38500	3	32711	32700	3	46163	41400	3	49250	33200	3	40987	41000	3	51414	31800	3	72482
P05413	Fatty acid-binding protein, heart OS=Homo sapiens OX=9606 GN=FABP3 PE=1 SV=4	sp|P05413|FABPH_HUMAN	3	14149	14100	3	15367	13300	3	12042	9130	3	5845	3520	3	9048	7490	3	14537	9090	3	9664	9660	3	23890	17100	3	9534	9530	3	12301	12300	3	10582	10600	3	6657	6660	3	11201	11200	3	7054	7050	3	14107	14100	3	18152
P05455	Lupus La protein OS=Homo sapiens OX=9606 GN=SSB PE=1 SV=2	sp|P05455|LA_HUMAN	8	248324	362000	8	339659	475000	8	297263	463000	8	246423	364000	8	183215	261000	8	333683	499000	8	210747	299000	8	282895	423000	8	185860	280000	8	220215	337000	8	237360	369000	8	264573	428000	8	260047	395000	8	315005	477000	8	202350	325000	8	254706
P05556	Integrin beta-1 OS=Homo sapiens OX=9606 GN=ITGB1 PE=1 SV=2	sp|P05556|ITB1_HUMAN	2	396085	396000	2	207677	208000	2	418798	419000	2	285153	285000	2	133415	133000	2	291025	291000	2	251900	252000	2	260035	260000	2	222783	223000	2	280041	280000	2	273386	273000	2	210198	210000	2	203948	204000	2	272267	272000	2	209531	210000	2	258014
P05783	Keratin, type I cytoskeletal 18 OS=Homo sapiens OX=9606 GN=KRT18 PE=1 SV=2	sp|P05783|K1C18_HUMAN	4	50834	35100	4	83887	83900	4	69587	69600	4	28091	28100	4	16085	15200	4	60864	60900	4	25240	22700	4	42936	42900	4	41809	41800	4	26331	26300	4	44435	44400	4	136145	136000	4	68839	68800	4	96644	95000	4	47401	47400	4	37861
P05997	Collagen alpha-2(V) chain OS=Homo sapiens OX=9606 GN=COL5A2 PE=1 SV=3	sp|P05997|CO5A2_HUMAN	14	208691	165000	14	107833	58700	14	193224	152000	14	80611	58100	14	53030	44100	14	157549	84700	14	72580	55100	14	177672	87700	14	91513	70100	14	110020	76800	14	154240	70700	14	130715	94300	14	221213	146000	14	108760	76000	14	135305	89900	14	133312
P06132	Uroporphyrinogen decarboxylase OS=Homo sapiens OX=9606 GN=UROD PE=1 SV=2	sp|P06132|DCUP_HUMAN	10	129442	206000	10	88093	139000	10	134718	201000	10	106180	142000	10	51034	78700	10	126773	190000	10	77527	115000	10	130223	176000	10	84634	120000	10	120808	196000	10	116660	175000	10	85968	109000	10	91202	144000	10	83635	128000	10	81065	121000	10	90660
P06280	Alpha-galactosidase A OS=Homo sapiens OX=9606 GN=GLA PE=1 SV=1	sp|P06280|AGAL_HUMAN	1	58525	58500	1	46933	46900	1	64384	64400	1	45963	46000	1	28649	28600	1	54509	54500	1	33242	33200	1	39801	39800	1	44655	44700	1	49665	49700	1	46602	46600	1	52179	52200	1	35854	35900	1	40227	40200	1	40179	40200	1	65356
P06396-3	Isoform 3 of Gelsolin OS=Homo sapiens OX=9606 GN=GSN	sp|P06396-3|GELS_HUMAN	1	34081	34100	1	13035	13000	1	43053	43100	1	16500	16500	1	19804	19800	1	39062	39100	1	32759	32800	1	43334	43300	1	28080	28100	1	26681	26700	1	34226	34200	1	30217	30200	1	23909	23900	1	9852	9850	1	41969	42000	1	46331
P06400	Retinoblastoma-associated protein OS=Homo sapiens OX=9606 GN=RB1 PE=1 SV=2	sp|P06400|RB_HUMAN	1	19197	#N/A	1	6329	6330	1	11232	11200	1	12206	12200	1	13085	13100	1	22494	22500	1	13140	13100	1	12867	12900	1	9045	9040	1	18027	18000	1	14800	14800	1	18280	18300	1	7672	7670	1	18037	18000	1	8648	8650	1	5248
P06493	Cyclin-dependent kinase 1 OS=Homo sapiens OX=9606 GN=CDK1 PE=1 SV=3	sp|P06493|CDK1_HUMAN	1	3171	3170	1	3203	3200	1	9828	#N/A	1	5444	5440	1	836	836	1	3232	3230	1	2349	2350	1	3850	3850	1	2731	2730	1	2531	2530	1	6811	6810	1	3659	3660	1	4442	#N/A	1	4978	4980	1	4651	4650	1	2912
P06576	ATP synthase subunit beta, mitochondrial OS=Homo sapiens OX=9606 GN=ATP5F1B PE=1 SV=3	sp|P06576|ATPB_HUMAN	42	7003296	11800000	42	4058094	6880000	42	7413589	12400000	42	5148236	8970000	42	3085199	5340000	42	6548521	11100000	42	4773787	8200000	42	6145496	10500000	42	5084248	8690000	42	5879923	10100000	42	5746597	9840000	42	5599542	9470000	42	4914072	8350000	42	7234406	12400000	42	4749289	8160000	42	6225595
P06702	Protein S100-A9 OS=Homo sapiens OX=9606 GN=S100A9 PE=1 SV=1	sp|P06702|S10A9_HUMAN	1	4347	4350	1	4402	4400	1	4104	4100	1	868	868	1	2519	2520	1	3934	3930	1	3877	3880	1	5105	5110	1	6647	#N/A	1	2056	2060	1	1176	1180	1	5696	5700	1	4915	#N/A	1	2721	2720	1	1827	1830	1	2276
P06703	Protein S100-A6 OS=Homo sapiens OX=9606 GN=S100A6 PE=1 SV=1	sp|P06703|S10A6_HUMAN	3	1309207	1310000	3	768834	769000	3	1552141	1550000	3	1207694	1210000	3	919937	920000	3	1318073	1320000	3	1200813	1200000	3	1954182	1950000	3	1295178	1300000	3	1761090	1760000	3	1486901	1490000	3	1267835	1270000	3	1428274	1430000	3	1167705	1170000	3	1095330	1100000	3	1805222
P06733	Alpha-enolase OS=Homo sapiens OX=9606 GN=ENO1 PE=1 SV=2	sp|P06733|ENOA_HUMAN	5	2889446	4600000	5	2283006	3520000	5	3970587	6180000	5	2528765	3970000	5	1983476	3130000	5	3355683	5400000	5	2386341	3710000	5	3365737	5320000	5	2903496	4590000	5	3631334	5680000	5	2629576	4320000	5	3658348	5710000	5	2667510	4180000	5	2053135	3340000	5	3058544	4800000	5	3667167
P06744	Glucose-6-phosphate isomerase OS=Homo sapiens OX=9606 GN=GPI PE=1 SV=4	sp|P06744|G6PI_HUMAN	2	86809	174000	2	53759	108000	2	114570	229000	2	138231	276000	2	93367	187000	2	102360	205000	2	114787	230000	2	112538	225000	2	69792	140000	2	200017	400000	2	157664	315000	2	63239	126000	2	68674	137000	2	72696	145000	2	83611	167000	2	86363
P06746	DNA polymerase beta OS=Homo sapiens OX=9606 GN=POLB PE=1 SV=3	sp|P06746|DPOLB_HUMAN	1	2735	2730	1	3753	#N/A	1	6855	6860	1	1013	1010	1	1083	1080	1	3165	3160	1	2590	2590	1	1745	1750	1	1744	1740	1	2631	2630	1	1912	1910	1	2151	2150	1	2608	2610	1	896	896	1	1884	1880	1	2268
P06865	Beta-hexosaminidase subunit alpha OS=Homo sapiens OX=9606 GN=HEXA PE=1 SV=2	sp|P06865|HEXA_HUMAN	6	128269	99600	6	128807	125000	6	144986	131000	6	150774	151000	6	92894	91400	6	188388	188000	6	111990	107000	6	197029	197000	6	136192	130000	6	159829	152000	6	127537	116000	6	194026	194000	6	127448	118000	6	187109	187000	6	150944	139000	6	135652
P07099	Epoxide hydrolase 1 OS=Homo sapiens OX=9606 GN=EPHX1 PE=1 SV=1	sp|P07099|HYEP_HUMAN	6	132496	104000	6	102019	65800	6	175288	146000	6	88915	73800	6	71029	71000	6	157428	105000	6	104931	105000	6	132219	93300	6	99189	99200	6	150415	133000	6	140935	141000	6	91912	91900	6	135712	76400	6	192126	181000	6	138155	93100	6	112172
P07195	L-lactate dehydrogenase B chain OS=Homo sapiens OX=9606 GN=LDHB PE=1 SV=2	sp|P07195|LDHB_HUMAN	19	2075286	2640000	19	1712395	1980000	19	2791094	2950000	19	2025474	2620000	19	1295375	1660000	19	2476082	2910000	19	1891769	2360000	19	2544700	2880000	19	2018595	2360000	19	2584715	3250000	19	2283288	2990000	19	2734875	3020000	19	2405592	2710000	19	1771402	2100000	19	1924347	2250000	19	2486435
P07197	Neurofilament medium polypeptide OS=Homo sapiens OX=9606 GN=NEFM PE=1 SV=3	sp|P07197|NFM_HUMAN	1	14256	14300	1	8474	8470	1	8039	8040	1	8979	8980	1	9171	#N/A	1	30303	#N/A	1	17749	17700	1	19638	19600	1	5411	5410	1	18402	#N/A	1	7512	7510	1	9686	#N/A	1	25986	26000	1	8735	8740	1	15327	15300	1	17120
P07199	Major centromere autoantigen B OS=Homo sapiens OX=9606 GN=CENPB PE=1 SV=2	sp|P07199|CENPB_HUMAN	2	15937	11700	2	9094	9090	2	15955	16000	2	5332	5330	2	8971	8970	2	17625	17600	2	4178	4180	2	16597	14300	2	7952	7950	2	8742	7570	2	9486	8070	2	19979	20000	2	9162	9160	2	7353	7350	2	8616	5300	2	25343
P07203	Glutathione peroxidase 1 OS=Homo sapiens OX=9606 GN=GPX1 PE=1 SV=4	sp|P07203|GPX1_HUMAN	6	127675	114000	6	87204	88300	6	157752	164000	6	99291	89400	6	96097	92300	6	121870	114000	6	106354	110000	6	130650	38500	6	125780	119000	6	151525	147000	6	87416	90500	6	97777	79500	6	92947	95400	6	115286	116000	6	117555	122000	6	157658
P07205	Phosphoglycerate kinase 2 OS=Homo sapiens OX=9606 GN=PGK2 PE=1 SV=3	sp|P07205|PGK2_HUMAN	1	5583	5580	1	562	562	1	2948	2950	1	2002	2000	1	3105	3110	1	989	989	1	2463	2460	1	2787	2790	1	621	621	1	2732	2730	1	887	887	1	2116	2120	1	1101	1100	1	1222	1220	1	2122	2120	1	4238
P07237	Protein disulfide-isomerase OS=Homo sapiens OX=9606 GN=P4HB PE=1 SV=3	sp|P07237|PDIA1_HUMAN	28	5112622	7000000	28	2902564	4090000	28	6825208	9800000	28	4793877	6920000	28	4103361	5900000	28	6107057	8740000	28	5300602	7560000	28	6526170	9240000	28	4907646	6930000	28	7696403	11200000	28	5797101	8350000	28	5431259	7690000	28	6910692	9880000	28	8389799	12100000	28	4914781	7050000	28	6521907
P07339	Cathepsin D OS=Homo sapiens OX=9606 GN=CTSD PE=1 SV=1	sp|P07339|CATD_HUMAN	19	2148755	2950000	19	873082	1140000	19	1437363	1920000	19	930837	1240000	19	1210712	1630000	19	1282653	1710000	19	1084900	1420000	19	1422882	1880000	19	1203213	1640000	19	1652949	2220000	19	1104100	1500000	19	1502758	1990000	19	1502330	1980000	19	1847036	2490000	19	1161488	1550000	19	1731569
P07384	Calpain-1 catalytic subunit OS=Homo sapiens OX=9606 GN=CAPN1 PE=1 SV=1	sp|P07384|CAN1_HUMAN	17	490706	455000	17	344737	320000	17	579333	561000	17	507670	494000	17	227744	238000	17	536544	466000	17	263738	266000	17	426768	396000	17	404649	417000	17	375909	340000	17	455012	417000	17	441072	423000	17	316344	318000	17	348450	304000	17	366168	342000	17	367520
P07437	Tubulin beta chain OS=Homo sapiens OX=9606 GN=TUBB PE=1 SV=2	sp|P07437|TBB5_HUMAN	11	7902286	18000000	11	5061212	11700000	11	11606141	26600000	11	7383601	16900000	11	4458338	10200000	11	8808072	20200000	11	5956510	13600000	11	8064614	18500000	11	6957265	16000000	11	7474119	17100000	11	6894398	16000000	11	8102511	18600000	11	7721343	17700000	11	6027337	14000000	11	6786770	15700000	11	9141987
P07585	Decorin OS=Homo sapiens OX=9606 GN=DCN PE=1 SV=1	sp|P07585|PGS2_HUMAN	2	22892	45800	2	5366	10700	2	30111	60200	2	8059	16100	2	7021	14000	2	41754	83500	2	32601	65200	2	27281	54600	2	20595	41200	2	25326	50700	2	19240	#N/A	2	10791	21600	2	24099	48200	2	14328	28700	2	21404	42800	2	16738
P07602	Prosaposin OS=Homo sapiens OX=9606 GN=PSAP PE=1 SV=2	sp|P07602|SAP_HUMAN	1	7378	7380	1	5985	5990	1	14870	14900	1	8582	8580	1	8670	8670	1	8748	8750	1	12509	12500	1	7589	7590	1	7594	7590	1	18863	18900	1	9477	9480	1	7996	8000	1	11093	11100	1	10320	10300	1	4879	4880	1	3088
P07686	Beta-hexosaminidase subunit beta OS=Homo sapiens OX=9606 GN=HEXB PE=1 SV=3	sp|P07686|HEXB_HUMAN	9	198208	192000	9	111886	131000	9	180782	160000	9	154439	215000	9	94707	93800	9	122215	143000	9	78691	77300	9	184947	184000	9	159376	200000	9	116761	138000	9	122112	125000	9	142482	132000	9	126756	96300	9	141147	116000	9	136750	156000	9	169010
P07711	Cathepsin L1 OS=Homo sapiens OX=9606 GN=CTSL PE=1 SV=2	sp|P07711|CATL1_HUMAN	4	142818	143000	4	78042	78000	4	73293	73300	4	54816	54800	4	80571	80600	4	107989	108000	4	89944	89900	4	142139	142000	4	107508	108000	4	139563	132000	4	147011	137000	4	135685	136000	4	130680	131000	4	119816	120000	4	117341	117000	4	127151
P07737	Profilin-1 OS=Homo sapiens OX=9606 GN=PFN1 PE=1 SV=2	sp|P07737|PROF1_HUMAN	13	7807490	13500000	13	5618128	9370000	13	11119130	18500000	13	7457881	12200000	13	5333864	8850000	13	10148255	16700000	13	7264340	12000000	13	9719111	15900000	13	7622177	12500000	13	8365377	13800000	13	7536803	12500000	13	7998798	13200000	13	8829111	14500000	13	7921547	13100000	13	7629413	12700000	13	9362979
P07738	Bisphosphoglycerate mutase OS=Homo sapiens OX=9606 GN=BPGM PE=1 SV=2	sp|P07738|PMGE_HUMAN	1	3238	3240	1	3827	3830	1	1277	#N/A	1	1116	1120	1	984	984	1	621	#N/A	1	942	942	1	2035	#N/A	1	432	#N/A	1	3360	#N/A	1	1917	#N/A	1	2375	#N/A	1	977	977	1	553	553	1	597	597	1	2685
P07741	Adenine phosphoribosyltransferase OS=Homo sapiens OX=9606 GN=APRT PE=1 SV=2	sp|P07741|APT_HUMAN	5	78609	149000	5	44945	83100	5	85517	164000	5	77129	151000	5	70032	135000	5	61759	117000	5	88871	172000	5	71887	135000	5	56705	107000	5	103026	196000	5	90165	170000	5	73891	140000	5	52625	97700	5	75194	142000	5	45268	89800	5	58392
P07814	Bifunctional glutamate/proline--tRNA ligase OS=Homo sapiens OX=9606 GN=EPRS PE=1 SV=5	sp|P07814|SYEP_HUMAN	53	1570867	2100000	53	910348	1170000	53	1907184	1790000	53	1013245	1300000	53	768619	1070000	53	1302821	1640000	53	1128256	1410000	53	1476035	1800000	53	1012835	1280000	53	1490686	2010000	53	1439678	1660000	53	1377452	1640000	53	1507965	1740000	53	1219974	1460000	53	1171345	1390000	53	1520630
P07858	Cathepsin B OS=Homo sapiens OX=9606 GN=CTSB PE=1 SV=3	sp|P07858|CATB_HUMAN	18	1599136	2870000	18	703080	1330000	18	1461950	2770000	18	1141021	2190000	18	858676	1630000	18	1599441	3110000	18	1575278	2970000	18	1357209	2630000	18	1256888	2400000	18	1910973	3800000	18	1605721	3190000	18	1584463	3110000	18	1499344	3020000	18	2981917	6060000	18	1298981	2510000	18	1247096
P07919	Cytochrome b-c1 complex subunit 6, mitochondrial OS=Homo sapiens OX=9606 GN=UQCRH PE=1 SV=2	sp|P07919|QCR6_HUMAN	3	144212	433000	3	76847	231000	3	122912	369000	3	105077	315000	3	64568	194000	3	106966	321000	3	81957	246000	3	112541	338000	3	82012	246000	3	122034	366000	3	116986	351000	3	101755	305000	3	112055	336000	3	117611	353000	3	109161	327000	3	110066
P07942	Laminin subunit beta-1 OS=Homo sapiens OX=9606 GN=LAMB1 PE=1 SV=2	sp|P07942|LAMB1_HUMAN	17	282268	386000	17	155122	206000	17	398150	543000	17	182591	213000	17	172987	226000	17	315361	391000	17	195330	245000	17	231891	278000	17	168644	202000	17	300191	394000	17	180621	211000	17	311367	384000	17	229019	282000	17	221938	301000	17	145338	214000	17	286858
P07947	Tyrosine-protein kinase Yes OS=Homo sapiens OX=9606 GN=YES1 PE=1 SV=3	sp|P07947|YES_HUMAN	6	125000	125000	6	214127	10500	6	83064	81300	6	208350	204000	6	89824	89000	6	245319	4060	6	197309	5720	6	294913	41800	6	43078	40800	6	200665	186000	6	275684	276000	6	207337	36500	6	263171	30400	6	56389	55900	6	260445	260000	6	300926
P07951	Tropomyosin beta chain OS=Homo sapiens OX=9606 GN=TPM2 PE=1 SV=1	sp|P07951|TPM2_HUMAN	1	47887	47900	1	3714	3710	1	30503	30500	1	12020	12000	1	8271	8270	1	16091	16100	1	15829	15800	1	25277	25300	1	15162	15200	1	18584	18600	1	22701	22700	1	22061	22100	1	35889	35900	1	35847	35800	1	14202	14200	1	12951
P07996	Thrombospondin-1 OS=Homo sapiens OX=9606 GN=THBS1 PE=1 SV=2	sp|P07996|TSP1_HUMAN	1	175373	175000	1	128131	128000	1	164722	165000	1	104822	105000	1	116209	116000	1	194096	194000	1	212844	213000	1	305329	305000	1	185594	186000	1	262995	263000	1	230482	230000	1	125715	126000	1	281609	282000	1	256819	257000	1	210795	211000	1	178154
P08123	Collagen alpha-2(I) chain OS=Homo sapiens OX=9606 GN=COL1A2 PE=1 SV=7	sp|P08123|CO1A2_HUMAN	48	2896830	4150000	48	1145767	1690000	48	2046676	2920000	48	1308849	1880000	48	1459055	2110000	48	2575214	3520000	48	2067297	3010000	48	3005555	4310000	48	2068357	2960000	48	3424921	4870000	48	3090200	4340000	48	3268670	4650000	48	4670032	6590000	48	3327251	4760000	48	2086272	2910000	48	2294203
P08133	Annexin A6 OS=Homo sapiens OX=9606 GN=ANXA6 PE=1 SV=3	sp|P08133|ANXA6_HUMAN	2	92521	185000	2	63515	127000	2	179754	360000	2	102737	205000	2	83998	168000	2	138092	276000	2	132748	266000	2	121978	244000	2	110439	221000	2	122102	244000	2	100967	202000	2	114524	229000	2	176416	353000	2	150375	301000	2	124812	250000	2	140962
P08134	Rho-related GTP-binding protein RhoC OS=Homo sapiens OX=9606 GN=RHOC PE=1 SV=1	sp|P08134|RHOC_HUMAN	2	450643	451000	2	219586	220000	2	467310	467000	2	351603	352000	2	207399	207000	2	397069	397000	2	306513	307000	2	349427	349000	2	278957	279000	2	331510	332000	2	355798	356000	2	370131	370000	2	358378	358000	2	318771	319000	2	340554	341000	2	357722
P08238	Heat shock protein HSP 90-beta OS=Homo sapiens OX=9606 GN=HSP90AB1 PE=1 SV=4	sp|P08238|HS90B_HUMAN	18	3302518	5570000	18	3677318	5850000	18	5357750	8650000	18	3787295	6360000	18	2418001	4100000	18	4782642	7830000	18	3302436	5520000	18	4166282	6820000	18	4119132	6860000	18	4292119	7190000	18	4294544	7300000	18	4874506	8090000	18	3753776	6280000	18	2451689	4170000	18	3576705	5820000	18	5081416
P08240	Signal recognition particle receptor subunit alpha OS=Homo sapiens OX=9606 GN=SRPRA PE=1 SV=2	sp|P08240|SRPRA_HUMAN	2	4588	9180	2	691	#N/A	2	2034	#N/A	2	488	976	2	273	545	2	2275	4550	2	333	665	2	587	1170	2	1314	2630	2	3047	#N/A	2	474	#N/A	2	484	#N/A	2	817	#N/A	2	1273	2550	2	1124	2250	2	4217
P08473	Neprilysin OS=Homo sapiens OX=9606 GN=MME PE=1 SV=2	sp|P08473|NEP_HUMAN	10	71660	71700	10	48202	41000	10	85316	71700	10	171234	160000	10	170833	171000	10	220050	207000	10	171539	169000	10	217281	202000	10	177755	178000	10	235877	236000	10	139090	113000	10	165159	148000	10	297977	273000	10	39895	32400	10	150010	150000	10	186095
P08572	Collagen alpha-2(IV) chain OS=Homo sapiens OX=9606 GN=COL4A2 PE=1 SV=4	sp|P08572|CO4A2_HUMAN	1	2756	2760	1	2101	2100	1	1384	1380	1	865	865	1	2791	2790	1	5889	5890	1	2622	2620	1	6889	6890	1	3681	3680	1	11606	11600	1	5821	5820	1	7407	7410	1	8538	8540	1	2345	2340	1	2787	2790	1	3302
P08574	Cytochrome c1, heme protein, mitochondrial OS=Homo sapiens OX=9606 GN=CYC1 PE=1 SV=3	sp|P08574|CY1_HUMAN	7	241992	233000	7	103130	86500	7	210824	142000	7	138091	138000	7	79970	124000	7	140466	179000	7	96310	132000	7	200281	214000	7	114182	159000	7	122121	194000	7	199571	173000	7	141871	224000	7	197379	236000	7	145643	105000	7	129604	213000	7	168660
P08579	U2 small nuclear ribonucleoprotein B'' OS=Homo sapiens OX=9606 GN=SNRPB2 PE=1 SV=1	sp|P08579|RU2B_HUMAN	2	25046	6930	2	317481	317000	2	29869	4700	2	641093	641000	2	117584	118000	2	1434484	1430000	2	812047	812000	2	1221658	1220000	2	1063206	7860	2	617640	618000	2	1138015	1140000	2	1387618	1390000	2	39030	39000	2	1086673	1090000	2	995190	995000	2	910425
P08603	Complement factor H OS=Homo sapiens OX=9606 GN=CFH PE=1 SV=4	sp|P08603|CFAH_HUMAN	1	19257	19300	1	6985	#N/A	1	24999	25000	1	9951	9950	1	16208	16200	1	12651	12700	1	8325	8330	1	20269	20300	1	13462	13500	1	28201	28200	1	12343	12300	1	7466	7470	1	10923	10900	1	25183	25200	1	14272	14300	1	18208
P08648	Integrin alpha-5 OS=Homo sapiens OX=9606 GN=ITGA5 PE=1 SV=2	sp|P08648|ITA5_HUMAN	22	375599	545000	22	327910	449000	22	549654	825000	22	394497	538000	22	200102	235000	22	529229	770000	22	386051	538000	22	489811	640000	22	376274	411000	22	392765	545000	22	393153	554000	22	448128	646000	22	520177	723000	22	300949	458000	22	296547	454000	22	447806
P08670	Vimentin OS=Homo sapiens OX=9606 GN=VIM PE=1 SV=4	sp|P08670|VIME_HUMAN	39	76782537	145000000	39	35430248	65800000	39	115284004	213000000	39	103366888	193000000	39	79410287	149000000	39	83650372	155000000	39	93251150	175000000	39	116686846	216000000	39	97753565	182000000	39	116048075	216000000	39	93749692	176000000	39	88622217	164000000	39	83285513	153000000	39	71882233	132000000	39	82872116	154000000	39	112663498
P08708	40S ribosomal protein S17 OS=Homo sapiens OX=9606 GN=RPS17 PE=1 SV=2	sp|P08708|RS17_HUMAN	11	291760	722000	11	328549	809000	11	514021	1230000	11	543372	1430000	11	327901	878000	11	406340	983000	11	300497	744000	11	390537	935000	11	336195	817000	11	400353	950000	11	390223	944000	11	419294	1030000	11	362597	891000	11	337246	692000	11	321212	766000	11	468231
P08727	Keratin, type I cytoskeletal 19 OS=Homo sapiens OX=9606 GN=KRT19 PE=1 SV=4	sp|P08727|K1C19_HUMAN	7	91096	83600	7	350844	348000	7	75896	65700	7	60057	60100	7	37649	37600	7	71809	58100	7	22081	11200	7	67583	56900	7	39719	34200	7	106293	105000	7	50687	41000	7	151069	134000	7	41173	37700	7	66312	66300	7	20330	17000	7	82080
P08729	Keratin, type II cytoskeletal 7 OS=Homo sapiens OX=9606 GN=KRT7 PE=1 SV=5	sp|P08729|K2C7_HUMAN	14	195091	204000	14	1244875	1280000	14	658135	681000	14	176823	99800	14	220182	225000	14	302626	332000	14	290581	319000	14	173150	174000	14	356585	407000	14	313679	338000	14	127295	122000	14	828519	889000	14	510701	578000	14	539508	542000	14	125467	139000	14	521979
P08754	Guanine nucleotide-binding protein G(k) subunit alpha OS=Homo sapiens OX=9606 GN=GNAI3 PE=1 SV=3	sp|P08754|GNAI3_HUMAN	5	68110	68100	5	48229	48200	5	83548	54200	5	52241	52200	5	35348	27600	5	61577	38400	5	65916	29000	5	112545	113000	5	58503	45100	5	92366	50300	5	68912	68900	5	57478	45400	5	52208	52200	5	43559	33000	5	74367	74400	5	105262
P08758	Annexin A5 OS=Homo sapiens OX=9606 GN=ANXA5 PE=1 SV=2	sp|P08758|ANXA5_HUMAN	24	7704652	10500000	24	7185861	9810000	24	9592328	12800000	24	10866894	16300000	24	10325896	15700000	24	9931748	13800000	24	11791328	16800000	24	11907281	16300000	24	10655422	14800000	24	17738203	25000000	24	14570094	20700000	24	13078499	18100000	24	12996754	17900000	24	11046662	15600000	24	10933933	15100000	24	11781312
P08779	Keratin, type I cytoskeletal 16 OS=Homo sapiens OX=9606 GN=KRT16 PE=1 SV=4	sp|P08779|K1C16_HUMAN	8	75113	79400	8	44348	29400	8	5174805	3940000	8	51852	71600	8	29686	29900	8	50713	51900	8	37060	40300	8	56993	58100	8	48569	50500	8	42189	45500	8	59772	70900	8	49002	53000	8	36451	32400	8	29586	16700	8	44321	47300	8	55175
P08842	Steryl-sulfatase OS=Homo sapiens OX=9606 GN=STS PE=1 SV=2	sp|P08842|STS_HUMAN	1	13190	13200	1	3441	#N/A	1	15449	#N/A	1	7367	7370	1	4952	4950	1	15490	15500	1	10239	10200	1	6334	#N/A	1	7619	7620	1	8196	8200	1	7010	#N/A	1	16897	16900	1	5168	5170	1	3278	3280	1	5786	#N/A	1	2396
P08865	40S ribosomal protein SA OS=Homo sapiens OX=9606 GN=RPSA PE=1 SV=4	sp|P08865|RSSA_HUMAN	14	3501249	5970000	14	2740152	4460000	14	5439410	8840000	14	3253433	5420000	14	2165140	3580000	14	4032810	6600000	14	3022868	4990000	14	3703411	5960000	14	3238034	5310000	14	3572017	5940000	14	3239409	5410000	14	3908964	6570000	14	3177432	5150000	14	2891118	4670000	14	2968788	4860000	14	4513228
P09012	U1 small nuclear ribonucleoprotein A OS=Homo sapiens OX=9606 GN=SNRPA PE=1 SV=3	sp|P09012|SNRPA_HUMAN	3	66803	66800	3	46316	46300	3	85502	85500	3	54066	54100	3	19836	19800	3	72354	72400	3	42976	43000	3	58701	58700	3	66716	66700	3	56975	48800	3	47907	47900	3	70562	70600	3	64667	64700	3	51456	51500	3	62350	62400	3	72671
P09110	3-ketoacyl-CoA thiolase, peroxisomal OS=Homo sapiens OX=9606 GN=ACAA1 PE=1 SV=2	sp|P09110|THIK_HUMAN	5	169596	170000	5	860627	861000	5	931162	931000	5	1020046	1020000	5	763032	754000	5	1223641	1210000	5	1179031	1180000	5	1009591	1010000	5	400844	384000	5	1268545	1270000	5	1114631	1110000	5	108515	109000	5	1300799	1300000	5	1408081	1410000	5	1113094	1110000	5	1299293
P09132	Signal recognition particle 19 kDa protein OS=Homo sapiens OX=9606 GN=SRP19 PE=1 SV=3	sp|P09132|SRP19_HUMAN	1	29656	29700	1	22524	22500	1	27161	27200	1	22044	22000	1	14661	#N/A	1	25709	25700	1	17809	17800	1	32872	32900	1	15279	15300	1	15978	16000	1	11241	11200	1	18072	#N/A	1	10156	10200	1	19090	19100	1	15976	16000	1	34662
P09211	Glutathione S-transferase P OS=Homo sapiens OX=9606 GN=GSTP1 PE=1 SV=2	sp|P09211|GSTP1_HUMAN	14	4294273	8080000	14	2444900	4590000	14	3686899	6980000	14	2267897	4290000	14	2001997	3770000	14	3896702	7380000	14	2318116	4400000	14	3352692	6280000	14	2577142	4870000	14	3100786	5810000	14	3049790	5750000	14	3498842	6590000	14	3426238	6540000	14	3323777	6320000	14	2974814	5630000	14	3749348
P09234	U1 small nuclear ribonucleoprotein C OS=Homo sapiens OX=9606 GN=SNRPC PE=1 SV=1	sp|P09234|RU1C_HUMAN	1	10682	10700	1	3419	3420	1	16587	16600	1	8301	8300	1	6076	#N/A	1	14824	#N/A	1	7449	7450	1	14699	14700	1	11976	#N/A	1	9528	#N/A	1	15394	15400	1	13747	13700	1	19577	#N/A	1	10186	10200	1	7561	7560	1	13361
P09382	Galectin-1 OS=Homo sapiens OX=9606 GN=LGALS1 PE=1 SV=2	sp|P09382|LEG1_HUMAN	14	7729260	10900000	14	6735499	9460000	14	17089826	24100000	14	11304659	16000000	14	7730810	11000000	14	17555309	25100000	14	10498444	14900000	14	14724689	20800000	14	10657764	15100000	14	13734502	19900000	14	12488432	17700000	14	11758952	16700000	14	14573059	20900000	14	9959311	14400000	14	10876631	15500000	14	14527778
P09417	Dihydropteridine reductase OS=Homo sapiens OX=9606 GN=QDPR PE=1 SV=2	sp|P09417|DHPR_HUMAN	1	8481	8480	1	3371	3370	1	9798	9800	1	4004	4000	1	3261	3260	1	7032	7030	1	2821	2820	1	10473	10500	1	9619	9620	1	3540	3540	1	7330	7330	1	8115	8110	1	10309	10300	1	5046	5050	1	7481	7480	1	2782
P09429	High mobility group protein B1 OS=Homo sapiens OX=9606 GN=HMGB1 PE=1 SV=3	sp|P09429|HMGB1_HUMAN	2	110260	221000	2	528471	1060000	2	986378	1970000	2	559946	1120000	2	376789	754000	2	1196741	2390000	2	537958	1080000	2	892164	1780000	2	704795	1410000	2	703872	1410000	2	678815	1360000	2	939706	1880000	2	387932	776000	2	299571	599000	2	681129	1360000	2	1029241
P09486	SPARC OS=Homo sapiens OX=9606 GN=SPARC PE=1 SV=1	sp|P09486|SPRC_HUMAN	5	185887	186000	5	71140	71100	5	237394	237000	5	108630	109000	5	73992	74000	5	178955	179000	5	106108	106000	5	141754	142000	5	123871	124000	5	140979	141000	5	110016	110000	5	207978	208000	5	301595	302000	5	272101	272000	5	120518	121000	5	252171
P09493-10	Isoform 10 of Tropomyosin alpha-1 chain OS=Homo sapiens OX=9606 GN=TPM1	sp|P09493-10|TPM1_HUMAN	1	13030	13000	1	4475	4480	1	19926	19900	1	9788	9790	1	7935	7930	1	7677	7680	1	15101	15100	1	11325	11300	1	13623	13600	1	14957	15000	1	8834	8830	1	6468	6470	1	14237	14200	1	9438	9440	1	6322	6320	1	5479
P09525	Annexin A4 OS=Homo sapiens OX=9606 GN=ANXA4 PE=1 SV=4	sp|P09525|ANXA4_HUMAN	5	280356	558000	5	147183	291000	5	263071	504000	5	164481	315000	5	189763	265000	5	224753	432000	5	203071	384000	5	295440	581000	5	221907	425000	5	258183	503000	5	299760	583000	5	256073	399000	5	235144	443000	5	203669	404000	5	256624	495000	5	330978
P09601	Heme oxygenase 1 OS=Homo sapiens OX=9606 GN=HMOX1 PE=1 SV=1	sp|P09601|HMOX1_HUMAN	7	70176	28200	7	72952	71500	7	110805	87800	7	53891	57900	7	30994	19300	7	78860	83300	7	58417	56500	7	75377	76700	7	60812	63300	7	109116	88700	7	69992	67700	7	87760	72800	7	63093	67600	7	56776	47900	7	51302	38000	7	80559
P09619	Platelet-derived growth factor receptor beta OS=Homo sapiens OX=9606 GN=PDGFRB PE=1 SV=1	sp|P09619|PGFRB_HUMAN	20	813929	788000	20	607066	578000	20	1042294	996000	20	832886	913000	20	611061	612000	20	1092211	438000	20	707670	733000	20	1100967	1180000	20	906940	939000	20	1131545	274000	20	967658	1060000	20	1089386	162000	20	797892	784000	20	743123	871000	20	899615	884000	20	1187885
P09661	U2 small nuclear ribonucleoprotein A' OS=Homo sapiens OX=9606 GN=SNRPA1 PE=1 SV=2	sp|P09661|RU2A_HUMAN	3	15544	9190	3	20597	14800	3	32254	23800	3	23011	16700	3	7437	7440	3	32611	25700	3	19733	19700	3	26536	26500	3	16332	16300	3	19376	13100	3	17939	17900	3	21234	21200	3	14386	5280	3	22017	22000	3	22382	22400	3	34509
P09669	Cytochrome c oxidase subunit 6C OS=Homo sapiens OX=9606 GN=COX6C PE=1 SV=2	sp|P09669|COX6C_HUMAN	3	44741	38700	3	22369	22400	3	47852	47900	3	34874	34900	3	12248	11100	3	25883	25900	3	24097	22800	3	32467	31200	3	29295	26600	3	29870	29900	3	34129	30700	3	42793	39100	3	28258	27200	3	21786	21800	3	25949	23800	3	29152
P09874	Poly [ADP-ribose] polymerase 1 OS=Homo sapiens OX=9606 GN=PARP1 PE=1 SV=4	sp|P09874|PARP1_HUMAN	23	226907	259000	23	239148	217000	23	387826	446000	23	246022	226000	23	430418	446000	23	799204	779000	23	211482	179000	23	258187	280000	23	247533	340000	23	249216	238000	23	255987	316000	23	266816	293000	23	286368	309000	23	164042	176000	23	256233	274000	23	328913
P09936	Ubiquitin carboxyl-terminal hydrolase isozyme L1 OS=Homo sapiens OX=9606 GN=UCHL1 PE=1 SV=2	sp|P09936|UCHL1_HUMAN	17	1465104	1470000	17	770365	773000	17	636763	615000	17	272973	250000	17	251335	240000	17	314237	292000	17	427981	422000	17	1081883	1030000	17	397385	367000	17	592607	550000	17	523032	533000	17	1184815	1150000	17	816406	804000	17	1226242	1180000	17	378819	372000	17	648979
P09972	Fructose-bisphosphate aldolase C OS=Homo sapiens OX=9606 GN=ALDOC PE=1 SV=2	sp|P09972|ALDOC_HUMAN	9	321651	446000	9	185588	302000	9	366483	553000	9	556571	1050000	9	424739	813000	9	789221	1510000	9	209100	358000	9	788087	1430000	9	597350	1150000	9	272421	481000	9	229306	388000	9	603003	1130000	9	287325	505000	9	241539	428000	9	225483	348000	9	307823
P0DMV8	Heat shock 70 kDa protein 1A OS=Homo sapiens OX=9606 GN=HSPA1A PE=1 SV=1	sp|P0DMV8|HS71A_HUMAN	2	31533	63100	2	12851	#N/A	2	19638	#N/A	2	24679	49400	2	11934	#N/A	2	13850	#N/A	2	9775	#N/A	2	34471	68900	2	17968	#N/A	2	10204	20400	2	20047	40100	2	6213	12400	2	27339	54700	2	26985	54000	2	24274	48500	2	24300
P0DP23	Calmodulin-1 OS=Homo sapiens OX=9606 GN=CALM1 PE=1 SV=1	sp|P0DP23|CALM1_HUMAN	2	23187	46400	2	35458	70900	2	22802	45600	2	29424	58800	2	11835	23700	2	24722	49400	2	20666	41300	2	24818	49600	2	33451	66900	2	27270	54500	2	21523	43000	2	21312	42600	2	31033	62100	2	34291	68600	2	23176	46400	2	26738
P10109	Adrenodoxin, mitochondrial OS=Homo sapiens OX=9606 GN=FDX1 PE=1 SV=1	sp|P10109|ADX_HUMAN	1	3096	3100	1	15849	#N/A	1	3103	3100	1	2122	2120	1	488	488	1	3425	3420	1	14966	#N/A	1	36494	36500	1	1333	1330	1	1806	1810	1	1154	1150	1	5533	5530	1	6124	#N/A	1	12184	#N/A	1	21968	22000	1	39810
P10155	60 kDa SS-A/Ro ribonucleoprotein OS=Homo sapiens OX=9606 GN=TROVE2 PE=1 SV=2	sp|P10155|RO60_HUMAN	1	1933	1930	1	676	676	1	228	228	1	336	336	1	384	384	1	1423	1420	1	3259	3260	1	919	919	1	2763	2760	1	440	440	1	1614	1610	1	436	436	1	2001	2000	1	2615	2610	1	267	267	1	1514
P10176	Cytochrome c oxidase subunit 8A, mitochondrial OS=Homo sapiens OX=9606 GN=COX8A PE=1 SV=2	sp|P10176|COX8A_HUMAN	1	3671	3670	1	1102	1100	1	2570	2570	1	2029	2030	1	676	676	1	1046	1050	1	725	725	1	11606	11600	1	2295	2290	1	473	473	1	868	868	1	886	886	1	1507	1510	1	835	835	1	2710	2710	1	2054
P10253	Lysosomal alpha-glucosidase OS=Homo sapiens OX=9606 GN=GAA PE=1 SV=4	sp|P10253|LYAG_HUMAN	7	90433	38900	7	37543	31900	7	79530	75900	7	40161	26700	7	18736	17000	7	48712	41800	7	38663	34900	7	47149	41200	7	45680	40400	7	65257	65300	7	59883	59900	7	37117	16400	7	67988	68000	7	37991	35600	7	61197	61200	7	74159
P10301	Ras-related protein R-Ras OS=Homo sapiens OX=9606 GN=RRAS PE=1 SV=1	sp|P10301|RRAS_HUMAN	5	158777	166000	5	152763	66800	5	40341	48800	5	109134	112000	5	65512	45400	5	174396	188000	5	109904	53500	5	139412	142000	5	90382	96900	5	136698	75300	5	129586	146000	5	105500	60000	5	128143	134000	5	158865	175000	5	126065	139000	5	135476
P10398	Serine/threonine-protein kinase A-Raf OS=Homo sapiens OX=9606 GN=ARAF PE=1 SV=2	sp|P10398|ARAF_HUMAN	2	31309	23200	2	22845	9310	2	28178	28200	2	27080	27100	2	13122	#N/A	2	28899	#N/A	2	34568	15200	2	29017	29000	2	19874	#N/A	2	44329	28000	2	31620	31600	2	18169	#N/A	2	38658	38700	2	13170	13200	2	20018	20000	2	40754
P10515	Dihydrolipoyllysine-residue acetyltransferase component of pyruvate dehydrogenase complex, mitochondrial OS=Homo sapiens OX=9606 GN=DLAT PE=1 SV=3	sp|P10515|ODP2_HUMAN	10	330579	161000	10	149286	90800	10	220392	145000	10	119031	85300	10	100845	74700	10	185318	181000	10	201006	101000	10	200340	107000	10	190178	67300	10	174144	125000	10	166037	108000	10	130795	74200	10	192055	133000	10	125389	85300	10	270405	161000	10	231349
P10599	Thioredoxin OS=Homo sapiens OX=9606 GN=TXN PE=1 SV=3	sp|P10599|THIO_HUMAN	5	174585	342000	5	202454	395000	5	267759	525000	5	173803	336000	5	172264	331000	5	219167	429000	5	195961	387000	5	241066	475000	5	207706	410000	5	240175	467000	5	178914	350000	5	246662	487000	5	145756	284000	5	163239	319000	5	121157	229000	5	241988
P10606	Cytochrome c oxidase subunit 5B, mitochondrial OS=Homo sapiens OX=9606 GN=COX5B PE=1 SV=2	sp|P10606|COX5B_HUMAN	3	103500	104000	3	57647	57600	3	119683	120000	3	81385	81400	3	40165	40200	3	88428	88400	3	93523	93500	3	99159	99200	3	118288	118000	3	130262	130000	3	104358	104000	3	85707	85700	3	86825	86800	3	90136	90100	3	76365	76400	3	88191
P10620	Microsomal glutathione S-transferase 1 OS=Homo sapiens OX=9606 GN=MGST1 PE=1 SV=1	sp|P10620|MGST1_HUMAN	1	35391	35400	1	23336	23300	1	52870	52900	1	29643	29600	1	7441	7440	1	31068	#N/A	1	29724	#N/A	1	32026	32000	1	29332	#N/A	1	41685	#N/A	1	28175	28200	1	10985	11000	1	13385	13400	1	66317	66300	1	25983	26000	1	22683
P10644	cAMP-dependent protein kinase type I-alpha regulatory subunit OS=Homo sapiens OX=9606 GN=PRKAR1A PE=1 SV=1	sp|P10644|KAP0_HUMAN	2	40464	40500	2	10679	10700	2	71726	71700	2	62712	62700	2	36332	27500	2	49199	49200	2	17652	17700	2	51687	51700	2	40706	40700	2	61325	61300	2	41677	38000	2	41581	41600	2	25027	25000	2	52558	52600	2	41670	34000	2	56633
P10746	Uroporphyrinogen-III synthase OS=Homo sapiens OX=9606 GN=UROS PE=1 SV=1	sp|P10746|HEM4_HUMAN	1	4866	#N/A	1	2809	2810	1	1936	1940	1	1771	1770	1	1263	#N/A	1	1635	#N/A	1	3163	3160	1	7636	#N/A	1	2870	2870	1	1809	1810	1	1897	1900	1	2827	2830	1	2645	2640	1	1108	1110	1	2443	2440	1	2022
P10768	S-formylglutathione hydrolase OS=Homo sapiens OX=9606 GN=ESD PE=1 SV=2	sp|P10768|ESTD_HUMAN	13	452269	858000	13	301369	557000	13	535862	971000	13	432310	802000	13	311712	589000	13	472561	866000	13	335371	639000	13	431727	791000	13	315062	599000	13	404281	742000	13	413562	765000	13	373554	721000	13	380693	736000	13	343324	649000	13	369785	675000	13	430863
P10809	60 kDa heat shock protein, mitochondrial OS=Homo sapiens OX=9606 GN=HSPD1 PE=1 SV=2	sp|P10809|CH60_HUMAN	20	1610163	2260000	20	1696257	2420000	20	2535978	3560000	20	1887535	2670000	20	955180	1360000	20	2088701	2950000	20	1374269	1930000	20	1726333	2420000	20	1637363	2330000	20	1529662	2150000	20	1783274	2570000	20	2218231	3100000	20	1845768	2620000	20	1847578	2730000	20	1508820	2110000	20	2153272
P10915	Hyaluronan and proteoglycan link protein 1 OS=Homo sapiens OX=9606 GN=HAPLN1 PE=2 SV=2	sp|P10915|HPLN1_HUMAN	2	35450	35500	2	15565	15600	2	45513	45500	2	16196	16200	2	14672	14700	2	37321	37300	2	17255	17300	2	24216	24200	2	32970	33000	2	19048	10900	2	42759	42800	2	38309	38300	2	35558	35600	2	30247	30200	2	20932	20900	2	48501
P11021	Endoplasmic reticulum chaperone BiP OS=Homo sapiens OX=9606 GN=HSPA5 PE=1 SV=2	sp|P11021|BIP_HUMAN	34	9319368	17400000	34	6854071	12800000	34	11228176	20700000	34	7378177	13600000	34	4892242	9130000	34	10165973	18800000	34	6923877	12800000	34	8411174	15400000	34	7257987	13400000	34	9463234	17600000	34	9454900	17500000	34	9853532	18300000	34	12237663	22700000	34	11148411	20600000	34	6795197	12600000	34	9822535
P11047	Laminin subunit gamma-1 OS=Homo sapiens OX=9606 GN=LAMC1 PE=1 SV=3	sp|P11047|LAMC1_HUMAN	13	242967	243000	13	127742	128000	13	251730	166000	13	159129	126000	13	71810	58800	13	147222	112000	13	75028	74400	13	123786	85200	13	87970	77700	13	102360	78600	13	113089	108000	13	127725	113000	13	169671	155000	13	186214	151000	13	98574	95000	13	157160
P11117	Lysosomal acid phosphatase OS=Homo sapiens OX=9606 GN=ACP2 PE=1 SV=3	sp|P11117|PPAL_HUMAN	4	32769	10200	4	17152	17200	4	29092	21400	4	29498	29500	4	23402	23400	4	21773	21800	4	24192	7640	4	23865	23900	4	18754	997	4	33682	17600	4	19933	17300	4	17304	4930	4	21864	21900	4	22739	13000	4	23396	22600	4	23443
P11142	Heat shock cognate 71 kDa protein OS=Homo sapiens OX=9606 GN=HSPA8 PE=1 SV=1	sp|P11142|HSP7C_HUMAN	2	123471	123000	2	92238	5460	2	278277	273000	2	144273	5190	2	9274	2100	2	149046	#N/A	2	87071	#N/A	2	155341	155000	2	73475	7100	2	102967	11000	2	158978	159000	2	26690	9780	2	216055	216000	2	167928	161000	2	121711	9860	2	215352
P11166	Solute carrier family 2, facilitated glucose transporter member 1 OS=Homo sapiens OX=9606 GN=SLC2A1 PE=1 SV=2	sp|P11166|GTR1_HUMAN	2	24328	1610	2	8328	8330	2	8563	3060	2	8886	8890	2	8672	8670	2	11743	3110	2	146909	147000	2	14433	14400	2	6788	2400	2	163925	164000	2	6893	6890	2	15074	15100	2	15534	15500	2	182846	181000	2	10621	10600	2	11219
P11172	Uridine 5'-monophosphate synthase OS=Homo sapiens OX=9606 GN=UMPS PE=1 SV=1	sp|P11172|UMPS_HUMAN	2	35275	35300	2	22936	1590	2	73791	3990	2	18263	2120	2	5447	5450	2	64923	52400	2	6989	6990	2	92841	43300	2	14322	14300	2	13887	4440	2	35081	3080	2	6255	6250	2	63275	#N/A	2	49293	3490	2	36347	3180	2	47322
P11182	Lipoamide acyltransferase component of branched-chain alpha-keto acid dehydrogenase complex, mitochondrial OS=Homo sapiens OX=9606 GN=DBT PE=1 SV=3	sp|P11182|ODB2_HUMAN	4	34083	34100	4	15073	12100	4	28870	28900	4	29075	29100	4	20752	15400	4	21006	15000	4	27475	27500	4	26918	21100	4	25584	10600	4	21993	20100	4	44325	44300	4	24244	6710	4	25640	25600	4	30355	30400	4	26529	26500	4	24590
P11216	Glycogen phosphorylase, brain form OS=Homo sapiens OX=9606 GN=PYGB PE=1 SV=5	sp|P11216|PYGB_HUMAN	28	548568	507000	28	376519	385000	28	747478	743000	28	438786	479000	28	185229	210000	28	429940	515000	28	278649	349000	28	480551	483000	28	374658	384000	28	353283	445000	28	437799	524000	28	363693	376000	28	465087	412000	28	502419	494000	28	434725	498000	28	423073
P11233	Ras-related protein Ral-A OS=Homo sapiens OX=9606 GN=RALA PE=1 SV=1	sp|P11233|RALA_HUMAN	1	48900	48900	1	25038	25000	1	65760	65800	1	41006	41000	1	33720	33700	1	53595	53600	1	34920	34900	1	53223	53200	1	44246	44200	1	46296	46300	1	37532	37500	1	53293	53300	1	39372	39400	1	41363	41400	1	38870	38900	1	60415
P11279	Lysosome-associated membrane glycoprotein 1 OS=Homo sapiens OX=9606 GN=LAMP1 PE=1 SV=3	sp|P11279|LAMP1_HUMAN	1	62869	62900	1	39955	40000	1	139133	139000	1	98131	98100	1	81238	81200	1	98258	98300	1	103818	104000	1	114251	114000	1	87436	87400	1	109680	110000	1	86644	86600	1	131964	132000	1	132993	133000	1	100851	101000	1	95453	95500	1	103925
P11387	DNA topoisomerase 1 OS=Homo sapiens OX=9606 GN=TOP1 PE=1 SV=2	sp|P11387|TOP1_HUMAN	7	83850	83900	7	45858	45900	7	108546	37500	7	42660	42700	7	32078	32100	7	81998	50300	7	40907	26900	7	54303	54300	7	46181	42700	7	54069	38800	7	60072	49100	7	68526	58600	7	58372	58400	7	42605	24500	7	53515	53500	7	76103
P11441	Ubiquitin-like protein 4A OS=Homo sapiens OX=9606 GN=UBL4A PE=1 SV=1	sp|P11441|UBL4A_HUMAN	6	70362	104000	6	97957	164000	6	77549	111000	6	50217	63400	6	34105	38700	6	107914	140000	6	50781	54600	6	87547	116000	6	92107	133000	6	64652	76600	6	66228	99800	6	71203	86100	6	54120	78400	6	55393	70000	6	83068	122000	6	110804
P11498	Pyruvate carboxylase, mitochondrial OS=Homo sapiens OX=9606 GN=PC PE=1 SV=2	sp|P11498|PYC_HUMAN	6	126449	73600	6	52894	44800	6	176319	102000	6	77849	68200	6	36779	34500	6	87711	82900	6	55203	52600	6	79229	77500	6	62719	62700	6	51554	42600	6	104795	76900	6	71868	61500	6	92589	68400	6	43467	43500	6	74892	61800	6	76743
P11586	C-1-tetrahydrofolate synthase, cytoplasmic OS=Homo sapiens OX=9606 GN=MTHFD1 PE=1 SV=3	sp|P11586|C1TC_HUMAN	29	960753	1580000	29	923893	1370000	29	1527115	2400000	29	864151	1290000	29	640414	992000	29	1176279	571000	29	802596	1240000	29	1168962	1800000	29	980012	470000	29	1099263	490000	29	1070136	1620000	29	1090861	1780000	29	1104080	1860000	29	854311	1400000	29	910761	1360000	29	1246989
P11717	Cation-independent mannose-6-phosphate receptor OS=Homo sapiens OX=9606 GN=IGF2R PE=1 SV=3	sp|P11717|MPRI_HUMAN	29	386827	292000	29	249936	228000	29	369821	328000	29	364585	347000	29	254141	243000	29	385217	355000	29	306474	290000	29	264504	170000	29	240861	218000	29	295390	275000	29	230919	186000	29	258076	241000	29	311266	282000	29	366511	333000	29	269383	217000	29	341580
P11766	Alcohol dehydrogenase class-3 OS=Homo sapiens OX=9606 GN=ADH5 PE=1 SV=4	sp|P11766|ADHX_HUMAN	10	290522	337000	10	203576	259000	10	288919	289000	10	182690	227000	10	155109	118000	10	295289	271000	10	272781	322000	10	299420	323000	10	216101	207000	10	344530	307000	10	299424	344000	10	283443	293000	10	340026	372000	10	255349	316000	10	240678	289000	10	255798
P11802	Cyclin-dependent kinase 4 OS=Homo sapiens OX=9606 GN=CDK4 PE=1 SV=2	sp|P11802|CDK4_HUMAN	1	10047	10000	1	4392	4390	1	7389	7390	1	3559	3560	1	1827	#N/A	1	3704	3700	1	5856	5860	1	1544	#N/A	1	12538	12500	1	6487	6490	1	4808	4810	1	4036	4040	1	3886	#N/A	1	4688	#N/A	1	3449	3450	1	4627
P12004	Proliferating cell nuclear antigen OS=Homo sapiens OX=9606 GN=PCNA PE=1 SV=1	sp|P12004|PCNA_HUMAN	14	472917	792000	14	657221	595000	14	1244561	1030000	14	894285	862000	14	394911	465000	14	865301	806000	14	486485	495000	14	659723	1130000	14	580649	611000	14	507682	588000	14	550128	945000	14	686958	735000	14	646521	1060000	14	296761	489000	14	589538	995000	14	1202296
P12109	Collagen alpha-1(VI) chain OS=Homo sapiens OX=9606 GN=COL6A1 PE=1 SV=3	sp|P12109|CO6A1_HUMAN	26	1219735	1800000	26	761518	1080000	26	877716	1280000	26	1039500	1540000	26	940641	1450000	26	2895809	4410000	26	824397	1230000	26	2635845	4090000	26	1280253	1920000	26	1398073	2160000	26	1532452	2400000	26	1427158	2150000	26	1959713	3010000	26	1262209	1960000	26	1128667	1690000	26	1836015
P12110	Collagen alpha-2(VI) chain OS=Homo sapiens OX=9606 GN=COL6A2 PE=1 SV=4	sp|P12110|CO6A2_HUMAN	3	19686	24300	3	8946	10100	3	28876	39400	3	31333	39200	3	25353	30200	3	71085	89200	3	34137	44300	3	53189	64400	3	26893	35000	3	36787	54700	3	29496	31200	3	6679	7550	3	55085	62600	3	31560	33500	3	7241	8920	3	53366
P12110-2	Isoform 2C2A of Collagen alpha-2(VI) chain OS=Homo sapiens OX=9606 GN=COL6A2	sp|P12110-2|CO6A2_HUMAN	3	13639	13600	3	30874	30900	3	35614	35600	3	11260	11300	3	16399	16400	3	57370	57400	3	53323	53300	3	73290	73300	3	9312	9310	3	22641	22600	3	24704	24700	3	49822	49800	3	24762	24800	3	16397	16400	3	49759	49800	3	55321
P12111	Collagen alpha-3(VI) chain OS=Homo sapiens OX=9606 GN=COL6A3 PE=1 SV=5	sp|P12111|CO6A3_HUMAN	2	33170	33200	2	18046	18000	2	28957	29000	2	11016	11000	2	8164	8160	2	12407	12400	2	17530	17500	2	77762	67700	2	70530	70500	2	16193	16200	2	19830	19800	2	15444	15400	2	22502	19500	2	20864	16600	2	13280	13300	2	20920
P12235	ADP/ATP translocase 1 OS=Homo sapiens OX=9606 GN=SLC25A4 PE=1 SV=4	sp|P12235|ADT1_HUMAN	1	12957	13000	1	12201	12200	1	32599	32600	1	27072	27100	1	7830	7830	1	40922	40900	1	4025	#N/A	1	7805	7810	1	3831	3830	1	10563	#N/A	1	14827	14800	1	22864	22900	1	8510	8510	1	8021	8020	1	10623	10600	1	20043
P12236	ADP/ATP translocase 3 OS=Homo sapiens OX=9606 GN=SLC25A6 PE=1 SV=4	sp|P12236|ADT3_HUMAN	2	243902	244000	2	248244	248000	2	682813	683000	2	342778	343000	2	192966	193000	2	394478	394000	2	316993	317000	2	353074	353000	2	317590	318000	2	309478	309000	2	309477	309000	2	345562	346000	2	377651	378000	2	393619	394000	2	279535	280000	2	392456
P12268	Inosine-5'-monophosphate dehydrogenase 2 OS=Homo sapiens OX=9606 GN=IMPDH2 PE=1 SV=2	sp|P12268|IMDH2_HUMAN	13	446229	522000	13	318161	393000	13	540611	651000	13	393968	453000	13	210618	231000	13	514929	593000	13	232224	272000	13	438696	512000	13	409466	514000	13	322107	405000	13	352453	430000	13	465237	589000	13	301519	379000	13	169905	196000	13	337700	429000	13	491932
P12270	Nucleoprotein TPR OS=Homo sapiens OX=9606 GN=TPR PE=1 SV=3	sp|P12270|TPR_HUMAN	13	135756	197000	13	105464	151000	13	178329	265000	13	121751	192000	13	72017	101000	13	130221	65000	13	114547	84800	13	134797	181000	13	120094	67500	13	163555	132000	13	131052	191000	13	134401	94200	13	114698	164000	13	99623	141000	13	89716	116000	13	127241
P12277	Creatine kinase B-type OS=Homo sapiens OX=9606 GN=CKB PE=1 SV=1	sp|P12277|KCRB_HUMAN	12	488363	616000	12	197198	256000	12	695129	938000	12	639898	894000	12	468267	664000	12	1154119	1560000	12	301601	425000	12	293408	371000	12	320260	387000	12	239302	325000	12	140506	164000	12	241932	318000	12	315214	436000	12	345831	462000	12	445917	597000	12	872490
P12429	Annexin A3 OS=Homo sapiens OX=9606 GN=ANXA3 PE=1 SV=3	sp|P12429|ANXA3_HUMAN	2	108557	109000	2	63777	63800	2	173695	174000	2	107611	108000	2	68956	69000	2	121052	121000	2	97029	97000	2	118589	119000	2	105561	106000	2	106764	107000	2	107719	108000	2	119335	119000	2	130465	130000	2	112160	112000	2	93516	93500	2	106418
P12755	Ski oncogene OS=Homo sapiens OX=9606 GN=SKI PE=1 SV=1	sp|P12755|SKI_HUMAN	1	6240	6240	1	8057	8060	1	4139	4140	1	39053	39100	1	4435	4440	1	11024	11000	1	4432	4430	1	8353	8350	1	45654	45700	1	10047	10000	1	13781	13800	1	9136	9140	1	2754	2750	1	5207	5210	1	5043	5040	1	15023
P12956	X-ray repair cross-complementing protein 6 OS=Homo sapiens OX=9606 GN=XRCC6 PE=1 SV=2	sp|P12956|XRCC6_HUMAN	3	40487	76600	3	51734	98500	3	105096	207000	3	79398	155000	3	48033	93100	3	117965	230000	3	65949	124000	3	91190	174000	3	80574	156000	3	100941	175000	3	74255	144000	3	87731	168000	3	73451	144000	3	62129	121000	3	74242	144000	3	86319
P13010	X-ray repair cross-complementing protein 5 OS=Homo sapiens OX=9606 GN=XRCC5 PE=1 SV=3	sp|P13010|XRCC5_HUMAN	32	1084286	1430000	32	1138088	1590000	32	1817282	2460000	32	1366778	1870000	32	807701	1200000	32	1620117	2090000	32	1158987	1590000	32	1356091	1780000	32	998891	1330000	32	1259324	1650000	32	1166537	1620000	32	1227680	1710000	32	1330697	1780000	32	920239	1220000	32	1081692	1420000	32	1698745
P13073	Cytochrome c oxidase subunit 4 isoform 1, mitochondrial OS=Homo sapiens OX=9606 GN=COX4I1 PE=1 SV=1	sp|P13073|COX41_HUMAN	4	53904	76200	4	43630	54400	4	110985	131000	4	65334	77900	4	30169	36400	4	70881	82100	4	55241	67400	4	63813	79200	4	56858	70600	4	55768	73900	4	61625	77000	4	76826	93300	4	68691	88700	4	53354	66600	4	57293	69100	4	67001
P13473-2	Isoform LAMP-2B of Lysosome-associated membrane glycoprotein 2 OS=Homo sapiens OX=9606 GN=LAMP2	sp|P13473-2|LAMP2_HUMAN	1	10188	10200	1	10723	10700	1	13777	13800	1	5122	5120	1	7302	#N/A	1	15555	15600	1	10829	#N/A	1	6424	6420	1	11569	11600	1	6663	6660	1	11032	11000	1	7485	7480	1	14120	14100	1	12183	12200	1	2248	2250	1	12035
P13489	Ribonuclease inhibitor OS=Homo sapiens OX=9606 GN=RNH1 PE=1 SV=2	sp|P13489|RINI_HUMAN	33	5527100	9390000	33	4428808	4770000	33	6071737	10300000	33	3732945	7210000	33	4382780	8440000	33	5570912	8910000	33	4678122	8940000	33	7483078	11300000	33	5268794	10200000	33	6356952	12100000	33	6430757	12400000	33	5302894	10300000	33	4629884	8880000	33	4619976	8880000	33	6005498	11500000	33	6450243
P13612	Integrin alpha-4 OS=Homo sapiens OX=9606 GN=ITGA4 PE=1 SV=3	sp|P13612|ITA4_HUMAN	5	69636	69600	5	32630	32600	5	47339	40900	5	52086	52100	5	25380	21400	5	56595	49100	5	38942	36800	5	58032	53800	5	47496	35600	5	46092	42600	5	28904	28900	5	54588	11700	5	62527	62500	5	46623	46600	5	20462	17100	5	64229
P13639	Elongation factor 2 OS=Homo sapiens OX=9606 GN=EEF2 PE=1 SV=4	sp|P13639|EF2_HUMAN	69	9640648	15400000	69	7526457	11700000	69	15149556	23700000	69	11692402	19000000	69	7175907	11700000	69	11074981	17300000	69	8876029	14300000	69	11213466	17800000	69	9869073	15600000	69	10824416	17400000	69	10357362	16600000	69	10429599	16200000	69	9355561	14700000	69	8700452	13900000	69	8195524	12800000	69	13427951
P13645	Keratin, type I cytoskeletal 10 OS=Homo sapiens OX=9606 GN=KRT10 PE=1 SV=6	sp|P13645|K1C10_HUMAN	12	332335	543000	12	102579	115000	12	7319347	12800000	12	131239	177000	12	108407	159000	12	467352	527000	12	109046	138000	12	159867	219000	12	90459	114000	12	256921	436000	12	152079	235000	12	180791	262000	12	104583	137000	12	146034	227000	12	104687	151000	12	197738
P13647	Keratin, type II cytoskeletal 5 OS=Homo sapiens OX=9606 GN=KRT5 PE=1 SV=3	sp|P13647|K2C5_HUMAN	8	66301	88100	8	38734	61200	8	3700477	5350000	8	57513	89400	8	26559	40100	8	57738	83100	8	27773	35900	8	48593	71400	8	41548	59700	8	62794	108000	8	46095	69200	8	30447	41100	8	59539	101000	8	58133	79100	8	33547	48000	8	60922
P13667	Protein disulfide-isomerase A4 OS=Homo sapiens OX=9606 GN=PDIA4 PE=1 SV=2	sp|P13667|PDIA4_HUMAN	21	1282600	1280000	21	1127406	1120000	21	1628160	1620000	21	1431962	1430000	21	542806	507000	21	1356883	1290000	21	786548	731000	21	1207039	1210000	21	990969	940000	21	1102001	1040000	21	1051128	1050000	21	1161490	1110000	21	1163453	1160000	21	1579231	1570000	21	902955	899000	21	1172170
P13674	Prolyl 4-hydroxylase subunit alpha-1 OS=Homo sapiens OX=9606 GN=P4HA1 PE=1 SV=2	sp|P13674|P4HA1_HUMAN	2	234294	469000	2	12676	25400	2	140117	280000	2	12767	25500	2	8426	16900	2	20451	40900	2	10158	20300	2	88671	#N/A	2	7274	14500	2	13133	26300	2	62356	#N/A	2	11423	22800	2	58886	#N/A	2	111618	#N/A	2	65087	#N/A	2	14220
P13693	Translationally-controlled tumor protein OS=Homo sapiens OX=9606 GN=TPT1 PE=1 SV=1	sp|P13693|TCTP_HUMAN	4	479519	695000	4	388107	598000	4	813146	1290000	4	499684	777000	4	331163	523000	4	565999	923000	4	402888	629000	4	485337	755000	4	456769	723000	4	477457	751000	4	407347	635000	4	455696	714000	4	410618	654000	4	402327	639000	4	377998	589000	4	584627
P13797	Plastin-3 OS=Homo sapiens OX=9606 GN=PLS3 PE=1 SV=4	sp|P13797|PLST_HUMAN	2	13915	27800	2	27677	55400	2	53330	107000	2	38504	77000	2	24599	49200	2	54638	109000	2	31423	62800	2	47091	94200	2	29116	58200	2	42826	85700	2	39824	79600	2	35653	71300	2	54707	109000	2	34555	69100	2	43889	87800	2	43559
P13798	Acylamino-acid-releasing enzyme OS=Homo sapiens OX=9606 GN=APEH PE=1 SV=4	sp|P13798|ACPH_HUMAN	11	218680	189000	11	145314	145000	11	220350	210000	11	178680	176000	11	122650	114000	11	259799	219000	11	178006	158000	11	231362	217000	11	180051	155000	11	148987	122000	11	196280	179000	11	231875	222000	11	129271	121000	11	183174	180000	11	180549	167000	11	227367
P13804	Electron transfer flavoprotein subunit alpha, mitochondrial OS=Homo sapiens OX=9606 GN=ETFA PE=1 SV=1	sp|P13804|ETFA_HUMAN	1	19921	#N/A	1	24436	24400	1	37723	37700	1	3014	3010	1	1633	1630	1	40941	40900	1	6557	6560	1	32335	32300	1	8588	8590	1	29324	29300	1	13676	#N/A	1	12224	#N/A	1	9933	#N/A	1	7152	7150	1	8579	8580	1	3977
P13984	General transcription factor IIF subunit 2 OS=Homo sapiens OX=9606 GN=GTF2F2 PE=1 SV=2	sp|P13984|T2FB_HUMAN	4	16596	11100	4	15949	15900	4	13743	10800	4	17125	12100	4	15543	9670	4	26426	13600	4	8976	7790	4	18690	18700	4	10249	8140	4	30076	29600	4	17207	17200	4	17151	17200	4	12543	8560	4	14866	8590	4	19026	11700	4	21581
P13987	CD59 glycoprotein OS=Homo sapiens OX=9606 GN=CD59 PE=1 SV=1	sp|P13987|CD59_HUMAN	4	261052	364000	4	127995	181000	4	225333	315000	4	170304	242000	4	161379	235000	4	243799	345000	4	219420	313000	4	282123	404000	4	204763	295000	4	354628	494000	4	252586	344000	4	196043	296000	4	191653	264000	4	203766	275000	4	221760	324000	4	193495
P14174	Macrophage migration inhibitory factor OS=Homo sapiens OX=9606 GN=MIF PE=1 SV=4	sp|P14174|MIF_HUMAN	8	4837038	7410000	8	2522605	3770000	8	3891140	5790000	8	2491270	3710000	8	2704804	3980000	8	5162613	7720000	8	3001566	4470000	8	4726230	7130000	8	3760749	5550000	8	5164707	7640000	8	4437645	6530000	8	4964647	7370000	8	4165720	6360000	8	3929714	5900000	8	3606737	5330000	8	4403099
P14406	Cytochrome c oxidase subunit 7A2, mitochondrial OS=Homo sapiens OX=9606 GN=COX7A2 PE=1 SV=1	sp|P14406|CX7A2_HUMAN	2	118233	118000	2	131133	131000	2	247953	248000	2	161283	161000	2	100181	100000	2	216736	217000	2	147320	147000	2	186015	186000	2	147097	147000	2	162313	162000	2	189763	190000	2	231348	231000	2	224724	225000	2	153098	153000	2	171311	171000	2	200049
P14550	Alcohol dehydrogenase [NADP(+)] OS=Homo sapiens OX=9606 GN=AKR1A1 PE=1 SV=3	sp|P14550|AK1A1_HUMAN	12	653111	690000	12	415737	369000	12	662887	575000	12	399150	396000	12	287237	300000	12	554499	568000	12	430110	452000	12	577718	474000	12	425054	453000	12	411852	442000	12	531527	426000	12	430690	453000	12	433202	359000	12	606704	525000	12	490916	424000	12	623054
P14618-2	Isoform M1 of Pyruvate kinase PKM OS=Homo sapiens OX=9606 GN=PKM	sp|P14618-2|KPYM_HUMAN	5	467715	603000	5	193849	227000	5	377749	481000	5	269496	297000	5	127523	222000	5	232500	330000	5	150770	190000	5	276528	258000	5	150770	210000	5	178671	231000	5	264835	233000	5	192869	268000	5	245942	333000	5	314599	415000	5	263359	253000	5	229832
P14621	Acylphosphatase-2 OS=Homo sapiens OX=9606 GN=ACYP2 PE=1 SV=2	sp|P14621|ACYP2_HUMAN	1	14260	#N/A	1	5181	#N/A	1	9976	#N/A	1	9161	9160	1	5757	5760	1	10774	10800	1	10628	10600	1	12963	13000	1	6403	6400	1	5117	5120	1	13995	14000	1	16130	16100	1	4984	#N/A	1	18466	18500	1	14124	14100	1	13869
P14625	Endoplasmin OS=Homo sapiens OX=9606 GN=HSP90B1 PE=1 SV=1	sp|P14625|ENPL_HUMAN	37	10806638	16500000	37	6464941	10000000	37	9539025	14400000	37	6975417	10700000	37	4838329	7110000	37	10986847	16500000	37	7160835	10900000	37	10310930	15600000	37	6398072	9530000	37	8484833	12800000	37	7382176	10400000	37	9278917	14300000	37	8589107	12700000	37	7508144	11300000	37	7366757	11100000	37	8555137
P14649	Myosin light chain 6B OS=Homo sapiens OX=9606 GN=MYL6B PE=1 SV=1	sp|P14649|MYL6B_HUMAN	1	124458	124000	1	133581	134000	1	350054	350000	1	229381	229000	1	179306	179000	1	279937	280000	1	234998	235000	1	243533	244000	1	179526	180000	1	242545	243000	1	177800	178000	1	220491	220000	1	402297	402000	1	363188	363000	1	224259	224000	1	356397
P14735	Insulin-degrading enzyme OS=Homo sapiens OX=9606 GN=IDE PE=1 SV=4	sp|P14735|IDE_HUMAN	6	112411	147000	6	85420	113000	6	183443	199000	6	96678	127000	6	50717	61200	6	137456	203000	6	45183	67200	6	180084	206000	6	53011	58400	6	139117	217000	6	84953	33200	6	149397	222000	6	79916	89700	6	98517	122000	6	92717	138000	6	129164
P14854	Cytochrome c oxidase subunit 6B1 OS=Homo sapiens OX=9606 GN=COX6B1 PE=1 SV=2	sp|P14854|CX6B1_HUMAN	2	175863	176000	2	114750	115000	2	185376	185000	2	136124	136000	2	78140	78100	2	158292	158000	2	108829	109000	2	151637	152000	2	126088	126000	2	131502	132000	2	174079	174000	2	163708	164000	2	131368	131000	2	151639	152000	2	152762	153000	2	172999
P14868	Aspartate--tRNA ligase, cytoplasmic OS=Homo sapiens OX=9606 GN=DARS PE=1 SV=2	sp|P14868|SYDC_HUMAN	5	44118	4530	5	27286	28200	5	47661	14800	5	24691	19900	5	14152	12800	5	35264	32700	5	20375	13200	5	43325	39300	5	26394	16700	5	32898	1060	5	25440	28700	5	21560	29200	5	52650	50500	5	16715	13800	5	28538	25500	5	53892
P14923	Junction plakoglobin OS=Homo sapiens OX=9606 GN=JUP PE=1 SV=3	sp|P14923|PLAK_HUMAN	5	26603	26600	5	17645	17600	5	243740	244000	5	22404	20700	5	11282	9950	5	35018	35000	5	15365	15400	5	13921	12900	5	14538	9410	5	18512	12200	5	11165	10100	5	17553	17600	5	14383	14400	5	15219	15200	5	14094	14100	5	27727
P15104	Glutamine synthetase OS=Homo sapiens OX=9606 GN=GLUL PE=1 SV=4	sp|P15104|GLNA_HUMAN	7	93612	71100	7	61062	45700	7	114524	115000	7	81906	65000	7	48138	42700	7	96283	86500	7	67554	44300	7	82298	79500	7	68827	57500	7	98352	76600	7	68230	68200	7	84615	77600	7	95988	96000	7	54911	52800	7	76065	76100	7	77856
P15121	Aldose reductase OS=Homo sapiens OX=9606 GN=AKR1B1 PE=1 SV=3	sp|P15121|ALDR_HUMAN	16	634930	784000	16	515886	622000	16	735783	858000	16	540236	645000	16	342007	468000	16	643457	802000	16	480781	579000	16	624159	732000	16	506123	630000	16	417714	541000	16	577044	685000	16	476884	596000	16	447318	543000	16	677903	823000	16	532361	622000	16	730134
P15144	Aminopeptidase N OS=Homo sapiens OX=9606 GN=ANPEP PE=1 SV=4	sp|P15144|AMPN_HUMAN	35	995602	1230000	35	566887	748000	35	1754202	2320000	35	1320477	1770000	35	1353724	1780000	35	2039628	2700000	35	2208934	2930000	35	3383374	4520000	35	2014096	2610000	35	3497138	4600000	35	2312453	3120000	35	1215232	1590000	35	835778	1060000	35	1378631	1770000	35	1851826	2490000	35	2461697
P15153	Ras-related C3 botulinum toxin substrate 2 OS=Homo sapiens OX=9606 GN=RAC2 PE=1 SV=1	sp|P15153|RAC2_HUMAN	4	22904	2920	4	8150	14000	4	23097	29300	4	17402	18100	4	4039	6360	4	48481	93500	4	13304	17900	4	19118	21400	4	20435	32400	4	4120	6910	4	21610	27800	4	7038	10800	4	21273	33700	4	24451	25700	4	12344	20400	4	18461
P15311	Ezrin OS=Homo sapiens OX=9606 GN=EZR PE=1 SV=4	sp|P15311|EZRI_HUMAN	20	725240	864000	20	744005	895000	20	1264891	1420000	20	787301	933000	20	477798	547000	20	737617	861000	20	451502	579000	20	614512	757000	20	599335	737000	20	487130	610000	20	473337	570000	20	349797	421000	20	371477	470000	20	772776	925000	20	541826	677000	20	1437144
P15374	Ubiquitin carboxyl-terminal hydrolase isozyme L3 OS=Homo sapiens OX=9606 GN=UCHL3 PE=1 SV=1	sp|P15374|UCHL3_HUMAN	5	122681	168000	5	75917	113000	5	138685	182000	5	116362	161000	5	65514	73900	5	112613	160000	5	87789	126000	5	129517	177000	5	109064	153000	5	116248	163000	5	124985	175000	5	132898	147000	5	116564	164000	5	122182	171000	5	88151	126000	5	110163
P15848	Arylsulfatase B OS=Homo sapiens OX=9606 GN=ARSB PE=1 SV=1	sp|P15848|ARSB_HUMAN	1	70534	70500	1	48030	48000	1	34701	34700	1	26336	26300	1	22337	22300	1	30396	30400	1	29488	29500	1	26797	26800	1	32115	32100	1	33874	33900	1	27895	27900	1	48893	48900	1	36566	36600	1	38660	38700	1	43557	43600	1	38575
P15880	40S ribosomal protein S2 OS=Homo sapiens OX=9606 GN=RPS2 PE=1 SV=2	sp|P15880|RS2_HUMAN	12	1202306	1530000	12	1148558	1440000	12	2085483	2540000	12	1363026	1190000	12	774628	815000	12	1773876	1850000	12	1138982	1040000	12	1483698	1880000	12	1422829	1370000	12	1387102	1250000	12	1283093	1630000	12	1510869	1450000	12	1343096	1750000	12	1152920	1460000	12	1229600	1570000	12	2124631
P15924	Desmoplakin OS=Homo sapiens OX=9606 GN=DSP PE=1 SV=3	sp|P15924|DESP_HUMAN	7	56022	72800	7	74215	101000	7	245749	289000	7	53672	61100	7	29268	49700	7	71893	85800	7	69032	50100	7	54258	62200	7	38288	53000	7	79837	60600	7	81415	97900	7	61994	39900	7	58385	65500	7	127707	149000	7	30487	43600	7	129795
P15954	Cytochrome c oxidase subunit 7C, mitochondrial OS=Homo sapiens OX=9606 GN=COX7C PE=1 SV=1	sp|P15954|COX7C_HUMAN	2	24498	24500	2	13377	13400	2	30405	9510	2	20461	20500	2	13981	6480	2	14168	14200	2	21680	9980	2	18241	9720	2	8918	8920	2	20794	12700	2	24250	24300	2	19493	4640	2	14042	3120	2	13780	13800	2	18337	18300	2	20048
P16083	Ribosyldihydronicotinamide dehydrogenase [quinone] OS=Homo sapiens OX=9606 GN=NQO2 PE=1 SV=5	sp|P16083|NQO2_HUMAN	1	269657	270000	1	60511	60500	1	62787	62800	1	10821	10800	1	2499	2500	1	31768	31800	1	28237	28200	1	26945	26900	1	39064	39100	1	10603	10600	1	54579	54600	1	20245	20200	1	27602	27600	1	6226	6230	1	37327	37300	1	25702
P16152	Carbonyl reductase [NADPH] 1 OS=Homo sapiens OX=9606 GN=CBR1 PE=1 SV=3	sp|P16152|CBR1_HUMAN	11	1071283	1350000	11	803427	1030000	11	1307291	1670000	11	700308	900000	11	509450	680000	11	956662	1260000	11	657379	875000	11	1058351	1410000	11	850325	1120000	11	1022487	1330000	11	756101	946000	11	1005428	1310000	11	437809	573000	11	894197	1210000	11	917512	1200000	11	1121121
P16219	Short-chain specific acyl-CoA dehydrogenase, mitochondrial OS=Homo sapiens OX=9606 GN=ACADS PE=1 SV=1	sp|P16219|ACADS_HUMAN	2	14019	14000	2	15524	15500	2	21645	21600	2	11310	11300	2	12175	12200	2	18389	11500	2	9556	6470	2	14656	14700	2	16505	16500	2	13181	6040	2	20302	20300	2	14015	10700	2	14143	14100	2	12079	12100	2	11324	11300	2	15830
P16234	Platelet-derived growth factor receptor alpha OS=Homo sapiens OX=9606 GN=PDGFRA PE=1 SV=1	sp|P16234|PGFRA_HUMAN	1	10430	10400	1	7309	#N/A	1	15080	15100	1	8170	8170	1	6157	6160	1	10021	10000	1	6956	6960	1	4611	#N/A	1	12881	12900	1	7261	7260	1	10518	10500	1	9109	#N/A	1	3451	#N/A	1	8111	8110	1	7042	7040	1	5420
P16260	Graves disease carrier protein OS=Homo sapiens OX=9606 GN=SLC25A16 PE=1 SV=3	sp|P16260|GDC_HUMAN	1	54013	54000	1	27191	27200	1	15733	15700	1	28348	#N/A	1	21558	#N/A	1	40432	#N/A	1	36005	36000	1	17125	17100	1	32997	#N/A	1	38737	#N/A	1	36622	36600	1	27956	#N/A	1	25134	25100	1	32687	32700	1	6856	6860	1	42459
P16401	Histone H1.5 OS=Homo sapiens OX=9606 GN=HIST1H1B PE=1 SV=3	sp|P16401|H15_HUMAN	3	500986	501000	3	640276	640000	3	1493747	1490000	3	962861	963000	3	491605	492000	3	1173622	1170000	3	669520	670000	3	950059	950000	3	831931	832000	3	747803	748000	3	852835	853000	3	886265	886000	3	726483	726000	3	336044	336000	3	746395	746000	3	1125697
P16435	NADPH--cytochrome P450 reductase OS=Homo sapiens OX=9606 GN=POR PE=1 SV=2	sp|P16435|NCPR_HUMAN	15	422335	424000	15	231382	200000	15	301090	291000	15	451650	315000	15	215735	95400	15	370616	378000	15	278307	246000	15	511719	314000	15	454977	351000	15	486606	342000	15	387029	222000	15	414258	370000	15	281850	118000	15	257235	178000	15	297696	106000	15	407082
P16455	Methylated-DNA--protein-cysteine methyltransferase OS=Homo sapiens OX=9606 GN=MGMT PE=1 SV=1	sp|P16455|MGMT_HUMAN	3	438741	439000	3	290338	273000	3	91186	91200	3	396634	397000	3	312436	312000	3	456765	457000	3	84297	84300	3	449117	425000	3	439097	439000	3	439248	438000	3	432739	427000	3	147321	147000	3	268468	258000	3	19861	10900	3	43989	41500	3	42519
P16930	Fumarylacetoacetase OS=Homo sapiens OX=9606 GN=FAH PE=1 SV=2	sp|P16930|FAAA_HUMAN	4	36202	60100	4	39047	64200	4	46218	80100	4	46079	70500	4	31179	12200	4	57662	96300	4	22452	41400	4	41525	67800	4	20685	30300	4	49938	72200	4	36653	57400	4	38241	6030	4	51873	82900	4	41432	63600	4	35575	60400	4	37791
P17050	Alpha-N-acetylgalactosaminidase OS=Homo sapiens OX=9606 GN=NAGA PE=1 SV=2	sp|P17050|NAGAB_HUMAN	8	100217	128000	8	58359	73800	8	104992	136000	8	54609	74300	8	40738	53300	8	89302	86900	8	56387	85600	8	79162	125000	8	66323	101000	8	82893	129000	8	71711	93700	8	63625	97800	8	71161	48500	8	76518	120000	8	61884	104000	8	83614
P17152	Transmembrane protein 11, mitochondrial OS=Homo sapiens OX=9606 GN=TMEM11 PE=1 SV=1	sp|P17152|TMM11_HUMAN	3	32424	14900	3	8987	8990	3	28885	13600	3	8066	6410	3	6345	6350	3	11458	8260	3	14381	9330	3	13528	11200	3	10686	10700	3	16828	16800	3	11162	9100	3	19383	19400	3	12472	12500	3	5214	2390	3	11359	11400	3	17081
P17174	Aspartate aminotransferase, cytoplasmic OS=Homo sapiens OX=9606 GN=GOT1 PE=1 SV=3	sp|P17174|AATC_HUMAN	2	53961	54000	2	35589	27400	2	56098	56100	2	23718	23700	2	15750	14300	2	41678	41700	2	32986	33000	2	38451	38500	2	33334	31200	2	33876	33900	2	26438	18600	2	37349	37300	2	30656	25600	2	28865	24400	2	33083	33100	2	44041
P17252	Protein kinase C alpha type OS=Homo sapiens OX=9606 GN=PRKCA PE=1 SV=4	sp|P17252|KPCA_HUMAN	5	135580	204000	5	64498	70800	5	143025	194000	5	76835	105000	5	62399	84800	5	75674	103000	5	74247	103000	5	114753	163000	5	90095	129000	5	99300	142000	5	108541	128000	5	66673	84300	5	70616	100000	5	132879	191000	5	76483	111000	5	135523
P17275	Transcription factor jun-B OS=Homo sapiens OX=9606 GN=JUNB PE=1 SV=1	sp|P17275|JUNB_HUMAN	2	30568	30600	2	10958	2980	2	32853	32900	2	22484	2440	2	7307	7310	2	14705	6620	2	8316	4620	2	23022	23000	2	13413	13400	2	10350	10400	2	13829	13800	2	12510	7270	2	6074	6070	2	14260	14300	2	18086	5740	2	10168
P17301	Integrin alpha-2 OS=Homo sapiens OX=9606 GN=ITGA2 PE=1 SV=1	sp|P17301|ITA2_HUMAN	16	302085	349000	16	294679	283000	16	317006	338000	16	276322	301000	16	147437	155000	16	295706	297000	16	184091	190000	16	346723	384000	16	203707	205000	16	255793	270000	16	274989	290000	16	170456	171000	16	215712	221000	16	226440	205000	16	212651	223000	16	214597
P17302	Gap junction alpha-1 protein OS=Homo sapiens OX=9606 GN=GJA1 PE=1 SV=2	sp|P17302|CXA1_HUMAN	3	32144	32100	3	10927	5460	3	43305	43300	3	9103	9100	3	13161	6710	3	27400	27400	3	18209	8920	3	24436	24400	3	12028	12000	3	24473	24500	3	20640	20600	3	29550	27900	3	20800	13700	3	25577	18800	3	20485	9610	3	28116
P17535	Transcription factor jun-D OS=Homo sapiens OX=9606 GN=JUND PE=1 SV=3	sp|P17535|JUND_HUMAN	2	8778	8780	2	5094	5090	2	13812	13800	2	7047	5230	2	2280	2280	2	12402	12400	2	4853	4850	2	10855	6290	2	6484	5760	2	12587	12600	2	8613	8610	2	11451	11500	2	9409	6010	2	8376	8380	2	9979	6360	2	9904
P17568	NADH dehydrogenase [ubiquinone] 1 beta subcomplex subunit 7 OS=Homo sapiens OX=9606 GN=NDUFB7 PE=1 SV=4	sp|P17568|NDUB7_HUMAN	1	6334	6330	1	3149	3150	1	4759	4760	1	3700	3700	1	5385	5380	1	10828	10800	1	4485	4480	1	6432	6430	1	6975	6980	1	2630	2630	1	2822	2820	1	4067	4070	1	4907	4910	1	5641	5640	1	2846	2850	1	3207
P17655	Calpain-2 catalytic subunit OS=Homo sapiens OX=9606 GN=CAPN2 PE=1 SV=6	sp|P17655|CAN2_HUMAN	3	406670	1220000	3	269860	810000	3	548565	1650000	3	373566	1120000	3	257189	772000	3	412085	1240000	3	253831	761000	3	471208	1410000	3	386073	1160000	3	193832	582000	3	340767	1020000	3	378473	1140000	3	279531	839000	3	379100	1140000	3	286042	858000	3	403964
P17661	Desmin OS=Homo sapiens OX=9606 GN=DES PE=1 SV=3	sp|P17661|DESM_HUMAN	11	210623	203000	11	64362	61700	11	160033	150000	11	65850	65900	11	168984	169000	11	125368	125000	11	362231	344000	11	209922	203000	11	105445	105000	11	180601	162000	11	115021	115000	11	102376	85200	11	927689	918000	11	107433	107000	11	147416	141000	11	166297
P17812	CTP synthase 1 OS=Homo sapiens OX=9606 GN=CTPS1 PE=1 SV=2	sp|P17812|PYRG1_HUMAN	5	380222	111000	5	60551	9310	5	339694	220000	5	133211	3830	5	16651	16700	5	54417	15000	5	47082	27400	5	154111	92000	5	48580	20700	5	63219	44300	5	106872	23800	5	32791	7900	5	184295	21400	5	190102	58200	5	106266	17500	5	79692
P17844	Probable ATP-dependent RNA helicase DDX5 OS=Homo sapiens OX=9606 GN=DDX5 PE=1 SV=1	sp|P17844|DDX5_HUMAN	4	166375	333000	4	133537	267000	4	244211	488000	4	170333	341000	4	81975	164000	4	143731	287000	4	120092	240000	4	106564	213000	4	135916	272000	4	135014	270000	4	136648	273000	4	144735	289000	4	127503	255000	4	107639	215000	4	107480	215000	4	202119
P17900	Ganglioside GM2 activator OS=Homo sapiens OX=9606 GN=GM2A PE=1 SV=4	sp|P17900|SAP3_HUMAN	1	8221	8220	1	3197	3200	1	11365	11400	1	6076	6080	1	4300	4300	1	11857	11900	1	6504	6500	1	10816	10800	1	6043	6040	1	7395	7390	1	9548	9550	1	5253	5250	1	6642	6640	1	5177	5180	1	6695	6690	1	5225
P17931	Galectin-3 OS=Homo sapiens OX=9606 GN=LGALS3 PE=1 SV=5	sp|P17931|LEG3_HUMAN	13	649188	1080000	13	650385	1070000	13	1171485	1980000	13	865887	1390000	13	645578	1090000	13	1536477	2630000	13	631492	1070000	13	1490536	2500000	13	1095650	1860000	13	984221	1710000	13	1046367	1810000	13	1176659	1990000	13	652093	1150000	13	418027	700000	13	878296	1490000	13	1231418
P17980	26S proteasome regulatory subunit 6A OS=Homo sapiens OX=9606 GN=PSMC3 PE=1 SV=3	sp|P17980|PRS6A_HUMAN	19	452730	525000	19	247478	315000	19	415892	519000	19	420920	524000	19	257698	280000	19	344013	411000	19	268254	342000	19	339274	408000	19	269573	326000	19	312026	400000	19	354940	451000	19	342133	406000	19	323723	387000	19	346620	452000	19	277215	344000	19	415612
P17987	T-complex protein 1 subunit alpha OS=Homo sapiens OX=9606 GN=TCP1 PE=1 SV=1	sp|P17987|TCPA_HUMAN	32	1845512	2450000	32	1147820	1470000	32	2389036	3040000	32	1565241	2090000	32	987639	1100000	32	1902678	2240000	32	1363868	1620000	32	1772429	2280000	32	1467101	1580000	32	1735705	1970000	32	1632186	2110000	32	1811060	2040000	32	1566925	2020000	32	1349467	1750000	32	1413812	1830000	32	1921581
P18031	Tyrosine-protein phosphatase non-receptor type 1 OS=Homo sapiens OX=9606 GN=PTPN1 PE=1 SV=1	sp|P18031|PTN1_HUMAN	5	76479	78400	5	45910	68600	5	115191	125000	5	38338	59700	5	39318	64500	5	62509	95600	5	41588	61500	5	71914	94600	5	64497	88100	5	53729	80800	5	92170	109000	5	67706	97100	5	54300	71000	5	45430	64500	5	33495	40500	5	63026
P18065	Insulin-like growth factor-binding protein 2 OS=Homo sapiens OX=9606 GN=IGFBP2 PE=1 SV=2	sp|P18065|IBP2_HUMAN	1	4335	4330	1	6519	6520	1	13646	13600	1	3735	3730	1	1570	1570	1	7823	7820	1	4179	4180	1	4852	4850	1	4032	4030	1	5877	5880	1	5365	5360	1	4785	4780	1	5079	5080	1	4396	4400	1	9781	9780	1	3375
P18077	60S ribosomal protein L35a OS=Homo sapiens OX=9606 GN=RPL35A PE=1 SV=2	sp|P18077|RL35A_HUMAN	4	41158	41200	4	21611	21600	4	79974	80000	4	52398	52400	4	13345	13300	4	55582	55600	4	51091	51100	4	50995	51000	4	48707	48700	4	66893	66900	4	45900	45900	4	38421	38400	4	42896	42900	4	44261	44300	4	33303	33300	4	67400
P18084	Integrin beta-5 OS=Homo sapiens OX=9606 GN=ITGB5 PE=1 SV=1	sp|P18084|ITB5_HUMAN	12	177614	245000	12	100989	142000	12	121421	150000	12	98976	139000	12	82104	121000	12	166243	236000	12	131836	205000	12	142230	200000	12	125621	193000	12	174485	256000	12	163416	242000	12	123365	174000	12	103470	141000	12	93855	139000	12	140373	214000	12	113272
P18085	ADP-ribosylation factor 4 OS=Homo sapiens OX=9606 GN=ARF4 PE=1 SV=3	sp|P18085|ARF4_HUMAN	4	135246	135000	4	120070	92700	4	323069	282000	4	163161	163000	4	152883	153000	4	209703	187000	4	243033	243000	4	264579	233000	4	178593	179000	4	276132	276000	4	184224	184000	4	210962	211000	4	232199	232000	4	287025	287000	4	182409	182000	4	264278
P18124	60S ribosomal protein L7 OS=Homo sapiens OX=9606 GN=RPL7 PE=1 SV=1	sp|P18124|RL7_HUMAN	11	1133060	1380000	11	1639912	2240000	11	2499526	3180000	11	1722867	2080000	11	766932	996000	11	2147591	2710000	11	1144887	1340000	11	1993849	2460000	11	1676007	2080000	11	1576134	2080000	11	1555712	2020000	11	1798608	2400000	11	1687663	1940000	11	1399484	1890000	11	1373576	1570000	11	2169773
P18440	Arylamine N-acetyltransferase 1 OS=Homo sapiens OX=9606 GN=NAT1 PE=1 SV=2	sp|P18440|ARY1_HUMAN	1	9088	9090	1	6631	6630	1	14142	14100	1	8620	8620	1	6086	6090	1	12249	12200	1	7400	7400	1	8690	8690	1	4466	4470	1	13987	14000	1	6524	6520	1	4980	4980	1	9669	9670	1	7394	7390	1	7394	7390	1	6860
P18583-6	Isoform E of Protein SON OS=Homo sapiens OX=9606 GN=SON	sp|P18583-6|SON_HUMAN	1	19492	19500	1	5467	5470	1	28538	28500	1	5409	5410	1	11437	11400	1	18787	18800	1	8671	8670	1	15297	15300	1	13929	13900	1	25660	25700	1	21435	21400	1	11458	11500	1	19291	19300	1	22818	22800	1	19372	19400	1	28622
P18669	Phosphoglycerate mutase 1 OS=Homo sapiens OX=9606 GN=PGAM1 PE=1 SV=2	sp|P18669|PGAM1_HUMAN	9	407012	757000	9	257765	489000	9	544667	895000	9	379626	623000	9	235476	416000	9	441451	772000	9	332363	553000	9	476250	827000	9	364622	624000	9	523974	898000	9	498911	853000	9	423371	758000	9	369912	656000	9	362375	611000	9	303248	508000	9	433874
P18887	DNA repair protein XRCC1 OS=Homo sapiens OX=9606 GN=XRCC1 PE=1 SV=2	sp|P18887|XRCC1_HUMAN	2	213055	213000	2	28101	28100	2	48976	49000	2	5512	5510	2	24513	24500	2	9448	9450	2	29654	29700	2	9491	751	2	4732	2390	2	32045	32000	2	11377	11400	2	10830	10800	2	7949	3820	2	13017	13000	2	5499	5500	2	15261
P19338	Nucleolin OS=Homo sapiens OX=9606 GN=NCL PE=1 SV=3	sp|P19338|NUCL_HUMAN	11	659549	689000	11	820284	861000	11	1711174	1760000	11	1229447	1280000	11	733041	797000	11	1422947	1470000	11	944380	988000	11	1185371	1210000	11	1055475	1100000	11	1240437	1280000	11	1113869	1160000	11	1279630	1320000	11	1364537	1420000	11	1161128	1200000	11	957036	989000	11	1500407
P19387	DNA-directed RNA polymerase II subunit RPB3 OS=Homo sapiens OX=9606 GN=POLR2C PE=1 SV=2	sp|P19387|RPB3_HUMAN	3	19199	16400	3	4194	4190	3	15995	16000	3	10712	10700	3	4394	4390	3	7895	7900	3	4363	4360	3	7554	7550	3	10205	10200	3	6807	6810	3	8928	8930	3	9188	9190	3	7771	7770	3	4580	4580	3	4898	4900	3	8486
P19388	DNA-directed RNA polymerases I, II, and III subunit RPABC1 OS=Homo sapiens OX=9606 GN=POLR2E PE=1 SV=4	sp|P19388|RPAB1_HUMAN	4	37227	37200	4	33941	32200	4	34225	26700	4	22478	18700	4	64704	64700	4	46350	46400	4	51665	13200	4	29115	29100	4	24456	21100	4	54941	52800	4	24016	24000	4	32813	28700	4	31954	32000	4	24173	24200	4	42504	42500	4	25126
P19404	NADH dehydrogenase [ubiquinone] flavoprotein 2, mitochondrial OS=Homo sapiens OX=9606 GN=NDUFV2 PE=1 SV=2	sp|P19404|NDUV2_HUMAN	4	58941	58900	4	39049	6890	4	51202	24900	4	35215	27800	4	17652	17700	4	30547	28500	4	29644	18200	4	43783	19500	4	15557	2540	4	30121	27200	4	26570	9520	4	33552	33600	4	28299	28300	4	51423	36000	4	54308	28900	4	49126
P19447	General transcription and DNA repair factor IIH helicase subunit XPB OS=Homo sapiens OX=9606 GN=ERCC3 PE=1 SV=1	sp|P19447|ERCC3_HUMAN	2	28981	58000	2	13859	27700	2	56676	113000	2	46358	92700	2	12490	25000	2	49438	98900	2	54038	108000	2	26110	52200	2	15435	30900	2	27242	54500	2	49430	98900	2	18152	36300	2	47158	94300	2	16748	33500	2	58353	117000	2	30060
P19474	E3 ubiquitin-protein ligase TRIM21 OS=Homo sapiens OX=9606 GN=TRIM21 PE=1 SV=1	sp|P19474|RO52_HUMAN	1	4825	4830	1	4878	4880	1	8806	8810	1	6047	6050	1	1929	1930	1	8176	8180	1	8927	8930	1	6294	6290	1	6531	6530	1	10463	10500	1	6053	6050	1	10557	10600	1	5610	5610	1	3472	3470	1	10221	10200	1	6293
P19623	Spermidine synthase OS=Homo sapiens OX=9606 GN=SRM PE=1 SV=1	sp|P19623|SPEE_HUMAN	12	491071	553000	12	402898	524000	12	568451	753000	12	362003	502000	12	286236	379000	12	550663	767000	12	376899	503000	12	444183	607000	12	328069	476000	12	422550	584000	12	425900	597000	12	569297	731000	12	481818	656000	12	337361	459000	12	362595	503000	12	522493
P19784	Casein kinase II subunit alpha' OS=Homo sapiens OX=9606 GN=CSNK2A2 PE=1 SV=1	sp|P19784|CSK22_HUMAN	6	69868	109000	6	41115	51100	6	115046	81800	6	54999	62700	6	38843	65400	6	70246	104000	6	44318	66400	6	67211	81800	6	72695	61600	6	80401	78500	6	79033	104000	6	41551	54300	6	59547	56500	6	47611	64800	6	70411	108000	6	91138
P19823	Inter-alpha-trypsin inhibitor heavy chain H2 OS=Homo sapiens OX=9606 GN=ITIH2 PE=1 SV=2	sp|P19823|ITIH2_HUMAN	2	5815	5820	2	4671	4670	2	5354	5350	2	3755	3760	2	3905	3910	2	5606	5610	2	1613	778	2	3556	3560	2	2269	905	2	5526	3820	2	3355	3360	2	4364	4360	2	3310	3310	2	4516	1400	2	2954	2950	2	7511
P19971	Thymidine phosphorylase OS=Homo sapiens OX=9606 GN=TYMP PE=1 SV=2	sp|P19971|TYPH_HUMAN	1	9456	9460	1	3069	3070	1	15800	15800	1	1817	1820	1	2267	2270	1	5655	5650	1	4385	4390	1	5315	5320	1	6360	6360	1	5559	5560	1	6362	6360	1	4325	4320	1	5565	5560	1	3331	3330	1	7491	7490	1	4449
P20042	Eukaryotic translation initiation factor 2 subunit 2 OS=Homo sapiens OX=9606 GN=EIF2S2 PE=1 SV=2	sp|P20042|IF2B_HUMAN	12	188215	180000	12	143222	138000	12	276922	255000	12	196805	197000	12	149379	127000	12	217634	211000	12	185698	183000	12	209474	209000	12	184608	185000	12	233024	233000	12	199835	178000	12	233770	234000	12	224855	225000	12	207514	201000	12	178783	174000	12	234048
P20336	Ras-related protein Rab-3A OS=Homo sapiens OX=9606 GN=RAB3A PE=1 SV=1	sp|P20336|RAB3A_HUMAN	2	120669	121000	2	76093	76100	2	183685	184000	2	102632	103000	2	62252	62300	2	83874	83900	2	76632	76600	2	122146	122000	2	102337	97200	2	90968	91000	2	80516	80500	2	54153	51000	2	69238	69200	2	77401	77400	2	63982	64000	2	96321
P20337	Ras-related protein Rab-3B OS=Homo sapiens OX=9606 GN=RAB3B PE=1 SV=2	sp|P20337|RAB3B_HUMAN	5	91292	107000	5	62937	77600	5	117815	147000	5	126975	175000	5	63106	92000	5	106124	150000	5	82622	117000	5	90684	131000	5	75700	105000	5	83304	116000	5	76864	105000	5	60522	80300	5	48338	65700	5	63981	85000	5	63881	84100	5	77438
P20338	Ras-related protein Rab-4A OS=Homo sapiens OX=9606 GN=RAB4A PE=1 SV=3	sp|P20338|RAB4A_HUMAN	2	173289	173000	2	23244	23200	2	207780	208000	2	62160	62200	2	107146	107000	2	226558	227000	2	142522	143000	2	54209	54200	2	136011	136000	2	39755	31500	2	44597	44600	2	188742	189000	2	136715	137000	2	44250	44300	2	156122	156000	2	56353
P20618	Proteasome subunit beta type-1 OS=Homo sapiens OX=9606 GN=PSMB1 PE=1 SV=2	sp|P20618|PSB1_HUMAN	11	352266	605000	11	276546	446000	11	450200	800000	11	343533	558000	11	219411	353000	11	413873	651000	11	295660	492000	11	401758	675000	11	268430	469000	11	382328	595000	11	350301	611000	11	340490	582000	11	329349	571000	11	296479	466000	11	314604	528000	11	437246
P20645	Cation-dependent mannose-6-phosphate receptor OS=Homo sapiens OX=9606 GN=M6PR PE=1 SV=1	sp|P20645|MPRD_HUMAN	2	18723	#N/A	2	4375	2170	2	17886	11700	2	6842	1290	2	1288	1290	2	6724	2910	2	2647	2650	2	14015	2360	2	4388	2080	2	2892	2890	2	15454	#N/A	2	1949	1950	2	12204	7040	2	3758	1840	2	8993	2130	2	4044
P20674	Cytochrome c oxidase subunit 5A, mitochondrial OS=Homo sapiens OX=9606 GN=COX5A PE=1 SV=2	sp|P20674|COX5A_HUMAN	4	191341	334000	4	120991	213000	4	248491	443000	4	180750	329000	4	98416	176000	4	210929	387000	4	138740	249000	4	197653	357000	4	151158	268000	4	151082	266000	4	177701	334000	4	201704	369000	4	166680	300000	4	119895	221000	4	133799	239000	4	185787
P20700	Lamin-B1 OS=Homo sapiens OX=9606 GN=LMNB1 PE=1 SV=2	sp|P20700|LMNB1_HUMAN	14	355284	384000	14	314957	332000	14	431714	447000	14	340868	373000	14	146214	129000	14	480933	450000	14	299078	307000	14	399282	417000	14	248793	256000	14	338250	331000	14	327149	325000	14	383938	392000	14	304633	336000	14	262359	266000	14	265230	269000	14	459203
P20749	B-cell lymphoma 3 protein OS=Homo sapiens OX=9606 GN=BCL3 PE=1 SV=2	sp|P20749|BCL3_HUMAN	1	11532	11500	1	10146	10100	1	12166	12200	1	5449	5450	1	3867	3870	1	13095	13100	1	11447	11400	1	16962	17000	1	13115	13100	1	17253	17300	1	8601	8600	1	5871	#N/A	1	12487	12500	1	7777	7780	1	11699	11700	1	13834
P20908	Collagen alpha-1(V) chain OS=Homo sapiens OX=9606 GN=COL5A1 PE=1 SV=3	sp|P20908|CO5A1_HUMAN	14	318928	549000	14	132536	161000	14	274848	459000	14	164711	283000	14	171171	233000	14	231118	361000	14	168998	243000	14	266192	322000	14	127530	218000	14	213446	374000	14	205720	266000	14	220022	365000	14	387106	480000	14	238718	309000	14	229996	311000	14	184993
P20962	Parathymosin OS=Homo sapiens OX=9606 GN=PTMS PE=1 SV=2	sp|P20962|PTMS_HUMAN	1	86447	86400	1	76998	77000	1	189108	189000	1	158768	159000	1	122465	122000	1	236481	236000	1	160992	161000	1	167574	168000	1	145136	145000	1	164192	164000	1	154706	155000	1	133802	134000	1	186159	186000	1	123161	123000	1	129003	129000	1	163085
P21266	Glutathione S-transferase Mu 3 OS=Homo sapiens OX=9606 GN=GSTM3 PE=1 SV=3	sp|P21266|GSTM3_HUMAN	6	178954	44600	6	39123	33000	6	144927	102000	6	59455	45500	6	41048	12000	6	53361	49000	6	62957	63000	6	74985	60200	6	56594	18300	6	108886	87000	6	80533	80500	6	52957	36300	6	71787	40600	6	74246	74200	6	77139	59300	6	59913
P21281	V-type proton ATPase subunit B, brain isoform OS=Homo sapiens OX=9606 GN=ATP6V1B2 PE=1 SV=3	sp|P21281|VATB2_HUMAN	12	379565	342000	12	165445	150000	12	293828	274000	12	225969	211000	12	148233	141000	12	203312	190000	12	240375	235000	12	262606	263000	12	196945	182000	12	217456	201000	12	286555	252000	12	204467	169000	12	207527	208000	12	291163	250000	12	223255	195000	12	243839
P21283	V-type proton ATPase subunit C 1 OS=Homo sapiens OX=9606 GN=ATP6V1C1 PE=1 SV=4	sp|P21283|VATC1_HUMAN	4	82369	129000	4	47850	41800	4	96287	148000	4	51020	79100	4	24601	41600	4	38437	44700	4	44523	44700	4	39877	50200	4	35791	43500	4	51038	69700	4	38131	54100	4	50246	81100	4	48616	76700	4	88062	156000	4	51010	78000	4	66034
P21291	Cysteine and glycine-rich protein 1 OS=Homo sapiens OX=9606 GN=CSRP1 PE=1 SV=3	sp|P21291|CSRP1_HUMAN	6	1027175	1280000	6	306097	359000	6	830217	1040000	6	537873	667000	6	320188	394000	6	734413	900000	6	342792	419000	6	491004	609000	6	334649	410000	6	287874	355000	6	278720	336000	6	392008	485000	6	585167	711000	6	807447	1000000	6	422016	518000	6	514910
P21399	Cytoplasmic aconitate hydratase OS=Homo sapiens OX=9606 GN=ACO1 PE=1 SV=3	sp|P21399|ACOC_HUMAN	16	185758	189000	16	227650	263000	16	189966	240000	16	233085	285000	16	144931	182000	16	201636	197000	16	294133	330000	16	314015	346000	16	117773	153000	16	427036	309000	16	187796	230000	16	213549	251000	16	126977	179000	16	125263	167000	16	120117	165000	16	315463
P21589	5'-nucleotidase OS=Homo sapiens OX=9606 GN=NT5E PE=1 SV=1	sp|P21589|5NTD_HUMAN	1	73177	73200	1	37561	37600	1	84677	84700	1	46915	46900	1	53596	53600	1	70224	70200	1	68006	68000	1	81012	81000	1	69758	69800	1	85855	85900	1	81758	81800	1	52419	52400	1	52936	52900	1	71328	71300	1	79841	79800	1	77880
P21796	Voltage-dependent anion-selective channel protein 1 OS=Homo sapiens OX=9606 GN=VDAC1 PE=1 SV=2	sp|P21796|VDAC1_HUMAN	16	2138072	3600000	16	1440224	2320000	16	2715761	4280000	16	1752859	2770000	16	1079211	1720000	16	2476778	3890000	16	1592917	2560000	16	2087541	3360000	16	1875627	2970000	16	2407247	3850000	16	2057989	3260000	16	2336477	3770000	16	1908688	2950000	16	2474319	3890000	16	1671033	2680000	16	1978676
P21810	Biglycan OS=Homo sapiens OX=9606 GN=BGN PE=1 SV=2	sp|P21810|PGS1_HUMAN	5	39606	27600	5	48629	46000	5	84295	78200	5	74510	74500	5	41557	38700	5	59865	58500	5	41783	41800	5	75215	68900	5	26964	18200	5	75624	74100	5	50195	50200	5	52525	43500	5	41366	41400	5	49997	44500	5	49797	40800	5	90411
P21912	Succinate dehydrogenase [ubiquinone] iron-sulfur subunit, mitochondrial OS=Homo sapiens OX=9606 GN=SDHB PE=1 SV=3	sp|P21912|SDHB_HUMAN	6	162544	106000	6	41326	38100	6	161331	74800	6	52819	46900	6	35909	35900	6	50846	46400	6	57865	54100	6	117961	57000	6	46640	44900	6	38456	34700	6	100534	41600	6	43104	36100	6	114441	53800	6	96866	39000	6	79147	37800	6	61535
P21926	CD9 antigen OS=Homo sapiens OX=9606 GN=CD9 PE=1 SV=4	sp|P21926|CD9_HUMAN	1	6541	6540	1	105068	105000	1	24530	24500	1	35458	35500	1	11946	11900	1	28764	28800	1	11294	11300	1	17968	18000	1	12212	12200	1	24977	25000	1	22755	22800	1	17192	17200	1	7559	7560	1	12364	12400	1	11872	11900	1	18835
P21953	2-oxoisovalerate dehydrogenase subunit beta, mitochondrial OS=Homo sapiens OX=9606 GN=BCKDHB PE=1 SV=2	sp|P21953|ODBB_HUMAN	1	67738	67700	1	8853	#N/A	1	9749	9750	1	9462	9460	1	6073	6070	1	4990	#N/A	1	2614	#N/A	1	25681	#N/A	1	5221	5220	1	6673	#N/A	1	10801	10800	1	7464	#N/A	1	16628	#N/A	1	21448	#N/A	1	28903	#N/A	1	9257
P21980	Protein-glutamine gamma-glutamyltransferase 2 OS=Homo sapiens OX=9606 GN=TGM2 PE=1 SV=2	sp|P21980|TGM2_HUMAN	9	255498	257000	9	239357	272000	9	482809	531000	9	277692	285000	9	234710	269000	9	378150	446000	9	443109	542000	9	312094	378000	9	312829	354000	9	529773	634000	9	379237	447000	9	199379	229000	9	192123	180000	9	300616	329000	9	325392	405000	9	530396
P22033	Methylmalonyl-CoA mutase, mitochondrial OS=Homo sapiens OX=9606 GN=MUT PE=1 SV=4	sp|P22033|MUTA_HUMAN	4	297390	297000	4	73188	73200	4	127073	110000	4	73179	69400	4	62079	62100	4	104986	105000	4	101303	101000	4	130228	130000	4	105635	101000	4	131437	131000	4	152918	142000	4	134526	135000	4	61439	61400	4	80156	80200	4	110729	111000	4	122322
P22059	Oxysterol-binding protein 1 OS=Homo sapiens OX=9606 GN=OSBP PE=1 SV=1	sp|P22059|OSBP1_HUMAN	6	307952	579000	6	42088	50600	6	96881	139000	6	213958	392000	6	96915	172000	6	266672	497000	6	161230	297000	6	304987	569000	6	57647	81700	6	64961	78600	6	54601	80500	6	52071	77800	6	49852	68200	6	137717	249000	6	198372	367000	6	297970
P22087	rRNA 2'-O-methyltransferase fibrillarin OS=Homo sapiens OX=9606 GN=FBL PE=1 SV=2	sp|P22087|FBRL_HUMAN	4	62586	62600	4	69234	66900	4	148873	143000	4	79514	79500	4	42031	20900	4	112332	38400	4	69812	19900	4	78428	78400	4	61668	19000	4	70716	34900	4	76150	76200	4	63731	35100	4	114640	112000	4	79234	79200	4	67542	66000	4	105243
P22090	40S ribosomal protein S4, Y isoform 1 OS=Homo sapiens OX=9606 GN=RPS4Y1 PE=1 SV=2	sp|P22090|RS4Y1_HUMAN	3	94296	149000	3	29621	52900	3	110784	207000	3	87107	134000	3	57285	81700	3	137428	194000	3	22551	39000	3	109832	206000	3	96207	125000	3	116726	158000	3	41800	57300	3	40870	41900	3	105338	153000	3	33104	56200	3	34693	57200	3	49701
P22102	Trifunctional purine biosynthetic protein adenosine-3 OS=Homo sapiens OX=9606 GN=GART PE=1 SV=1	sp|P22102|PUR2_HUMAN	13	624969	660000	13	467828	484000	13	713380	759000	13	566394	573000	13	378444	339000	13	785330	799000	13	573409	587000	13	768301	803000	13	645851	647000	13	800569	786000	13	687115	726000	13	641211	654000	13	539692	573000	13	542536	538000	13	612620	636000	13	841871
P22234	Multifunctional protein ADE2 OS=Homo sapiens OX=9606 GN=PAICS PE=1 SV=3	sp|P22234|PUR6_HUMAN	2	18054	36100	2	29665	59300	2	36956	73900	2	82009	164000	2	53643	107000	2	45050	90100	2	53273	107000	2	45745	91500	2	40420	80800	2	69359	139000	2	63869	128000	2	39881	79800	2	52150	104000	2	39805	79600	2	33482	67000	2	42859
P22413	Ectonucleotide pyrophosphatase/phosphodiesterase family member 1 OS=Homo sapiens OX=9606 GN=ENPP1 PE=1 SV=2	sp|P22413|ENPP1_HUMAN	12	251225	168000	12	66729	41200	12	224665	126000	12	158567	106000	12	124608	141000	12	109566	120000	12	205228	203000	12	207806	144000	12	96959	86400	12	88965	88000	12	156607	186000	12	52085	24000	12	115272	61800	12	184946	245000	12	258154	165000	12	281189
P22612	cAMP-dependent protein kinase catalytic subunit gamma OS=Homo sapiens OX=9606 GN=PRKACG PE=1 SV=3	sp|P22612|KAPCG_HUMAN	1	18971	19000	1	13372	13400	1	24386	24400	1	50245	50200	1	22164	22200	1	9476	9480	1	8552	#N/A	1	26043	26000	1	16306	16300	1	54212	54200	1	57758	57800	1	17701	17700	1	16440	16400	1	5055	5060	1	15979	16000	1	18620
P22626	Heterogeneous nuclear ribonucleoproteins A2/B1 OS=Homo sapiens OX=9606 GN=HNRNPA2B1 PE=1 SV=2	sp|P22626|ROA2_HUMAN	1	252213	252000	1	166724	167000	1	289672	290000	1	189953	190000	1	103417	103000	1	251128	251000	1	153972	154000	1	176546	177000	1	166469	166000	1	165939	166000	1	193268	193000	1	233532	234000	1	183521	184000	1	104750	105000	1	157856	158000	1	186208
P22681	E3 ubiquitin-protein ligase CBL OS=Homo sapiens OX=9606 GN=CBL PE=1 SV=2	sp|P22681|CBL_HUMAN	3	12463	12500	3	6965	6230	3	16838	16800	3	12459	12500	3	12602	12600	3	4338	4340	3	13388	13400	3	26475	26500	3	3347	2270	3	8914	8910	3	4069	4070	3	5807	5810	3	5374	5370	3	3619	3060	3	7637	5060	3	6792
P22695	Cytochrome b-c1 complex subunit 2, mitochondrial OS=Homo sapiens OX=9606 GN=UQCRC2 PE=1 SV=3	sp|P22695|QCR2_HUMAN	15	258844	396000	15	161739	135000	15	307677	419000	15	234199	149000	15	114524	99000	15	235479	201000	15	221586	199000	15	266803	363000	15	183893	147000	15	208379	212000	15	250293	334000	15	254263	214000	15	224179	279000	15	231559	290000	15	186555	228000	15	284995
P23193	Transcription elongation factor A protein 1 OS=Homo sapiens OX=9606 GN=TCEA1 PE=1 SV=2	sp|P23193|TCEA1_HUMAN	2	267668	260000	2	208616	209000	2	79842	79800	2	199639	200000	2	158666	156000	2	192384	185000	2	169457	168000	2	238057	234000	2	296301	296000	2	247456	242000	2	235153	235000	2	226052	225000	2	210649	211000	2	191714	192000	2	237417	237000	2	21135
P23246	Splicing factor, proline- and glutamine-rich OS=Homo sapiens OX=9606 GN=SFPQ PE=1 SV=2	sp|P23246|SFPQ_HUMAN	2	65872	65900	2	42799	29900	2	95899	95900	2	67572	48600	2	26987	27000	2	61135	61100	2	40235	40200	2	55492	55500	2	38762	33400	2	52789	52800	2	45479	45500	2	44071	44100	2	55868	55900	2	45167	45200	2	37027	37000	2	70607
P23258	Tubulin gamma-1 chain OS=Homo sapiens OX=9606 GN=TUBG1 PE=1 SV=2	sp|P23258|TBG1_HUMAN	1	11810	11800	1	10227	10200	1	7061	7060	1	5150	5150	1	3164	3160	1	4503	4500	1	10653	10700	1	4161	4160	1	3905	3910	1	12761	#N/A	1	8441	8440	1	6333	#N/A	1	7360	7360	1	4832	4830	1	5109	5110	1	13658
P23284	Peptidyl-prolyl cis-trans isomerase B OS=Homo sapiens OX=9606 GN=PPIB PE=1 SV=2	sp|P23284|PPIB_HUMAN	15	7456308	9930000	15	3553813	4850000	15	9000041	12700000	15	5285528	7310000	15	5053548	7010000	15	8610922	11900000	15	6286179	8730000	15	9140805	12700000	15	6362447	8760000	15	9193106	12800000	15	7869889	11000000	15	7712926	10700000	15	8415933	11900000	15	7639319	10800000	15	6730517	9240000	15	8806004
P23368	NAD-dependent malic enzyme, mitochondrial OS=Homo sapiens OX=9606 GN=ME2 PE=1 SV=1	sp|P23368|MAOM_HUMAN	2	80875	162000	2	31330	62700	2	55819	112000	2	32180	64400	2	31948	63900	2	32825	65700	2	25113	50200	2	54729	109000	2	27960	55900	2	47235	94500	2	45083	90200	2	49132	98300	2	32988	66000	2	34248	68500	2	39852	79700	2	36762
P23381	Tryptophan--tRNA ligase, cytoplasmic OS=Homo sapiens OX=9606 GN=WARS PE=1 SV=2	sp|P23381|SYWC_HUMAN	2	60396	121000	2	45590	91200	2	48070	96100	2	57317	115000	2	78373	157000	2	66246	132000	2	76892	154000	2	70469	141000	2	58663	117000	2	116928	234000	2	153195	306000	2	120230	240000	2	139752	280000	2	105987	212000	2	88270	177000	2	77123
P23396	40S ribosomal protein S3 OS=Homo sapiens OX=9606 GN=RPS3 PE=1 SV=2	sp|P23396|RS3_HUMAN	2	252859	506000	2	244503	489000	2	442198	884000	2	339635	679000	2	187504	375000	2	343211	686000	2	276524	553000	2	352401	705000	2	317445	635000	2	341297	683000	2	331738	663000	2	370317	741000	2	308679	617000	2	272971	546000	2	268873	538000	2	382906
P23434	Glycine cleavage system H protein, mitochondrial OS=Homo sapiens OX=9606 GN=GCSH PE=1 SV=2	sp|P23434|GCSH_HUMAN	3	42315	62000	3	32001	44000	3	46949	68500	3	44819	71300	3	14321	18800	3	42444	60300	3	38458	64200	3	69131	111000	3	49785	80900	3	40935	37300	3	48134	74600	3	53500	47900	3	36326	48400	3	58652	94900	3	43368	67400	3	51821
P23458	Tyrosine-protein kinase JAK1 OS=Homo sapiens OX=9606 GN=JAK1 PE=1 SV=2	sp|P23458|JAK1_HUMAN	6	69452	68600	6	61572	61600	6	79344	79300	6	84817	84800	6	66712	66700	6	53361	53400	6	71574	71600	6	88854	88900	6	70904	70900	6	80816	76200	6	50379	50400	6	44797	44800	6	53933	49700	6	68707	68700	6	44644	42200	6	70883
P23526	Adenosylhomocysteinase OS=Homo sapiens OX=9606 GN=AHCY PE=1 SV=4	sp|P23526|SAHH_HUMAN	2	249800	250000	2	163638	164000	2	296271	296000	2	191382	191000	2	108323	108000	2	262521	263000	2	149616	150000	2	241014	241000	2	208636	209000	2	181507	182000	2	209991	210000	2	264112	264000	2	188948	189000	2	150844	151000	2	184582	185000	2	261590
P23528	Cofilin-1 OS=Homo sapiens OX=9606 GN=CFL1 PE=1 SV=3	sp|P23528|COF1_HUMAN	5	2666519	5330000	5	1419257	2840000	5	2848983	5690000	5	2586807	5170000	5	1342966	2680000	5	2406330	4810000	5	1858723	3710000	5	2362924	4720000	5	1811826	3620000	5	2078481	4150000	5	2551836	5100000	5	2092929	4180000	5	1945130	3890000	5	1839603	3680000	5	2060480	4120000	5	2412481
P23588	Eukaryotic translation initiation factor 4B OS=Homo sapiens OX=9606 GN=EIF4B PE=1 SV=2	sp|P23588|IF4B_HUMAN	1	3798	3800	1	6626	6630	1	103910	#N/A	1	2717	2720	1	3304	3300	1	2545	2550	1	4698	4700	1	7794	#N/A	1	10685	10700	1	3043	3040	1	7216	7220	1	2817	2820	1	10714	10700	1	3616	3620	1	6344	6340	1	3509
P23610	Factor VIII intron 22 protein OS=Homo sapiens OX=9606 GN=F8A1 PE=1 SV=2	sp|P23610|F8I2_HUMAN	2	18757	18800	2	13901	13900	2	20418	3800	2	7805	7810	2	3593	3590	2	17518	16400	2	5190	5190	2	17634	1210	2	11178	11200	2	10798	10800	2	14310	14300	2	7740	1010	2	13402	1200	2	10992	620	2	8021	8020	2	15468
P23743	Diacylglycerol kinase alpha OS=Homo sapiens OX=9606 GN=DGKA PE=1 SV=3	sp|P23743|DGKA_HUMAN	6	89975	66100	6	29504	29500	6	67052	67100	6	23476	23500	6	19826	19800	6	32448	8420	6	23775	19300	6	48627	23400	6	27881	27900	6	38794	24700	6	33197	9770	6	21785	21800	6	54715	35300	6	25650	12700	6	22535	10000	6	48964
P23786	Carnitine O-palmitoyltransferase 2, mitochondrial OS=Homo sapiens OX=9606 GN=CPT2 PE=1 SV=2	sp|P23786|CPT2_HUMAN	2	841573	#N/A	2	26280	26300	2	473497	2710	2	17925	17900	2	7733	7730	2	19107	19100	2	10376	10400	2	11449	10200	2	9013	9010	2	13717	13700	2	7482	7480	2	7658	7660	2	21846	21800	2	11694	11700	2	14077	14100	2	15015
P23921	Ribonucleoside-diphosphate reductase large subunit OS=Homo sapiens OX=9606 GN=RRM1 PE=1 SV=1	sp|P23921|RIR1_HUMAN	14	89044	93400	14	81313	79700	14	151897	190000	14	96207	101000	14	72528	67700	14	88527	79400	14	97852	123000	14	92252	97600	14	88405	94500	14	128129	132000	14	77139	84400	14	72518	73200	14	87731	89000	14	71279	77000	14	90841	96400	14	100788
P24385	G1/S-specific cyclin-D1 OS=Homo sapiens OX=9606 GN=CCND1 PE=1 SV=1	sp|P24385|CCND1_HUMAN	1	7935	7940	1	4648	4650	1	13515	13500	1	9342	9340	1	8505	8510	1	12549	12500	1	15638	15600	1	11800	11800	1	4356	#N/A	1	6469	6470	1	8202	8200	1	11467	11500	1	10192	10200	1	5661	#N/A	1	8400	8400	1	10890
P24386	Rab proteins geranylgeranyltransferase component A 1 OS=Homo sapiens OX=9606 GN=CHM PE=1 SV=3	sp|P24386|RAE1_HUMAN	2	19405	10300	2	15658	15700	2	19911	19900	2	16931	16900	2	10362	#N/A	2	16147	16100	2	22297	22300	2	14718	14700	2	16794	14000	2	23019	23000	2	40214	40200	2	33290	19500	2	18484	18500	2	16116	16100	2	26165	26200	2	24098
P24387	Corticotropin-releasing factor-binding protein OS=Homo sapiens OX=9606 GN=CRHBP PE=1 SV=2	sp|P24387|CRHBP_HUMAN	1	37255	37300	1	7489	7490	1	9318	9320	1	11537	11500	1	23478	23500	1	43121	43100	1	25294	25300	1	50185	50200	1	28643	28600	1	63615	63600	1	48550	48600	1	54815	54800	1	78880	78900	1	33183	33200	1	28667	28700	1	24925
P24534	Elongation factor 1-beta OS=Homo sapiens OX=9606 GN=EEF1B2 PE=1 SV=3	sp|P24534|EF1B_HUMAN	5	570426	570000	5	488747	296000	5	763133	763000	5	537934	368000	5	247691	248000	5	576539	577000	5	404076	315000	5	547674	548000	5	458273	336000	5	528864	394000	5	552902	553000	5	415860	416000	5	510548	511000	5	596831	414000	5	486000	486000	5	593474
P24539	ATP synthase F(0) complex subunit B1, mitochondrial OS=Homo sapiens OX=9606 GN=ATP5F1 PE=1 SV=2	sp|P24539|AT5F1_HUMAN	9	71892	97200	9	32151	39200	9	83328	79300	9	46286	63900	9	29245	42200	9	52761	75400	9	52852	81100	9	49485	65000	9	44366	56700	9	64090	89600	9	58291	88300	9	50113	69500	9	35226	51600	9	57124	85500	9	37748	53700	9	55143
P24593	Insulin-like growth factor-binding protein 5 OS=Homo sapiens OX=9606 GN=IGFBP5 PE=1 SV=1	sp|P24593|IBP5_HUMAN	1	3685	3680	1	3686	3690	1	4159	4160	1	3814	3810	1	974	974	1	2454	2450	1	780	780	1	2261	2260	1	385	385	1	1765	1770	1	4930	4930	1	999	999	1	2608	2610	1	3340	3340	1	2624	2620	1	4604
P24752	Acetyl-CoA acetyltransferase, mitochondrial OS=Homo sapiens OX=9606 GN=ACAT1 PE=1 SV=1	sp|P24752|THIL_HUMAN	8	89486	85600	8	69236	46300	8	191912	127000	8	87688	62100	8	35624	34800	8	69815	69800	8	82013	64400	8	133571	80800	8	65142	62600	8	88193	83800	8	134379	86700	8	61238	60700	8	142216	97300	8	99057	60800	8	96591	60100	8	102350
P24844	Myosin regulatory light polypeptide 9 OS=Homo sapiens OX=9606 GN=MYL9 PE=1 SV=4	sp|P24844|MYL9_HUMAN	2	355916	712000	2	144897	290000	2	368671	737000	2	280561	561000	2	136080	272000	2	273184	546000	2	189641	379000	2	187650	375000	2	149265	299000	2	166908	334000	2	161560	323000	2	141061	282000	2	312078	624000	2	382517	765000	2	168916	338000	2	372353
P24928	DNA-directed RNA polymerase II subunit RPB1 OS=Homo sapiens OX=9606 GN=POLR2A PE=1 SV=2	sp|P24928|RPB1_HUMAN	11	252206	248000	11	213653	166000	11	310808	289000	11	177560	117000	11	79590	79600	11	237450	188000	11	96275	89000	11	232868	231000	11	150709	125000	11	157200	135000	11	202297	190000	11	80137	76500	11	106796	39000	11	159162	96700	11	183078	101000	11	235929
P25098	Beta-adrenergic receptor kinase 1 OS=Homo sapiens OX=9606 GN=GRK2 PE=1 SV=2	sp|P25098|ARBK1_HUMAN	2	27284	27300	2	23219	23200	2	88247	88200	2	27157	#N/A	2	6625	6630	2	21837	4830	2	33102	4850	2	47962	4600	2	15980	2150	2	16532	3940	2	38518	4570	2	18007	4960	2	71401	71400	2	52915	52900	2	47704	47700	2	50264
P25398	40S ribosomal protein S12 OS=Homo sapiens OX=9606 GN=RPS12 PE=1 SV=3	sp|P25398|RS12_HUMAN	8	636080	828000	8	609671	768000	8	1255225	1610000	8	811272	1020000	8	492794	634000	8	885026	1160000	8	663205	859000	8	872382	1090000	8	715265	903000	8	772698	975000	8	794780	972000	8	971112	1250000	8	993822	1220000	8	746582	919000	8	634562	831000	8	1028212
P25787	Proteasome subunit alpha type-2 OS=Homo sapiens OX=9606 GN=PSMA2 PE=1 SV=2	sp|P25787|PSA2_HUMAN	12	554837	863000	12	489532	792000	12	631759	992000	12	476221	774000	12	331094	545000	12	561579	847000	12	410403	656000	12	524647	818000	12	438493	679000	12	430777	682000	12	504925	796000	12	491280	735000	12	433990	664000	12	409752	635000	12	417703	633000	12	554695
P25789	Proteasome subunit alpha type-4 OS=Homo sapiens OX=9606 GN=PSMA4 PE=1 SV=1	sp|P25789|PSA4_HUMAN	3	268407	268000	3	198902	199000	3	290791	291000	3	316984	317000	3	194224	194000	3	453767	454000	3	249476	249000	3	406118	406000	3	321084	321000	3	338160	338000	3	344257	344000	3	369217	369000	3	292483	292000	3	267122	267000	3	342846	343000	3	412456
P25963	NF-kappa-B inhibitor alpha OS=Homo sapiens OX=9606 GN=NFKBIA PE=1 SV=1	sp|P25963|IKBA_HUMAN	1	3243	3240	1	5163	5160	1	11678	11700	1	3441	3440	1	5121	5120	1	6039	6040	1	5089	5090	1	10986	11000	1	3606	3610	1	5094	5090	1	2432	2430	1	5099	5100	1	2640	2640	1	2371	#N/A	1	4658	4660	1	8006
P26022	Pentraxin-related protein PTX3 OS=Homo sapiens OX=9606 GN=PTX3 PE=1 SV=3	sp|P26022|PTX3_HUMAN	2	9243	8770	2	6125	6130	2	13040	13000	2	9366	9370	2	5330	5330	2	11706	10000	2	11643	11600	2	13065	13100	2	10806	596	2	11907	11900	2	9942	5640	2	18158	18200	2	15129	11800	2	9100	9100	2	17819	17800	2	18420
P26038	Moesin OS=Homo sapiens OX=9606 GN=MSN PE=1 SV=3	sp|P26038|MOES_HUMAN	28	1822820	2790000	28	1397184	2160000	28	2988192	4640000	28	2299097	3780000	28	1588825	2660000	28	2299557	3730000	28	2192425	3610000	28	2360882	3820000	28	1880129	3020000	28	2433287	3980000	28	2229900	3630000	28	2004875	3250000	28	2190177	3530000	28	1908060	3080000	28	2183102	3560000	28	2536737
P26196	Probable ATP-dependent RNA helicase DDX6 OS=Homo sapiens OX=9606 GN=DDX6 PE=1 SV=2	sp|P26196|DDX6_HUMAN	13	235733	190000	13	213392	220000	13	500188	605000	13	346202	380000	13	165869	166000	13	382319	405000	13	190690	192000	13	375053	367000	13	266275	319000	13	272112	277000	13	273082	256000	13	219339	229000	13	264337	242000	13	231944	228000	13	217400	264000	13	381780
P26373	60S ribosomal protein L13 OS=Homo sapiens OX=9606 GN=RPL13 PE=1 SV=4	sp|P26373|RL13_HUMAN	2	261133	261000	2	235603	236000	2	425503	426000	2	264961	265000	2	140103	140000	2	345193	345000	2	187315	187000	2	282643	283000	2	268493	268000	2	295079	295000	2	235801	236000	2	295559	296000	2	231125	231000	2	176644	177000	2	233196	233000	2	350378
P26440	Isovaleryl-CoA dehydrogenase, mitochondrial OS=Homo sapiens OX=9606 GN=IVD PE=1 SV=1	sp|P26440|IVD_HUMAN	1	1157	1160	1	665	665	1	785	#N/A	1	1451	1450	1	665	665	1	1048	1050	1	775	775	1	831	831	1	609	609	1	1178	#N/A	1	569	569	1	393	393	1	554	554	1	1206	1210	1	609	#N/A	1	670
P26447	Protein S100-A4 OS=Homo sapiens OX=9606 GN=S100A4 PE=1 SV=1	sp|P26447|S10A4_HUMAN	7	1874302	2940000	7	770798	1230000	7	2659211	4160000	7	1491856	2300000	7	1095585	1700000	7	3770281	5800000	7	1053474	1640000	7	3056391	4710000	7	2014924	3180000	7	1995839	3080000	7	1346444	2160000	7	871241	1360000	7	1073753	1710000	7	893213	1460000	7	1688948	2670000	7	2517731
P26572	Alpha-1,3-mannosyl-glycoprotein 2-beta-N-acetylglucosaminyltransferase OS=Homo sapiens OX=9606 GN=MGAT1 PE=1 SV=2	sp|P26572|MGAT1_HUMAN	7	105682	75500	7	59460	59500	7	61770	61800	7	74859	66100	7	57133	53700	7	106096	106000	7	90532	89300	7	65563	65600	7	98806	97400	7	106814	104000	7	79461	79500	7	109270	109000	7	90282	90300	7	75422	73200	7	83252	83300	7	124223
P26583	High mobility group protein B2 OS=Homo sapiens OX=9606 GN=HMGB2 PE=1 SV=2	sp|P26583|HMGB2_HUMAN	4	44268	74800	4	58424	104000	4	136812	238000	4	74003	113000	4	33346	63900	4	140040	241000	4	50779	91600	4	95497	171000	4	70508	116000	4	44225	76200	4	66354	116000	4	73055	139000	4	54895	88600	4	41472	60700	4	43950	52300	4	106277
P26639	Threonine--tRNA ligase, cytoplasmic OS=Homo sapiens OX=9606 GN=TARS PE=1 SV=3	sp|P26639|SYTC_HUMAN	2	198445	397000	2	199940	400000	2	108330	217000	2	147853	296000	2	149749	300000	2	193304	387000	2	148637	297000	2	185390	371000	2	141944	284000	2	166925	334000	2	188159	376000	2	162953	326000	2	162477	325000	2	149880	300000	2	174166	348000	2	163632
P26640	Valine--tRNA ligase OS=Homo sapiens OX=9606 GN=VARS PE=1 SV=4	sp|P26640|SYVC_HUMAN	22	444425	575000	22	212880	232000	22	485501	540000	22	348374	463000	22	180538	232000	22	393710	481000	22	304985	423000	22	385131	492000	22	311677	394000	22	380410	495000	22	432062	574000	22	414551	449000	22	381222	479000	22	280005	354000	22	336658	459000	22	395457
P26885	Peptidyl-prolyl cis-trans isomerase FKBP2 OS=Homo sapiens OX=9606 GN=FKBP2 PE=1 SV=2	sp|P26885|FKBP2_HUMAN	2	215374	215000	2	95681	95700	2	209373	209000	2	117100	12500	2	80484	20000	2	146297	35500	2	154466	32400	2	201152	201000	2	121551	22400	2	144654	33500	2	177653	178000	2	35340	35300	2	155625	156000	2	190377	190000	2	173901	174000	2	155474
P27105	Erythrocyte band 7 integral membrane protein OS=Homo sapiens OX=9606 GN=STOM PE=1 SV=3	sp|P27105|STOM_HUMAN	2	37744	37700	2	18663	8450	2	54921	54900	2	14287	3320	2	5481	5480	2	26087	15000	2	21233	14600	2	40563	40600	2	16562	16600	2	21153	21200	2	45725	45700	2	27166	27200	2	51137	51100	2	28686	28700	2	30503	8000	2	23286
P27144	Adenylate kinase 4, mitochondrial OS=Homo sapiens OX=9606 GN=AK4 PE=1 SV=1	sp|P27144|KAD4_HUMAN	3	16676	14700	3	6575	11800	3	18604	17200	3	4201	4360	3	6809	12000	3	15989	21000	3	10108	13900	3	16868	12400	3	15710	2620	3	20022	5650	3	26147	3630	3	9186	17700	3	13843	16500	3	28709	50800	3	10250	17100	3	12208
P27348	14-3-3 protein theta OS=Homo sapiens OX=9606 GN=YWHAQ PE=1 SV=1	sp|P27348|1433T_HUMAN	10	253316	460000	10	135863	237000	10	416903	629000	10	290926	490000	10	159248	275000	10	308783	511000	10	267811	447000	10	303079	513000	10	254476	421000	10	300158	510000	10	280127	476000	10	302785	499000	10	273598	444000	10	281896	507000	10	257909	436000	10	378787
P27482	Calmodulin-like protein 3 OS=Homo sapiens OX=9606 GN=CALML3 PE=1 SV=2	sp|P27482|CALL3_HUMAN	1	13323	13300	1	2908	2910	1	22945	22900	1	2750	2750	1	2625	2620	1	8037	8040	1	1818	1820	1	1845	1850	1	3366	3370	1	6959	6960	1	3445	3440	1	3537	3540	1	3462	3460	1	3119	3120	1	2750	2750	1	3101
P27487	Dipeptidyl peptidase 4 OS=Homo sapiens OX=9606 GN=DPP4 PE=1 SV=2	sp|P27487|DPP4_HUMAN	1	10355	10400	1	16746	16700	1	16492	16500	1	38671	38700	1	29048	29000	1	46517	46500	1	40582	40600	1	50136	50100	1	46645	46600	1	54092	54100	1	45389	45400	1	49363	49400	1	46039	46000	1	28752	28800	1	34790	34800	1	61938
P27635	60S ribosomal protein L10 OS=Homo sapiens OX=9606 GN=RPL10 PE=1 SV=4	sp|P27635|RL10_HUMAN	6	343869	968000	6	324300	921000	6	353191	974000	6	379269	1080000	6	249833	681000	6	479080	1360000	6	327020	916000	6	485440	1400000	6	410023	1150000	6	387994	1090000	6	439716	1210000	6	433197	1200000	6	374039	1050000	6	379714	1070000	6	364774	1010000	6	492245
P27694	Replication protein A 70 kDa DNA-binding subunit OS=Homo sapiens OX=9606 GN=RPA1 PE=1 SV=2	sp|P27694|RFA1_HUMAN	8	74393	101000	8	59815	69500	8	127379	159000	8	55469	85100	8	33733	50400	8	86806	135000	8	58048	87900	8	93959	116000	8	50200	73800	8	70317	100000	8	90665	101000	8	49340	71800	8	84227	112000	8	86784	96600	8	86653	108000	8	92230
P27695	DNA-(apurinic or apyrimidinic site) lyase OS=Homo sapiens OX=9606 GN=APEX1 PE=1 SV=2	sp|P27695|APEX1_HUMAN	6	234412	287000	6	243194	292000	6	340217	417000	6	301815	387000	6	176759	232000	6	345174	412000	6	243437	302000	6	298292	349000	6	274788	322000	6	307902	364000	6	306057	362000	6	348041	416000	6	357128	421000	6	197989	243000	6	245867	295000	6	311679
P27707	Deoxycytidine kinase OS=Homo sapiens OX=9606 GN=DCK PE=1 SV=1	sp|P27707|DCK_HUMAN	5	78981	132000	5	18780	25500	5	47970	56200	5	51972	81000	5	59385	85500	5	66461	104000	5	35333	57100	5	59034	75400	5	43854	66100	5	51689	74800	5	30323	43200	5	77656	101000	5	35009	59500	5	41251	69500	5	37041	53400	5	46523
P27708	CAD protein OS=Homo sapiens OX=9606 GN=CAD PE=1 SV=3	sp|P27708|PYR1_HUMAN	24	296657	251000	24	227052	94100	24	504097	357000	24	231823	113000	24	774483	725000	24	233229	114000	24	174159	162000	24	302116	213000	24	194175	144000	24	194367	121000	24	281203	168000	24	199724	200000	24	240160	209000	24	224533	114000	24	226454	114000	24	289272
P27797	Calreticulin OS=Homo sapiens OX=9606 GN=CALR PE=1 SV=1	sp|P27797|CALR_HUMAN	27	2963317	6610000	27	1791665	3780000	27	4635424	9950000	27	3248280	6800000	27	2250028	4770000	27	4669912	9250000	27	3006877	6210000	27	4563002	9620000	27	3224997	6760000	27	4417884	8890000	27	3805638	8160000	27	3686401	7240000	27	4896561	9950000	27	4586739	9650000	27	3401788	7250000	27	4339707
P28066	Proteasome subunit alpha type-5 OS=Homo sapiens OX=9606 GN=PSMA5 PE=1 SV=3	sp|P28066|PSA5_HUMAN	3	281270	281000	3	208497	209000	3	413842	414000	3	280005	280000	3	177193	177000	3	347655	348000	3	266989	267000	3	355320	355000	3	267386	267000	3	297944	298000	3	269946	270000	3	351388	351000	3	344189	344000	3	294386	294000	3	324043	324000	3	366995
P28070	Proteasome subunit beta type-4 OS=Homo sapiens OX=9606 GN=PSMB4 PE=1 SV=4	sp|P28070|PSB4_HUMAN	14	348938	707000	14	316678	629000	14	498212	1070000	14	387851	772000	14	310781	616000	14	419451	847000	14	379172	749000	14	418969	818000	14	375524	739000	14	424089	836000	14	394916	769000	14	460211	908000	14	419163	808000	14	350668	669000	14	374463	771000	14	404323
P28072	Proteasome subunit beta type-6 OS=Homo sapiens OX=9606 GN=PSMB6 PE=1 SV=4	sp|P28072|PSB6_HUMAN	3	246288	246000	3	119100	119000	3	232499	233000	3	145124	145000	3	83857	83900	3	171057	171000	3	110995	111000	3	148192	148000	3	124551	125000	3	140105	140000	3	107773	108000	3	180090	180000	3	112904	113000	3	115754	116000	3	132900	133000	3	192078
P28161	Glutathione S-transferase Mu 2 OS=Homo sapiens OX=9606 GN=GSTM2 PE=1 SV=2	sp|P28161|GSTM2_HUMAN	1	9388	9390	1	7542	7540	1	6991	6990	1	4660	4660	1	8140	8140	1	14986	15000	1	1994	1990	1	8150	8150	1	3907	3910	1	11596	11600	1	7598	7600	1	7639	7640	1	5410	5410	1	6646	6650	1	4787	4790	1	7466
P28288	ATP-binding cassette sub-family D member 3 OS=Homo sapiens OX=9606 GN=ABCD3 PE=1 SV=1	sp|P28288|ABCD3_HUMAN	1	9590	#N/A	1	1100	1100	1	4557	#N/A	1	2150	2150	1	1857	1860	1	2162	#N/A	1	974	974	1	3570	3570	1	1481	1480	1	1736	1740	1	2000	2000	1	3009	3010	1	3086	#N/A	1	1476	1480	1	4226	#N/A	1	4248
P28300	Protein-lysine 6-oxidase OS=Homo sapiens OX=9606 GN=LOX PE=1 SV=2	sp|P28300|LYOX_HUMAN	9	104576	86300	9	38740	36400	9	85667	72200	9	64462	68600	9	42026	45300	9	54910	58700	9	33860	30300	9	62976	50800	9	47633	43300	9	59079	56700	9	91793	79400	9	102016	105000	9	137343	124000	9	88215	91000	9	30652	33100	9	53555
P28340	DNA polymerase delta catalytic subunit OS=Homo sapiens OX=9606 GN=POLD1 PE=1 SV=2	sp|P28340|DPOD1_HUMAN	5	39905	34100	5	45303	45300	5	40630	29200	5	34212	34200	5	29264	23800	5	36608	31300	5	46471	46500	5	45787	45800	5	31126	31100	5	49485	49500	5	23726	17700	5	18909	10600	5	18562	15700	5	32614	32600	5	34625	31300	5	46968
P28347	Transcriptional enhancer factor TEF-1 OS=Homo sapiens OX=9606 GN=TEAD1 PE=1 SV=2	sp|P28347|TEAD1_HUMAN	1	9208	9210	1	5445	#N/A	1	2160	2160	1	5815	5820	1	8514	8510	1	2829	#N/A	1	13275	13300	1	7193	#N/A	1	14818	14800	1	10752	10800	1	15988	16000	1	14889	14900	1	10129	10100	1	14148	14100	1	14932	14900	1	2224
P28482	Mitogen-activated protein kinase 1 OS=Homo sapiens OX=9606 GN=MAPK1 PE=1 SV=3	sp|P28482|MK01_HUMAN	1	12981	13000	1	1910	#N/A	1	13240	13200	1	4410	4410	1	1516	#N/A	1	11043	11000	1	3323	3320	1	7380	7380	1	3265	#N/A	1	3493	#N/A	1	7248	7250	1	4816	4820	1	9151	9150	1	5103	5100	1	6216	6220	1	5603
P29083	General transcription factor IIE subunit 1 OS=Homo sapiens OX=9606 GN=GTF2E1 PE=1 SV=2	sp|P29083|T2EA_HUMAN	3	13319	20400	3	4608	2720	3	19183	12600	3	8862	15700	3	1552	2020	3	4331	5410	3	5620	9670	3	3561	1240	3	2966	837	3	5282	6600	3	9879	3750	3	7355	12600	3	19330	22500	3	2920	2000	3	10429	5350	3	8719
P29084	Transcription initiation factor IIE subunit beta OS=Homo sapiens OX=9606 GN=GTF2E2 PE=1 SV=1	sp|P29084|T2EB_HUMAN	2	10433	10400	2	10244	10200	2	24289	24300	2	15836	15800	2	5274	5270	2	7634	7630	2	11582	11600	2	8858	8860	2	15255	15300	2	10870	10900	2	16776	16800	2	8469	8470	2	10233	10200	2	7153	7150	2	7994	7990	2	11534
P29144	Tripeptidyl-peptidase 2 OS=Homo sapiens OX=9606 GN=TPP2 PE=1 SV=4	sp|P29144|TPP2_HUMAN	20	312445	308000	20	196573	187000	20	332600	288000	20	225091	219000	20	190174	182000	20	284104	248000	20	261328	213000	20	286794	265000	20	259786	212000	20	294934	254000	20	304292	226000	20	262415	236000	20	291000	235000	20	168590	111000	20	288245	196000	20	337382
P29279	Connective tissue growth factor OS=Homo sapiens OX=9606 GN=CTGF PE=1 SV=2	sp|P29279|CTGF_HUMAN	2	38540	38500	2	31623	31600	2	46013	41300	2	16069	16100	2	6565	6560	2	16117	16100	2	31376	31400	2	28924	28900	2	26615	24100	2	6960	6960	2	6392	6390	2	12340	12300	2	60946	60900	2	39445	39400	2	20018	17700	2	29200
P29317	Ephrin type-A receptor 2 OS=Homo sapiens OX=9606 GN=EPHA2 PE=1 SV=2	sp|P29317|EPHA2_HUMAN	4	14727	8400	4	4448	3320	4	14563	14600	4	7370	5650	4	3045	3050	4	10959	11000	4	6402	3070	4	13472	13500	4	5553	3810	4	8544	8540	4	6710	5690	4	6035	3100	4	9814	9810	4	8999	9000	4	6547	6550	4	18342
P29373	Cellular retinoic acid-binding protein 2 OS=Homo sapiens OX=9606 GN=CRABP2 PE=1 SV=2	sp|P29373|RABP2_HUMAN	7	59548	104000	7	224231	350000	7	158294	238000	7	130018	189000	7	61013	86300	7	147288	195000	7	116700	192000	7	149637	213000	7	134287	176000	7	112608	172000	7	98336	131000	7	84765	107000	7	117047	169000	7	59500	96400	7	56295	76000	7	72712
P29692-3	Isoform 3 of Elongation factor 1-delta OS=Homo sapiens OX=9606 GN=EEF1D	sp|P29692-3|EF1D_HUMAN	1	1176	1180	1	788	788	1	1450	1450	1	1069	1070	1	1241	1240	1	443	443	1	342	342	1	443	443	1	521	521	1	1282	1280	1	436	436	1	776	776	1	332	332	1	997	997	1	443	443	1	1079
P29966	Myristoylated alanine-rich C-kinase substrate OS=Homo sapiens OX=9606 GN=MARCKS PE=1 SV=4	sp|P29966|MARCS_HUMAN	1	3443	3440	1	5059	5060	1	14046	14000	1	9477	9480	1	7231	7230	1	16372	16400	1	10787	10800	1	17633	17600	1	11257	11300	1	12594	12600	1	14965	15000	1	13655	13700	1	32161	32200	1	13660	13700	1	12499	12500	1	15043
P29992	Guanine nucleotide-binding protein subunit alpha-11 OS=Homo sapiens OX=9606 GN=GNA11 PE=1 SV=2	sp|P29992|GNA11_HUMAN	4	94057	94100	4	44174	44200	4	71421	71400	4	37213	37200	4	20073	20100	4	66900	60700	4	40064	17900	4	56846	56800	4	48752	24800	4	51943	48500	4	39096	38700	4	54185	21800	4	47542	47500	4	33569	30600	4	52856	48500	4	57555
P30040	Endoplasmic reticulum resident protein 29 OS=Homo sapiens OX=9606 GN=ERP29 PE=1 SV=4	sp|P30040|ERP29_HUMAN	7	789716	790000	7	371174	371000	7	804643	805000	7	508092	508000	7	412915	413000	7	695658	694000	7	508792	505000	7	685220	685000	7	505538	506000	7	749566	750000	7	743085	743000	7	663269	663000	7	661783	662000	7	599079	599000	7	555093	555000	7	724946
P30041	Peroxiredoxin-6 OS=Homo sapiens OX=9606 GN=PRDX6 PE=1 SV=3	sp|P30041|PRDX6_HUMAN	12	13950124	28000000	12	1646129	2950000	12	4720154	8580000	12	2802571	5000000	12	1565974	2770000	12	5534524	9940000	12	2171324	3910000	12	3190914	5680000	12	2542876	4570000	12	2473261	4500000	12	2431650	4480000	12	3179483	5670000	12	2015227	3600000	12	4815201	8700000	12	2256837	4060000	12	4352449
P30043	Flavin reductase (NADPH) OS=Homo sapiens OX=9606 GN=BLVRB PE=1 SV=3	sp|P30043|BLVRB_HUMAN	6	72202	96800	6	66534	104000	6	109287	170000	6	57128	90800	6	53432	63700	6	100865	146000	6	83894	136000	6	102694	163000	6	80620	102000	6	100895	137000	6	70654	110000	6	118354	156000	6	100256	153000	6	95443	146000	6	82712	119000	6	103831
P30046	D-dopachrome decarboxylase OS=Homo sapiens OX=9606 GN=DDT PE=1 SV=3	sp|P30046|DOPD_HUMAN	2	43015	654	2	17702	17700	2	34607	34600	2	20160	20200	2	4136	4140	2	13615	13600	2	8933	8930	2	25282	25300	2	21752	568	2	18775	532	2	17219	17200	2	24714	1330	2	21688	21700	2	18344	18300	2	20723	20700	2	15470
P30049	ATP synthase subunit delta, mitochondrial OS=Homo sapiens OX=9606 GN=ATP5F1D PE=1 SV=2	sp|P30049|ATPD_HUMAN	2	55443	55400	2	24962	25000	2	62113	62100	2	35635	35600	2	19343	19300	2	38026	38000	2	33601	33600	2	41777	41800	2	29210	29200	2	43844	43800	2	37179	37200	2	38848	38800	2	33669	33700	2	49553	49600	2	28279	28300	2	52991
P30050	60S ribosomal protein L12 OS=Homo sapiens OX=9606 GN=RPL12 PE=1 SV=1	sp|P30050|RL12_HUMAN	2	742543	743000	2	639974	640000	2	1031866	1030000	2	665969	666000	2	345276	345000	2	831286	831000	2	505944	506000	2	747818	748000	2	670089	670000	2	681361	681000	2	664606	665000	2	790854	791000	2	640462	640000	2	562160	562000	2	554488	554000	2	878989
P30084	Enoyl-CoA hydratase, mitochondrial OS=Homo sapiens OX=9606 GN=ECHS1 PE=1 SV=4	sp|P30084|ECHM_HUMAN	10	246694	358000	10	128460	181000	10	249138	327000	10	244015	373000	10	168983	264000	10	210838	294000	10	208482	308000	10	236378	329000	10	162700	231000	10	235342	365000	10	230541	346000	10	167117	240000	10	175451	244000	10	207349	298000	10	173328	246000	10	189800
P30085	UMP-CMP kinase OS=Homo sapiens OX=9606 GN=CMPK1 PE=1 SV=3	sp|P30085|KCY_HUMAN	3	28699	9150	3	37761	73000	3	65376	125000	3	91568	182000	3	157978	314000	3	180093	346000	3	161678	322000	3	265264	529000	3	173618	345000	3	14851	1440	3	21924	6400	3	239308	477000	3	24436	1100	3	23513	1550	3	7961	1120	3	9624
P30086	Phosphatidylethanolamine-binding protein 1 OS=Homo sapiens OX=9606 GN=PEBP1 PE=1 SV=3	sp|P30086|PEBP1_HUMAN	12	493502	748000	12	203002	299000	12	390347	605000	12	381296	638000	12	301674	523000	12	471185	791000	12	420778	691000	12	405152	613000	12	396192	650000	12	437221	726000	12	432303	652000	12	568287	955000	12	500906	801000	12	359454	556000	12	292604	480000	12	462631
P30101	Protein disulfide-isomerase A3 OS=Homo sapiens OX=9606 GN=PDIA3 PE=1 SV=4	sp|P30101|PDIA3_HUMAN	21	5456546	9010000	21	2979595	4840000	21	5741326	9050000	21	3886827	6230000	21	3279772	5360000	21	5746760	9380000	21	4286766	6930000	21	5751265	9290000	21	4242795	6900000	21	6271026	10200000	21	5260735	8490000	21	5065260	8200000	21	6325542	10300000	21	5439775	8850000	21	4621497	7520000	21	5528267
P30153	Serine/threonine-protein phosphatase 2A 65 kDa regulatory subunit A alpha isoform OS=Homo sapiens OX=9606 GN=PPP2R1A PE=1 SV=4	sp|P30153|2AAA_HUMAN	22	805124	956000	22	530642	622000	22	851904	1050000	22	569965	737000	22	363998	458000	22	703044	855000	22	464604	560000	22	598164	756000	22	555226	684000	22	579656	740000	22	603533	750000	22	609047	732000	22	512159	677000	22	492604	630000	22	537493	664000	22	727364
P30405	Peptidyl-prolyl cis-trans isomerase F, mitochondrial OS=Homo sapiens OX=9606 GN=PPIF PE=1 SV=1	sp|P30405|PPIF_HUMAN	2	12908	9290	2	16152	16200	2	27754	27800	2	14270	14300	2	11117	11100	2	22871	9180	2	18300	18300	2	22967	23000	2	7638	7640	2	8763	8760	2	16140	14500	2	23647	#N/A	2	12220	12200	2	11567	10000	2	13217	13200	2	18679
P30414	NK-tumor recognition protein OS=Homo sapiens OX=9606 GN=NKTR PE=1 SV=2	sp|P30414|NKTR_HUMAN	1	20130	20100	1	7071	7070	1	14491	14500	1	7625	7620	1	6073	6070	1	22141	#N/A	1	7960	7960	1	15367	#N/A	1	8805	#N/A	1	4813	4810	1	11739	11700	1	8124	8120	1	12578	#N/A	1	8922	8920	1	8380	8380	1	10965
P30520	Adenylosuccinate synthetase isozyme 2 OS=Homo sapiens OX=9606 GN=ADSS PE=1 SV=3	sp|P30520|PURA2_HUMAN	10	603887	859000	10	395251	581000	10	741894	1140000	10	421126	664000	10	261704	404000	10	345783	607000	10	318470	473000	10	441273	649000	10	380445	591000	10	359551	577000	10	410672	612000	10	441238	718000	10	309296	546000	10	432511	636000	10	371591	552000	10	582243
P30533	Alpha-2-macroglobulin receptor-associated protein OS=Homo sapiens OX=9606 GN=LRPAP1 PE=1 SV=1	sp|P30533|AMRP_HUMAN	6	64797	77300	6	38258	45600	6	69709	74100	6	50292	61100	6	31818	34600	6	50907	37600	6	37426	34000	6	50664	37100	6	47212	52900	6	38336	40500	6	53153	67700	6	61427	34700	6	36564	42400	6	41590	45900	6	45365	36500	6	76988
P30536	Translocator protein OS=Homo sapiens OX=9606 GN=TSPO PE=1 SV=3	sp|P30536|TSPO_HUMAN	4	184974	351000	4	133904	260000	4	286211	543000	4	204000	390000	4	173032	333000	4	250892	462000	4	243673	466000	4	334325	627000	4	200403	384000	4	322463	614000	4	348746	675000	4	252927	490000	4	189495	350000	4	266099	515000	4	263404	503000	4	241103
P30566	Adenylosuccinate lyase OS=Homo sapiens OX=9606 GN=ADSL PE=1 SV=2	sp|P30566|PUR8_HUMAN	3	70396	134000	3	34576	68300	3	61221	116000	3	78087	149000	3	49118	97800	3	53883	100000	3	73352	146000	3	61569	116000	3	43509	83200	3	41765	80800	3	63902	121000	3	45586	90800	3	38116	74200	3	49807	92700	3	55396	101000	3	60625
P30740	Leukocyte elastase inhibitor OS=Homo sapiens OX=9606 GN=SERPINB1 PE=1 SV=1	sp|P30740|ILEU_HUMAN	4	22109	28500	4	23485	26500	4	17415	7820	4	16364	20000	4	17484	18900	4	23367	25700	4	12998	19900	4	17363	14200	4	19045	25400	4	33237	31200	4	24654	23500	4	33323	42200	4	25691	36100	4	20755	28300	4	20806	18000	4	19937
P30825	High affinity cationic amino acid transporter 1 OS=Homo sapiens OX=9606 GN=SLC7A1 PE=1 SV=1	sp|P30825|CTR1_HUMAN	6	343934	344000	6	147701	66300	6	427864	222000	6	229378	146000	6	145306	144000	6	146213	146000	6	202669	201000	6	314108	188000	6	222966	223000	6	193765	192000	6	288612	143000	6	213451	213000	6	244687	133000	6	248355	99700	6	253179	123000	6	255386
P30837	Aldehyde dehydrogenase X, mitochondrial OS=Homo sapiens OX=9606 GN=ALDH1B1 PE=1 SV=3	sp|P30837|AL1B1_HUMAN	12	348477	324000	12	156790	165000	12	258735	308000	12	165192	210000	12	153900	158000	12	156223	157000	12	279778	280000	12	182752	230000	12	188315	183000	12	199812	240000	12	265823	318000	12	185616	208000	12	265422	310000	12	410748	482000	12	216659	259000	12	228217
P30876	DNA-directed RNA polymerase II subunit RPB2 OS=Homo sapiens OX=9606 GN=POLR2B PE=1 SV=1	sp|P30876|RPB2_HUMAN	15	143577	129000	15	143479	146000	15	176212	175000	15	94277	100000	15	71304	73400	15	177905	178000	15	109914	111000	15	145010	171000	15	130975	141000	15	170026	174000	15	132383	140000	15	124663	115000	15	193141	258000	15	102337	92200	15	106250	123000	15	145274
P31040	Succinate dehydrogenase [ubiquinone] flavoprotein subunit, mitochondrial OS=Homo sapiens OX=9606 GN=SDHA PE=1 SV=2	sp|P31040|SDHA_HUMAN	1	30849	30800	1	3545	3550	1	2689	2690	1	6501	6500	1	3314	#N/A	1	2832	2830	1	3551	#N/A	1	7368	#N/A	1	5244	#N/A	1	1525	1530	1	10336	10300	1	6644	6640	1	4439	4440	1	2257	2260	1	8346	#N/A	1	9159
P31150	Rab GDP dissociation inhibitor alpha OS=Homo sapiens OX=9606 GN=GDI1 PE=1 SV=2	sp|P31150|GDIA_HUMAN	10	549639	982000	10	253824	272000	10	529054	524000	10	296007	299000	10	164884	242000	10	308676	417000	10	205115	316000	10	325134	288000	10	210558	321000	10	296220	414000	10	309399	286000	10	276616	432000	10	441519	428000	10	362478	366000	10	394660	394000	10	358434
P31153	S-adenosylmethionine synthase isoform type-2 OS=Homo sapiens OX=9606 GN=MAT2A PE=1 SV=1	sp|P31153|METK2_HUMAN	2	169932	170000	2	226902	227000	2	316769	317000	2	190664	191000	2	130675	131000	2	232803	233000	2	121341	121000	2	209474	209000	2	147725	148000	2	158869	151000	2	193251	193000	2	207503	178000	2	138759	139000	2	130416	130000	2	81622	81600	2	192580
P31321	cAMP-dependent protein kinase type I-beta regulatory subunit OS=Homo sapiens OX=9606 GN=PRKAR1B PE=1 SV=4	sp|P31321|KAP1_HUMAN	1	24644	24600	1	23197	23200	1	41555	41600	1	31093	31100	1	16465	16500	1	22626	22600	1	15183	15200	1	26041	26000	1	27863	27900	1	30988	31000	1	29848	29800	1	38191	38200	1	29197	29200	1	25711	25700	1	22677	22700	1	28463
P31323	cAMP-dependent protein kinase type II-beta regulatory subunit OS=Homo sapiens OX=9606 GN=PRKAR2B PE=1 SV=3	sp|P31323|KAP3_HUMAN	2	15695	15700	2	9509	9510	2	15423	15400	2	17981	18000	2	9575	9580	2	14451	14500	2	17448	17400	2	8847	8850	2	14902	4940	2	13051	13100	2	13529	13500	2	9578	9580	2	11780	11800	2	10078	10100	2	12353	12400	2	18417
P31689	DnaJ homolog subfamily A member 1 OS=Homo sapiens OX=9606 GN=DNAJA1 PE=1 SV=2	sp|P31689|DNJA1_HUMAN	1	20583	20600	1	18435	18400	1	29951	30000	1	12581	12600	1	15862	15900	1	24407	24400	1	18534	18500	1	16911	16900	1	31003	31000	1	19301	19300	1	18255	18300	1	25865	25900	1	26232	26200	1	18792	18800	1	14792	14800	1	6381
P31749	RAC-alpha serine/threonine-protein kinase OS=Homo sapiens OX=9606 GN=AKT1 PE=1 SV=2	sp|P31749|AKT1_HUMAN	2	8970	6440	2	12995	13000	2	9555	9560	2	5920	4240	2	7180	1400	2	11713	7370	2	6461	6460	2	12915	12900	2	9503	3110	2	5694	2890	2	9328	9330	2	11993	5380	2	9396	9400	2	11702	11700	2	5925	5930	2	11804
P31930	Cytochrome b-c1 complex subunit 1, mitochondrial OS=Homo sapiens OX=9606 GN=UQCRC1 PE=1 SV=3	sp|P31930|QCR1_HUMAN	15	287978	387000	15	296427	394000	15	658056	778000	15	428837	539000	15	182369	206000	15	504171	646000	15	281205	356000	15	415049	547000	15	392994	308000	15	409825	401000	15	432673	572000	15	401383	400000	15	333669	393000	15	402591	465000	15	357635	470000	15	547406
P31937	3-hydroxyisobutyrate dehydrogenase, mitochondrial OS=Homo sapiens OX=9606 GN=HIBADH PE=1 SV=2	sp|P31937|3HIDH_HUMAN	6	303276	303000	6	62499	25200	6	182160	59900	6	35558	35600	6	25728	23200	6	54938	52800	6	31017	26400	6	53520	53500	6	40713	40700	6	51214	51200	6	180962	112000	6	37266	16000	6	27353	23700	6	41013	41000	6	82277	31300	6	52808
P31939	Bifunctional purine biosynthesis protein PURH OS=Homo sapiens OX=9606 GN=ATIC PE=1 SV=3	sp|P31939|PUR9_HUMAN	1	18188	#N/A	1	3616	#N/A	1	16103	#N/A	1	7570	#N/A	1	4385	4390	1	11374	11400	1	12176	12200	1	10138	10100	1	12566	12600	1	18556	18600	1	8947	#N/A	1	18113	#N/A	1	10364	#N/A	1	11285	11300	1	13947	#N/A	1	9397
P31943	Heterogeneous nuclear ribonucleoprotein H OS=Homo sapiens OX=9606 GN=HNRNPH1 PE=1 SV=4	sp|P31943|HNRH1_HUMAN	10	798016	1140000	10	568206	711000	10	1271006	1720000	10	779257	1050000	10	439318	642000	10	999276	1330000	10	648329	932000	10	879176	1240000	10	686765	959000	10	751908	1070000	10	686317	1030000	10	854255	1180000	10	802538	1140000	10	754984	1160000	10	549756	823000	10	924888
P31944	Caspase-14 OS=Homo sapiens OX=9606 GN=CASP14 PE=1 SV=2	sp|P31944|CASPE_HUMAN	2	17245	17200	2	10006	10000	2	47874	47900	2	4717	4720	2	3614	3610	2	8632	8630	2	9732	9730	2	11047	11000	2	9864	9860	2	12533	12500	2	10158	10200	2	10909	10900	2	7040	7040	2	9055	9060	2	15905	15900	2	11601
P31949	Protein S100-A11 OS=Homo sapiens OX=9606 GN=S100A11 PE=1 SV=2	sp|P31949|S10AB_HUMAN	7	391572	664000	7	444199	774000	7	745692	1250000	7	1014365	1860000	7	834670	1550000	7	981313	1790000	7	941197	1710000	7	1084930	1930000	7	672697	1210000	7	944942	1760000	7	930955	1770000	7	835814	1510000	7	1029643	1910000	7	828480	1540000	7	782491	1420000	7	1037692
P32119	Peroxiredoxin-2 OS=Homo sapiens OX=9606 GN=PRDX2 PE=1 SV=5	sp|P32119|PRDX2_HUMAN	4	205385	205000	4	115655	116000	4	147068	147000	4	149120	149000	4	107559	90700	4	167772	168000	4	131527	132000	4	129286	122000	4	113245	113000	4	173916	146000	4	154279	154000	4	136643	137000	4	142549	143000	4	150661	151000	4	124387	124000	4	112754
P32320	Cytidine deaminase OS=Homo sapiens OX=9606 GN=CDA PE=1 SV=2	sp|P32320|CDD_HUMAN	3	92510	178000	3	15753	28300	3	69556	127000	3	36342	68100	3	42259	82200	3	31734	60400	3	72221	134000	3	79929	148000	3	68766	126000	3	92485	171000	3	73956	142000	3	39844	78100	3	35349	66800	3	54395	100000	3	56503	105000	3	71543
P32455	Guanylate-binding protein 1 OS=Homo sapiens OX=9606 GN=GBP1 PE=1 SV=2	sp|P32455|GBP1_HUMAN	7	46296	46300	7	34361	24200	7	40565	40600	7	24277	24300	7	23856	20900	7	31036	31000	7	30174	30200	7	35774	32000	7	29753	29800	7	43415	43400	7	34561	34600	7	36410	36400	7	30759	30800	7	27338	27100	7	29843	28400	7	24922
P32456	Guanylate-binding protein 2 OS=Homo sapiens OX=9606 GN=GBP2 PE=1 SV=3	sp|P32456|GBP2_HUMAN	1	27157	27200	1	10536	10500	1	11419	11400	1	13427	13400	1	16926	16900	1	6573	6570	1	20381	20400	1	6631	6630	1	12856	12900	1	5173	5170	1	10919	10900	1	36760	36800	1	7162	7160	1	27987	28000	1	4045	#N/A	1	7761
P32969	60S ribosomal protein L9 OS=Homo sapiens OX=9606 GN=RPL9 PE=1 SV=1	sp|P32969|RL9_HUMAN	10	581520	1250000	10	678488	1340000	10	1248299	2500000	10	848704	1690000	10	518698	1040000	10	1134407	2270000	10	698193	1380000	10	1024796	2110000	10	868248	1770000	10	952535	1990000	10	913290	1860000	10	904017	1790000	10	894517	1730000	10	824955	1700000	10	828095	1730000	10	1058136
P33176	Kinesin-1 heavy chain OS=Homo sapiens OX=9606 GN=KIF5B PE=1 SV=1	sp|P33176|KINH_HUMAN	24	593501	802000	24	373387	506000	24	810081	1090000	24	574498	801000	24	347292	504000	24	670516	858000	24	419353	577000	24	562022	753000	24	526145	737000	24	549077	772000	24	512100	706000	24	598059	857000	24	475491	638000	24	455921	562000	24	473924	654000	24	639514
P33897	ATP-binding cassette sub-family D member 1 OS=Homo sapiens OX=9606 GN=ABCD1 PE=1 SV=2	sp|P33897|ABCD1_HUMAN	4	40803	40000	4	15464	15500	4	18105	18100	4	21535	21500	4	12695	3820	4	27001	5650	4	17706	17700	4	16995	17000	4	17009	15800	4	19293	6890	4	20762	19200	4	20040	5090	4	29668	29700	4	34547	34500	4	18413	18400	4	23922
P33991	DNA replication licensing factor MCM4 OS=Homo sapiens OX=9606 GN=MCM4 PE=1 SV=5	sp|P33991|MCM4_HUMAN	16	294354	344000	16	229868	297000	16	414752	540000	16	251952	306000	16	182206	252000	16	294131	407000	16	155478	211000	16	205249	267000	16	265528	343000	16	258918	373000	16	219602	269000	16	256232	345000	16	223369	279000	16	143728	162000	16	209638	278000	16	305628
P33992	DNA replication licensing factor MCM5 OS=Homo sapiens OX=9606 GN=MCM5 PE=1 SV=5	sp|P33992|MCM5_HUMAN	10	513754	500000	10	195090	167000	10	528582	415000	10	271825	224000	10	135152	128000	10	267589	253000	10	272018	260000	10	198940	199000	10	331685	312000	10	199494	184000	10	183016	141000	10	392983	347000	10	194302	194000	10	138087	138000	10	320255	290000	10	323684
P34932	Heat shock 70 kDa protein 4 OS=Homo sapiens OX=9606 GN=HSPA4 PE=1 SV=4	sp|P34932|HSP74_HUMAN	18	800488	1200000	18	494282	420000	18	723339	927000	18	566436	703000	18	372225	373000	18	585914	783000	18	482635	380000	18	613756	761000	18	496048	423000	18	510529	468000	18	583364	790000	18	563229	721000	18	544570	720000	18	516293	701000	18	495232	683000	18	630255
P35052	Glypican-1 OS=Homo sapiens OX=9606 GN=GPC1 PE=1 SV=2	sp|P35052|GPC1_HUMAN	1	11384	11400	1	4700	#N/A	1	5357	#N/A	1	13437	#N/A	1	7681	#N/A	1	15459	#N/A	1	7810	7810	1	18349	18300	1	9405	9400	1	22612	#N/A	1	15256	15300	1	9419	9420	1	7908	7910	1	15224	15200	1	12626	12600	1	15589
P35080	Profilin-2 OS=Homo sapiens OX=9606 GN=PFN2 PE=1 SV=3	sp|P35080|PROF2_HUMAN	1	90263	90300	1	44372	#N/A	1	51095	51100	1	38588	#N/A	1	25746	25700	1	54463	#N/A	1	23172	#N/A	1	44418	44400	1	24499	#N/A	1	12933	#N/A	1	22952	23000	1	35217	#N/A	1	43017	43000	1	60528	60500	1	29324	29300	1	24209
P35080-2	Isoform IIb of Profilin-2 OS=Homo sapiens OX=9606 GN=PFN2	sp|P35080-2|PROF2_HUMAN	3	494971	495000	3	250441	250000	3	305309	305000	3	228715	229000	3	122332	122000	3	381656	382000	3	211144	211000	3	298256	295000	3	213194	213000	3	193308	193000	3	241027	241000	3	410962	411000	3	294173	294000	3	315766	316000	3	318502	319000	3	253421
P35222	Catenin beta-1 OS=Homo sapiens OX=9606 GN=CTNNB1 PE=1 SV=1	sp|P35222|CTNB1_HUMAN	16	473331	547000	16	238839	287000	16	430752	542000	16	280244	342000	16	198943	251000	16	349144	352000	16	318799	379000	16	408406	502000	16	305970	372000	16	355247	438000	16	398841	509000	16	391181	462000	16	327332	405000	16	346177	408000	16	313515	376000	16	319207
P35232	Prohibitin OS=Homo sapiens OX=9606 GN=PHB PE=1 SV=1	sp|P35232|PHB_HUMAN	7	404656	564000	7	275039	382000	7	537537	825000	7	411525	644000	7	271692	434000	7	384699	555000	7	313305	476000	7	429132	651000	7	365157	553000	7	354365	515000	7	459811	667000	7	389904	565000	7	395789	599000	7	378935	595000	7	364379	541000	7	396200
P35237	Serpin B6 OS=Homo sapiens OX=9606 GN=SERPINB6 PE=1 SV=3	sp|P35237|SPB6_HUMAN	16	204459	233000	16	191551	219000	16	290453	263000	16	222476	234000	16	211447	241000	16	492505	564000	16	255407	291000	16	590643	493000	16	310174	332000	16	344119	378000	16	419095	346000	16	364922	407000	16	308402	263000	16	248087	236000	16	424590	372000	16	349029
P35244	Replication protein A 14 kDa subunit OS=Homo sapiens OX=9606 GN=RPA3 PE=1 SV=1	sp|P35244|RFA3_HUMAN	4	83259	83300	4	51889	39100	4	127497	128000	4	80426	67200	4	36082	36100	4	99954	88200	4	55310	47400	4	108987	109000	4	64167	64200	4	76114	72400	4	84456	84500	4	97103	97100	4	61679	61700	4	39990	40000	4	88038	88000	4	110833
P35268	60S ribosomal protein L22 OS=Homo sapiens OX=9606 GN=RPL22 PE=1 SV=2	sp|P35268|RL22_HUMAN	7	1063750	1370000	7	757741	966000	7	1345663	1750000	7	1102080	1560000	7	660623	959000	7	1153709	1550000	7	882593	1280000	7	1007601	1360000	7	908522	1210000	7	1047146	1460000	7	996796	1400000	7	1037499	1360000	7	905579	1210000	7	765488	1040000	7	863741	1190000	7	1156809
P35269	General transcription factor IIF subunit 1 OS=Homo sapiens OX=9606 GN=GTF2F1 PE=1 SV=2	sp|P35269|T2FA_HUMAN	5	37998	47100	5	33995	41000	5	65613	81300	5	32098	42000	5	28282	30400	5	54725	34700	5	27376	13400	5	47697	59800	5	36507	27100	5	49891	40100	5	44448	65900	5	23968	31600	5	40558	49200	5	38203	50100	5	52124	65700	5	47744
P35270	Sepiapterin reductase OS=Homo sapiens OX=9606 GN=SPR PE=1 SV=1	sp|P35270|SPRE_HUMAN	2	17265	17300	2	14326	14300	2	20206	20200	2	14487	14500	2	10992	11000	2	17712	17700	2	12012	12000	2	16164	16200	2	13063	13100	2	30594	30600	2	13111	13100	2	15769	15800	2	10476	10500	2	7983	7980	2	11154	11200	2	18554
P35354	Prostaglandin G/H synthase 2 OS=Homo sapiens OX=9606 GN=PTGS2 PE=1 SV=2	sp|P35354|PGH2_HUMAN	1	9381	9380	1	2018	2020	1	24344	24300	1	8543	#N/A	1	3291	3290	1	2532	2530	1	8685	8690	1	5958	5960	1	3094	#N/A	1	1993	1990	1	2582	2580	1	3649	3650	1	5093	#N/A	1	4061	4060	1	1766	1770	1	4436
P35442	Thrombospondin-2 OS=Homo sapiens OX=9606 GN=THBS2 PE=1 SV=2	sp|P35442|TSP2_HUMAN	4	81392	81400	4	96630	90800	4	112212	112000	4	69569	69600	4	71189	71200	4	97707	97700	4	56228	56200	4	56046	52100	4	35914	30200	4	92982	93000	4	87993	88000	4	77645	30500	4	77578	77600	4	71710	71700	4	72239	72200	4	53851
P35475	Alpha-L-iduronidase OS=Homo sapiens OX=9606 GN=IDUA PE=1 SV=2	sp|P35475|IDUA_HUMAN	1	6450	6450	1	3073	3070	1	4285	4290	1	4811	4810	1	8613	8610	1	5352	5350	1	3513	3510	1	5356	5360	1	8401	8400	1	7906	7910	1	5193	5190	1	5091	5090	1	2487	2490	1	14197	14200	1	3091	3090	1	3411
P35527	Keratin, type I cytoskeletal 9 OS=Homo sapiens OX=9606 GN=KRT9 PE=1 SV=3	sp|P35527|K1C9_HUMAN	19	736692	756000	19	177342	208000	19	12696239	11800000	19	254694	272000	19	164603	182000	19	421204	389000	19	231847	236000	19	501599	544000	19	276144	290000	19	171340	225000	19	323647	352000	19	240420	252000	19	147501	194000	19	531925	471000	19	159153	177000	19	234248
P35555	Fibrillin-1 OS=Homo sapiens OX=9606 GN=FBN1 PE=1 SV=3	sp|P35555|FBN1_HUMAN	25	261154	279000	25	84822	77900	25	269772	218000	25	160453	112000	25	79689	70600	25	172730	190000	25	113118	88800	25	131039	127000	25	112948	75100	25	168121	130000	25	135325	126000	25	156963	94800	25	232297	217000	25	218381	195000	25	180095	128000	25	160414
P35556	Fibrillin-2 OS=Homo sapiens OX=9606 GN=FBN2 PE=1 SV=3	sp|P35556|FBN2_HUMAN	1	11621	11600	1	9048	9050	1	7104	7100	1	3103	3100	1	1445	1440	1	7059	7060	1	5024	5020	1	3447	3450	1	2890	#N/A	1	7368	7370	1	7580	#N/A	1	6625	6630	1	10717	10700	1	6013	#N/A	1	4848	#N/A	1	4519
P35573	Glycogen debranching enzyme OS=Homo sapiens OX=9606 GN=AGL PE=1 SV=3	sp|P35573|GDE_HUMAN	1	18216	#N/A	1	27079	27100	1	4850	#N/A	1	8505	#N/A	1	15801	15800	1	13294	13300	1	13600	13600	1	16515	#N/A	1	4343	4340	1	7277	#N/A	1	15277	#N/A	1	17719	#N/A	1	10306	#N/A	1	10830	#N/A	1	9758	#N/A	1	9262
P35579	Myosin-9 OS=Homo sapiens OX=9606 GN=MYH9 PE=1 SV=4	sp|P35579|MYH9_HUMAN	28	4453469	8710000	28	1861533	3630000	28	4402982	8590000	28	2910319	5770000	28	2163935	4330000	28	3179729	6200000	28	2866026	5670000	28	2983864	5780000	28	2354178	4590000	28	2619325	5110000	28	2677140	5220000	28	2558972	4990000	28	3331119	6490000	28	3928263	7690000	28	2877240	5620000	28	3838937
P35579-2	Isoform 2 of Myosin-9 OS=Homo sapiens OX=9606 GN=MYH9	sp|P35579-2|MYH9_HUMAN	1	1808599	1810000	1	741962	742000	1	1476231	1480000	1	846795	847000	1	643781	644000	1	1144037	1140000	1	866977	867000	1	1085302	1090000	1	781615	782000	1	888850	889000	1	948802	949000	1	845139	845000	1	1021325	1020000	1	1325579	1330000	1	954050	954000	1	1270780
P35606	Coatomer subunit beta' OS=Homo sapiens OX=9606 GN=COPB2 PE=1 SV=2	sp|P35606|COPB2_HUMAN	1	14040	14000	1	15267	15300	1	32609	32600	1	20944	20900	1	15216	15200	1	5966	5970	1	10613	10600	1	11596	11600	1	9254	9250	1	12376	12400	1	10637	10600	1	12837	12800	1	10451	10500	1	7953	7950	1	19385	19400	1	5655
P35610	Sterol O-acyltransferase 1 OS=Homo sapiens OX=9606 GN=SOAT1 PE=1 SV=3	sp|P35610|SOAT1_HUMAN	1	3480	#N/A	1	14478	14500	1	6927	6930	1	4852	#N/A	1	3970	3970	1	9974	9970	1	3096	#N/A	1	5594	5590	1	2746	2750	1	7241	7240	1	10978	11000	1	8838	8840	1	3770	3770	1	5314	5310	1	7589	7590	1	3454
P35625	Metalloproteinase inhibitor 3 OS=Homo sapiens OX=9606 GN=TIMP3 PE=1 SV=2	sp|P35625|TIMP3_HUMAN	2	23523	23500	2	9912	3740	2	12220	12200	2	10696	4340	2	11438	11400	2	31621	31600	2	43759	43800	2	41385	41400	2	50644	50600	2	6556	6560	2	44207	42800	2	63166	63200	2	12136	12100	2	67601	67600	2	37404	37400	2	13548
P35659	Protein DEK OS=Homo sapiens OX=9606 GN=DEK PE=1 SV=1	sp|P35659|DEK_HUMAN	2	22965	#N/A	2	7910	6280	2	21598	#N/A	2	7437	5210	2	9675	9680	2	13835	11900	2	5105	5100	2	15378	7080	2	6653	5290	2	8023	8020	2	8573	3630	2	7493	7490	2	8493	3330	2	7258	5460	2	5182	1550	2	15083
P35754	Glutaredoxin-1 OS=Homo sapiens OX=9606 GN=GLRX PE=1 SV=2	sp|P35754|GLRX1_HUMAN	4	41526	62600	4	96557	121000	4	97660	134000	4	55537	70600	4	70952	92200	4	76266	106000	4	139725	180000	4	88402	120000	4	91982	113000	4	193618	248000	4	188398	239000	4	145489	183000	4	82538	123000	4	94494	124000	4	117309	154000	4	65705
P35908	Keratin, type II cytoskeletal 2 epidermal OS=Homo sapiens OX=9606 GN=KRT2 PE=1 SV=2	sp|P35908|K22E_HUMAN	4	49056	34700	4	47111	47000	4	187237	187000	4	45506	45500	4	36927	27600	4	24576	17600	4	54819	42300	4	74864	69300	4	43311	43300	4	91100	91100	4	74640	74600	4	91412	91400	4	108180	108000	4	66508	64300	4	56044	56000	4	43353
P35914	Hydroxymethylglutaryl-CoA lyase, mitochondrial OS=Homo sapiens OX=9606 GN=HMGCL PE=1 SV=2	sp|P35914|HMGCL_HUMAN	2	14371	14400	2	4786	4790	2	25300	25300	2	17743	17700	2	9715	9710	2	5686	5690	2	12725	12700	2	8047	#N/A	2	17306	12600	2	14232	14200	2	12568	12600	2	15275	15300	2	10619	8820	2	8162	8160	2	12396	12400	2	12585
P35998	26S proteasome regulatory subunit 7 OS=Homo sapiens OX=9606 GN=PSMC2 PE=1 SV=3	sp|P35998|PRS7_HUMAN	5	284915	462000	5	179117	268000	5	372245	538000	5	217511	311000	5	141388	202000	5	280144	396000	5	195304	273000	5	238335	354000	5	188287	279000	5	233694	354000	5	250757	365000	5	298137	434000	5	266482	368000	5	218606	328000	5	230889	342000	5	283258
P36021	Monocarboxylate transporter 8 OS=Homo sapiens OX=9606 GN=SLC16A2 PE=1 SV=2	sp|P36021|MOT8_HUMAN	1	9981	9980	1	4661	4660	1	11942	11900	1	6957	6960	1	5160	5160	1	10492	10500	1	8358	8360	1	4112	4110	1	3009	3010	1	6414	6410	1	3656	3660	1	6264	6260	1	6215	6220	1	5046	5050	1	3152	3150	1	4950
P36404	ADP-ribosylation factor-like protein 2 OS=Homo sapiens OX=9606 GN=ARL2 PE=1 SV=4	sp|P36404|ARL2_HUMAN	2	35286	35300	2	21719	21700	2	48862	48900	2	35261	35300	2	17335	3520	2	41101	41100	2	27199	27200	2	35859	30100	2	36630	1970	2	29764	4920	2	47920	41100	2	35129	3670	2	28179	28200	2	19624	19600	2	44540	44500	2	32188
P36405	ADP-ribosylation factor-like protein 3 OS=Homo sapiens OX=9606 GN=ARL3 PE=1 SV=2	sp|P36405|ARL3_HUMAN	5	183217	183000	5	138511	127000	5	183302	183000	5	181943	157000	5	123962	124000	5	281184	276000	5	139919	128000	5	221928	193000	5	173428	169000	5	137202	137000	5	158946	144000	5	150999	147000	5	197716	162000	5	123730	106000	5	174638	151000	5	210815
P36507	Dual specificity mitogen-activated protein kinase kinase 2 OS=Homo sapiens OX=9606 GN=MAP2K2 PE=1 SV=1	sp|P36507|MP2K2_HUMAN	4	33701	32100	4	12923	12300	4	30895	30900	4	24843	24800	4	23484	21900	4	13148	11900	4	20752	20800	4	26194	22000	4	22286	22300	4	21373	21400	4	25004	24200	4	22967	20500	4	22194	22200	4	32113	32100	4	26050	26100	4	32275
P36542	ATP synthase subunit gamma, mitochondrial OS=Homo sapiens OX=9606 GN=ATP5F1C PE=1 SV=1	sp|P36542|ATPG_HUMAN	1	9157	9160	1	13090	13100	1	5636	5640	1	11242	11200	1	12074	12100	1	6362	6360	1	2635	2630	1	6134	6130	1	4702	4700	1	1621	1620	1	12726	12700	1	4831	4830	1	5865	5860	1	2931	2930	1	3097	3100	1	5379
P36551	Oxygen-dependent coproporphyrinogen-III oxidase, mitochondrial OS=Homo sapiens OX=9606 GN=CPOX PE=1 SV=3	sp|P36551|HEM6_HUMAN	5	103007	103000	5	43738	43700	5	105269	105000	5	61585	40200	5	40654	12900	5	73209	17900	5	62498	39400	5	114502	99000	5	60835	49000	5	50591	40000	5	84299	84300	5	62787	33700	5	61404	61400	5	61765	61800	5	53053	45500	5	64425
P36578	60S ribosomal protein L4 OS=Homo sapiens OX=9606 GN=RPL4 PE=1 SV=5	sp|P36578|RL4_HUMAN	16	1042193	1480000	16	1238615	1620000	16	2076661	2700000	16	1624654	2210000	16	769338	1060000	16	2115322	2730000	16	1019762	1380000	16	1750678	2200000	16	1437364	1860000	16	1389258	1750000	16	1307296	1710000	16	1315797	1710000	16	1200502	1540000	16	1382712	1770000	16	1230303	1610000	16	1706612
P36871	Phosphoglucomutase-1 OS=Homo sapiens OX=9606 GN=PGM1 PE=1 SV=3	sp|P36871|PGM1_HUMAN	5	18502	21500	5	24463	32600	5	32069	52100	5	19527	28800	5	12408	17800	5	15067	22700	5	25352	38200	5	15856	17700	5	16426	24700	5	30239	46900	5	27100	45400	5	16419	18100	5	31527	49800	5	27154	41500	5	16666	23400	5	22147
P36915	Guanine nucleotide-binding protein-like 1 OS=Homo sapiens OX=9606 GN=GNL1 PE=1 SV=2	sp|P36915|GNL1_HUMAN	1	48111	48100	1	22405	22400	1	48242	48200	1	69275	69300	1	37887	37900	1	41860	41900	1	21845	21800	1	28936	28900	1	23834	23800	1	24336	24300	1	28333	28300	1	34232	34200	1	11127	11100	1	10491	10500	1	14876	14900	1	14873
P36954	DNA-directed RNA polymerase II subunit RPB9 OS=Homo sapiens OX=9606 GN=POLR2I PE=1 SV=1	sp|P36954|RPB9_HUMAN	5	17892	18600	5	19776	25600	5	47758	45900	5	23270	22400	5	31059	28800	5	42960	44400	5	25662	26400	5	20900	22600	5	21822	24200	5	23550	16900	5	47221	49200	5	42937	46900	5	17320	19000	5	11905	13000	5	17782	19500	5	46898
P36957	Dihydrolipoyllysine-residue succinyltransferase component of 2-oxoglutarate dehydrogenase complex, mitochondrial OS=Homo sapiens OX=9606 GN=DLST PE=1 SV=4	sp|P36957|ODO2_HUMAN	1	8269	8270	1	11885	11900	1	35180	35200	1	20871	20900	1	10774	10800	1	27970	28000	1	12931	12900	1	21697	21700	1	20420	20400	1	24002	24000	1	26166	26200	1	19615	19600	1	14620	14600	1	19536	19500	1	18739	18700	1	24978
P37108	Signal recognition particle 14 kDa protein OS=Homo sapiens OX=9606 GN=SRP14 PE=1 SV=2	sp|P37108|SRP14_HUMAN	6	342390	603000	6	259519	461000	6	392944	710000	6	352412	583000	6	213998	381000	6	526184	961000	6	287424	501000	6	461182	810000	6	357425	627000	6	430384	747000	6	358542	661000	6	417180	737000	6	352843	661000	6	286422	511000	6	380756	670000	6	541230
P37198	Nuclear pore glycoprotein p62 OS=Homo sapiens OX=9606 GN=NUP62 PE=1 SV=3	sp|P37198|NUP62_HUMAN	2	45825	91600	2	23038	46100	2	56425	113000	2	41462	82900	2	11585	#N/A	2	42251	#N/A	2	37228	#N/A	2	42916	85800	2	33117	#N/A	2	28545	#N/A	2	44051	88100	2	37754	#N/A	2	34398	68800	2	37043	74100	2	28642	57300	2	57147
P37837	Transaldolase OS=Homo sapiens OX=9606 GN=TALDO1 PE=1 SV=2	sp|P37837|TALDO_HUMAN	14	1715947	2610000	14	978543	1600000	14	1544393	2110000	14	1002759	1580000	14	569427	930000	14	945665	1560000	14	677486	1120000	14	1094359	1520000	14	807591	1320000	14	877771	1450000	14	1026369	1570000	14	1085256	1830000	14	850272	1240000	14	994111	1670000	14	912791	1380000	14	1156258
P38432	Coilin OS=Homo sapiens OX=9606 GN=COIL PE=1 SV=1	sp|P38432|COIL_HUMAN	1	5838	#N/A	1	2966	2970	1	4423	4420	1	2111	2110	1	1389	1390	1	2332	2330	1	1254	1250	1	3411	3410	1	2093	2090	1	4954	4950	1	3521	3520	1	1451	1450	1	3507	3510	1	1094	1090	1	2134	2130	1	1097
P38646	Stress-70 protein, mitochondrial OS=Homo sapiens OX=9606 GN=HSPA9 PE=1 SV=2	sp|P38646|GRP75_HUMAN	18	1030918	1090000	18	753835	839000	18	1628615	1790000	18	1141889	1030000	18	630418	602000	18	1162972	1360000	18	873325	745000	18	1292619	1160000	18	1034424	1020000	18	1149661	1130000	18	1258316	1420000	18	1405424	1380000	18	1507003	1320000	18	1309842	1170000	18	989533	879000	18	1463380
P38919	Eukaryotic initiation factor 4A-III OS=Homo sapiens OX=9606 GN=EIF4A3 PE=1 SV=4	sp|P38919|IF4A3_HUMAN	13	221082	307000	13	220759	319000	13	327545	476000	13	268246	418000	13	205890	327000	13	308503	459000	13	186473	286000	13	294708	419000	13	212018	297000	13	210925	327000	13	262727	393000	13	262154	379000	13	233320	343000	13	178965	258000	13	225711	314000	13	271800
P38936	Cyclin-dependent kinase inhibitor 1 OS=Homo sapiens OX=9606 GN=CDKN1A PE=1 SV=3	sp|P38936|CDN1A_HUMAN	1	9083	9080	1	3524	3520	1	6565	6570	1	9056	9060	1	3930	3930	1	7094	7090	1	5769	5770	1	8213	8210	1	6497	6500	1	9797	9800	1	12378	12400	1	4345	4340	1	3458	3460	1	12954	13000	1	7371	7370	1	6411
P39019	40S ribosomal protein S19 OS=Homo sapiens OX=9606 GN=RPS19 PE=1 SV=2	sp|P39019|RS19_HUMAN	7	581459	581000	7	495318	495000	7	860341	860000	7	482406	474000	7	212839	213000	7	700180	700000	7	530891	527000	7	463251	463000	7	337349	337000	7	407145	407000	7	379052	379000	7	862734	863000	7	737466	737000	7	499580	500000	7	357407	348000	7	613280
P39023	60S ribosomal protein L3 OS=Homo sapiens OX=9606 GN=RPL3 PE=1 SV=2	sp|P39023|RL3_HUMAN	17	620752	1340000	17	418000	712000	17	529580	743000	17	374929	545000	17	249580	385000	17	420194	651000	17	305958	461000	17	456807	717000	17	431936	756000	17	382577	570000	17	334728	439000	17	421857	629000	17	392652	610000	17	452830	875000	17	337344	521000	17	509211
P39687	Acidic leucine-rich nuclear phosphoprotein 32 family member A OS=Homo sapiens OX=9606 GN=ANP32A PE=1 SV=1	sp|P39687|AN32A_HUMAN	2	10486	10500	2	8001	8000	2	23932	23900	2	10580	9350	2	6408	6410	2	23666	23700	2	17635	17600	2	24074	15000	2	5237	5240	2	14368	14400	2	15424	12500	2	15802	14000	2	26481	26500	2	17153	17200	2	8213	8210	2	17940
P39748	Flap endonuclease 1 OS=Homo sapiens OX=9606 GN=FEN1 PE=1 SV=1	sp|P39748|FEN1_HUMAN	1	18908	#N/A	1	16526	16500	1	19560	19600	1	15166	15200	1	1398	1400	1	13074	#N/A	1	4265	4270	1	20983	21000	1	2602	#N/A	1	6737	#N/A	1	22667	#N/A	1	3177	3180	1	16252	#N/A	1	12533	#N/A	1	13211	#N/A	1	10143
P40121	Macrophage-capping protein OS=Homo sapiens OX=9606 GN=CAPG PE=1 SV=2	sp|P40121|CAPG_HUMAN	1	18189	18200	1	7950	7950	1	32452	32500	1	29680	29700	1	17022	17000	1	28846	28800	1	31457	31500	1	42945	42900	1	32831	32800	1	44768	44800	1	49937	49900	1	33456	33500	1	34016	34000	1	15693	15700	1	47819	47800	1	47512
P40123	Adenylyl cyclase-associated protein 2 OS=Homo sapiens OX=9606 GN=CAP2 PE=1 SV=1	sp|P40123|CAP2_HUMAN	1	52554	52600	1	30538	30500	1	48352	48400	1	27719	27700	1	23590	23600	1	28987	29000	1	25307	25300	1	41761	41800	1	32007	32000	1	40984	41000	1	40586	40600	1	27325	27300	1	12531	12500	1	29638	29600	1	33950	34000	1	48833
P40222	Alpha-taxilin OS=Homo sapiens OX=9606 GN=TXLNA PE=1 SV=3	sp|P40222|TXLNA_HUMAN	6	143530	192000	6	79625	52200	6	164927	232000	6	103496	93100	6	28846	28000	6	129373	155000	6	44939	38300	6	60164	88300	6	55893	83500	6	81875	130000	6	105161	150000	6	59880	95500	6	68463	102000	6	40850	68400	6	74718	89200	6	119109
P40227	T-complex protein 1 subunit zeta OS=Homo sapiens OX=9606 GN=CCT6A PE=1 SV=3	sp|P40227|TCPZ_HUMAN	3	171462	287000	3	131901	189000	3	203703	334000	3	204485	310000	3	116933	168000	3	158655	255000	3	110744	184000	3	169065	280000	3	127418	209000	3	110231	175000	3	137653	221000	3	138822	224000	3	136938	227000	3	106522	174000	3	116382	194000	3	170419
P40261	Nicotinamide N-methyltransferase OS=Homo sapiens OX=9606 GN=NNMT PE=1 SV=1	sp|P40261|NNMT_HUMAN	7	89990	117000	7	54142	71800	7	163870	208000	7	85997	102000	7	210958	259000	7	216832	276000	7	306662	375000	7	264624	352000	7	176239	224000	7	412805	505000	7	275559	326000	7	220578	280000	7	299568	401000	7	180891	236000	7	252336	321000	7	188892
P40429	60S ribosomal protein L13a OS=Homo sapiens OX=9606 GN=RPL13A PE=1 SV=2	sp|P40429|RL13A_HUMAN	2	86196	86200	2	55013	55000	2	125941	126000	2	77881	77900	2	32224	7550	2	88307	9110	2	59791	5010	2	99725	12500	2	51070	3550	2	66847	10300	2	79285	79300	2	54451	5830	2	74556	74600	2	76018	76000	2	78550	1760	2	118363
P40926	Malate dehydrogenase, mitochondrial OS=Homo sapiens OX=9606 GN=MDH2 PE=1 SV=3	sp|P40926|MDHM_HUMAN	2	148759	149000	2	187608	188000	2	319099	319000	2	314658	315000	2	141316	141000	2	389525	390000	2	258422	258000	2	334643	335000	2	262524	263000	2	287993	288000	2	330348	330000	2	331003	331000	2	347233	347000	2	377101	377000	2	282430	282000	2	290048
P40939	Trifunctional enzyme subunit alpha, mitochondrial OS=Homo sapiens OX=9606 GN=HADHA PE=1 SV=2	sp|P40939|ECHA_HUMAN	36	1583822	1970000	36	816195	985000	36	1606013	2020000	36	1191096	1530000	36	809166	1010000	36	1471751	1940000	36	1203722	1490000	36	1330914	1740000	36	996386	1160000	36	1466122	1920000	36	1260237	1560000	36	1163767	1430000	36	1152858	1470000	36	1573388	2030000	36	1121363	1430000	36	1126308
P41091	Eukaryotic translation initiation factor 2 subunit 3 OS=Homo sapiens OX=9606 GN=EIF2S3 PE=1 SV=3	sp|P41091|IF2G_HUMAN	5	109922	215000	5	69382	135000	5	127757	250000	5	74717	145000	5	60687	118000	5	95051	184000	5	80463	156000	5	93861	181000	5	71561	138000	5	103104	202000	5	108950	211000	5	112718	216000	5	95740	187000	5	70736	140000	5	79726	158000	5	125084
P41208	Centrin-2 OS=Homo sapiens OX=9606 GN=CETN2 PE=1 SV=1	sp|P41208|CETN2_HUMAN	1	18759	18800	1	16640	16600	1	7804	7800	1	8597	8600	1	9266	9270	1	17949	#N/A	1	7574	7570	1	19371	19400	1	13615	13600	1	12924	12900	1	23614	23600	1	20370	20400	1	10984	11000	1	9335	9330	1	10829	10800	1	11209
P41214	Eukaryotic translation initiation factor 2D OS=Homo sapiens OX=9606 GN=EIF2D PE=1 SV=3	sp|P41214|EIF2D_HUMAN	1	2917	2920	1	4715	4720	1	7911	7910	1	10523	10500	1	8875	8880	1	10106	10100	1	5802	5800	1	2570	2570	1	9591	9590	1	1900	#N/A	1	2927	2930	1	3520	#N/A	1	2179	2180	1	3953	3950	1	4952	4950	1	4079
P41226	Ubiquitin-like modifier-activating enzyme 7 OS=Homo sapiens OX=9606 GN=UBA7 PE=1 SV=2	sp|P41226|UBA7_HUMAN	6	97840	72700	6	91012	67600	6	98292	98300	6	84482	84500	6	62772	33100	6	104182	83200	6	71183	59200	6	54917	41600	6	53584	53600	6	90772	79800	6	73675	73700	6	99602	54200	6	74714	74700	6	91346	91300	6	86238	70800	6	89263
P41227	N-alpha-acetyltransferase 10 OS=Homo sapiens OX=9606 GN=NAA10 PE=1 SV=1	sp|P41227|NAA10_HUMAN	1	7806	7810	1	15778	15800	1	23675	23700	1	5844	5840	1	11155	11200	1	8610	8610	1	9865	9870	1	31867	31900	1	12829	12800	1	14909	14900	1	11094	11100	1	16473	#N/A	1	6624	6620	1	10171	10200	1	11305	11300	1	7798
P41240	Tyrosine-protein kinase CSK OS=Homo sapiens OX=9606 GN=CSK PE=1 SV=1	sp|P41240|CSK_HUMAN	11	122610	74800	11	197333	186000	11	172394	151000	11	136442	118000	11	92954	88900	11	138564	93100	11	110400	110000	11	92570	59700	11	144271	128000	11	148376	98500	11	92030	65800	11	127647	117000	11	193367	186000	11	98721	71000	11	89019	76200	11	195699
P41250	Glycine--tRNA ligase OS=Homo sapiens OX=9606 GN=GARS PE=1 SV=3	sp|P41250|GARS_HUMAN	29	1303804	1880000	29	1005248	1300000	29	1375504	1930000	29	1117362	1660000	29	1296374	1930000	29	1266914	1820000	29	1309827	1840000	29	1537716	2160000	29	1140364	1560000	29	1715324	2440000	29	1906998	2710000	29	1965387	2730000	29	1941934	2710000	29	1652299	2270000	29	1650679	2230000	29	1658966
P41252	Isoleucine--tRNA ligase, cytoplasmic OS=Homo sapiens OX=9606 GN=IARS PE=1 SV=2	sp|P41252|SYIC_HUMAN	33	3547785	6280000	33	463272	402000	33	814826	959000	33	605652	653000	33	541040	546000	33	949825	920000	33	2642233	4730000	33	879139	911000	33	615805	566000	33	2592071	4480000	33	949644	1020000	33	884067	898000	33	849781	950000	33	821726	852000	33	702276	789000	33	897456
P41567	Eukaryotic translation initiation factor 1 OS=Homo sapiens OX=9606 GN=EIF1 PE=1 SV=1	sp|P41567|EIF1_HUMAN	1	1631	1630	1	895	895	1	4298	4300	1	5945	5950	1	3304	3300	1	2437	2440	1	4237	4240	1	1648	1650	1	1801	1800	1	3788	3790	1	2109	2110	1	2147	2150	1	3862	3860	1	1895	1890	1	785	785	1	3352
P41743	Protein kinase C iota type OS=Homo sapiens OX=9606 GN=PRKCI PE=1 SV=2	sp|P41743|KPCI_HUMAN	8	139278	149000	8	87197	94300	8	182827	200000	8	97818	106000	8	61059	56200	8	101016	113000	8	98457	114000	8	117784	130000	8	87296	94700	8	118927	128000	8	92477	102000	8	99133	109000	8	93826	105000	8	111668	120000	8	61620	64400	8	112528
P42025	Beta-centractin OS=Homo sapiens OX=9606 GN=ACTR1B PE=1 SV=1	sp|P42025|ACTY_HUMAN	3	139371	139000	3	133507	134000	3	205590	206000	3	151529	152000	3	103695	104000	3	183977	184000	3	181242	181000	3	182544	180000	3	197034	197000	3	195490	195000	3	178672	179000	3	163312	163000	3	166822	167000	3	166886	167000	3	136323	136000	3	186455
P42166	Lamina-associated polypeptide 2, isoform alpha OS=Homo sapiens OX=9606 GN=TMPO PE=1 SV=2	sp|P42166|LAP2A_HUMAN	11	459815	889000	11	217003	411000	11	261922	468000	11	195091	361000	11	154674	285000	11	132415	193000	11	238286	449000	11	231429	432000	11	265382	504000	11	315635	622000	11	74073	113000	11	240723	441000	11	178460	325000	11	270958	527000	11	158873	303000	11	228750
P42167	Lamina-associated polypeptide 2, isoforms beta/gamma OS=Homo sapiens OX=9606 GN=TMPO PE=1 SV=2	sp|P42167|LAP2B_HUMAN	4	181707	291000	4	191850	316000	4	352982	614000	4	221229	370000	4	114765	183000	4	329661	571000	4	182251	300000	4	258170	455000	4	209242	361000	4	172343	288000	4	202639	354000	4	237829	407000	4	218333	385000	4	148321	256000	4	143084	237000	4	315067
P42224	Signal transducer and activator of transcription 1-alpha/beta OS=Homo sapiens OX=9606 GN=STAT1 PE=1 SV=2	sp|P42224|STAT1_HUMAN	4	201136	387000	4	106414	202000	4	128736	237000	4	101533	187000	4	83075	162000	4	143035	279000	4	77728	149000	4	202727	359000	4	124607	220000	4	179584	348000	4	244891	449000	4	123754	233000	4	159862	295000	4	233556	445000	4	116139	217000	4	89976
P42226	Signal transducer and activator of transcription 6 OS=Homo sapiens OX=9606 GN=STAT6 PE=1 SV=1	sp|P42226|STAT6_HUMAN	1	5573	5570	1	8872	8870	1	2209	2210	1	11947	11900	1	12275	12300	1	9513	9510	1	2358	#N/A	1	2289	2290	1	11189	11200	1	3459	3460	1	12138	12100	1	12747	12700	1	5639	5640	1	5805	5800	1	2534	2530	1	4690
P42285	Exosome RNA helicase MTR4 OS=Homo sapiens OX=9606 GN=MTREX PE=1 SV=3	sp|P42285|MTREX_HUMAN	11	178683	155000	11	114352	99200	11	184174	112000	11	133190	109000	11	70720	60100	11	133150	118000	11	78360	61400	11	130115	98100	11	103711	91500	11	140016	127000	11	142571	118000	11	103670	78800	11	128708	83700	11	85728	67600	11	100494	89200	11	158484
P42345	Serine/threonine-protein kinase mTOR OS=Homo sapiens OX=9606 GN=MTOR PE=1 SV=1	sp|P42345|MTOR_HUMAN	10	79574	48400	10	82346	82300	10	118800	119000	10	64107	47400	10	42669	39400	10	92152	92200	10	60472	57100	10	102228	52100	10	77484	63900	10	69014	54300	10	50083	34000	10	69306	53300	10	54283	37000	10	65881	57800	10	65525	51900	10	85165
P42356	Phosphatidylinositol 4-kinase alpha OS=Homo sapiens OX=9606 GN=PI4KA PE=1 SV=4	sp|P42356|PI4KA_HUMAN	4	17550	19800	4	11480	5960	4	24970	32900	4	18688	9780	4	11084	15400	4	13186	9060	4	15935	21200	4	22721	28700	4	20224	10800	4	27463	40100	4	29030	28500	4	7914	3660	4	10873	15100	4	22958	12100	4	20708	13500	4	21583
P42574	Caspase-3 OS=Homo sapiens OX=9606 GN=CASP3 PE=1 SV=2	sp|P42574|CASP3_HUMAN	3	81861	81900	3	62931	62900	3	93176	93200	3	41316	41300	3	36783	34300	3	74339	74300	3	43581	43600	3	59395	59400	3	55838	47000	3	71688	65400	3	61255	61300	3	62407	56700	3	61598	61600	3	70210	70200	3	47789	47800	3	67800
P42694	Probable helicase with zinc finger domain OS=Homo sapiens OX=9606 GN=HELZ PE=1 SV=2	sp|P42694|HELZ_HUMAN	1	1662	1660	1	646	646	1	1483	1480	1	687	687	1	328	328	1	1173	1170	1	492	492	1	1381	1380	1	839	839	1	1001	1000	1	561	561	1	870	870	1	1274	1270	1	848	848	1	889	889	1	1247
P42695	Condensin-2 complex subunit D3 OS=Homo sapiens OX=9606 GN=NCAPD3 PE=1 SV=2	sp|P42695|CNDD3_HUMAN	3	34368	9060	3	14081	4160	3	57013	33100	3	22157	22200	3	7060	4290	3	27168	17800	3	18030	11600	3	29557	12300	3	22451	16900	3	48418	23000	3	44214	#N/A	3	20020	8130	3	42956	18700	3	27882	27900	3	21064	10400	3	33413
P42696	RNA-binding protein 34 OS=Homo sapiens OX=9606 GN=RBM34 PE=1 SV=2	sp|P42696|RBM34_HUMAN	1	22593	22600	1	12348	12300	1	56739	56700	1	54282	54300	1	1126	#N/A	1	58300	58300	1	35391	35400	1	6900	6900	1	41744	41700	1	74923	74900	1	47307	47300	1	30493	30500	1	61071	61100	1	61012	61000	1	44610	44600	1	60555
P42704	Leucine-rich PPR motif-containing protein, mitochondrial OS=Homo sapiens OX=9606 GN=LRPPRC PE=1 SV=3	sp|P42704|LPPRC_HUMAN	39	959480	1230000	39	711257	849000	39	1112529	1320000	39	716892	907000	39	596106	773000	39	803170	1050000	39	565346	694000	39	964919	1180000	39	735553	945000	39	860549	1080000	39	666611	890000	39	963860	1230000	39	671169	842000	39	662542	809000	39	747365	936000	39	928003
P42765	3-ketoacyl-CoA thiolase, mitochondrial OS=Homo sapiens OX=9606 GN=ACAA2 PE=1 SV=2	sp|P42765|THIM_HUMAN	18	303464	397000	18	244066	306000	18	424879	496000	18	275350	288000	18	262342	342000	18	345832	442000	18	339398	424000	18	363594	469000	18	286256	354000	18	379414	460000	18	435884	544000	18	368816	469000	18	432431	508000	18	284096	353000	18	350218	411000	18	348062
P42766	60S ribosomal protein L35 OS=Homo sapiens OX=9606 GN=RPL35 PE=1 SV=2	sp|P42766|RL35_HUMAN	2	4257	3060	2	21660	21700	2	53354	53400	2	38389	38400	2	17930	17900	2	40080	40100	2	29499	29500	2	36044	36000	2	30103	30100	2	37848	37800	2	21464	21500	2	32559	32600	2	37490	37500	2	45513	45500	2	31868	31900	2	45333
P42773	Cyclin-dependent kinase 4 inhibitor C OS=Homo sapiens OX=9606 GN=CDKN2C PE=1 SV=1	sp|P42773|CDN2C_HUMAN	2	26734	26700	2	57313	57300	2	42531	40600	2	57344	57300	2	50580	50600	2	40638	40600	2	62349	62300	2	42813	42800	2	23061	23100	2	40839	40800	2	30678	30700	2	9623	2370	2	33974	34000	2	48110	48100	2	20944	20900	2	36445
P42858	Huntingtin OS=Homo sapiens OX=9606 GN=HTT PE=1 SV=2	sp|P42858|HD_HUMAN	8	90450	135000	8	42088	58400	8	77081	81300	8	79609	94900	8	48171	41300	8	55834	71600	8	53564	57700	8	79047	97900	8	60822	88400	8	68789	83700	8	51137	58700	8	58121	69900	8	62105	80300	8	106704	129000	8	46931	63800	8	70765
P43005	Excitatory amino acid transporter 3 OS=Homo sapiens OX=9606 GN=SLC1A1 PE=1 SV=2	sp|P43005|EAA3_HUMAN	1	142038	142000	1	269765	270000	1	155302	155000	1	27170	27200	1	155747	156000	1	309592	310000	1	198650	199000	1	207833	208000	1	13132	#N/A	1	218130	218000	1	162211	162000	1	223792	224000	1	140478	140000	1	146904	147000	1	243255	243000	1	272628
P43007	Neutral amino acid transporter A OS=Homo sapiens OX=9606 GN=SLC1A4 PE=1 SV=1	sp|P43007|SATT_HUMAN	2	21527	21500	2	113816	114000	2	131933	132000	2	38932	38900	2	49844	49800	2	19011	19000	2	27564	27600	2	38975	39000	2	105540	19500	2	25567	25600	2	44350	44400	2	26369	26400	2	79717	79700	2	83053	25100	2	23377	23400	2	38272
P43034	Platelet-activating factor acetylhydrolase IB subunit alpha OS=Homo sapiens OX=9606 GN=PAFAH1B1 PE=1 SV=2	sp|P43034|LIS1_HUMAN	10	191307	143000	10	63509	34200	10	202869	48800	10	90248	47100	10	43590	41900	10	73298	49500	10	57727	43600	10	172242	120000	10	54783	47800	10	50368	53000	10	169657	35000	10	52845	54300	10	139213	47900	10	89637	35600	10	75571	50200	10	78478
P43235	Cathepsin K OS=Homo sapiens OX=9606 GN=CTSK PE=1 SV=1	sp|P43235|CATK_HUMAN	3	35343	63300	3	33562	65400	3	51856	99500	3	54817	103000	3	39699	77400	3	50458	91800	3	60431	107000	3	42607	76500	3	16162	3770	3	69076	120000	3	56727	107000	3	43506	78800	3	45363	88900	3	38383	71100	3	34662	61600	3	43696
P43243	Matrin-3 OS=Homo sapiens OX=9606 GN=MATR3 PE=1 SV=2	sp|P43243|MATR3_HUMAN	10	170150	257000	10	162048	291000	10	403047	724000	10	269865	492000	10	166176	288000	10	267443	460000	10	186254	339000	10	255743	447000	10	184057	326000	10	214155	395000	10	256645	469000	10	233352	395000	10	200221	365000	10	180892	314000	10	174341	279000	10	282704
P43246	DNA mismatch repair protein Msh2 OS=Homo sapiens OX=9606 GN=MSH2 PE=1 SV=1	sp|P43246|MSH2_HUMAN	1	3503	3500	1	4698	4700	1	1867	1870	1	1540	1540	1	1821	1820	1	4969	4970	1	480	#N/A	1	4051	4050	1	806	806	1	1717	1720	1	3182	3180	1	2626	2630	1	2192	2190	1	1695	1700	1	1823	1820	1	3091
P43307	Translocon-associated protein subunit alpha OS=Homo sapiens OX=9606 GN=SSR1 PE=1 SV=3	sp|P43307|SSRA_HUMAN	1	33451	33500	1	23606	23600	1	47164	47200	1	30706	30700	1	19437	19400	1	36357	36400	1	25888	25900	1	35375	35400	1	27010	27000	1	48704	48700	1	30441	30400	1	36490	36500	1	41048	41000	1	38150	38200	1	26475	26500	1	36938
P43378	Tyrosine-protein phosphatase non-receptor type 9 OS=Homo sapiens OX=9606 GN=PTPN9 PE=1 SV=1	sp|P43378|PTN9_HUMAN	5	702563	703000	5	367991	361000	5	753545	754000	5	30062	30100	5	408038	404000	5	722725	710000	5	426437	426000	5	716084	716000	5	565526	556000	5	713256	713000	5	452813	453000	5	826295	826000	5	585592	586000	5	372520	373000	5	571115	571000	5	712093
P43490	Nicotinamide phosphoribosyltransferase OS=Homo sapiens OX=9606 GN=NAMPT PE=1 SV=1	sp|P43490|NAMPT_HUMAN	9	111419	145000	9	82345	121000	9	245481	389000	9	229134	410000	9	131881	223000	9	129323	198000	9	158804	243000	9	180400	310000	9	44613	48500	9	186239	309000	9	164358	260000	9	137184	230000	9	113229	171000	9	150711	257000	9	121250	185000	9	161624
P45877	Peptidyl-prolyl cis-trans isomerase C OS=Homo sapiens OX=9606 GN=PPIC PE=1 SV=1	sp|P45877|PPIC_HUMAN	4	304316	401000	4	134209	181000	4	314403	471000	4	171196	234000	4	244239	331000	4	122244	179000	4	257884	356000	4	355156	485000	4	262954	373000	4	406468	573000	4	296821	413000	4	175892	242000	4	348833	501000	4	445611	623000	4	245833	331000	4	354270
P45973	Chromobox protein homolog 5 OS=Homo sapiens OX=9606 GN=CBX5 PE=1 SV=1	sp|P45973|CBX5_HUMAN	2	12005	9710	2	8479	2730	2	24623	24600	2	17351	17400	2	11356	1220	2	19023	19000	2	9791	9790	2	20345	20300	2	16560	16600	2	17398	3140	2	14682	14700	2	19291	3950	2	17439	17400	2	17733	17700	2	7923	7920	2	22043
P46019	Phosphorylase b kinase regulatory subunit alpha, liver isoform OS=Homo sapiens OX=9606 GN=PHKA2 PE=1 SV=1	sp|P46019|KPB2_HUMAN	1	2628	2630	1	1117	1120	1	2226	#N/A	1	947	947	1	725	725	1	2045	2040	1	1053	1050	1	4048	#N/A	1	992	992	1	1219	1220	1	1595	1600	1	499	499	1	1669	1670	1	2302	#N/A	1	1223	#N/A	1	6220
P46060	Ran GTPase-activating protein 1 OS=Homo sapiens OX=9606 GN=RANGAP1 PE=1 SV=1	sp|P46060|RAGP1_HUMAN	17	401167	353000	17	242911	136000	17	440102	444000	17	298438	258000	17	143600	104000	17	267826	235000	17	237063	174000	17	272732	242000	17	208200	160000	17	256053	239000	17	213388	177000	17	249853	134000	17	210243	126000	17	216034	186000	17	202046	163000	17	324974
P46063	ATP-dependent DNA helicase Q1 OS=Homo sapiens OX=9606 GN=RECQL PE=1 SV=3	sp|P46063|RECQ1_HUMAN	19	249139	363000	19	133805	169000	19	279344	321000	19	145656	216000	19	112002	163000	19	252322	388000	19	144113	195000	19	228231	286000	19	181393	254000	19	171695	250000	19	192187	214000	19	175441	253000	19	222327	296000	19	98394	109000	19	162055	229000	19	220820
P46108	Adapter molecule crk OS=Homo sapiens OX=9606 GN=CRK PE=1 SV=2	sp|P46108|CRK_HUMAN	1	2016	2020	1	3467	3470	1	38666	38700	1	19212	19200	1	17498	17500	1	15542	15500	1	18872	18900	1	23204	23200	1	20413	20400	1	4323	4320	1	10026	10000	1	7018	7020	1	25523	25500	1	29060	29100	1	9714	9710	1	8998
P46108-2	Isoform Crk-I of Adapter molecule crk OS=Homo sapiens OX=9606 GN=CRK	sp|P46108-2|CRK_HUMAN	2	31669	63300	2	7349	14700	2	32734	65500	2	27876	55800	2	8252	16500	2	39293	78600	2	15957	31900	2	38334	76700	2	14592	29200	2	27091	54200	2	38396	76800	2	38739	77500	2	29181	58400	2	26705	53400	2	17271	34500	2	27873
P46109	Crk-like protein OS=Homo sapiens OX=9606 GN=CRKL PE=1 SV=1	sp|P46109|CRKL_HUMAN	5	95184	123000	5	41140	60600	5	94100	149000	5	61659	93500	5	50021	79400	5	114067	156000	5	65283	100000	5	91126	123000	5	73605	116000	5	71777	100000	5	80671	103000	5	75418	119000	5	94680	111000	5	70258	86100	5	59931	75100	5	87231
P46199	Translation initiation factor IF-2, mitochondrial OS=Homo sapiens OX=9606 GN=MTIF2 PE=1 SV=2	sp|P46199|IF2M_HUMAN	2	21959	43900	2	73913	148000	2	20372	40700	2	9110	18200	2	10447	20900	2	89192	178000	2	10239	20500	2	74883	150000	2	17354	34700	2	8230	16500	2	86832	#N/A	2	19945	39900	2	37778	75600	2	18003	36000	2	18846	37700	2	13313
P46459	Vesicle-fusing ATPase OS=Homo sapiens OX=9606 GN=NSF PE=1 SV=3	sp|P46459|NSF_HUMAN	1	69058	69100	1	83084	83100	1	6865	6870	1	8928	8930	1	45977	46000	1	81631	81600	1	56364	56400	1	62761	62800	1	67245	67200	1	69494	69500	1	14761	14800	1	71730	71700	1	5855	5860	1	52153	52200	1	50793	50800	1	86975
P46776	60S ribosomal protein L27a OS=Homo sapiens OX=9606 GN=RPL27A PE=1 SV=2	sp|P46776|RL27A_HUMAN	4	566927	567000	4	484579	485000	4	914849	899000	4	602323	602000	4	335088	335000	4	741781	725000	4	450294	450000	4	549144	536000	4	565208	565000	4	518888	513000	4	516835	517000	4	544601	538000	4	513985	502000	4	464450	464000	4	466036	466000	4	781805
P46777	60S ribosomal protein L5 OS=Homo sapiens OX=9606 GN=RPL5 PE=1 SV=3	sp|P46777|RL5_HUMAN	10	751130	1390000	10	689187	1300000	10	1418162	1440000	10	775930	1430000	10	500595	614000	10	1050084	1940000	10	692958	1270000	10	1022800	1890000	10	822886	1510000	10	946340	1140000	10	850107	1570000	10	921643	1080000	10	847522	1570000	10	757977	1380000	10	779790	1440000	10	1140846
P46778	60S ribosomal protein L21 OS=Homo sapiens OX=9606 GN=RPL21 PE=1 SV=2	sp|P46778|RL21_HUMAN	7	319470	619000	7	404646	800000	7	570868	1120000	7	359364	702000	7	214135	426000	7	526872	1050000	7	323988	636000	7	331629	662000	7	404681	806000	7	390286	753000	7	364481	725000	7	417130	826000	7	328627	656000	7	308141	613000	7	312856	624000	7	578566
P46781	40S ribosomal protein S9 OS=Homo sapiens OX=9606 GN=RPS9 PE=1 SV=3	sp|P46781|RS9_HUMAN	9	1007611	1300000	9	752737	734000	9	1594327	1420000	9	834878	828000	9	497004	457000	9	1023689	1020000	9	674174	624000	9	1178136	1040000	9	814930	771000	9	902445	825000	9	946099	837000	9	960645	925000	9	987032	814000	9	783553	805000	9	826887	789000	9	1161220
P46782	40S ribosomal protein S5 OS=Homo sapiens OX=9606 GN=RPS5 PE=1 SV=4	sp|P46782|RS5_HUMAN	14	1135031	2170000	14	1225486	2340000	14	1521239	2930000	14	1423932	2750000	14	870017	1700000	14	1850439	3620000	14	1177975	2300000	14	1725705	3360000	14	1516873	2950000	14	1588481	3100000	14	1592548	3130000	14	1625872	3170000	14	1434879	2800000	14	1272707	2480000	14	1369497	2670000	14	2073090
P46783	40S ribosomal protein S10 OS=Homo sapiens OX=9606 GN=RPS10 PE=1 SV=1	sp|P46783|RS10_HUMAN	2	325215	325000	2	392509	386000	2	494792	463000	2	541058	541000	2	348962	344000	2	735518	736000	2	510562	511000	2	655713	656000	2	570304	570000	2	643103	634000	2	569411	569000	2	652352	652000	2	666000	649000	2	570349	560000	2	490396	486000	2	768964
P46821	Microtubule-associated protein 1B OS=Homo sapiens OX=9606 GN=MAP1B PE=1 SV=2	sp|P46821|MAP1B_HUMAN	70	1922844	3000000	70	1384633	1920000	70	2348161	3440000	70	1937190	2750000	70	1016090	1500000	70	2013792	2770000	70	1226467	1700000	70	1833717	2810000	70	1377842	2110000	70	1232105	1860000	70	1260716	1980000	70	1699137	2390000	70	1896382	2980000	70	1562067	2270000	70	1342195	2090000	70	1864704
P46926	Glucosamine-6-phosphate isomerase 1 OS=Homo sapiens OX=9606 GN=GNPDA1 PE=1 SV=1	sp|P46926|GNPI1_HUMAN	1	25842	25800	1	15615	15600	1	26970	27000	1	16440	16400	1	11145	#N/A	1	17810	17800	1	9069	9070	1	35752	35800	1	21659	21700	1	24910	24900	1	28015	28000	1	15113	15100	1	25865	25900	1	19758	19800	1	15010	15000	1	7397
P46934-4	Isoform 4 of E3 ubiquitin-protein ligase NEDD4 OS=Homo sapiens OX=9606 GN=NEDD4	sp|P46934-4|NEDD4_HUMAN	2	37595	37600	2	28246	28200	2	27633	27600	2	17755	17800	2	40964	36000	2	26806	#N/A	2	16151	4820	2	29356	29400	2	20641	#N/A	2	27272	7490	2	16333	9010	2	87875	78200	2	19915	19900	2	16082	16100	2	23267	23300	2	25997
P46939	Utrophin OS=Homo sapiens OX=9606 GN=UTRN PE=1 SV=2	sp|P46939|UTRO_HUMAN	1	8620	8620	1	4157	4160	1	19643	19600	1	8414	8410	1	4270	4270	1	11721	11700	1	8984	8980	1	8267	8270	1	6398	6400	1	4851	4850	1	11508	11500	1	8542	8540	1	9603	9600	1	8412	8410	1	11192	11200	1	8194
P46940	Ras GTPase-activating-like protein IQGAP1 OS=Homo sapiens OX=9606 GN=IQGAP1 PE=1 SV=1	sp|P46940|IQGA1_HUMAN	60	2149259	3210000	60	1512694	2070000	60	2844498	4090000	60	2162512	3220000	60	1611585	2420000	60	2800555	3240000	60	1881310	2750000	60	2910460	4020000	60	1961045	2730000	60	2538507	3770000	60	2006685	2890000	60	2013132	2580000	60	2018644	2930000	60	1627933	2320000	60	2165940	3060000	60	2799446
P46977	Dolichyl-diphosphooligosaccharide--protein glycosyltransferase subunit STT3A OS=Homo sapiens OX=9606 GN=STT3A PE=1 SV=2	sp|P46977|STT3A_HUMAN	3	71376	71400	3	43240	42100	3	115067	115000	3	72429	70300	3	57613	57600	3	94911	94900	3	76333	76300	3	86532	84800	3	81556	77700	3	101294	101000	3	91622	79100	3	85662	85700	3	108437	108000	3	103256	92300	3	69683	60900	3	93682
P47224	Guanine nucleotide exchange factor MSS4 OS=Homo sapiens OX=9606 GN=RABIF PE=1 SV=2	sp|P47224|MSS4_HUMAN	1	12926	#N/A	1	6439	#N/A	1	17966	18000	1	4472	4470	1	8471	8470	1	12582	12600	1	5179	5180	1	9696	9700	1	2968	#N/A	1	15051	15100	1	7971	7970	1	7402	7400	1	5362	5360	1	6229	6230	1	10538	#N/A	1	9333
P47712	Cytosolic phospholipase A2 OS=Homo sapiens OX=9606 GN=PLA2G4A PE=1 SV=2	sp|P47712|PA24A_HUMAN	1	7624	7620	1	16672	16700	1	8145	8150	1	2879	2880	1	88048	88000	1	15192	15200	1	198713	199000	1	8070	8070	1	9250	#N/A	1	346458	346000	1	16854	16900	1	10271	10300	1	12344	12300	1	4586	4590	1	6926	6930	1	13208
P47755	F-actin-capping protein subunit alpha-2 OS=Homo sapiens OX=9606 GN=CAPZA2 PE=1 SV=3	sp|P47755|CAZA2_HUMAN	7	196421	382000	7	165909	326000	7	301163	583000	7	168175	332000	7	111821	220000	7	228440	451000	7	143310	282000	7	200548	379000	7	186946	363000	7	226977	446000	7	252712	493000	7	215651	415000	7	173414	341000	7	240711	476000	7	212864	415000	7	213480
P47756-2	Isoform 2 of F-actin-capping protein subunit beta OS=Homo sapiens OX=9606 GN=CAPZB	sp|P47756-2|CAPZB_HUMAN	1	11622	11600	1	3568	3570	1	17549	17500	1	13389	13400	1	7008	7010	1	11027	11000	1	11684	11700	1	15210	15200	1	9167	9170	1	8159	8160	1	12062	12100	1	8398	8400	1	15309	15300	1	11835	11800	1	8459	8460	1	15111
P47895	Aldehyde dehydrogenase family 1 member A3 OS=Homo sapiens OX=9606 GN=ALDH1A3 PE=1 SV=2	sp|P47895|AL1A3_HUMAN	7	91969	111000	7	96727	140000	7	92788	120000	7	68595	85400	7	53816	35000	7	96012	89300	7	83531	111000	7	62571	79100	7	103220	140000	7	188952	174000	7	163949	222000	7	430068	483000	7	241324	339000	7	55807	71600	7	96988	119000	7	81747
P47897	Glutamine--tRNA ligase OS=Homo sapiens OX=9606 GN=QARS PE=1 SV=1	sp|P47897|SYQ_HUMAN	1	18326	#N/A	1	20310	20300	1	28051	#N/A	1	7806	#N/A	1	4648	4650	1	26470	26500	1	6135	6140	1	26911	#N/A	1	9305	9310	1	12206	12200	1	24710	#N/A	1	12754	#N/A	1	5386	#N/A	1	12147	12100	1	11119	#N/A	1	11509
P47914	60S ribosomal protein L29 OS=Homo sapiens OX=9606 GN=RPL29 PE=1 SV=2	sp|P47914|RL29_HUMAN	3	123296	237000	3	112075	214000	3	190534	363000	3	150419	288000	3	71842	140000	3	168621	320000	3	83348	162000	3	146891	282000	3	103209	196000	3	137881	269000	3	127840	244000	3	127060	245000	3	136893	263000	3	132480	252000	3	106146	203000	3	181013
P47929	Galectin-7 OS=Homo sapiens OX=9606 GN=LGALS7 PE=1 SV=2	sp|P47929|LEG7_HUMAN	2	7596	7600	2	14810	14800	2	322642	1470	2	10149	10100	2	8001	8000	2	15035	15000	2	9205	9210	2	9104	9100	2	8813	8810	2	10819	1050	2	10741	10700	2	17861	17900	2	12592	12600	2	5607	886	2	8433	8430	2	16311
P47985	Cytochrome b-c1 complex subunit Rieske, mitochondrial OS=Homo sapiens OX=9606 GN=UQCRFS1 PE=1 SV=2	sp|P47985|UCRI_HUMAN	1	10995	11000	1	1479	1480	1	6556	6560	1	8165	8160	1	2912	2910	1	8418	8420	1	9385	9380	1	9901	9900	1	5186	5190	1	7852	7850	1	11246	11200	1	3808	3810	1	2753	2750	1	9396	9400	1	9509	9510	1	8208
P48047	ATP synthase subunit O, mitochondrial OS=Homo sapiens OX=9606 GN=ATP5O PE=1 SV=1	sp|P48047|ATPO_HUMAN	11	801447	960000	11	594006	734000	11	879285	986000	11	666645	838000	11	408643	517000	11	744547	867000	11	563188	669000	11	747840	849000	11	675302	829000	11	700000	832000	11	653891	756000	11	689692	838000	11	646570	788000	11	789894	894000	11	553025	617000	11	782853
P48058	Glutamate receptor 4 OS=Homo sapiens OX=9606 GN=GRIA4 PE=2 SV=2	sp|P48058|GRIA4_HUMAN	1	27800	27800	1	19293	19300	1	25508	25500	1	23512	23500	1	8339	8340	1	12579	12600	1	13287	13300	1	21309	21300	1	20007	20000	1	15389	15400	1	11458	11500	1	14998	15000	1	9670	9670	1	9361	9360	1	3841	3840	1	17533
P48060	Glioma pathogenesis-related protein 1 OS=Homo sapiens OX=9606 GN=GLIPR1 PE=1 SV=3	sp|P48060|GLIP1_HUMAN	2	20969	14100	2	6427	6430	2	16492	16500	2	6941	6940	2	5272	5270	2	9668	9670	2	6755	6760	2	18129	6340	2	5844	5840	2	12388	12400	2	17669	9090	2	6964	6960	2	9946	6630	2	7098	7100	2	7404	7400	2	11566
P48147	Prolyl endopeptidase OS=Homo sapiens OX=9606 GN=PREP PE=1 SV=2	sp|P48147|PPCE_HUMAN	18	383462	481000	18	205640	255000	18	419727	514000	18	279503	324000	18	196394	215000	18	373219	388000	18	219424	285000	18	359116	459000	18	298870	384000	18	316797	413000	18	352997	433000	18	316292	373000	18	331360	439000	18	341559	379000	18	274151	367000	18	371278
P48163	NADP-dependent malic enzyme OS=Homo sapiens OX=9606 GN=ME1 PE=1 SV=1	sp|P48163|MAOX_HUMAN	1	16103	16100	1	11219	11200	1	34807	34800	1	27162	27200	1	10731	10700	1	17286	17300	1	8235	8240	1	27861	27900	1	35385	35400	1	15669	15700	1	10707	10700	1	31955	32000	1	9328	9330	1	23972	24000	1	9002	9000	1	8093
P48444	Coatomer subunit delta OS=Homo sapiens OX=9606 GN=ARCN1 PE=1 SV=1	sp|P48444|COPD_HUMAN	7	493327	481000	7	347877	348000	7	526967	511000	7	348223	346000	7	259721	248000	7	425916	418000	7	371595	372000	7	461774	448000	7	364934	350000	7	420101	419000	7	432282	425000	7	434661	419000	7	403496	404000	7	345991	339000	7	444176	440000	7	550946
P48506	Glutamate--cysteine ligase catalytic subunit OS=Homo sapiens OX=9606 GN=GCLC PE=1 SV=2	sp|P48506|GSH1_HUMAN	3	12008	12000	3	10605	8660	3	18030	18000	3	11716	5700	3	6459	6460	3	12334	12300	3	7849	7850	3	22726	22700	3	17554	17600	3	21284	21300	3	19617	19600	3	13893	4360	3	20835	20800	3	7538	7540	3	8803	8800	3	17235
P48507	Glutamate--cysteine ligase regulatory subunit OS=Homo sapiens OX=9606 GN=GCLM PE=1 SV=1	sp|P48507|GSH0_HUMAN	2	22771	45500	2	33754	67500	2	54045	108000	2	21599	#N/A	2	19601	39200	2	41802	83600	2	51639	#N/A	2	46126	92300	2	18469	36900	2	30035	60100	2	40934	81900	2	41860	83700	2	46268	92500	2	25123	50200	2	35023	70000	2	38580
P48509	CD151 antigen OS=Homo sapiens OX=9606 GN=CD151 PE=1 SV=3	sp|P48509|CD151_HUMAN	3	96913	96900	3	76293	76300	3	100692	79400	3	50529	48400	3	51350	51400	3	100690	101000	3	68958	69000	3	107092	107000	3	51661	51700	3	79306	79300	3	100116	100000	3	63233	63200	3	66610	66600	3	82598	82600	3	65491	65500	3	73179
P48556	26S proteasome non-ATPase regulatory subunit 8 OS=Homo sapiens OX=9606 GN=PSMD8 PE=1 SV=2	sp|P48556|PSMD8_HUMAN	8	145033	130000	8	168764	168000	8	259993	220000	8	149407	142000	8	126851	121000	8	197279	197000	8	125200	125000	8	188245	150000	8	123958	106000	8	168071	165000	8	134186	126000	8	152877	139000	8	183031	159000	8	160697	146000	8	120666	99900	8	165294
P48637	Glutathione synthetase OS=Homo sapiens OX=9606 GN=GSS PE=1 SV=1	sp|P48637|GSHB_HUMAN	2	16692	4110	2	9024	#N/A	2	11170	11200	2	6602	730	2	4624	4620	2	12565	12600	2	4720	3210	2	11614	#N/A	2	3497	#N/A	2	4878	4880	2	6990	6990	2	2301	2300	2	6632	6630	2	5390	3350	2	9073	4910	2	7606
P48643	T-complex protein 1 subunit epsilon OS=Homo sapiens OX=9606 GN=CCT5 PE=1 SV=1	sp|P48643|TCPE_HUMAN	3	216963	217000	3	215653	216000	3	437821	438000	3	291299	291000	3	168413	168000	3	344058	344000	3	210116	210000	3	295478	295000	3	253528	221000	3	255656	256000	3	262997	263000	3	342959	318000	3	272028	272000	3	180353	180000	3	233097	233000	3	358674
P48681	Nestin OS=Homo sapiens OX=9606 GN=NES PE=1 SV=2	sp|P48681|NEST_HUMAN	24	494319	657000	24	240164	307000	24	672629	842000	24	280240	368000	24	241741	297000	24	658635	718000	24	301058	384000	24	456029	564000	24	378637	491000	24	305907	427000	24	268412	381000	24	316412	387000	24	309067	409000	24	279082	392000	24	239788	333000	24	472718
P48723	Heat shock 70 kDa protein 13 OS=Homo sapiens OX=9606 GN=HSPA13 PE=1 SV=1	sp|P48723|HSP13_HUMAN	1	16605	16600	1	10997	11000	1	21727	21700	1	13834	13800	1	4146	4150	1	29437	29400	1	1552	1550	1	2802	2800	1	13212	13200	1	21389	21400	1	6558	6560	1	17496	17500	1	13751	13800	1	11295	11300	1	5832	5830	1	11252
P49005	DNA polymerase delta subunit 2 OS=Homo sapiens OX=9606 GN=POLD2 PE=1 SV=1	sp|P49005|DPOD2_HUMAN	6	25609	25600	6	30536	29500	6	43481	40900	6	28464	28500	6	16710	16700	6	34506	29800	6	22402	17900	6	23693	19300	6	36111	35200	6	38060	30300	6	30479	30500	6	33554	32600	6	28055	28100	6	19372	13400	6	33218	33200	6	51816
P49137	MAP kinase-activated protein kinase 2 OS=Homo sapiens OX=9606 GN=MAPKAPK2 PE=1 SV=1	sp|P49137|MAPK2_HUMAN	1	4611	4610	1	1184	1180	1	10914	10900	1	4364	#N/A	1	2184	2180	1	8411	#N/A	1	3297	#N/A	1	11131	11100	1	5102	#N/A	1	5125	#N/A	1	2300	2300	1	1626	1630	1	7069	7070	1	4704	4700	1	8604	8600	1	5781
P49189	4-trimethylaminobutyraldehyde dehydrogenase OS=Homo sapiens OX=9606 GN=ALDH9A1 PE=1 SV=3	sp|P49189|AL9A1_HUMAN	1	5354	5350	1	18187	18200	1	23253	23300	1	2331	#N/A	1	2333	2330	1	15708	15700	1	3995	#N/A	1	2925	#N/A	1	5687	5690	1	3679	#N/A	1	3238	#N/A	1	16636	16600	1	4692	4690	1	16141	16100	1	18393	18400	1	8338
P49207	60S ribosomal protein L34 OS=Homo sapiens OX=9606 GN=RPL34 PE=1 SV=3	sp|P49207|RL34_HUMAN	4	146268	146000	4	228782	229000	4	434281	434000	4	250527	251000	4	152548	153000	4	336375	336000	4	211266	211000	4	307062	307000	4	281966	282000	4	300557	301000	4	209535	210000	4	332214	332000	4	231717	232000	4	196462	196000	4	251663	252000	4	365097
P49247	Ribose-5-phosphate isomerase OS=Homo sapiens OX=9606 GN=RPIA PE=1 SV=3	sp|P49247|RPIA_HUMAN	1	50389	50400	1	3583	3580	1	30915	30900	1	9018	9020	1	9613	#N/A	1	13636	13600	1	23082	#N/A	1	15149	15100	1	17141	#N/A	1	5010	5010	1	13259	13300	1	9881	9880	1	9677	9680	1	16755	16800	1	14086	14100	1	23010
P49257	Protein ERGIC-53 OS=Homo sapiens OX=9606 GN=LMAN1 PE=1 SV=2	sp|P49257|LMAN1_HUMAN	13	595526	816000	13	194881	268000	13	652004	926000	13	348715	508000	13	243010	381000	13	458580	687000	13	369492	535000	13	495398	684000	13	350283	521000	13	463174	696000	13	380114	508000	13	433867	665000	13	487624	675000	13	471818	652000	13	350669	438000	13	484706
P49327	Fatty acid synthase OS=Homo sapiens OX=9606 GN=FASN PE=1 SV=3	sp|P49327|FAS_HUMAN	93	2264568	2910000	93	1550657	2320000	93	3037422	3850000	93	2139240	2840000	93	1240726	1690000	93	2577175	3380000	93	1841088	2530000	93	2761376	3700000	93	2223265	2500000	93	2208653	2420000	93	2424070	3330000	93	2514586	3300000	93	2449592	3300000	93	1503280	1690000	93	2210871	3040000	93	2782401
P49368	T-complex protein 1 subunit gamma OS=Homo sapiens OX=9606 GN=CCT3 PE=1 SV=4	sp|P49368|TCPG_HUMAN	8	246120	442000	8	219530	366000	8	300740	432000	8	258586	458000	8	191961	345000	8	246703	395000	8	244801	444000	8	214178	387000	8	197762	361000	8	239380	404000	8	234574	424000	8	224382	411000	8	214002	390000	8	168191	309000	8	172649	304000	8	220918
P49406	39S ribosomal protein L19, mitochondrial OS=Homo sapiens OX=9606 GN=MRPL19 PE=1 SV=2	sp|P49406|RM19_HUMAN	3	61291	61300	3	38220	27400	3	103499	104000	3	68124	68100	3	24214	24200	3	62559	55700	3	43875	43900	3	64011	21500	3	55947	54200	3	44402	44400	3	42379	22900	3	38312	38300	3	85180	57000	3	89050	52500	3	46616	24000	3	83845
P49411	Elongation factor Tu, mitochondrial OS=Homo sapiens OX=9606 GN=TUFM PE=1 SV=2	sp|P49411|EFTU_HUMAN	25	566295	774000	25	450303	607000	25	751533	1000000	25	553597	763000	25	333551	460000	25	703483	957000	25	522516	714000	25	627224	828000	25	576003	753000	25	587923	800000	25	654780	870000	25	721915	970000	25	682633	921000	25	553479	758000	25	528173	722000	25	711008
P49427	Ubiquitin-conjugating enzyme E2 R1 OS=Homo sapiens OX=9606 GN=CDC34 PE=1 SV=2	sp|P49427|UB2R1_HUMAN	1	1715	1710	1	2024	2020	1	4997	5000	1	1159	1160	1	443	443	1	2108	2110	1	453	453	1	1071	1070	1	2146	2150	1	1613	1610	1	1585	1590	1	2492	#N/A	1	1166	1170	1	1329	1330	1	1027	1030	1	1939
P49441	Inositol polyphosphate 1-phosphatase OS=Homo sapiens OX=9606 GN=INPP1 PE=1 SV=1	sp|P49441|INPP_HUMAN	3	16871	16900	3	8210	8210	3	14270	14300	3	10682	10700	3	8367	8370	3	10224	10200	3	10473	10500	3	15264	15300	3	14179	14200	3	9239	9240	3	14558	14600	3	12197	12200	3	14694	14700	3	16916	16900	3	14032	14000	3	13756
P49458	Signal recognition particle 9 kDa protein OS=Homo sapiens OX=9606 GN=SRP9 PE=1 SV=2	sp|P49458|SRP09_HUMAN	2	42227	8070	2	9854	9850	2	30482	30500	2	13740	13700	2	12347	12300	2	30693	30700	2	14369	12100	2	34229	2090	2	8286	1220	2	18578	18600	2	22032	16600	2	16619	16600	2	42566	2340	2	24617	2300	2	12962	13000	2	14934
P49585	Choline-phosphate cytidylyltransferase A OS=Homo sapiens OX=9606 GN=PCYT1A PE=1 SV=2	sp|P49585|PCY1A_HUMAN	4	56319	56300	4	80180	80200	4	89208	89200	4	90949	90900	4	46302	26900	4	88665	34600	4	82705	82700	4	95937	95900	4	78372	78400	4	79166	77800	4	27862	27900	4	85996	43300	4	74021	74000	4	95419	95400	4	41786	27900	4	94600
P49588	Alanine--tRNA ligase, cytoplasmic OS=Homo sapiens OX=9606 GN=AARS PE=1 SV=2	sp|P49588|SYAC_HUMAN	1	32521	32500	1	27469	27500	1	31838	31800	1	39015	39000	1	28386	28400	1	39645	39600	1	11425	#N/A	1	39792	39800	1	31544	31500	1	37713	37700	1	38420	38400	1	54690	54700	1	48762	48800	1	26750	26800	1	27962	28000	1	41200
P49589-3	Isoform 3 of Cysteine--tRNA ligase, cytoplasmic OS=Homo sapiens OX=9606 GN=CARS	sp|P49589-3|SYCC_HUMAN	3	48307	48300	3	66572	66600	3	86873	86900	3	56069	56100	3	29086	27900	3	103640	103000	3	48538	48500	3	68805	68800	3	37381	37400	3	66973	67000	3	26499	9980	3	93840	93800	3	26919	8720	3	37891	37900	3	49294	49300	3	87668
P49591	Serine--tRNA ligase, cytoplasmic OS=Homo sapiens OX=9606 GN=SARS PE=1 SV=3	sp|P49591|SYSC_HUMAN	11	1002751	1510000	11	375979	532000	11	1204673	1810000	11	853765	1400000	11	964965	1600000	11	818076	1210000	11	981238	1560000	11	1190776	1790000	11	906987	1480000	11	1158827	1800000	11	1268609	1810000	11	1384857	2210000	11	1123460	1430000	11	1159600	1730000	11	962326	1340000	11	1137214
P49643	DNA primase large subunit OS=Homo sapiens OX=9606 GN=PRIM2 PE=1 SV=2	sp|P49643|PRI2_HUMAN	1	4720	4720	1	3058	#N/A	1	14251	#N/A	1	7782	7780	1	1874	1870	1	804	804	1	2170	2170	1	6249	6250	1	9701	9700	1	12809	12800	1	2724	2720	1	5162	#N/A	1	3189	3190	1	3220	3220	1	4407	4410	1	5560
P49720	Proteasome subunit beta type-3 OS=Homo sapiens OX=9606 GN=PSMB3 PE=1 SV=2	sp|P49720|PSB3_HUMAN	9	475860	791000	9	326623	535000	9	619217	1050000	9	399157	616000	9	238681	402000	9	542895	878000	9	360152	553000	9	563265	917000	9	373182	553000	9	434344	727000	9	473380	805000	9	406949	743000	9	472486	808000	9	366317	657000	9	431893	705000	9	535575
P49721	Proteasome subunit beta type-2 OS=Homo sapiens OX=9606 GN=PSMB2 PE=1 SV=1	sp|P49721|PSB2_HUMAN	5	315875	377000	5	212981	254000	5	466334	504000	5	334231	419000	5	192710	206000	5	354453	369000	5	263379	281000	5	369274	384000	5	287151	322000	5	327167	350000	5	337593	393000	5	363075	410000	5	389040	425000	5	265337	281000	5	281029	300000	5	406421
P49736	DNA replication licensing factor MCM2 OS=Homo sapiens OX=9606 GN=MCM2 PE=1 SV=4	sp|P49736|MCM2_HUMAN	20	286312	277000	20	251188	231000	20	483582	397000	20	325782	292000	20	187711	153000	20	295233	277000	20	328805	314000	20	240060	263000	20	238915	213000	20	212625	214000	20	227087	150000	20	248013	196000	20	263598	207000	20	171978	174000	20	196366	176000	20	281899
P49755	Transmembrane emp24 domain-containing protein 10 OS=Homo sapiens OX=9606 GN=TMED10 PE=1 SV=2	sp|P49755|TMEDA_HUMAN	6	286172	285000	6	169789	141000	6	321865	328000	6	169611	167000	6	140633	141000	6	250399	226000	6	210253	197000	6	261193	266000	6	320412	319000	6	247145	246000	6	244133	248000	6	238136	238000	6	266651	271000	6	258808	266000	6	181152	183000	6	251662
P49756	RNA-binding protein 25 OS=Homo sapiens OX=9606 GN=RBM25 PE=1 SV=3	sp|P49756|RBM25_HUMAN	4	108126	108000	4	87808	83200	4	121549	122000	4	284318	284000	4	32141	30200	4	199694	200000	4	183982	180000	4	83556	83600	4	316103	316000	4	65335	65300	4	62674	62700	4	164994	160000	4	55143	46000	4	44716	42400	4	76326	76300	4	369501
P49770	Translation initiation factor eIF-2B subunit beta OS=Homo sapiens OX=9606 GN=EIF2B2 PE=1 SV=3	sp|P49770|EI2BB_HUMAN	5	50250	3000	5	28735	1560	5	81828	160000	5	19184	8330	5	17771	20000	5	21112	20400	5	19190	32700	5	65336	16600	5	12943	2710	5	18093	31700	5	68338	20400	5	22791	40900	5	22603	38800	5	19211	35200	5	48732	13100	5	32938
P49773	Histidine triad nucleotide-binding protein 1 OS=Homo sapiens OX=9606 GN=HINT1 PE=1 SV=2	sp|P49773|HINT1_HUMAN	9	245945	587000	9	170200	457000	9	298547	766000	9	227269	608000	9	151472	406000	9	305376	844000	9	134454	343000	9	202268	482000	9	136448	346000	9	214437	575000	9	194410	481000	9	226018	604000	9	132333	327000	9	123583	300000	9	198953	535000	9	207594
P49792	E3 SUMO-protein ligase RanBP2 OS=Homo sapiens OX=9606 GN=RANBP2 PE=1 SV=2	sp|P49792|RBP2_HUMAN	20	265010	278000	20	118425	117000	20	240434	236000	20	138450	145000	20	94769	87100	20	205950	216000	20	147179	139000	20	155513	163000	20	184498	199000	20	165051	186000	20	177617	176000	20	151382	134000	20	99650	107000	20	152382	162000	20	146897	151000	20	193104
P49840	Glycogen synthase kinase-3 alpha OS=Homo sapiens OX=9606 GN=GSK3A PE=1 SV=2	sp|P49840|GSK3A_HUMAN	1	4699	4700	1	1858	#N/A	1	9624	#N/A	1	2960	2960	1	3777	3780	1	3830	3830	1	2440	2440	1	4460	#N/A	1	4682	4680	1	2723	2720	1	3048	3050	1	4820	4820	1	4388	4390	1	1687	1690	1	3679	#N/A	1	3754
P49917	DNA ligase 4 OS=Homo sapiens OX=9606 GN=LIG4 PE=1 SV=2	sp|P49917|DNLI4_HUMAN	1	14640	14600	1	8509	8510	1	12276	12300	1	13746	13700	1	7068	7070	1	6441	6440	1	9632	9630	1	6275	6270	1	7632	7630	1	9801	9800	1	13459	13500	1	4650	4650	1	6308	#N/A	1	26475	26500	1	7224	7220	1	10662
P50148	Guanine nucleotide-binding protein G(q) subunit alpha OS=Homo sapiens OX=9606 GN=GNAQ PE=1 SV=4	sp|P50148|GNAQ_HUMAN	4	82935	82900	4	38456	30900	4	77467	77500	4	23113	23100	4	25762	17200	4	89260	38300	4	61543	61500	4	62339	48300	4	70195	11900	4	74013	15000	4	82985	71300	4	73198	24500	4	113062	113000	4	122474	122000	4	90160	90200	4	91762
P50213	Isocitrate dehydrogenase [NAD] subunit alpha, mitochondrial OS=Homo sapiens OX=9606 GN=IDH3A PE=1 SV=1	sp|P50213|IDH3A_HUMAN	1	4252	4250	1	7900	7900	1	8862	8860	1	6622	6620	1	3336	3340	1	5939	5940	1	6032	6030	1	4715	4710	1	5842	5840	1	3106	3110	1	4963	4960	1	1001	1000	1	6847	6850	1	5021	5020	1	4883	4880	1	7342
P50238	Cysteine-rich protein 1 OS=Homo sapiens OX=9606 GN=CRIP1 PE=1 SV=3	sp|P50238|CRIP1_HUMAN	1	15214	15200	1	7808	7810	1	22474	22500	1	5922	5920	1	22209	22200	1	1266	1270	1	8544	8540	1	17424	17400	1	18038	18000	1	3398	3400	1	4277	4280	1	900	900	1	17900	17900	1	1117	1120	1	21628	21600	1	45743
P50281	Matrix metalloproteinase-14 OS=Homo sapiens OX=9606 GN=MMP14 PE=1 SV=3	sp|P50281|MMP14_HUMAN	8	197385	253000	8	76379	112000	8	143834	78700	8	126314	41300	8	65750	20600	8	128211	163000	8	104075	42500	8	170040	252000	8	99130	30400	8	100672	119000	8	114737	180000	8	86874	124000	8	151637	86700	8	109019	155000	8	102877	56900	8	147070
P50336	Protoporphyrinogen oxidase OS=Homo sapiens OX=9606 GN=PPOX PE=1 SV=1	sp|P50336|PPOX_HUMAN	2	5758	5760	2	7461	7460	2	10676	10700	2	8255	8250	2	4106	4110	2	3800	3800	2	6275	6280	2	6642	6640	2	6430	6430	2	56645	56600	2	4861	4860	2	6046	6050	2	6908	6910	2	2740	2740	2	6679	6680	2	30963
P50395	Rab GDP dissociation inhibitor beta OS=Homo sapiens OX=9606 GN=GDI2 PE=1 SV=2	sp|P50395|GDIB_HUMAN	2	16103	32200	2	12253	24500	2	10671	21300	2	26856	53700	2	27562	55100	2	28260	56500	2	30469	60900	2	30791	61600	2	21899	43800	2	29027	58100	2	33155	66300	2	27772	55500	2	31155	62300	2	26632	53300	2	19771	39500	2	25961
P50402	Emerin OS=Homo sapiens OX=9606 GN=EMD PE=1 SV=1	sp|P50402|EMD_HUMAN	8	94710	101000	8	55096	48900	8	94832	118000	8	59063	70200	8	30214	34100	8	81465	90400	8	69482	97100	8	80301	81200	8	58004	51100	8	68002	53800	8	65726	72200	8	72901	85300	8	73035	73700	8	65439	82800	8	64831	92300	8	75217
P50454	Serpin H1 OS=Homo sapiens OX=9606 GN=SERPINH1 PE=1 SV=2	sp|P50454|SERPH_HUMAN	37	9488509	17100000	37	4375359	7810000	37	9560515	17300000	37	5647491	9870000	37	6654479	11700000	37	9234055	16100000	37	7761817	13600000	37	9115788	15900000	37	6757608	11700000	37	11672267	20400000	37	11789318	21100000	37	11234258	19600000	37	14949402	26400000	37	13064387	22800000	37	7842820	13600000	37	9813732
P50479	PDZ and LIM domain protein 4 OS=Homo sapiens OX=9606 GN=PDLIM4 PE=1 SV=2	sp|P50479|PDLI4_HUMAN	4	239830	163000	4	95005	95000	4	141518	124000	4	120155	96700	4	91313	69900	4	151146	141000	4	109250	86200	4	101823	82400	4	120406	113000	4	143804	144000	4	119648	120000	4	155358	146000	4	121035	121000	4	175992	176000	4	102552	93800	4	131540
P50552	Vasodilator-stimulated phosphoprotein OS=Homo sapiens OX=9606 GN=VASP PE=1 SV=3	sp|P50552|VASP_HUMAN	12	477405	476000	12	250131	250000	12	551751	532000	12	292684	264000	12	206876	199000	12	373327	353000	12	283850	261000	12	350910	330000	12	243243	217000	12	305849	285000	12	325911	323000	12	307037	259000	12	314106	303000	12	392906	389000	12	275235	269000	12	361750
P50583	Bis(5'-nucleosyl)-tetraphosphatase [asymmetrical] OS=Homo sapiens OX=9606 GN=NUDT2 PE=1 SV=3	sp|P50583|AP4A_HUMAN	4	47747	79300	4	40271	59700	4	69871	99800	4	63067	48900	4	29286	39500	4	75852	73500	4	65217	109000	4	74337	109000	4	53967	78400	4	64064	97900	4	39089	52500	4	54810	60900	4	62592	88800	4	71723	58500	4	56309	75400	4	72115
P50747	Biotin--protein ligase OS=Homo sapiens OX=9606 GN=HLCS PE=1 SV=1	sp|P50747|BPL1_HUMAN	1	14561	14600	1	8130	#N/A	1	21576	21600	1	11177	11200	1	14882	#N/A	1	20216	#N/A	1	5038	#N/A	1	18254	18300	1	10495	10500	1	13367	13400	1	21974	22000	1	20159	20200	1	21773	21800	1	45148	45100	1	15178	15200	1	66604
P50897	Palmitoyl-protein thioesterase 1 OS=Homo sapiens OX=9606 GN=PPT1 PE=1 SV=1	sp|P50897|PPT1_HUMAN	3	48364	11600	3	131195	212000	3	156187	296000	3	147408	247000	3	57955	3320	3	166546	265000	3	70236	5970	3	167084	266000	3	149647	247000	3	91622	176000	3	108968	207000	3	93370	14500	3	115171	221000	3	153942	239000	3	95594	176000	3	131674
P50914	60S ribosomal protein L14 OS=Homo sapiens OX=9606 GN=RPL14 PE=1 SV=4	sp|P50914|RL14_HUMAN	8	1314621	2420000	8	1312902	2390000	8	2508250	4520000	8	1567518	2840000	8	903725	1630000	8	1891633	3360000	8	1216029	2210000	8	1664739	3010000	8	1528079	2770000	8	1625151	2890000	8	1495338	2760000	8	1721935	3090000	8	1448230	2640000	8	1237728	2280000	8	1337030	2440000	8	2063708
P50990	T-complex protein 1 subunit theta OS=Homo sapiens OX=9606 GN=CCT8 PE=1 SV=4	sp|P50990|TCPQ_HUMAN	2	55958	52900	2	42201	42200	2	82716	80600	2	62030	62000	2	29269	29300	2	92439	92400	2	61148	61100	2	74270	74300	2	54393	54400	2	25881	25900	2	33013	33000	2	65573	65600	2	83445	81900	2	25628	25600	2	67378	67400	2	126751
P50991	T-complex protein 1 subunit delta OS=Homo sapiens OX=9606 GN=CCT4 PE=1 SV=4	sp|P50991|TCPD_HUMAN	1	596	596	1	1717	1720	1	5290	5290	1	699	699	1	1320	1320	1	1465	1470	1	1333	1330	1	2592	2590	1	235	235	1	886	886	1	2627	2630	1	2034	2030	1	1832	1830	1	689	689	1	558	558	1	3904
P51114-2	Isoform 2 of Fragile X mental retardation syndrome-related protein 1 OS=Homo sapiens OX=9606 GN=FXR1	sp|P51114-2|FXR1_HUMAN	1	79878	79900	1	36961	37000	1	83698	83700	1	65231	65200	1	62350	62400	1	7243	7240	1	55774	55800	1	66523	66500	1	60136	60100	1	73905	73900	1	85275	85300	1	71920	71900	1	74680	74700	1	89869	89900	1	75219	75200	1	64125
P51116	Fragile X mental retardation syndrome-related protein 2 OS=Homo sapiens OX=9606 GN=FXR2 PE=1 SV=2	sp|P51116|FXR2_HUMAN	4	50565	19500	4	21354	22200	4	61910	63500	4	31159	31900	4	19803	17600	4	32703	33300	4	20498	19700	4	48126	48900	4	71163	73700	4	20904	23000	4	29643	31300	4	22935	25900	4	16795	17800	4	25740	27800	4	56843	23000	4	35947
P51149	Ras-related protein Rab-7a OS=Homo sapiens OX=9606 GN=RAB7A PE=1 SV=1	sp|P51149|RAB7A_HUMAN	12	1131115	1470000	12	813086	1030000	12	2162850	2730000	12	1263043	1590000	12	844676	1090000	12	1340309	1740000	12	1240628	1630000	12	1428725	1800000	12	1291234	1650000	12	1517804	1950000	12	1397522	1800000	12	1559352	1990000	12	1479172	1850000	12	1217080	1560000	12	1269241	1620000	12	1636124
P51151	Ras-related protein Rab-9A OS=Homo sapiens OX=9606 GN=RAB9A PE=1 SV=1	sp|P51151|RAB9A_HUMAN	2	73643	73600	2	51494	51500	2	73757	73800	2	46699	46700	2	32280	32300	2	110735	111000	2	61758	61800	2	57851	57900	2	54450	54500	2	51002	51000	2	40996	41000	2	50936	50900	2	42412	42400	2	68845	68800	2	37582	37600	2	76676
P51153	Ras-related protein Rab-13 OS=Homo sapiens OX=9606 GN=RAB13 PE=1 SV=1	sp|P51153|RAB13_HUMAN	3	108161	108000	3	49735	49700	3	87057	84000	3	76651	74700	3	38955	17000	3	82352	28800	3	71487	25500	3	106686	105000	3	75163	28300	3	99340	38400	3	101042	101000	3	81329	28100	3	64840	62300	3	58339	58300	3	80459	80500	3	82207
P51397	Death-associated protein 1 OS=Homo sapiens OX=9606 GN=DAP PE=1 SV=3	sp|P51397|DAP1_HUMAN	1	6478	6480	1	2005	2010	1	5130	5130	1	2219	2220	1	547	547	1	3575	3580	1	1887	1890	1	2666	2670	1	2559	2560	1	1448	1450	1	2053	2050	1	2005	2010	1	2009	2010	1	2899	2900	1	2338	2340	1	2338
P51452	Dual specificity protein phosphatase 3 OS=Homo sapiens OX=9606 GN=DUSP3 PE=1 SV=1	sp|P51452|DUS3_HUMAN	1	6602	6600	1	1622	#N/A	1	6041	6040	1	3444	3440	1	1947	#N/A	1	6728	6730	1	2509	2510	1	6260	6260	1	5428	5430	1	2779	#N/A	1	5194	5190	1	2987	#N/A	1	8537	8540	1	4695	4700	1	4069	4070	1	3587
P51553	Isocitrate dehydrogenase [NAD] subunit gamma, mitochondrial OS=Homo sapiens OX=9606 GN=IDH3G PE=1 SV=1	sp|P51553|IDH3G_HUMAN	1	19922	19900	1	16253	16300	1	10632	10600	1	17602	17600	1	4296	4300	1	23273	23300	1	12241	12200	1	24181	24200	1	11546	11500	1	25128	25100	1	10376	10400	1	6675	6680	1	17997	18000	1	13200	13200	1	8836	8840	1	20228
P51571	Translocon-associated protein subunit delta OS=Homo sapiens OX=9606 GN=SSR4 PE=1 SV=1	sp|P51571|SSRD_HUMAN	9	951243	2000000	9	458102	955000	9	965613	2060000	9	549913	1130000	9	420903	828000	9	706632	1520000	9	635570	1310000	9	770243	1620000	9	621087	1280000	9	885961	1810000	9	752737	1520000	9	713661	1440000	9	769007	1450000	9	831590	1750000	9	651355	1320000	9	872314
P51580	Thiopurine S-methyltransferase OS=Homo sapiens OX=9606 GN=TPMT PE=1 SV=1	sp|P51580|TPMT_HUMAN	4	59890	53300	4	42544	37400	4	87060	87100	4	54782	49300	4	26148	1830	4	65332	52200	4	45316	42200	4	59267	55600	4	50626	47900	4	19296	17600	4	51988	52000	4	51285	9870	4	49840	49800	4	47399	45700	4	36568	36600	4	72586
P51659	Peroxisomal multifunctional enzyme type 2 OS=Homo sapiens OX=9606 GN=HSD17B4 PE=1 SV=3	sp|P51659|DHB4_HUMAN	3	143992	144000	3	96067	96100	3	159498	160000	3	110990	111000	3	79333	71500	3	119996	114000	3	109612	106000	3	149067	149000	3	103178	103000	3	165546	166000	3	128758	129000	3	140731	141000	3	124522	125000	3	118686	119000	3	129123	129000	3	125069
P51665	26S proteasome non-ATPase regulatory subunit 7 OS=Homo sapiens OX=9606 GN=PSMD7 PE=1 SV=2	sp|P51665|PSMD7_HUMAN	12	298885	520000	12	271015	491000	12	474120	830000	12	300426	517000	12	265318	473000	12	412697	718000	12	369572	642000	12	509468	922000	12	463274	834000	12	404892	710000	12	363091	631000	12	412948	712000	12	368681	621000	12	341679	591000	12	367443	664000	12	448702
P51688	N-sulphoglucosamine sulphohydrolase OS=Homo sapiens OX=9606 GN=SGSH PE=1 SV=1	sp|P51688|SPHM_HUMAN	3	28263	24500	3	13088	13100	3	23862	23900	3	14814	14800	3	13424	6280	3	20041	12400	3	18145	14800	3	24713	24700	3	28954	10800	3	31469	4460	3	15302	15300	3	19686	6910	3	13041	13000	3	14050	6160	3	17021	15400	3	30603
P51784	Ubiquitin carboxyl-terminal hydrolase 11 OS=Homo sapiens OX=9606 GN=USP11 PE=1 SV=3	sp|P51784|UBP11_HUMAN	2	15904	15900	2	13564	13600	2	32533	32500	2	14765	14800	2	6339	6340	2	11122	11100	2	11842	11800	2	11224	6970	2	8453	8450	2	8347	8350	2	11503	11500	2	16159	16200	2	15896	15900	2	9093	9090	2	17208	17200	2	35001
P51805	Plexin-A3 OS=Homo sapiens OX=9606 GN=PLXNA3 PE=1 SV=2	sp|P51805|PLXA3_HUMAN	3	77549	77500	3	29306	29300	3	36319	36300	3	53136	53100	3	39817	39800	3	49482	49500	3	47153	47200	3	18684	18700	3	46618	46600	3	72712	72700	3	33966	34000	3	47040	47000	3	31317	31300	3	59008	59000	3	45351	45400	3	71120
P51808	Dynein light chain Tctex-type 3 OS=Homo sapiens OX=9606 GN=DYNLT3 PE=1 SV=1	sp|P51808|DYLT3_HUMAN	1	4811	4810	1	2572	2570	1	5086	5090	1	2672	2670	1	614	614	1	5847	5850	1	5221	5220	1	5070	5070	1	3267	3270	1	2585	2580	1	2122	2120	1	866	#N/A	1	5521	5520	1	3767	3770	1	2458	2460	1	4365
P51812	Ribosomal protein S6 kinase alpha-3 OS=Homo sapiens OX=9606 GN=RPS6KA3 PE=1 SV=1	sp|P51812|KS6A3_HUMAN	8	141394	122000	8	109644	94100	8	135783	97700	8	62372	31100	8	83923	80300	8	84887	81300	8	112431	101000	8	217827	190000	8	128898	121000	8	194926	188000	8	148182	117000	8	110334	95300	8	168689	147000	8	153711	141000	8	74354	50100	8	154644
P51858	Hepatoma-derived growth factor OS=Homo sapiens OX=9606 GN=HDGF PE=1 SV=1	sp|P51858|HDGF_HUMAN	1	15791	15800	1	10679	10700	1	11814	11800	1	6459	6460	1	5892	5890	1	12790	12800	1	3883	3880	1	11231	11200	1	6327	6330	1	9864	9860	1	5857	5860	1	13098	13100	1	2330	2330	1	3929	3930	1	2429	2430	1	14512
P51884	Lumican OS=Homo sapiens OX=9606 GN=LUM PE=1 SV=2	sp|P51884|LUM_HUMAN	7	248597	240000	7	88049	69800	7	116703	114000	7	77683	62000	7	63419	63400	7	365182	234000	7	119992	120000	7	186214	165000	7	128888	122000	7	159907	124000	7	85823	64700	7	107966	59000	7	101861	90700	7	126995	127000	7	155716	156000	7	164364
P51911	Calponin-1 OS=Homo sapiens OX=9606 GN=CNN1 PE=1 SV=2	sp|P51911|CNN1_HUMAN	1	69162	69200	1	17435	17400	1	71661	71700	1	23675	23700	1	25971	26000	1	26975	27000	1	35992	36000	1	28565	28600	1	32420	32400	1	3568	3570	1	19625	19600	1	35784	35800	1	87576	87600	1	32346	32300	1	41482	41500	1	30512
P51970	NADH dehydrogenase [ubiquinone] 1 alpha subcomplex subunit 8 OS=Homo sapiens OX=9606 GN=NDUFA8 PE=1 SV=3	sp|P51970|NDUA8_HUMAN	1	4236	4240	1	3465	3460	1	4453	4450	1	3047	3050	1	1789	1790	1	3539	3540	1	2256	2260	1	4287	4290	1	1959	1960	1	2719	2720	1	4512	4510	1	4140	4140	1	2525	2520	1	2216	2220	1	1638	1640	1	4307
P52292	Importin subunit alpha-1 OS=Homo sapiens OX=9606 GN=KPNA2 PE=1 SV=1	sp|P52292|IMA1_HUMAN	9	248731	271000	9	199454	218000	9	714243	795000	9	332237	364000	9	159247	166000	9	235948	248000	9	215446	241000	9	200888	215000	9	184996	209000	9	232671	247000	9	242041	237000	9	201272	214000	9	295453	316000	9	223603	240000	9	155880	167000	9	401768
P52294	Importin subunit alpha-5 OS=Homo sapiens OX=9606 GN=KPNA1 PE=1 SV=3	sp|P52294|IMA5_HUMAN	2	3638	3640	2	1100	1100	2	4176	4180	2	4481	4480	2	1894	1890	2	4589	4590	2	4568	4570	2	3607	3610	2	4314	4310	2	4318	4320	2	7626	7630	2	3941	3940	2	4045	4040	2	1931	1930	2	3833	3830	2	2469
P52565	Rho GDP-dissociation inhibitor 1 OS=Homo sapiens OX=9606 GN=ARHGDIA PE=1 SV=3	sp|P52565|GDIR1_HUMAN	1	487052	487000	1	276537	277000	1	632950	633000	1	472598	473000	1	288426	288000	1	591055	591000	1	364512	365000	1	255779	256000	1	403599	404000	1	440539	441000	1	421259	421000	1	472686	473000	1	475182	475000	1	451775	452000	1	474318	474000	1	551189
P52597	Heterogeneous nuclear ribonucleoprotein F OS=Homo sapiens OX=9606 GN=HNRNPF PE=1 SV=3	sp|P52597|HNRPF_HUMAN	19	397742	630000	19	386127	689000	19	614922	1110000	19	511768	890000	19	312405	543000	19	675648	1150000	19	461944	826000	19	569396	1030000	19	497355	840000	19	534286	771000	19	520754	953000	19	482071	809000	19	541816	967000	19	358849	627000	19	416294	736000	19	681065
P52657	Transcription initiation factor IIA subunit 2 OS=Homo sapiens OX=9606 GN=GTF2A2 PE=1 SV=1	sp|P52657|T2AG_HUMAN	1	3970	3970	1	665	665	1	12515	12500	1	4342	4340	1	1206	1210	1	6524	6520	1	3956	3960	1	8008	8010	1	1823	1820	1	5669	5670	1	9981	9980	1	3651	3650	1	1482	1480	1	707	707	1	1500	1500	1	689
P52732	Kinesin-like protein KIF11 OS=Homo sapiens OX=9606 GN=KIF11 PE=1 SV=2	sp|P52732|KIF11_HUMAN	2	15712	12500	2	64476	64500	2	26505	23400	2	6635	4710	2	8979	8980	2	41831	41800	2	13260	13300	2	10926	10900	2	16745	16700	2	26921	23400	2	24105	24100	2	10033	5320	2	22535	22500	2	17112	17100	2	23377	23400	2	26914
P52756	RNA-binding protein 5 OS=Homo sapiens OX=9606 GN=RBM5 PE=1 SV=2	sp|P52756|RBM5_HUMAN	2	24312	24300	2	19161	19200	2	22279	22300	2	10721	6310	2	8480	8480	2	18673	18700	2	15119	15100	2	18629	18600	2	14961	9900	2	16124	16100	2	14729	7810	2	20800	20800	2	22019	22000	2	15094	10300	2	15667	15700	2	16448
P52758	2-iminobutanoate/2-iminopropanoate deaminase OS=Homo sapiens OX=9606 GN=RIDA PE=1 SV=1	sp|P52758|RIDA_HUMAN	3	39723	13100	3	22885	15600	3	30546	30500	3	26030	17400	3	10675	10700	3	30943	30900	3	15989	14700	3	30042	26700	3	13103	13100	3	27076	27100	3	30179	11500	3	19513	17100	3	39216	23700	3	38537	22500	3	23431	23400	3	31468
P52788	Spermine synthase OS=Homo sapiens OX=9606 GN=SMS PE=1 SV=2	sp|P52788|SPSY_HUMAN	1	12706	12700	1	1612	1610	1	17847	17800	1	10888	10900	1	6177	6180	1	10535	10500	1	5423	5420	1	9501	9500	1	5179	5180	1	6533	6530	1	10717	10700	1	10676	10700	1	10048	10000	1	13643	13600	1	10488	10500	1	16354
P52789	Hexokinase-2 OS=Homo sapiens OX=9606 GN=HK2 PE=1 SV=2	sp|P52789|HXK2_HUMAN	12	157031	218000	12	120685	175000	12	154519	217000	12	81152	85100	12	54527	82000	12	137672	211000	12	87505	128000	12	86533	115000	12	127171	194000	12	146912	98700	12	178209	310000	12	97363	132000	12	86456	119000	12	126666	176000	12	102636	122000	12	108255
P52815	39S ribosomal protein L12, mitochondrial OS=Homo sapiens OX=9606 GN=MRPL12 PE=1 SV=2	sp|P52815|RM12_HUMAN	4	105927	106000	4	53581	48200	4	63071	63100	4	50657	50700	4	38009	38000	4	63069	63100	4	46566	46600	4	62714	62700	4	52967	53000	4	48127	42400	4	70851	65600	4	53731	53700	4	50064	50100	4	44731	44700	4	57074	51100	4	56315
P52848	Bifunctional heparan sulfate N-deacetylase/N-sulfotransferase 1 OS=Homo sapiens OX=9606 GN=NDST1 PE=1 SV=1	sp|P52848|NDST1_HUMAN	3	39268	39300	3	23715	23700	3	78347	71900	3	23948	2780	3	9748	8020	3	46133	21600	3	21619	21600	3	38665	38700	3	27208	10800	3	26396	26400	3	37963	36100	3	30265	12500	3	37772	37800	3	32465	32500	3	49028	49000	3	27496
P52888	Thimet oligopeptidase OS=Homo sapiens OX=9606 GN=THOP1 PE=1 SV=2	sp|P52888|THOP1_HUMAN	5	184346	297000	5	116644	178000	5	183022	264000	5	91759	133000	5	95688	143000	5	186586	254000	5	114375	161000	5	178683	273000	5	156294	232000	5	122248	160000	5	148660	214000	5	143620	199000	5	125418	164000	5	115157	155000	5	136295	218000	5	122296
P52895	Aldo-keto reductase family 1 member C2 OS=Homo sapiens OX=9606 GN=AKR1C2 PE=1 SV=3	sp|P52895|AK1C2_HUMAN	2	5241	5240	2	8557	8560	2	17456	17500	2	2979	2980	2	2791	2790	2	8207	8210	2	12633	832	2	11538	11500	2	2404	2400	2	15772	4480	2	12821	12800	2	6979	4650	2	5539	1180	2	2916	2920	2	12912	12900	2	9569
P52907	F-actin-capping protein subunit alpha-1 OS=Homo sapiens OX=9606 GN=CAPZA1 PE=1 SV=3	sp|P52907|CAZA1_HUMAN	9	1092257	1580000	9	595848	902000	9	1095339	1660000	9	687909	1060000	9	540941	829000	9	963243	1450000	9	641059	970000	9	932048	1420000	9	711743	1080000	9	846116	1250000	9	789378	1180000	9	960118	1450000	9	808416	1240000	9	789384	1220000	9	759477	1150000	9	911171
P53004	Biliverdin reductase A OS=Homo sapiens OX=9606 GN=BLVRA PE=1 SV=2	sp|P53004|BIEA_HUMAN	8	177524	54000	8	109463	76600	8	214306	90900	8	97120	58700	8	43124	35800	8	138219	99900	8	66773	31300	8	174448	58000	8	68746	35800	8	64940	50200	8	147431	48400	8	126525	109000	8	135728	56600	8	78286	34500	8	149677	46900	8	166644
P53007	Tricarboxylate transport protein, mitochondrial OS=Homo sapiens OX=9606 GN=SLC25A1 PE=1 SV=2	sp|P53007|TXTP_HUMAN	7	77959	71700	7	28963	28200	7	91088	85500	7	51642	43200	7	34876	27800	7	40520	40200	7	42442	41100	7	65203	53300	7	37132	27800	7	48360	34800	7	82143	47800	7	46506	39700	7	42477	35100	7	53878	53900	7	25082	25100	7	52735
P53041	Serine/threonine-protein phosphatase 5 OS=Homo sapiens OX=9606 GN=PPP5C PE=1 SV=1	sp|P53041|PPP5_HUMAN	6	188410	269000	6	176782	219000	6	274302	358000	6	149997	205000	6	160955	206000	6	280013	371000	6	217821	285000	6	213517	265000	6	170505	232000	6	298974	376000	6	194638	271000	6	228847	293000	6	175304	249000	6	206101	254000	6	223234	301000	6	260715
P53367	Arfaptin-1 OS=Homo sapiens OX=9606 GN=ARFIP1 PE=1 SV=2	sp|P53367|ARFP1_HUMAN	1	18601	#N/A	1	2506	#N/A	1	9157	#N/A	1	4909	#N/A	1	665	665	1	3692	#N/A	1	946	946	1	15592	15600	1	2743	2740	1	2433	2430	1	14293	#N/A	1	2073	2070	1	13126	#N/A	1	4837	#N/A	1	7242	#N/A	1	5103
P53396	ATP-citrate synthase OS=Homo sapiens OX=9606 GN=ACLY PE=1 SV=3	sp|P53396|ACLY_HUMAN	1	36924	36900	1	1477	1480	1	37443	37400	1	19026	19000	1	8059	#N/A	1	20084	20100	1	19662	#N/A	1	20380	20400	1	19159	19200	1	20993	#N/A	1	18581	18600	1	19497	#N/A	1	19791	19800	1	20284	20300	1	28715	28700	1	31374
P53582	Methionine aminopeptidase 1 OS=Homo sapiens OX=9606 GN=METAP1 PE=1 SV=2	sp|P53582|MAP11_HUMAN	10	217936	297000	10	129776	160000	10	253841	297000	10	169223	219000	10	99923	141000	10	194168	245000	10	159241	220000	10	217868	263000	10	166948	217000	10	190608	247000	10	180926	234000	10	205103	257000	10	189520	243000	10	126913	156000	10	133786	168000	10	217761
P53597	Succinate--CoA ligase [ADP/GDP-forming] subunit alpha, mitochondrial OS=Homo sapiens OX=9606 GN=SUCLG1 PE=1 SV=4	sp|P53597|SUCA_HUMAN	6	139613	183000	6	108283	160000	6	153422	116000	6	65337	33600	6	13468	4490	6	72026	60300	6	87272	119000	6	73955	77800	6	81982	132000	6	56650	20300	6	131532	143000	6	171618	325000	6	185565	280000	6	77924	48800	6	90417	137000	6	62379
P53602	Diphosphomevalonate decarboxylase OS=Homo sapiens OX=9606 GN=MVD PE=1 SV=1	sp|P53602|MVD1_HUMAN	6	238642	239000	6	43297	39100	6	335557	331000	6	156801	157000	6	218285	23300	6	334735	331000	6	57362	57400	6	201398	201000	6	347808	344000	6	147930	140000	6	69756	69800	6	265785	266000	6	57287	55100	6	70251	62500	6	70167	70200	6	208682
P53611	Geranylgeranyl transferase type-2 subunit beta OS=Homo sapiens OX=9606 GN=RABGGTB PE=1 SV=2	sp|P53611|PGTB2_HUMAN	2	61821	61800	2	28985	29000	2	51608	51600	2	32397	32400	2	16142	15900	2	51602	51300	2	35854	35400	2	38353	38400	2	31876	31900	2	30052	30100	2	32224	32200	2	39727	39700	2	31232	31200	2	37899	37900	2	42463	42500	2	53825
P53618	Coatomer subunit beta OS=Homo sapiens OX=9606 GN=COPB1 PE=1 SV=3	sp|P53618|COPB_HUMAN	37	1012589	1700000	37	675689	1170000	37	1544346	2460000	37	1021773	1690000	37	680235	1120000	37	1142853	1950000	37	929408	1520000	37	1123923	1870000	37	943685	1550000	37	1116299	1890000	37	959139	1630000	37	1108027	1910000	37	1088054	1850000	37	894370	1480000	37	964674	1570000	37	1146656
P53634	Dipeptidyl peptidase 1 OS=Homo sapiens OX=9606 GN=CTSC PE=1 SV=2	sp|P53634|CATC_HUMAN	4	43916	43900	4	24764	12100	4	73693	54200	4	27997	9070	4	17876	17900	4	52347	52300	4	21054	21100	4	100368	71600	4	46688	46700	4	48498	48500	4	52658	41400	4	16157	16200	4	40502	17600	4	33772	16900	4	35339	18300	4	37576
P53677	AP-3 complex subunit mu-2 OS=Homo sapiens OX=9606 GN=AP3M2 PE=2 SV=1	sp|P53677|AP3M2_HUMAN	1	30124	30100	1	3285	3280	1	32241	32200	1	20497	20500	1	14302	#N/A	1	17931	17900	1	20219	20200	1	20072	20100	1	17991	18000	1	21058	21100	1	19143	19100	1	20451	20500	1	23323	23300	1	2760	#N/A	1	3075	3080	1	25682
P53801	Pituitary tumor-transforming gene 1 protein-interacting protein OS=Homo sapiens OX=9606 GN=PTTG1IP PE=1 SV=1	sp|P53801|PTTG_HUMAN	2	80157	#N/A	2	30812	61600	2	58679	#N/A	2	23070	46100	2	26060	52100	2	46462	#N/A	2	25487	51000	2	30225	60500	2	24903	#N/A	2	29058	#N/A	2	25952	51900	2	24529	#N/A	2	28341	#N/A	2	28446	#N/A	2	39035	#N/A	2	35265
P53803	DNA-directed RNA polymerases I, II, and III subunit RPABC4 OS=Homo sapiens OX=9606 GN=POLR2K PE=1 SV=1	sp|P53803|RPAB4_HUMAN	1	8237	8240	1	14845	14800	1	28666	#N/A	1	17095	17100	1	1392	#N/A	1	2039	#N/A	1	2338	2340	1	15929	#N/A	1	4273	4270	1	3852	3850	1	7665	7670	1	4595	4600	1	2243	2240	1	2060	2060	1	6650	6650	1	6153
P53992	Protein transport protein Sec24C OS=Homo sapiens OX=9606 GN=SEC24C PE=1 SV=3	sp|P53992|SC24C_HUMAN	14	183353	120000	14	81819	89100	14	203776	219000	14	121305	135000	14	72413	80500	14	164979	182000	14	136158	157000	14	179116	174000	14	89010	98400	14	143311	177000	14	124298	136000	14	149607	158000	14	120015	117000	14	90975	84000	14	128929	119000	14	146658
P53999	Activated RNA polymerase II transcriptional coactivator p15 OS=Homo sapiens OX=9606 GN=SUB1 PE=1 SV=3	sp|P53999|TCP4_HUMAN	3	30416	30400	3	24827	24800	3	58945	58900	3	66612	51300	3	34129	34100	3	40705	27100	3	37195	37200	3	34564	28200	3	51505	34900	3	63610	63600	3	40590	40600	3	39526	39500	3	40650	40700	3	36949	36900	3	55683	55700	3	69048
P54105	Methylosome subunit pICln OS=Homo sapiens OX=9606 GN=CLNS1A PE=1 SV=1	sp|P54105|ICLN_HUMAN	2	44274	5900	2	26517	2880	2	15632	3590	2	13032	13000	2	7623	7620	2	12181	7780	2	9286	7450	2	17578	7770	2	13667	7990	2	30820	11100	2	37028	7230	2	21713	6740	2	7960	7960	2	14061	14100	2	19060	3790	2	20621
P54132	Bloom syndrome protein OS=Homo sapiens OX=9606 GN=BLM PE=1 SV=1	sp|P54132|BLM_HUMAN	1	3195	3190	1	4129	#N/A	1	5275	#N/A	1	3506	3510	1	1761	#N/A	1	8496	8500	1	4942	4940	1	1351	1350	1	2117	2120	1	5408	5410	1	1261	#N/A	1	1708	#N/A	1	5251	5250	1	3479	#N/A	1	3390	#N/A	1	4218
P54136	Arginine--tRNA ligase, cytoplasmic OS=Homo sapiens OX=9606 GN=RARS PE=1 SV=2	sp|P54136|SYRC_HUMAN	4	31365	51500	4	7448	11600	4	46351	78200	4	42354	57700	4	26557	46000	4	57797	87200	4	45004	64600	4	16994	30700	4	46467	65900	4	62845	94700	4	53523	80800	4	43325	71000	4	49731	72500	4	50563	74900	4	25600	39100	4	41349
P54577	Tyrosine--tRNA ligase, cytoplasmic OS=Homo sapiens OX=9606 GN=YARS PE=1 SV=4	sp|P54577|SYYC_HUMAN	19	377469	438000	19	179181	215000	19	461104	521000	19	272095	319000	19	248303	324000	19	381646	478000	19	306197	418000	19	405085	492000	19	270010	353000	19	367459	470000	19	474674	577000	19	477204	637000	19	523572	606000	19	361496	452000	19	341844	433000	19	374582
P54652	Heat shock-related 70 kDa protein 2 OS=Homo sapiens OX=9606 GN=HSPA2 PE=1 SV=1	sp|P54652|HSP72_HUMAN	6	351886	337000	6	55196	55200	6	199231	170000	6	134798	135000	6	73995	74000	6	293062	230000	6	85239	81700	6	161454	161000	6	109783	110000	6	117749	110000	6	113717	101000	6	85454	85500	6	116394	116000	6	141866	142000	6	132145	123000	6	160872
P54709	Sodium/potassium-transporting ATPase subunit beta-3 OS=Homo sapiens OX=9606 GN=ATP1B3 PE=1 SV=1	sp|P54709|AT1B3_HUMAN	3	145417	145000	3	80402	71500	3	148117	137000	3	80779	75100	3	78552	75200	3	103955	100000	3	119937	120000	3	144677	145000	3	192298	192000	3	248318	248000	3	210927	206000	3	131453	131000	3	93870	93900	3	120570	115000	3	107285	107000	3	125749
P54727	UV excision repair protein RAD23 homolog B OS=Homo sapiens OX=9606 GN=RAD23B PE=1 SV=1	sp|P54727|RD23B_HUMAN	3	53019	68500	3	16355	24100	3	35460	51400	3	36442	52900	3	13673	19400	3	28074	38400	3	23395	32200	3	46614	69200	3	19870	26100	3	34496	44600	3	46097	66600	3	44095	66100	3	33565	47500	3	34095	48900	3	35604	50800	3	30394
P54802	Alpha-N-acetylglucosaminidase OS=Homo sapiens OX=9606 GN=NAGLU PE=1 SV=2	sp|P54802|ANAG_HUMAN	7	102095	186000	7	41886	72700	7	102341	170000	7	94584	174000	7	52820	89900	7	82997	129000	7	71216	114000	7	89609	161000	7	80298	137000	7	89703	138000	7	91816	168000	7	92016	164000	7	67059	119000	7	69275	124000	7	49908	86100	7	84533
P54840	Glycogen [starch] synthase, liver OS=Homo sapiens OX=9606 GN=GYS2 PE=1 SV=2	sp|P54840|GYS2_HUMAN	1	10487	#N/A	1	3174	3170	1	7283	7280	1	2578	2580	1	1741	1740	1	5722	#N/A	1	4780	4780	1	3146	3150	1	3522	3520	1	1974	1970	1	4854	4850	1	2750	2750	1	3107	#N/A	1	5437	5440	1	1587	1590	1	2631
P54920	Alpha-soluble NSF attachment protein OS=Homo sapiens OX=9606 GN=NAPA PE=1 SV=3	sp|P54920|SNAA_HUMAN	15	291228	335000	15	239899	291000	15	479353	576000	15	333306	416000	15	218339	219000	15	429847	468000	15	328000	362000	15	408899	481000	15	364643	395000	15	383618	468000	15	375343	438000	15	408834	447000	15	479648	562000	15	374722	456000	15	326965	399000	15	364854
P55010	Eukaryotic translation initiation factor 5 OS=Homo sapiens OX=9606 GN=EIF5 PE=1 SV=2	sp|P55010|IF5_HUMAN	12	283656	267000	12	239890	263000	12	476774	466000	12	366833	407000	12	225056	260000	12	338023	395000	12	292172	355000	12	344795	362000	12	270477	324000	12	331715	423000	12	325160	323000	12	349170	421000	12	316311	288000	12	304208	289000	12	326141	352000	12	349662
P55036	26S proteasome non-ATPase regulatory subunit 4 OS=Homo sapiens OX=9606 GN=PSMD4 PE=1 SV=1	sp|P55036|PSMD4_HUMAN	2	44498	44500	2	36452	36500	2	72495	72500	2	44938	44900	2	30989	31000	2	61190	61200	2	45786	45800	2	45070	45100	2	49001	49000	2	54055	54100	2	50618	50600	2	52703	52700	2	50964	51000	2	39356	39400	2	39500	39500	2	59640
P55039	Developmentally-regulated GTP-binding protein 2 OS=Homo sapiens OX=9606 GN=DRG2 PE=1 SV=1	sp|P55039|DRG2_HUMAN	9	98486	94000	9	63228	60200	9	104585	78700	9	124108	121000	9	42713	41300	9	160999	156000	9	78831	78800	9	68840	65300	9	57977	52700	9	64769	47300	9	46564	36300	9	104832	102000	9	67038	51700	9	43839	35000	9	68890	65200	9	77603
P55072	Transitional endoplasmic reticulum ATPase OS=Homo sapiens OX=9606 GN=VCP PE=1 SV=4	sp|P55072|TERA_HUMAN	47	4051652	7020000	47	2662931	4500000	47	4607834	7520000	47	3958030	6670000	47	2434999	4290000	47	4179659	7120000	47	3682524	6350000	47	4298466	7300000	47	3459668	6150000	47	4280419	7490000	47	3827218	6580000	47	3694392	6420000	47	3601821	6040000	47	3990735	6960000	47	3362260	5810000	47	4139014
P55145	Mesencephalic astrocyte-derived neurotrophic factor OS=Homo sapiens OX=9606 GN=MANF PE=1 SV=3	sp|P55145|MANF_HUMAN	6	171603	172000	6	98308	86000	6	194755	171000	6	141229	150000	6	97868	105000	6	174171	178000	6	90657	86800	6	144384	150000	6	120563	131000	6	136644	143000	6	120342	125000	6	95170	105000	6	180639	186000	6	150906	133000	6	133862	124000	6	177218
P55268	Laminin subunit beta-2 OS=Homo sapiens OX=9606 GN=LAMB2 PE=1 SV=2	sp|P55268|LAMB2_HUMAN	22	239043	264000	22	185540	199000	22	215078	239000	22	160080	126000	22	100138	82100	22	235337	200000	22	147381	128000	22	188219	203000	22	141806	119000	22	175281	150000	22	210795	227000	22	190292	178000	22	160387	165000	22	158864	141000	22	191585	185000	22	223060
P55769	NHP2-like protein 1 OS=Homo sapiens OX=9606 GN=SNU13 PE=1 SV=3	sp|P55769|NH2L1_HUMAN	4	85866	109000	4	68021	84300	4	138287	163000	4	89843	112000	4	54862	62400	4	113965	144000	4	64833	77900	4	99034	118000	4	73262	88800	4	71019	75700	4	77709	90200	4	92504	94900	4	87622	102000	4	76814	88500	4	59310	63100	4	120115
P55795	Heterogeneous nuclear ribonucleoprotein H2 OS=Homo sapiens OX=9606 GN=HNRNPH2 PE=1 SV=1	sp|P55795|HNRH2_HUMAN	8	358637	460000	8	226911	308000	8	278285	354000	8	234491	322000	8	190124	251000	8	284287	381000	8	189607	249000	8	260441	335000	8	207081	283000	8	297090	409000	8	220150	290000	8	239027	318000	8	217334	282000	8	237892	314000	8	219236	288000	8	241258
P55809	Succinyl-CoA:3-ketoacid coenzyme A transferase 1, mitochondrial OS=Homo sapiens OX=9606 GN=OXCT1 PE=1 SV=1	sp|P55809|SCOT1_HUMAN	6	97682	134000	6	104089	157000	6	180156	214000	6	151915	205000	6	111137	160000	6	102791	142000	6	87981	119000	6	85947	130000	6	88119	114000	6	107193	141000	6	97677	130000	6	123870	162000	6	83262	116000	6	85481	95300	6	87531	125000	6	116925
P56181-2	Isoform 2 of NADH dehydrogenase [ubiquinone] flavoprotein 3, mitochondrial OS=Homo sapiens OX=9606 GN=NDUFV3	sp|P56181-2|NDUV3_HUMAN	4	42645	34700	4	55141	51500	4	76905	69900	4	39448	39400	4	9242	9240	4	76238	71000	4	27910	17400	4	34151	29300	4	19099	16800	4	28570	28600	4	44827	44800	4	44173	41700	4	41057	41100	4	42745	42700	4	41804	41800	4	57376
P56182	Ribosomal RNA processing protein 1 homolog A OS=Homo sapiens OX=9606 GN=RRP1 PE=1 SV=1	sp|P56182|RRP1_HUMAN	1	16218	16200	1	11232	11200	1	7211	7210	1	6325	6330	1	10062	10100	1	6124	6120	1	3177	3180	1	13707	#N/A	1	10727	10700	1	11227	11200	1	4527	4530	1	10627	10600	1	6691	6690	1	47006	47000	1	5607	5610	1	11103
P56192	Methionine--tRNA ligase, cytoplasmic OS=Homo sapiens OX=9606 GN=MARS PE=1 SV=2	sp|P56192|SYMC_HUMAN	5	68045	95200	5	76059	111000	5	134958	193000	5	73039	107000	5	68936	108000	5	94625	125000	5	84640	133000	5	100464	141000	5	70969	95100	5	100775	141000	5	110391	157000	5	76984	115000	5	94351	139000	5	69589	98100	5	111110	184000	5	98407
P56199	Integrin alpha-1 OS=Homo sapiens OX=9606 GN=ITGA1 PE=1 SV=2	sp|P56199|ITA1_HUMAN	6	66521	37900	6	16369	7870	6	44983	30400	6	28900	24500	6	120028	109000	6	35858	21400	6	21408	21400	6	34797	34800	6	205648	198000	6	184836	181000	6	39879	30300	6	48449	42700	6	171757	163000	6	36145	35400	6	167608	161000	6	112435
P56377	AP-1 complex subunit sigma-2 OS=Homo sapiens OX=9606 GN=AP1S2 PE=1 SV=1	sp|P56377|AP1S2_HUMAN	2	85784	#N/A	2	7498	15000	2	29151	58300	2	21948	43900	2	36285	72600	2	35763	71500	2	22215	44400	2	18243	36500	2	20631	41300	2	9339	18700	2	19002	38000	2	22839	45700	2	15598	31200	2	22796	45600	2	21640	43300	2	14732
P56385	ATP synthase subunit e, mitochondrial OS=Homo sapiens OX=9606 GN=ATP5I PE=1 SV=2	sp|P56385|ATP5I_HUMAN	5	175700	122000	5	96097	62900	5	199792	94000	5	113246	67800	5	44976	46100	5	133880	86100	5	115266	59200	5	146415	52600	5	110133	87500	5	109427	72500	5	163886	68800	5	112851	95000	5	159653	56200	5	207464	75200	5	155688	74200	5	163183
P56537	Eukaryotic translation initiation factor 6 OS=Homo sapiens OX=9606 GN=EIF6 PE=1 SV=1	sp|P56537|IF6_HUMAN	4	240511	438000	4	214550	447000	4	236827	463000	4	191178	407000	4	95293	176000	4	241094	482000	4	131450	263000	4	217596	423000	4	180106	378000	4	186389	359000	4	186455	371000	4	232604	474000	4	199283	402000	4	179088	375000	4	146122	278000	4	247847
P56556	NADH dehydrogenase [ubiquinone] 1 alpha subcomplex subunit 6 OS=Homo sapiens OX=9606 GN=NDUFA6 PE=1 SV=3	sp|P56556|NDUA6_HUMAN	1	1944	1940	1	784	784	1	899	899	1	443	443	1	665	665	1	605	605	1	392	392	1	756	756	1	274	274	1	277	277	1	540	540	1	499	499	1	1353	1350	1	453	453	1	494	494	1	683
P56589	Peroxisomal biogenesis factor 3 OS=Homo sapiens OX=9606 GN=PEX3 PE=1 SV=1	sp|P56589|PEX3_HUMAN	1	6586	6590	1	20694	20700	1	9536	9540	1	6596	6600	1	1124	1120	1	18555	18600	1	2544	2540	1	6578	6580	1	3928	3930	1	7287	7290	1	12176	12200	1	5414	5410	1	10569	10600	1	4162	4160	1	7157	7160	1	10762
P57088	Transmembrane protein 33 OS=Homo sapiens OX=9606 GN=TMEM33 PE=1 SV=2	sp|P57088|TMM33_HUMAN	4	128840	91300	4	111261	105000	4	239582	216000	4	148994	135000	4	102523	102000	4	187115	187000	4	158098	158000	4	218380	218000	4	171713	169000	4	241164	241000	4	182079	182000	4	167374	167000	4	205546	183000	4	178546	166000	4	141420	131000	4	153943
P57105	Synaptojanin-2-binding protein OS=Homo sapiens OX=9606 GN=SYNJ2BP PE=1 SV=2	sp|P57105|SYJ2B_HUMAN	3	37854	37900	3	40236	40200	3	46189	46200	3	34962	35000	3	16388	16400	3	21264	13800	3	12774	6610	3	16918	16900	3	24230	24200	3	22931	17800	3	26196	18000	3	26013	26000	3	37721	37700	3	26401	15400	3	28043	21100	3	39096
P57764	Gasdermin-D OS=Homo sapiens OX=9606 GN=GSDMD PE=1 SV=1	sp|P57764|GSDMD_HUMAN	3	36299	36300	3	37928	16100	3	56557	56600	3	60238	60200	3	26534	26500	3	39667	39700	3	51913	24700	3	48217	48200	3	41532	41500	3	23563	8100	3	44358	32300	3	28514	28500	3	30868	30900	3	25256	8460	3	32561	32600	3	57880
P58546	Myotrophin OS=Homo sapiens OX=9606 GN=MTPN PE=1 SV=2	sp|P58546|MTPN_HUMAN	2	155435	311000	2	74584	149000	2	188005	376000	2	144041	288000	2	75447	151000	2	159447	319000	2	125295	251000	2	163455	327000	2	136613	273000	2	122889	246000	2	121635	243000	2	186232	372000	2	172802	346000	2	148134	296000	2	134858	270000	2	150455
P59051	Putative uncharacterized protein encoded by BRWD1-AS2 OS=Homo sapiens OX=9606 GN=BRWD1-AS2 PE=5 SV=1	sp|P59051|BRAS2_HUMAN	1	9255	9250	1	7179	7180	1	20739	20700	1	6264	#N/A	1	24651	24700	1	13174	13200	1	16020	16000	1	174215	174000	1	7642	7640	1	24344	24300	1	13724	13700	1	12442	12400	1	10074	10100	1	11930	11900	1	11708	11700	1	18971
P60002	Transcription elongation factor 1 homolog OS=Homo sapiens OX=9606 GN=ELOF1 PE=1 SV=1	sp|P60002|ELOF1_HUMAN	2	8787	6550	2	1301	1300	2	11707	11700	2	6105	6100	2	1512	1510	2	3105	1440	2	3297	3300	2	4598	4600	2	3252	3250	2	5628	5630	2	3004	1480	2	12447	12400	2	6494	6490	2	10355	10400	2	5986	5990	2	6867
P60033	CD81 antigen OS=Homo sapiens OX=9606 GN=CD81 PE=1 SV=1	sp|P60033|CD81_HUMAN	5	260500	463000	5	88925	167000	5	268516	497000	5	160187	315000	5	247879	473000	5	457907	845000	5	302585	571000	5	542417	1010000	5	362052	684000	5	482201	905000	5	420006	778000	5	253277	469000	5	249818	465000	5	172567	319000	5	415577	788000	5	357009
P60059	Protein transport protein Sec61 subunit gamma OS=Homo sapiens OX=9606 GN=SEC61G PE=1 SV=1	sp|P60059|SC61G_HUMAN	1	107496	108000	1	71524	71500	1	185976	186000	1	117586	118000	1	86951	87000	1	142696	143000	1	126101	126000	1	143756	144000	1	124210	124000	1	161849	162000	1	105171	105000	1	131305	131000	1	160693	161000	1	161071	161000	1	113270	113000	1	164717
P60228	Eukaryotic translation initiation factor 3 subunit E OS=Homo sapiens OX=9606 GN=EIF3E PE=1 SV=1	sp|P60228|EIF3E_HUMAN	16	280215	306000	16	202599	231000	16	401665	459000	16	273303	348000	16	187045	207000	16	248059	269000	16	221431	229000	16	268449	310000	16	230562	264000	16	256263	276000	16	266714	325000	16	231214	257000	16	263685	307000	16	219013	262000	16	222469	222000	16	325712
P60468	Protein transport protein Sec61 subunit beta OS=Homo sapiens OX=9606 GN=SEC61B PE=1 SV=2	sp|P60468|SC61B_HUMAN	3	141058	141000	3	97542	97500	3	198160	198000	3	138556	139000	3	81769	81800	3	160537	161000	3	146121	146000	3	151978	152000	3	138005	138000	3	172399	172000	3	152405	152000	3	148421	148000	3	145653	146000	3	135735	136000	3	120925	121000	3	169713
P60510	Serine/threonine-protein phosphatase 4 catalytic subunit OS=Homo sapiens OX=9606 GN=PPP4C PE=1 SV=1	sp|P60510|PP4C_HUMAN	2	38044	38000	2	27100	24500	2	25862	19100	2	6828	6830	2	8943	2270	2	26946	5150	2	15596	11600	2	17112	17100	2	14261	6360	2	20262	7810	2	17437	17400	2	20436	14500	2	14689	14700	2	18653	18700	2	10739	10700	2	23730
P60520	Gamma-aminobutyric acid receptor-associated protein-like 2 OS=Homo sapiens OX=9606 GN=GABARAPL2 PE=1 SV=1	sp|P60520|GBRL2_HUMAN	1	11533	#N/A	1	2392	2390	1	6819	6820	1	4974	4970	1	1645	1650	1	4466	4470	1	1702	1700	1	3892	3890	1	3323	#N/A	1	3585	3580	1	8655	#N/A	1	7118	7120	1	9925	9920	1	3269	3270	1	4912	4910	1	9285
P60660	Myosin light polypeptide 6 OS=Homo sapiens OX=9606 GN=MYL6 PE=1 SV=2	sp|P60660|MYL6_HUMAN	4	98856	162000	4	71011	122000	4	202068	342000	4	167099	264000	4	162735	272000	4	162678	276000	4	180345	297000	4	163972	285000	4	116553	205000	4	187155	324000	4	185150	304000	4	176828	292000	4	179179	310000	4	196114	324000	4	169668	281000	4	205552
P60660-2	Isoform Smooth muscle of Myosin light polypeptide 6 OS=Homo sapiens OX=9606 GN=MYL6	sp|P60660-2|MYL6_HUMAN	3	67834	125000	3	48302	89700	3	58256	102000	3	83861	117000	3	30386	55700	3	157277	148000	3	48379	91900	3	49240	86500	3	63728	110000	3	67455	121000	3	86314	160000	3	140913	70000	3	43375	76300	3	47642	88700	3	44247	74800	3	39138
P60709	Actin, cytoplasmic 1 OS=Homo sapiens OX=9606 GN=ACTB PE=1 SV=1	sp|P60709|ACTB_HUMAN	3	76948	93900	3	36636	48300	3	101927	115000	3	67928	84100	3	33011	39400	3	39621	45600	3	40152	51800	3	32452	41700	3	35879	41700	3	39200	47100	3	56855	82400	3	37470	50200	3	60483	69700	3	50593	69700	3	32356	45500	3	50575
P60763	Ras-related C3 botulinum toxin substrate 3 OS=Homo sapiens OX=9606 GN=RAC3 PE=1 SV=1	sp|P60763|RAC3_HUMAN	1	4873	#N/A	1	8262	#N/A	1	15872	15900	1	6545	6540	1	4553	4550	1	14246	14200	1	5742	5740	1	15880	#N/A	1	6635	6640	1	6298	6300	1	7721	7720	1	12391	12400	1	5561	5560	1	14688	#N/A	1	12760	#N/A	1	8271
P60842	Eukaryotic initiation factor 4A-I OS=Homo sapiens OX=9606 GN=EIF4A1 PE=1 SV=1	sp|P60842|IF4A1_HUMAN	1	1183	1180	1	1883	1880	1	7624	7620	1	2327	2330	1	389	389	1	2536	2540	1	4217	4220	1	3897	3900	1	4527	4530	1	3774	3770	1	7655	7660	1	2216	2220	1	4313	4310	1	3738	3740	1	1629	1630	1	2622
P60900	Proteasome subunit alpha type-6 OS=Homo sapiens OX=9606 GN=PSMA6 PE=1 SV=1	sp|P60900|PSA6_HUMAN	2	144694	129000	2	107807	108000	2	173484	163000	2	99413	99400	2	63399	63400	2	119187	119000	2	86573	86600	2	130316	130000	2	110120	106000	2	111496	112000	2	118161	118000	2	131728	128000	2	116820	117000	2	100051	100000	2	119144	119000	2	142319
P60903	Protein S100-A10 OS=Homo sapiens OX=9606 GN=S100A10 PE=1 SV=2	sp|P60903|S10AA_HUMAN	6	178178	356000	6	296017	546000	6	509977	1020000	6	381331	733000	6	265446	531000	6	855290	1710000	6	231280	413000	6	563049	1130000	6	305465	554000	6	314601	629000	6	365234	730000	6	431666	863000	6	532360	1060000	6	237729	475000	6	292607	585000	6	582274
P60953	Cell division control protein 42 homolog OS=Homo sapiens OX=9606 GN=CDC42 PE=1 SV=2	sp|P60953|CDC42_HUMAN	2	169487	339000	2	124819	250000	2	250905	502000	2	342580	685000	2	203533	407000	2	255491	511000	2	210519	421000	2	210796	422000	2	167319	335000	2	221735	443000	2	250658	501000	2	162758	326000	2	264470	529000	2	190101	380000	2	169488	339000	2	255534
P60981	Destrin OS=Homo sapiens OX=9606 GN=DSTN PE=1 SV=3	sp|P60981|DEST_HUMAN	2	383017	379000	2	183421	183000	2	245861	246000	2	152179	152000	2	123170	123000	2	234595	235000	2	128325	128000	2	178606	179000	2	138207	138000	2	168396	168000	2	136696	137000	2	192163	191000	2	160547	161000	2	111646	112000	2	155922	156000	2	202347
P60983	Glia maturation factor beta OS=Homo sapiens OX=9606 GN=GMFB PE=1 SV=2	sp|P60983|GMFB_HUMAN	3	47350	47400	3	53037	47000	3	119209	119000	3	56910	56900	3	16765	15900	3	82121	78400	3	73226	72000	3	76963	77000	3	71423	65400	3	80030	74100	3	69862	69900	3	82564	79000	3	69376	69400	3	57579	57600	3	55712	55700	3	95498
P61006	Ras-related protein Rab-8A OS=Homo sapiens OX=9606 GN=RAB8A PE=1 SV=1	sp|P61006|RAB8A_HUMAN	2	61513	123000	2	77709	155000	2	76496	153000	2	71952	144000	2	51555	103000	2	86344	173000	2	72974	146000	2	110110	220000	2	70831	142000	2	69837	140000	2	85204	170000	2	78491	157000	2	54546	109000	2	66269	133000	2	57878	116000	2	115280
P61009	Signal peptidase complex subunit 3 OS=Homo sapiens OX=9606 GN=SPCS3 PE=1 SV=1	sp|P61009|SPCS3_HUMAN	2	53429	53400	2	20587	17700	2	47078	47100	2	22111	18600	2	24074	24100	2	23922	17000	2	33088	33100	2	32058	32100	2	32962	33000	2	35111	35100	2	25227	25200	2	25432	25400	2	26081	26100	2	24574	24600	2	30783	30800	2	23360
P61020	Ras-related protein Rab-5B OS=Homo sapiens OX=9606 GN=RAB5B PE=1 SV=1	sp|P61020|RAB5B_HUMAN	4	80163	143000	4	47735	83400	4	53830	94200	4	53731	89200	4	38936	65400	4	65593	115000	4	64932	105000	4	80735	140000	4	47648	81200	4	75092	132000	4	78823	128000	4	73889	134000	4	65525	115000	4	62058	110000	4	64977	111000	4	53798
P61026	Ras-related protein Rab-10 OS=Homo sapiens OX=9606 GN=RAB10 PE=1 SV=1	sp|P61026|RAB10_HUMAN	5	332899	347000	5	240242	247000	5	390434	376000	5	230850	239000	5	196256	204000	5	357406	372000	5	302725	291000	5	354422	366000	5	288812	293000	5	377195	363000	5	417041	407000	5	314014	300000	5	347317	335000	5	324083	331000	5	289618	300000	5	349767
P61081	NEDD8-conjugating enzyme Ubc12 OS=Homo sapiens OX=9606 GN=UBE2M PE=1 SV=1	sp|P61081|UBC12_HUMAN	5	200281	182000	5	144315	86300	5	239929	144000	5	158718	88700	5	53626	50500	5	176304	102000	5	103624	81900	5	181185	118000	5	100144	87000	5	104979	102000	5	176367	112000	5	109875	109000	5	149450	93900	5	143797	91600	5	153087	88400	5	165305
P61088	Ubiquitin-conjugating enzyme E2 N OS=Homo sapiens OX=9606 GN=UBE2N PE=1 SV=1	sp|P61088|UBE2N_HUMAN	6	122870	77200	6	87603	88700	6	163031	178000	6	120840	130000	6	67135	35100	6	146787	152000	6	96863	104000	6	115521	123000	6	100108	103000	6	120364	129000	6	122765	134000	6	103031	107000	6	111230	116000	6	141228	143000	6	97260	99700	6	156407
P61106	Ras-related protein Rab-14 OS=Homo sapiens OX=9606 GN=RAB14 PE=1 SV=4	sp|P61106|RAB14_HUMAN	11	436756	473000	11	225031	120000	11	462051	473000	11	262886	141000	11	90064	49300	11	211945	133000	11	189757	82400	11	377721	267000	11	156193	70300	11	172848	112000	11	332704	225000	11	160391	135000	11	337380	159000	11	355743	245000	11	282556	180000	11	320357
P61158	Actin-related protein 3 OS=Homo sapiens OX=9606 GN=ACTR3 PE=1 SV=3	sp|P61158|ARP3_HUMAN	21	3080363	4740000	21	1538658	2310000	21	3942757	5970000	21	2395365	3570000	21	1597127	2400000	21	3018701	4590000	21	2237531	3340000	21	2912831	4450000	21	2207869	3370000	21	2616578	3970000	21	2430936	3730000	21	2561442	3870000	21	2795071	4250000	21	3058418	4670000	21	2463016	3770000	21	3027084
P61163	Alpha-centractin OS=Homo sapiens OX=9606 GN=ACTR1A PE=1 SV=1	sp|P61163|ACTZ_HUMAN	8	381768	551000	8	234075	304000	8	543826	752000	8	377467	519000	8	300815	419000	8	445403	583000	8	420198	611000	8	501542	698000	8	416291	578000	8	483087	671000	8	420923	590000	8	409186	569000	8	433373	584000	8	384522	539000	8	368113	539000	8	427423
P61165	Transmembrane protein 258 OS=Homo sapiens OX=9606 GN=TMEM258 PE=1 SV=1	sp|P61165|TM258_HUMAN	1	18532	18500	1	10274	10300	1	21572	21600	1	11702	11700	1	2969	2970	1	1902	1900	1	4049	4050	1	2130	2130	1	886	886	1	13589	#N/A	1	11439	11400	1	9627	#N/A	1	4761	4760	1	5428	5430	1	13534	#N/A	1	2506
P61218	DNA-directed RNA polymerases I, II, and III subunit RPABC2 OS=Homo sapiens OX=9606 GN=POLR2F PE=1 SV=1	sp|P61218|RPAB2_HUMAN	1	3326	#N/A	1	989	989	1	8436	8440	1	1959	1960	1	2553	#N/A	1	1779	1780	1	1135	1130	1	2195	#N/A	1	3165	3170	1	1123	1120	1	4482	4480	1	2023	2020	1	1557	1560	1	2445	2440	1	1961	1960	1	1598
P61221	ATP-binding cassette sub-family E member 1 OS=Homo sapiens OX=9606 GN=ABCE1 PE=1 SV=1	sp|P61221|ABCE1_HUMAN	17	350203	381000	17	266458	336000	17	415097	521000	17	266143	339000	17	202978	251000	17	376038	475000	17	291079	371000	17	745147	845000	17	323447	414000	17	693989	780000	17	710421	799000	17	648333	742000	17	524441	606000	17	282807	350000	17	605842	685000	17	756775
P61225	Ras-related protein Rap-2b OS=Homo sapiens OX=9606 GN=RAP2B PE=1 SV=1	sp|P61225|RAP2B_HUMAN	1	12784	12800	1	10008	10000	1	18595	18600	1	17248	17200	1	6792	6790	1	11834	11800	1	4040	4040	1	13557	13600	1	12051	12100	1	15168	15200	1	13899	13900	1	9857	9860	1	6980	6980	1	13894	13900	1	10914	10900	1	16028
P61247	40S ribosomal protein S3a OS=Homo sapiens OX=9606 GN=RPS3A PE=1 SV=2	sp|P61247|RS3A_HUMAN	19	1106070	1270000	19	1109618	1340000	19	2212397	2680000	19	1365062	1670000	19	842940	1040000	19	1605513	1960000	19	1173040	1430000	19	1524451	1870000	19	1368916	1660000	19	1525496	1840000	19	1367512	1690000	19	1614723	1940000	19	1359003	1690000	19	1224149	1530000	19	1215523	1460000	19	1992791
P61254	60S ribosomal protein L26 OS=Homo sapiens OX=9606 GN=RPL26 PE=1 SV=1	sp|P61254|RL26_HUMAN	1	2289	2290	1	1363	1360	1	489	489	1	4460	4460	1	443	443	1	568	568	1	2774	2770	1	4591	4590	1	2979	2980	1	352	#N/A	1	724	724	1	510	510	1	524	524	1	449	449	1	544	544	1	1264
P61313	60S ribosomal protein L15 OS=Homo sapiens OX=9606 GN=RPL15 PE=1 SV=2	sp|P61313|RL15_HUMAN	4	26923	26900	4	30609	15800	4	87615	12300	4	53065	17200	4	14174	14200	4	44494	10900	4	31597	6250	4	67133	67100	4	33601	14400	4	28715	6220	4	41932	8410	4	15678	15700	4	68160	15400	4	49629	49600	4	56421	21300	4	59254
P61353	60S ribosomal protein L27 OS=Homo sapiens OX=9606 GN=RPL27 PE=1 SV=2	sp|P61353|RL27_HUMAN	4	258940	314000	4	537943	642000	4	988850	1180000	4	649192	764000	4	374894	434000	4	830938	962000	4	529644	609000	4	696584	815000	4	607325	709000	4	655740	769000	4	579275	676000	4	737616	874000	4	662076	760000	4	534183	607000	4	590827	695000	4	863187
P61421	V-type proton ATPase subunit d 1 OS=Homo sapiens OX=9606 GN=ATP6V0D1 PE=1 SV=1	sp|P61421|VA0D1_HUMAN	5	41250	34100	5	25625	12400	5	81667	81700	5	40134	33000	5	38904	38900	5	30501	19200	5	41813	34900	5	49788	44800	5	36872	26600	5	47369	41800	5	45410	45400	5	38725	34500	5	44202	41500	5	33202	33200	5	38980	37300	5	44639
P61513	60S ribosomal protein L37a OS=Homo sapiens OX=9606 GN=RPL37A PE=1 SV=2	sp|P61513|RL37A_HUMAN	6	95113	190000	6	80495	161000	6	93178	186000	6	170330	341000	6	58467	29900	6	150495	301000	6	117269	235000	6	61624	64100	6	66958	45700	6	141437	283000	6	134747	268000	6	59109	64200	6	185510	371000	6	210881	422000	6	167171	334000	6	128641
P61586	Transforming protein RhoA OS=Homo sapiens OX=9606 GN=RHOA PE=1 SV=1	sp|P61586|RHOA_HUMAN	3	568323	568000	3	282784	283000	3	566720	567000	3	433181	432000	3	229051	229000	3	484734	485000	3	301518	302000	3	509665	510000	3	366123	366000	3	430196	430000	3	408870	409000	3	371974	372000	3	332540	333000	3	301300	301000	3	358832	359000	3	473696
P61587	Rho-related GTP-binding protein RhoE OS=Homo sapiens OX=9606 GN=RND3 PE=1 SV=1	sp|P61587|RND3_HUMAN	6	81668	72900	6	95663	95700	6	59590	43600	6	45051	45100	6	62638	58700	6	50948	45100	6	39931	32900	6	48479	33400	6	92616	92600	6	117330	117000	6	84795	79600	6	130031	122000	6	35529	33000	6	42582	42600	6	86779	86800	6	126708
P61599	N-alpha-acetyltransferase 20 OS=Homo sapiens OX=9606 GN=NAA20 PE=1 SV=1	sp|P61599|NAA20_HUMAN	1	11091	#N/A	1	11164	11200	1	6057	6060	1	2095	#N/A	1	2854	2850	1	3940	#N/A	1	3088	3090	1	24295	24300	1	10856	10900	1	14420	14400	1	10486	10500	1	2901	#N/A	1	2348	2350	1	4535	#N/A	1	2862	#N/A	1	4306
P61604	10 kDa heat shock protein, mitochondrial OS=Homo sapiens OX=9606 GN=HSPE1 PE=1 SV=2	sp|P61604|CH10_HUMAN	5	764649	765000	5	541527	542000	5	1192242	1190000	5	776654	777000	5	410592	411000	5	1012094	1010000	5	689662	690000	5	868146	868000	5	678807	679000	5	696859	697000	5	848853	849000	5	1009962	1010000	5	761944	762000	5	781395	778000	5	646702	647000	5	905196
P61619	Protein transport protein Sec61 subunit alpha isoform 1 OS=Homo sapiens OX=9606 GN=SEC61A1 PE=1 SV=2	sp|P61619|S61A1_HUMAN	2	120968	242000	2	90684	181000	2	266151	532000	2	126472	253000	2	132724	265000	2	206990	414000	2	167076	334000	2	217328	435000	2	184992	370000	2	288323	577000	2	176887	354000	2	170410	341000	2	225773	452000	2	240686	481000	2	199712	399000	2	217432
P61758	Prefoldin subunit 3 OS=Homo sapiens OX=9606 GN=VBP1 PE=1 SV=3	sp|P61758|PFD3_HUMAN	3	92901	82300	3	55983	50000	3	99533	99500	3	66936	66900	3	48088	46600	3	93387	93400	3	67415	61500	3	83516	81100	3	69093	69100	3	75845	75800	3	77757	74700	3	72819	72800	3	70819	70800	3	52024	52000	3	57194	53700	3	87866
P61769	Beta-2-microglobulin OS=Homo sapiens OX=9606 GN=B2M PE=1 SV=1	sp|P61769|B2MG_HUMAN	3	58635	111000	3	42298	81000	3	34026	62600	3	59766	118000	3	31254	59700	3	96131	188000	3	53148	104000	3	116560	227000	3	82880	163000	3	99035	193000	3	98291	191000	3	52520	104000	3	76105	149000	3	55565	106000	3	83381	164000	3	96972
P61803	Dolichyl-diphosphooligosaccharide--protein glycosyltransferase subunit DAD1 OS=Homo sapiens OX=9606 GN=DAD1 PE=1 SV=3	sp|P61803|DAD1_HUMAN	3	93050	93100	3	60260	60300	3	154498	155000	3	111419	111000	3	79662	79700	3	152858	153000	3	122209	122000	3	175384	175000	3	120655	121000	3	153746	154000	3	130328	130000	3	120028	120000	3	124144	124000	3	135302	135000	3	112421	112000	3	132200
P61960	Ubiquitin-fold modifier 1 OS=Homo sapiens OX=9606 GN=UFM1 PE=1 SV=1	sp|P61960|UFM1_HUMAN	2	150322	301000	2	131594	263000	2	264532	529000	2	176469	353000	2	146194	292000	2	241453	483000	2	173970	348000	2	234586	469000	2	202925	406000	2	225092	450000	2	238928	478000	2	214956	430000	2	208365	417000	2	222775	446000	2	172999	346000	2	235675
P61962	DDB1- and CUL4-associated factor 7 OS=Homo sapiens OX=9606 GN=DCAF7 PE=1 SV=1	sp|P61962|DCAF7_HUMAN	4	73884	73900	4	45209	45200	4	50780	50800	4	37418	29200	4	29016	29000	4	35757	35800	4	42283	42300	4	33373	31700	4	42574	42600	4	51256	51300	4	66018	66000	4	70695	70700	4	48285	48300	4	36814	36800	4	27657	27400	4	30678
P61964	WD repeat-containing protein 5 OS=Homo sapiens OX=9606 GN=WDR5 PE=1 SV=1	sp|P61964|WDR5_HUMAN	4	62538	62500	4	31329	12900	4	66393	60100	4	32313	22800	4	7552	7550	4	41887	41900	4	22574	19900	4	53730	53700	4	29976	21000	4	40055	40100	4	51437	51400	4	36340	33500	4	45287	45300	4	23938	16800	4	35612	23100	4	54485
P61966	AP-1 complex subunit sigma-1A OS=Homo sapiens OX=9606 GN=AP1S1 PE=1 SV=1	sp|P61966|AP1S1_HUMAN	2	25097	50200	2	5262	10500	2	48457	96900	2	9360	18700	2	6011	12000	2	15786	31600	2	14595	29200	2	16459	32900	2	13946	27900	2	26472	52900	2	11528	23100	2	6658	13300	2	11335	22700	2	22390	44800	2	8039	16100	2	10824
P61970	Nuclear transport factor 2 OS=Homo sapiens OX=9606 GN=NUTF2 PE=1 SV=1	sp|P61970|NTF2_HUMAN	5	274098	291000	5	119424	132000	5	216937	228000	5	162881	191000	5	119283	130000	5	227465	275000	5	146126	161000	5	181747	202000	5	161148	179000	5	210044	234000	5	188766	213000	5	195391	208000	5	197168	212000	5	187203	206000	5	186532	214000	5	237579
P61978-3	Isoform 3 of Heterogeneous nuclear ribonucleoprotein K OS=Homo sapiens OX=9606 GN=HNRNPK	sp|P61978-3|HNRPK_HUMAN	1	2626	2630	1	4989	4990	1	4071	4070	1	3058	#N/A	1	1330	1330	1	2141	2140	1	2964	2960	1	6492	6490	1	4564	#N/A	1	7139	7140	1	4214	4210	1	3267	3270	1	2343	2340	1	1734	1730	1	1802	#N/A	1	2288
P61981	14-3-3 protein gamma OS=Homo sapiens OX=9606 GN=YWHAG PE=1 SV=2	sp|P61981|1433G_HUMAN	10	386716	517000	10	261525	392000	10	536194	730000	10	383602	576000	10	295657	444000	10	406298	574000	10	385745	572000	10	425265	604000	10	367043	512000	10	513341	780000	10	416286	610000	10	391167	506000	10	416724	572000	10	422728	606000	10	399361	579000	10	447246
P62072	Mitochondrial import inner membrane translocase subunit Tim10 OS=Homo sapiens OX=9606 GN=TIMM10 PE=1 SV=1	sp|P62072|TIM10_HUMAN	1	2520	2520	1	3679	3680	1	5478	5480	1	5003	5000	1	2998	3000	1	2119	2120	1	3326	3330	1	3829	3830	1	3664	3660	1	1887	1890	1	2510	2510	1	1477	1480	1	1222	1220	1	2913	2910	1	1964	1960	1	3728
P62081	40S ribosomal protein S7 OS=Homo sapiens OX=9606 GN=RPS7 PE=1 SV=1	sp|P62081|RS7_HUMAN	12	1017643	1410000	12	1084035	1670000	12	925980	1610000	12	1248505	2220000	12	763496	1360000	12	1366194	2160000	12	993148	1570000	12	1280501	1940000	12	1091997	1730000	12	1327082	2140000	12	1158494	1800000	12	1176992	1860000	12	1320620	2090000	12	953263	1370000	12	936537	1440000	12	1526509
P62136	Serine/threonine-protein phosphatase PP1-alpha catalytic subunit OS=Homo sapiens OX=9606 GN=PPP1CA PE=1 SV=1	sp|P62136|PP1A_HUMAN	1	5838	5840	1	697	697	1	7377	7380	1	3992	3990	1	2064	2060	1	5970	5970	1	3519	3520	1	3708	3710	1	3340	3340	1	2419	2420	1	3329	3330	1	2229	2230	1	4362	4360	1	2330	2330	1	3324	3320	1	6401
P62140	Serine/threonine-protein phosphatase PP1-beta catalytic subunit OS=Homo sapiens OX=9606 GN=PPP1CB PE=1 SV=3	sp|P62140|PP1B_HUMAN	5	91315	88300	5	50274	51600	5	93786	91200	5	74745	76300	5	59284	65700	5	100929	108000	5	82600	87700	5	106062	101000	5	69472	66300	5	114008	118000	5	60033	64700	5	85096	83500	5	71933	79300	5	36344	40100	5	83389	86000	5	107725
P62191	26S proteasome regulatory subunit 4 OS=Homo sapiens OX=9606 GN=PSMC1 PE=1 SV=1	sp|P62191|PRS4_HUMAN	1	2197	2200	1	558	558	1	946	946	1	3663	3660	1	549	#N/A	1	752	752	1	1773	1770	1	614	614	1	789	789	1	989	989	1	507	507	1	2777	2780	1	1939	1940	1	762	762	1	1983	1980	1	454
P62241	40S ribosomal protein S8 OS=Homo sapiens OX=9606 GN=RPS8 PE=1 SV=2	sp|P62241|RS8_HUMAN	14	909145	1370000	14	762514	1100000	14	1818547	2600000	14	1167577	1690000	14	627718	894000	14	1495600	2150000	14	942928	1340000	14	1334117	1880000	14	1018269	1450000	14	1265717	1830000	14	1164205	1640000	14	1245413	1830000	14	1139912	1620000	14	1130633	1610000	14	1003430	1460000	14	1427525
P62244	40S ribosomal protein S15a OS=Homo sapiens OX=9606 GN=RPS15A PE=1 SV=2	sp|P62244|RS15A_HUMAN	12	950619	1040000	12	1225222	1370000	12	2329342	2760000	12	1555350	1840000	12	906394	1100000	12	1828796	2120000	12	1299190	1560000	12	1633069	2000000	12	1418853	1670000	12	1515546	1790000	12	1357283	1680000	12	1705688	2110000	12	1493235	1880000	12	1217176	1540000	12	1305003	1490000	12	1971200
P62249	40S ribosomal protein S16 OS=Homo sapiens OX=9606 GN=RPS16 PE=1 SV=2	sp|P62249|RS16_HUMAN	7	703267	728000	7	519742	506000	7	1127390	1180000	7	618300	609000	7	456738	456000	7	759678	752000	7	669283	671000	7	793278	837000	7	670518	685000	7	796514	799000	7	682615	657000	7	764058	762000	7	785383	817000	7	697420	680000	7	686283	677000	7	1002629
P62258	14-3-3 protein epsilon OS=Homo sapiens OX=9606 GN=YWHAE PE=1 SV=1	sp|P62258|1433E_HUMAN	1	6131	6130	1	3348	3350	1	13062	13100	1	10404	10400	1	2323	2320	1	5381	5380	1	7756	7760	1	11590	11600	1	6784	6780	1	10689	10700	1	4014	4010	1	7897	7900	1	7333	7330	1	2549	2550	1	3259	3260	1	8819
P62263	40S ribosomal protein S14 OS=Homo sapiens OX=9606 GN=RPS14 PE=1 SV=3	sp|P62263|RS14_HUMAN	3	147930	148000	3	96535	94400	3	228969	229000	3	128858	129000	3	78106	78100	3	164435	164000	3	105885	106000	3	131734	129000	3	120740	121000	3	128463	128000	3	119640	120000	3	142350	142000	3	156363	156000	3	123034	123000	3	117882	118000	3	168145
P62266	40S ribosomal protein S23 OS=Homo sapiens OX=9606 GN=RPS23 PE=1 SV=3	sp|P62266|RS23_HUMAN	4	434271	477000	4	387820	429000	4	582941	618000	4	478802	554000	4	306140	348000	4	616058	671000	4	448168	506000	4	564342	617000	4	522770	562000	4	574983	659000	4	500602	573000	4	552993	581000	4	456888	509000	4	469178	530000	4	479971	527000	4	674472
P62269	40S ribosomal protein S18 OS=Homo sapiens OX=9606 GN=RPS18 PE=1 SV=3	sp|P62269|RS18_HUMAN	9	943621	941000	9	1005480	1000000	9	1947842	1950000	9	1162463	1160000	9	701069	701000	9	1652190	1650000	9	1025313	1030000	9	2167296	2170000	9	1218449	1220000	9	1846212	1850000	9	1514926	1510000	9	1427523	1430000	9	1419058	1420000	9	1007120	1010000	9	1556661	1560000	9	1634661
P62277	40S ribosomal protein S13 OS=Homo sapiens OX=9606 GN=RPS13 PE=1 SV=2	sp|P62277|RS13_HUMAN	7	811529	812000	7	899449	899000	7	1668513	1670000	7	1038413	1040000	7	586886	587000	7	1268037	1270000	7	864411	864000	7	1153694	1150000	7	969834	970000	7	1063369	1060000	7	993013	993000	7	1222714	1220000	7	1049868	1050000	7	809845	810000	7	908580	909000	7	1345470
P62280	40S ribosomal protein S11 OS=Homo sapiens OX=9606 GN=RPS11 PE=1 SV=3	sp|P62280|RS11_HUMAN	10	508854	754000	10	359412	571000	10	717033	1180000	10	483015	786000	10	260228	423000	10	550606	908000	10	387914	626000	10	501175	787000	10	440725	719000	10	472362	769000	10	468150	746000	10	516326	826000	10	430564	703000	10	390323	647000	10	382515	606000	10	602945
P62304	Small nuclear ribonucleoprotein E OS=Homo sapiens OX=9606 GN=SNRPE PE=1 SV=1	sp|P62304|RUXE_HUMAN	6	468663	485000	6	418060	437000	6	597635	647000	6	443550	473000	6	278425	315000	6	599841	634000	6	423137	465000	6	540321	579000	6	469665	502000	6	509898	556000	6	468783	493000	6	520696	545000	6	438716	464000	6	405618	435000	6	460958	504000	6	592343
P62306	Small nuclear ribonucleoprotein F OS=Homo sapiens OX=9606 GN=SNRPF PE=1 SV=1	sp|P62306|RUXF_HUMAN	1	33767	33800	1	27470	27500	1	43625	43600	1	32371	32400	1	18873	18900	1	40072	40100	1	20862	20900	1	35000	35000	1	23942	23900	1	24440	24400	1	29787	29800	1	39535	39500	1	22163	22200	1	16332	16300	1	25278	25300	1	35000
P62310	U6 snRNA-associated Sm-like protein LSm3 OS=Homo sapiens OX=9606 GN=LSM3 PE=1 SV=2	sp|P62310|LSM3_HUMAN	1	6728	6730	1	11197	11200	1	12476	12500	1	4767	4770	1	2902	2900	1	17054	17100	1	11201	11200	1	18001	18000	1	6809	#N/A	1	11269	11300	1	10303	10300	1	13121	13100	1	17851	17900	1	2739	#N/A	1	4248	4250	1	16036
P62312	U6 snRNA-associated Sm-like protein LSm6 OS=Homo sapiens OX=9606 GN=LSM6 PE=1 SV=1	sp|P62312|LSM6_HUMAN	6	14942	16800	6	16407	6470	6	16236	12500	6	9036	9780	6	4148	4770	6	14342	15300	6	8960	5060	6	24256	31600	6	11219	12400	6	10852	12300	6	14991	10400	6	14594	7090	6	6767	4900	6	9673	11200	6	10943	8650	6	12659
P62314	Small nuclear ribonucleoprotein Sm D1 OS=Homo sapiens OX=9606 GN=SNRPD1 PE=1 SV=1	sp|P62314|SMD1_HUMAN	5	77378	152000	5	78786	150000	5	167250	318000	5	130758	255000	5	67588	125000	5	131888	250000	5	115733	221000	5	92864	183000	5	81436	153000	5	132270	251000	5	176132	337000	5	97957	184000	5	104195	198000	5	67593	131000	5	80070	151000	5	115202
P62330	ADP-ribosylation factor 6 OS=Homo sapiens OX=9606 GN=ARF6 PE=1 SV=2	sp|P62330|ARF6_HUMAN	6	154260	167000	6	89958	103000	6	197907	222000	6	157330	169000	6	149379	136000	6	201998	227000	6	164727	169000	6	207370	235000	6	176234	201000	6	221804	209000	6	184709	193000	6	153235	156000	6	187118	202000	6	214334	227000	6	193047	207000	6	219026
P62333	26S proteasome regulatory subunit 10B OS=Homo sapiens OX=9606 GN=PSMC6 PE=1 SV=1	sp|P62333|PRS10_HUMAN	21	867456	1270000	21	647177	982000	21	1005742	1480000	21	689810	1010000	21	482056	745000	21	944763	1330000	21	638501	915000	21	805467	1140000	21	704514	995000	21	755626	1110000	21	735608	1050000	21	772420	1130000	21	809125	1240000	21	689057	1010000	21	673959	992000	21	868489
P62341	Thioredoxin reductase-like selenoprotein T OS=Homo sapiens OX=9606 GN=SELENOT PE=1 SV=2	sp|P62341|SELT_HUMAN	2	18759	18800	2	11833	11800	2	13674	13700	2	13803	1940	2	5824	887	2	14524	#N/A	2	13002	2330	2	13644	13600	2	10967	#N/A	2	10648	9000	2	16131	4310	2	4442	1070	2	9960	9960	2	11598	11600	2	7238	4930	2	17139
P62380	TATA box-binding protein-like protein 1 OS=Homo sapiens OX=9606 GN=TBPL1 PE=1 SV=1	sp|P62380|TBPL1_HUMAN	2	36554	36600	2	20123	14400	2	35802	#N/A	2	32898	32900	2	8760	4550	2	35853	35900	2	31144	#N/A	2	26349	7830	2	32059	10700	2	33673	#N/A	2	29780	29800	2	22156	8160	2	20508	20500	2	22900	22900	2	19707	7610	2	50576
P62424	60S ribosomal protein L7a OS=Homo sapiens OX=9606 GN=RPL7A PE=1 SV=2	sp|P62424|RL7A_HUMAN	8	575469	596000	8	537027	522000	8	1019293	993000	8	662385	651000	8	363780	374000	8	780428	805000	8	557852	597000	8	727806	756000	8	615282	628000	8	753479	766000	8	603801	629000	8	676678	683000	8	612678	597000	8	576015	591000	8	549658	535000	8	734706
P62487	DNA-directed RNA polymerase II subunit RPB7 OS=Homo sapiens OX=9606 GN=POLR2G PE=1 SV=1	sp|P62487|RPB7_HUMAN	2	25128	25100	2	18035	18000	2	18625	18600	2	17790	17800	2	11452	11500	2	15828	15800	2	23879	23900	2	13016	8740	2	14452	14500	2	21728	12900	2	25058	25100	2	12101	8500	2	10885	10900	2	19003	19000	2	20579	20600	2	17756
P62701	40S ribosomal protein S4, X isoform OS=Homo sapiens OX=9606 GN=RPS4X PE=1 SV=2	sp|P62701|RS4X_HUMAN	8	770575	980000	8	770451	1000000	8	1416400	1980000	8	1008737	1350000	8	603666	805000	8	1104065	1520000	8	981991	1330000	8	1008062	1380000	8	860498	1200000	8	912224	1270000	8	1062901	1440000	8	1224687	1670000	8	1020863	1490000	8	945597	1340000	8	926844	1260000	8	1460412
P62714	Serine/threonine-protein phosphatase 2A catalytic subunit beta isoform OS=Homo sapiens OX=9606 GN=PPP2CB PE=1 SV=1	sp|P62714|PP2AB_HUMAN	2	17104	34200	2	9540	19100	2	53360	107000	2	30798	61600	2	26333	52700	2	25380	50800	2	26431	52900	2	32742	65500	2	30500	61000	2	33072	66100	2	30423	60800	2	57243	114000	2	36489	73000	2	22682	45400	2	19629	39300	2	27843
P62745	Rho-related GTP-binding protein RhoB OS=Homo sapiens OX=9606 GN=RHOB PE=1 SV=1	sp|P62745|RHOB_HUMAN	2	14094	14100	2	8387	8390	2	22057	22100	2	18478	11100	2	8818	8820	2	16177	16200	2	17100	9010	2	18353	18400	2	16567	10200	2	19633	14800	2	9513	9510	2	10041	4920	2	19445	19400	2	26632	26600	2	7954	7950	2	18223
P62750	60S ribosomal protein L23a OS=Homo sapiens OX=9606 GN=RPL23A PE=1 SV=1	sp|P62750|RL23A_HUMAN	5	102211	110000	5	116727	118000	5	263972	271000	5	157491	158000	5	100190	102000	5	257078	260000	5	144750	146000	5	210908	212000	5	162738	164000	5	178676	182000	5	177188	178000	5	207695	211000	5	225143	227000	5	185715	187000	5	126722	128000	5	231560
P62753	40S ribosomal protein S6 OS=Homo sapiens OX=9606 GN=RPS6 PE=1 SV=1	sp|P62753|RS6_HUMAN	8	272740	364000	8	360169	449000	8	722142	909000	8	570950	795000	8	309171	449000	8	593133	746000	8	371983	506000	8	566745	722000	8	441773	589000	8	516821	699000	8	453910	597000	8	431734	546000	8	561065	712000	8	474349	614000	8	377941	509000	8	612478
P62805	Histone H4 OS=Homo sapiens OX=9606 GN=HIST1H4A PE=1 SV=2	sp|P62805|H4_HUMAN	8	4363206	5430000	8	10367031	12300000	8	28261127	32800000	8	19844567	23000000	8	9669208	11100000	8	26985751	31200000	8	12410533	14300000	8	20656145	23600000	8	15632859	17900000	8	14309693	16400000	8	13329545	15400000	8	16715764	19400000	8	16569702	18700000	8	10333479	11500000	8	14445992	16800000	8	23590309
P62820	Ras-related protein Rab-1A OS=Homo sapiens OX=9606 GN=RAB1A PE=1 SV=3	sp|P62820|RAB1A_HUMAN	1	20494	20500	1	27956	28000	1	42078	42100	1	30838	30800	1	30611	30600	1	37137	37100	1	31489	31500	1	37787	37800	1	37901	37900	1	42310	42300	1	45539	45500	1	40484	40500	1	39834	39800	1	40230	40200	1	38140	38100	1	40532
P62826	GTP-binding nuclear protein Ran OS=Homo sapiens OX=9606 GN=RAN PE=1 SV=3	sp|P62826|RAN_HUMAN	9	806379	733000	9	853379	829000	9	1502115	1300000	9	970007	972000	9	584248	585000	9	1258685	1260000	9	842727	844000	9	1232337	1160000	9	991958	991000	9	1081131	1080000	9	1138086	1060000	9	1295444	1300000	9	929231	827000	9	735447	669000	9	1033679	960000	9	1402552
P62829	60S ribosomal protein L23 OS=Homo sapiens OX=9606 GN=RPL23 PE=1 SV=1	sp|P62829|RL23_HUMAN	9	1336450	1960000	9	1234347	1770000	9	2295432	3460000	9	1405476	2080000	9	866669	1310000	9	1809075	2680000	9	1199206	1790000	9	1636327	2460000	9	1417143	2130000	9	1498775	2260000	9	1449316	2200000	9	1547681	2290000	9	1518601	2310000	9	1272788	1930000	9	1230132	1850000	9	1855892
P62834	Ras-related protein Rap-1A OS=Homo sapiens OX=9606 GN=RAP1A PE=1 SV=1	sp|P62834|RAP1A_HUMAN	1	3020	#N/A	1	3270	3270	1	5033	5030	1	4029	4030	1	1832	1830	1	3372	3370	1	1534	1530	1	3738	3740	1	5802	5800	1	4353	4350	1	3442	3440	1	2798	2800	1	4552	#N/A	1	4248	4250	1	2723	2720	1	3417
P62841	40S ribosomal protein S15 OS=Homo sapiens OX=9606 GN=RPS15 PE=1 SV=2	sp|P62841|RS15_HUMAN	8	103835	199000	8	161636	321000	8	356136	704000	8	291084	579000	8	198488	395000	8	271201	541000	8	251553	502000	8	225488	449000	8	223950	446000	8	284660	567000	8	294856	586000	8	229891	458000	8	265595	528000	8	217691	433000	8	197566	394000	8	258570
P62851	40S ribosomal protein S25 OS=Homo sapiens OX=9606 GN=RPS25 PE=1 SV=1	sp|P62851|RS25_HUMAN	4	596604	593000	4	1094682	1090000	4	1883425	1880000	4	1171890	1170000	4	632898	633000	4	1464423	1460000	4	824257	824000	4	1321639	1320000	4	1111719	1110000	4	1042299	1040000	4	1060823	1060000	4	1309079	1310000	4	1075162	1080000	4	899787	900000	4	970471	970000	4	1498750
P62854	40S ribosomal protein S26 OS=Homo sapiens OX=9606 GN=RPS26 PE=1 SV=3	sp|P62854|RS26_HUMAN	2	150869	302000	2	157254	315000	2	283786	568000	2	230235	460000	2	153852	308000	2	275617	551000	2	208796	418000	2	256017	512000	2	176819	354000	2	260390	521000	2	225199	450000	2	258967	518000	2	254116	508000	2	222625	445000	2	212424	425000	2	339396
P62857	40S ribosomal protein S28 OS=Homo sapiens OX=9606 GN=RPS28 PE=1 SV=1	sp|P62857|RS28_HUMAN	3	118662	119000	3	143534	144000	3	469191	469000	3	234999	235000	3	146435	146000	3	266312	266000	3	221845	222000	3	285391	285000	3	222017	222000	3	231331	231000	3	181893	182000	3	292218	292000	3	341775	342000	3	203994	204000	3	186126	181000	3	345899
P62861	40S ribosomal protein S30 OS=Homo sapiens OX=9606 GN=FAU PE=1 SV=1	sp|P62861|RS30_HUMAN	1	259354	259000	1	303991	304000	1	499844	500000	1	288992	289000	1	182207	182000	1	409120	409000	1	261634	262000	1	340125	340000	1	293612	294000	1	304374	304000	1	328199	328000	1	387000	387000	1	304874	305000	1	322050	322000	1	288328	288000	1	393580
P62875	DNA-directed RNA polymerases I, II, and III subunit RPABC5 OS=Homo sapiens OX=9606 GN=POLR2L PE=1 SV=1	sp|P62875|RPAB5_HUMAN	2	6300	1860	2	15445	15400	2	11874	4610	2	7345	7340	2	7563	6270	2	15973	16000	2	12085	12100	2	9193	4720	2	4095	#N/A	2	29900	24500	2	16253	16300	2	16924	16900	2	13021	13000	2	9626	9630	2	9608	9610	2	18456
P62879	Guanine nucleotide-binding protein G(I)/G(S)/G(T) subunit beta-2 OS=Homo sapiens OX=9606 GN=GNB2 PE=1 SV=3	sp|P62879|GBB2_HUMAN	3	115160	217000	3	62449	117000	3	87858	154000	3	78945	140000	3	47173	87400	3	99627	180000	3	64272	117000	3	98982	174000	3	91299	170000	3	119216	213000	3	100450	176000	3	86245	160000	3	85578	159000	3	77051	138000	3	83434	147000	3	84907
P62888	60S ribosomal protein L30 OS=Homo sapiens OX=9606 GN=RPL30 PE=1 SV=2	sp|P62888|RL30_HUMAN	8	1187861	2380000	8	693804	1380000	8	1367386	2740000	8	873126	1740000	8	584885	1170000	8	1097275	2200000	8	815847	1650000	8	1124670	2260000	8	921255	1830000	8	1063286	2140000	8	1040618	2090000	8	1061026	2110000	8	845895	1690000	8	943374	1900000	8	945637	1900000	8	1179388
P62899	60S ribosomal protein L31 OS=Homo sapiens OX=9606 GN=RPL31 PE=1 SV=1	sp|P62899|RL31_HUMAN	1	29874	29900	1	17416	17400	1	34265	34300	1	20866	20900	1	9872	9870	1	22585	22600	1	18715	18700	1	36987	37000	1	21604	21600	1	25321	25300	1	17281	17300	1	26881	26900	1	13813	13800	1	12404	12400	1	26008	26000	1	31012
P62906	60S ribosomal protein L10a OS=Homo sapiens OX=9606 GN=RPL10A PE=1 SV=2	sp|P62906|RL10A_HUMAN	11	384631	484000	11	417466	499000	11	789740	1030000	11	463479	588000	11	297881	386000	11	623002	821000	11	437123	596000	11	570913	724000	11	511517	683000	11	563538	735000	11	511156	683000	11	606510	773000	11	520376	710000	11	418631	566000	11	420498	557000	11	702808
P62910	60S ribosomal protein L32 OS=Homo sapiens OX=9606 GN=RPL32 PE=1 SV=2	sp|P62910|RL32_HUMAN	5	90796	115000	5	92250	121000	5	185933	229000	5	112522	133000	5	61151	76300	5	174054	211000	5	110567	135000	5	135266	170000	5	132140	162000	5	159826	200000	5	133787	166000	5	139379	170000	5	136885	168000	5	135496	165000	5	129390	158000	5	168584
P62917	60S ribosomal protein L8 OS=Homo sapiens OX=9606 GN=RPL8 PE=1 SV=2	sp|P62917|RL8_HUMAN	7	237711	308000	7	244870	317000	7	427633	514000	7	354910	470000	7	197147	267000	7	383007	519000	7	279881	382000	7	381931	511000	7	294391	400000	7	392152	532000	7	325433	422000	7	314840	430000	7	400960	537000	7	378712	509000	7	254171	333000	7	440971
P62937	Peptidyl-prolyl cis-trans isomerase A OS=Homo sapiens OX=9606 GN=PPIA PE=1 SV=2	sp|P62937|PPIA_HUMAN	6	1639284	3190000	6	807337	1560000	6	1656413	3170000	6	2296563	4470000	6	1952564	3790000	6	1863369	3520000	6	1714155	3280000	6	1776398	3390000	6	1233370	2350000	6	1999743	3830000	6	1783377	3420000	6	1337235	2550000	6	1344182	2510000	6	1185735	2230000	6	1604502	3080000	6	1948318
P62942	Peptidyl-prolyl cis-trans isomerase FKBP1A OS=Homo sapiens OX=9606 GN=FKBP1A PE=1 SV=2	sp|P62942|FKB1A_HUMAN	5	426154	848000	5	238723	473000	5	692847	1380000	5	442461	881000	5	303410	605000	5	471004	934000	5	518775	1030000	5	589304	1160000	5	506759	1010000	5	616336	1230000	5	582974	1160000	5	455179	908000	5	282079	560000	5	493997	985000	5	692891	1370000	5	498384
P62979	Ubiquitin-40S ribosomal protein S27a OS=Homo sapiens OX=9606 GN=RPS27A PE=1 SV=2	sp|P62979|RS27A_HUMAN	5	322494	624000	5	312672	620000	5	690086	1360000	5	448878	887000	5	293249	574000	5	473796	933000	5	339349	677000	5	425338	844000	5	456896	910000	5	454642	903000	5	410046	817000	5	467159	921000	5	367748	724000	5	378264	731000	5	364067	720000	5	544829
P62993	Growth factor receptor-bound protein 2 OS=Homo sapiens OX=9606 GN=GRB2 PE=1 SV=1	sp|P62993|GRB2_HUMAN	3	233436	432000	3	24691	19100	3	343659	636000	3	245422	463000	3	179691	339000	3	113806	186000	3	31760	35400	3	36418	42500	3	242056	455000	3	202955	374000	3	30461	38000	3	39532	45700	3	46796	34100	3	120221	217000	3	36961	27600	3	263334
P63027	Vesicle-associated membrane protein 2 OS=Homo sapiens OX=9606 GN=VAMP2 PE=1 SV=3	sp|P63027|VAMP2_HUMAN	1	47558	47600	1	13205	13200	1	39881	39900	1	25533	25500	1	23349	23300	1	29693	29700	1	25311	25300	1	23004	23000	1	19399	19400	1	15293	15300	1	24174	24200	1	22333	22300	1	22155	22200	1	30878	30900	1	15553	15600	1	29717
P63104	14-3-3 protein zeta/delta OS=Homo sapiens OX=9606 GN=YWHAZ PE=1 SV=1	sp|P63104|1433Z_HUMAN	5	230864	386000	5	190998	302000	5	446468	728000	5	349165	536000	5	249220	379000	5	312990	515000	5	302728	493000	5	369907	576000	5	263802	435000	5	321722	529000	5	278841	450000	5	293279	472000	5	347292	573000	5	341472	552000	5	282722	455000	5	387423
P63165	Small ubiquitin-related modifier 1 OS=Homo sapiens OX=9606 GN=SUMO1 PE=1 SV=1	sp|P63165|SUMO1_HUMAN	1	3318	3320	1	1080	1080	1	2729	2730	1	761	#N/A	1	467	467	1	860	860	1	2275	#N/A	1	2196	2200	1	1122	1120	1	1267	1270	1	1117	#N/A	1	2663	2660	1	1113	#N/A	1	1024	1020	1	1647	#N/A	1	2538
P63167	Dynein light chain 1, cytoplasmic OS=Homo sapiens OX=9606 GN=DYNLL1 PE=1 SV=1	sp|P63167|DYL1_HUMAN	4	82202	146000	4	61722	112000	4	172540	327000	4	124341	224000	4	84784	157000	4	169166	309000	4	118568	209000	4	137064	245000	4	110219	193000	4	118309	213000	4	105835	189000	4	115823	209000	4	118175	221000	4	123593	214000	4	115092	204000	4	164124
P63172	Dynein light chain Tctex-type 1 OS=Homo sapiens OX=9606 GN=DYNLT1 PE=1 SV=1	sp|P63172|DYLT1_HUMAN	3	50312	22700	3	31821	31800	3	97411	97400	3	31694	27700	3	27143	24100	3	46360	46400	3	39413	39400	3	30817	13900	3	24770	24800	3	51643	51600	3	28408	28400	3	50157	7320	3	20814	12000	3	17715	17700	3	23684	23700	3	53041
P63173	60S ribosomal protein L38 OS=Homo sapiens OX=9606 GN=RPL38 PE=1 SV=2	sp|P63173|RL38_HUMAN	1	122582	123000	1	92514	92500	1	165161	165000	1	105158	105000	1	70106	70100	1	142919	143000	1	93655	93700	1	113534	114000	1	110664	111000	1	104516	105000	1	97232	97200	1	143452	143000	1	109176	109000	1	86822	86800	1	46048	46000	1	145226
P63220	40S ribosomal protein S21 OS=Homo sapiens OX=9606 GN=RPS21 PE=1 SV=1	sp|P63220|RS21_HUMAN	4	437767	438000	4	515470	515000	4	909145	909000	4	563371	563000	4	339145	339000	4	712153	712000	4	499988	500000	4	645836	646000	4	450936	451000	4	620773	621000	4	563056	563000	4	660484	660000	4	517573	518000	4	257456	257000	4	377892	378000	4	800111
P63244	Receptor of activated protein C kinase 1 OS=Homo sapiens OX=9606 GN=RACK1 PE=1 SV=3	sp|P63244|RACK1_HUMAN	18	1626135	1940000	18	1557560	1980000	18	3408895	3960000	18	2454430	3200000	18	1729924	2180000	18	2899852	3360000	18	2329107	2920000	18	2754026	3350000	18	2185912	2530000	18	2847848	3430000	18	2287425	2760000	18	2812745	3340000	18	2370694	2950000	18	2306293	2870000	18	2193009	2730000	18	2940242
P63261	Actin, cytoplasmic 2 OS=Homo sapiens OX=9606 GN=ACTG1 PE=1 SV=1	sp|P63261|ACTG_HUMAN	3	533633	1060000	3	267534	532000	3	387248	760000	3	263401	524000	3	238365	473000	3	365663	728000	3	309656	613000	3	357298	710000	3	305835	607000	3	393318	783000	3	384624	766000	3	325323	648000	3	344289	673000	3	332667	661000	3	369071	735000	3	389817
P63272	Transcription elongation factor SPT4 OS=Homo sapiens OX=9606 GN=SUPT4H1 PE=1 SV=1	sp|P63272|SPT4H_HUMAN	1	5674	5670	1	8155	#N/A	1	24583	24600	1	7043	#N/A	1	6393	6390	1	4697	#N/A	1	22743	22700	1	9478	9480	1	3140	3140	1	7792	7790	1	8055	8050	1	5253	#N/A	1	7313	#N/A	1	18026	#N/A	1	10370	#N/A	1	8685
P63279	SUMO-conjugating enzyme UBC9 OS=Homo sapiens OX=9606 GN=UBE2I PE=1 SV=1	sp|P63279|UBC9_HUMAN	1	9681	9680	1	10142	10100	1	8104	8100	1	4979	4980	1	8396	8400	1	14138	14100	1	3661	#N/A	1	11770	11800	1	13056	13100	1	14204	14200	1	9174	9170	1	7320	7320	1	4312	#N/A	1	10806	10800	1	5863	5860	1	14497
P63313	Thymosin beta-10 OS=Homo sapiens OX=9606 GN=TMSB10 PE=1 SV=2	sp|P63313|TYB10_HUMAN	2	25272	50500	2	14382	28800	2	71454	143000	2	28753	57500	2	12266	24500	2	16316	32600	2	21901	43800	2	20537	41100	2	25921	51800	2	20742	41500	2	19318	38600	2	13358	26700	2	14434	28900	2	14108	28200	2	23153	46300	2	29290
P67809	Nuclease-sensitive element-binding protein 1 OS=Homo sapiens OX=9606 GN=YBX1 PE=1 SV=3	sp|P67809|YBOX1_HUMAN	4	56677	157000	4	123539	357000	4	264117	751000	4	191495	547000	4	82965	236000	4	190608	540000	4	123561	360000	4	161408	460000	4	73072	190000	4	132846	377000	4	137228	394000	4	187255	533000	4	151531	428000	4	100401	290000	4	128502	363000	4	215405
P67870	Casein kinase II subunit beta OS=Homo sapiens OX=9606 GN=CSNK2B PE=1 SV=1	sp|P67870|CSK2B_HUMAN	7	102231	114000	7	87295	110000	7	313798	362000	7	134040	184000	7	87476	128000	7	177837	269000	7	125529	193000	7	141586	216000	7	117255	148000	7	127516	175000	7	129455	189000	7	132958	169000	7	154648	244000	7	131418	216000	7	100233	156000	7	161547
P67936	Tropomyosin alpha-4 chain OS=Homo sapiens OX=9606 GN=TPM4 PE=1 SV=3	sp|P67936|TPM4_HUMAN	2	41213	82400	2	27613	55200	2	100001	200000	2	62538	125000	2	31215	62400	2	74319	149000	2	61709	123000	2	71123	142000	2	46262	92500	2	73065	146000	2	38208	76400	2	48225	96500	2	57553	115000	2	49619	99200	2	50410	101000	2	76517
P67936-2	Isoform 2 of Tropomyosin alpha-4 chain OS=Homo sapiens OX=9606 GN=TPM4	sp|P67936-2|TPM4_HUMAN	2	5658	11300	2	2194	4390	2	13746	27500	2	2461	4920	2	1001	2000	2	2500	5000	2	3134	6270	2	6215	12400	2	3021	6040	2	5460	10900	2	5407	10800	2	1054	2110	2	3746	7490	2	1062	2120	2	2195	4390	2	17847
P68371	Tubulin beta-4B chain OS=Homo sapiens OX=9606 GN=TUBB4B PE=1 SV=1	sp|P68371|TBB4B_HUMAN	1	253393	253000	1	249225	249000	1	603727	604000	1	312427	312000	1	241551	242000	1	466079	466000	1	300329	300000	1	432441	432000	1	398159	398000	1	359191	359000	1	275704	276000	1	391363	391000	1	241976	242000	1	156790	157000	1	317930	318000	1	533491
P68402	Platelet-activating factor acetylhydrolase IB subunit beta OS=Homo sapiens OX=9606 GN=PAFAH1B2 PE=1 SV=1	sp|P68402|PA1B2_HUMAN	2	86911	86900	2	94911	94900	2	256046	256000	2	152298	152000	2	112885	113000	2	228995	229000	2	172642	173000	2	230759	231000	2	177053	177000	2	209504	210000	2	165152	165000	2	189099	182000	2	236101	236000	2	209018	209000	2	150857	151000	2	213730
P68431	Histone H3.1 OS=Homo sapiens OX=9606 GN=HIST1H3A PE=1 SV=2	sp|P68431|H31_HUMAN	7	179138	659000	7	64184	232000	7	323628	1170000	7	289283	1060000	7	87806	315000	7	318735	1170000	7	214825	779000	7	369095	1350000	7	172865	630000	7	383360	1400000	7	401396	1460000	7	68930	253000	7	130014	473000	7	183836	669000	7	221414	815000	7	354061
P69905	Hemoglobin subunit alpha OS=Homo sapiens OX=9606 GN=HBA1 PE=1 SV=2	sp|P69905|HBA_HUMAN	5	982666	941000	5	135996	141000	5	320990	335000	5	131715	119000	5	78159	28000	5	116083	42800	5	177001	182000	5	118870	125000	5	100162	51400	5	144292	34700	5	162005	170000	5	141836	57300	5	82196	87300	5	80568	82400	5	103592	101000	5	145688
P78318	Immunoglobulin-binding protein 1 OS=Homo sapiens OX=9606 GN=IGBP1 PE=1 SV=1	sp|P78318|IGBP1_HUMAN	6	117230	109000	6	62131	62100	6	126289	66700	6	102183	96700	6	58841	58800	6	151966	140000	6	199883	200000	6	150498	151000	6	74204	74200	6	68729	63200	6	258612	244000	6	111502	112000	6	73784	73800	6	114491	107000	6	57336	57300	6	188802
P78330	Phosphoserine phosphatase OS=Homo sapiens OX=9606 GN=PSPH PE=1 SV=2	sp|P78330|SERB_HUMAN	5	197115	197000	5	86577	68800	5	136598	137000	5	92565	92600	5	48896	43800	5	101671	94700	5	78492	49700	5	94439	94400	5	98551	48600	5	95219	71900	5	84275	80100	5	105262	88500	5	99844	99800	5	82504	82500	5	95406	91000	5	139626
P78344	Eukaryotic translation initiation factor 4 gamma 2 OS=Homo sapiens OX=9606 GN=EIF4G2 PE=1 SV=1	sp|P78344|IF4G2_HUMAN	2	38076	#N/A	2	13737	#N/A	2	47717	8260	2	15777	15800	2	25491	25500	2	52687	52700	2	43247	43200	2	28003	5520	2	5151	3160	2	15669	15700	2	8035	8040	2	37169	32300	2	35200	9590	2	22633	12700	2	20837	9640	2	51728
P78345	Ribonuclease P protein subunit p38 OS=Homo sapiens OX=9606 GN=RPP38 PE=1 SV=2	sp|P78345|RPP38_HUMAN	2	10529	10500	2	7173	7170	2	21312	21300	2	9526	9530	2	7927	7930	2	10062	8090	2	6510	6510	2	21772	21800	2	7075	6590	2	16677	14000	2	9547	9550	2	13298	13300	2	10745	10700	2	16631	16600	2	13855	11700	2	13212
P78356	Phosphatidylinositol 5-phosphate 4-kinase type-2 beta OS=Homo sapiens OX=9606 GN=PIP4K2B PE=1 SV=1	sp|P78356|PI42B_HUMAN	1	34795	34800	1	11772	11800	1	28627	28600	1	13778	13800	1	9101	9100	1	23356	23400	1	10109	10100	1	21501	21500	1	13984	14000	1	20689	20700	1	10555	10600	1	17907	#N/A	1	9341	#N/A	1	16910	16900	1	15122	15100	1	14908
P78357	Contactin-associated protein 1 OS=Homo sapiens OX=9606 GN=CNTNAP1 PE=1 SV=1	sp|P78357|CNTP1_HUMAN	14	131414	86500	14	80098	67700	14	134354	112000	14	111119	74500	14	62225	55900	14	123358	104000	14	69562	68700	14	133930	98100	14	85353	74400	14	97057	69400	14	132074	75900	14	94959	54100	14	101813	102000	14	123567	81600	14	100065	93600	14	91468
P78371	T-complex protein 1 subunit beta OS=Homo sapiens OX=9606 GN=CCT2 PE=1 SV=4	sp|P78371|TCPB_HUMAN	2	170159	340000	2	219850	440000	2	200667	401000	2	295817	592000	2	165285	331000	2	176810	354000	2	128119	256000	2	134045	268000	2	128232	256000	2	137395	275000	2	143004	286000	2	141697	283000	2	124409	249000	2	92973	186000	2	111896	224000	2	168728
P78406	mRNA export factor OS=Homo sapiens OX=9606 GN=RAE1 PE=1 SV=1	sp|P78406|RAE1L_HUMAN	4	120503	121000	4	90786	90800	4	113446	113000	4	66897	44300	4	45325	33100	4	137486	108000	4	79705	73100	4	108964	109000	4	66490	66500	4	84872	84900	4	97345	97300	4	84596	66300	4	61622	61600	4	66349	66300	4	80874	80900	4	103517
P78527	DNA-dependent protein kinase catalytic subunit OS=Homo sapiens OX=9606 GN=PRKDC PE=1 SV=3	sp|P78527|PRKDC_HUMAN	1	5092	#N/A	1	6921	#N/A	1	8039	8040	1	2484	2480	1	1271	1270	1	4002	#N/A	1	7949	7950	1	6292	6290	1	2728	#N/A	1	3559	#N/A	1	7173	7170	1	10545	10500	1	2843	2840	1	3394	#N/A	1	6099	6100	1	7677
P78560	Death domain-containing protein CRADD OS=Homo sapiens OX=9606 GN=CRADD PE=1 SV=1	sp|P78560|CRADD_HUMAN	1	3831	3830	1	4297	4300	1	4438	4440	1	7360	7360	1	2565	2570	1	2461	2460	1	9997	10000	1	4229	4230	1	5616	5620	1	6475	6480	1	7438	7440	1	4049	4050	1	3855	3860	1	5491	5490	1	4755	4760	1	5301
P80404	4-aminobutyrate aminotransferase, mitochondrial OS=Homo sapiens OX=9606 GN=ABAT PE=1 SV=3	sp|P80404|GABT_HUMAN	1	14818	14800	1	5742	5740	1	22067	22100	1	11453	11500	1	3936	3940	1	3676	3680	1	4146	4150	1	3443	3440	1	8510	8510	1	5971	5970	1	11535	11500	1	6218	6220	1	4540	4540	1	10431	10400	1	17512	17500	1	17356
P81274	G-protein-signaling modulator 2 OS=Homo sapiens OX=9606 GN=GPSM2 PE=1 SV=3	sp|P81274|GPSM2_HUMAN	1	62343	62300	1	21634	#N/A	1	80135	80100	1	17148	#N/A	1	5706	5710	1	5312	5310	1	4152	4150	1	12744	12700	1	8237	8240	1	9168	#N/A	1	2380	#N/A	1	5269	5270	1	29219	#N/A	1	32164	#N/A	1	20897	#N/A	1	5253
P82650	28S ribosomal protein S22, mitochondrial OS=Homo sapiens OX=9606 GN=MRPS22 PE=1 SV=1	sp|P82650|RT22_HUMAN	2	32585	1110	2	42616	42600	2	51166	25300	2	24223	24200	2	7927	7930	2	34425	34400	2	14232	14200	2	24097	24100	2	26650	7770	2	15991	16000	2	15412	15400	2	9969	9970	2	26650	26700	2	12423	12400	2	13948	6440	2	33764
P82673	28S ribosomal protein S35, mitochondrial OS=Homo sapiens OX=9606 GN=MRPS35 PE=1 SV=1	sp|P82673|RT35_HUMAN	1	2402	2400	1	4251	4250	1	7008	7010	1	12385	12400	1	12369	12400	1	13100	13100	1	6504	6500	1	6922	6920	1	5496	5500	1	9717	9720	1	16119	16100	1	3880	3880	1	6659	6660	1	5431	5430	1	2488	2490	1	9203
P82909	28S ribosomal protein S36, mitochondrial OS=Homo sapiens OX=9606 GN=MRPS36 PE=1 SV=2	sp|P82909|RT36_HUMAN	9	49435	60900	9	43927	60700	9	50230	62800	9	29766	44500	9	25797	23100	9	47935	62300	9	26025	36400	9	52548	64600	9	28515	41500	9	43307	37000	9	37474	56500	9	39507	47300	9	31716	45400	9	25999	37000	9	23443	31600	9	47483
P82914	28S ribosomal protein S15, mitochondrial OS=Homo sapiens OX=9606 GN=MRPS15 PE=1 SV=1	sp|P82914|RT15_HUMAN	2	119038	119000	2	20914	20900	2	26160	26200	2	124101	124000	2	7707	7710	2	29069	10600	2	12013	4380	2	7194	1900	2	21212	#N/A	2	16102	5760	2	8741	6330	2	143834	144000	2	11847	11800	2	13314	13300	2	9817	3780	2	31322
P82921	28S ribosomal protein S21, mitochondrial OS=Homo sapiens OX=9606 GN=MRPS21 PE=1 SV=3	sp|P82921|RT21_HUMAN	1	2507	2510	1	1593	1590	1	8006	8010	1	6581	6580	1	1184	1180	1	7985	7980	1	5162	5160	1	8623	8620	1	6190	6190	1	7944	#N/A	1	5087	5090	1	6034	6030	1	3421	3420	1	821	821	1	7065	7070	1	1953
P82930	28S ribosomal protein S34, mitochondrial OS=Homo sapiens OX=9606 GN=MRPS34 PE=1 SV=2	sp|P82930|RT34_HUMAN	1	2011	2010	1	831	831	1	997	997	1	1492	1490	1	2939	2940	1	1777	1780	1	1678	1680	1	2504	2500	1	673	674	1	1655	1660	1	1637	1640	1	2105	2110	1	1659	1660	1	1043	1040	1	1994	1990	1	1720
P82932	28S ribosomal protein S6, mitochondrial OS=Homo sapiens OX=9606 GN=MRPS6 PE=1 SV=3	sp|P82932|RT06_HUMAN	1	15347	#N/A	1	6672	6670	1	9415	9420	1	5401	#N/A	1	3672	3670	1	4818	4820	1	9927	9930	1	12193	12200	1	8966	8970	1	3424	#N/A	1	7179	#N/A	1	10962	#N/A	1	6379	6380	1	8876	8880	1	7690	7690	1	9619
P82933	28S ribosomal protein S9, mitochondrial OS=Homo sapiens OX=9606 GN=MRPS9 PE=1 SV=2	sp|P82933|RT09_HUMAN	2	23742	23700	2	7532	7530	2	20755	20800	2	10212	8570	2	8587	8590	2	9699	9700	2	6263	6260	2	13290	13300	2	10966	11000	2	11194	8650	2	14479	14500	2	11678	11700	2	16171	14200	2	16833	16800	2	15081	15100	2	12830
[truncated: 1,659 more rows]
[truncated: 22 more columns]

## Sheet: S4. Differentially expressed
	Supplementary Table S4: A protein summary of the proteins that were differentially expressed when SMA and control fibroblast extracts were quantitatively compared following SWATH mass spectrometry. Only proteins that met the following criteria were included: detected with 2 or more peptides; a fold change of ≥1.25 or ≤0.80; reached a significant difference of p<0.05. For each protein identified, …
[truncated: 232 more rows]

[truncated: 2 more sheets: S5. BioLayout Clusters, S6. Biolayout trends]
